# Supplementary material for: Simultaneous Analysis of Proteome, Phospho- and Glycoproteome of Rat Kidney Tissue with Electrostatic Repulsion Hydrophilic Interaction Chromatography
Source: PLoS One. 2011 Feb 23;6(2):e16884. doi: 10.1371/journal.pone.0016884 (PMC3044146; doi:10.1371/journal.pone.0016884)
Supplement: Table S3 — Summary of the glycoproteins and their glycosylation sites identified in all analyses. (XLS) [file pone.0016884.s007.xls]

## Sheet: SCX01
Glycoproteins identified in SCX01
IPI	description	pep_start	pep_end	glycoPep	mod	glycoSite
IPI00188541	Tax_Id=10116 Gene_Symbol=Itih4 inter-alpha-inhibitor H4 heavy chain	561	581	R.ISASGAELEALEAQVLgNLSLK.Y	0.000000000000000040000.0	577
IPI00188728	Tax_Id=10116 Gene_Symbol=Mfap3l Microfibrillar-associated protein 3-like precursor	60	79	K.EGNSALIgNCSAFGIPDLEYK.W	0.00000004000000000000.0	67
IPI00188881	Tax_Id=10116 Gene_Symbol=Slc22a2 Organic cation transporter OCT2	92	114	R.YEVDWgNQSTLDCVDPLSSLAADR.N	0.00000400000000000000000.0	97
IPI00188885	Tax_Id=10116 Gene_Symbol=Agrn Isoform 1 of Agrin precursor	811	830	K.AGFAQCICPTLTCPEAgNSTK.V	0.00000000000000004000.0	827
IPI00188924	Tax_Id=10116 Gene_Symbol=Uqcrc2 Cytochrome b-c1 complex subunit 2, mitochondrial precursor	359	374	K.AVAQGgNLSSADVQAAK.N	0.0000040000000000.0	364
IPI00188956	Tax_Id=10116 Gene_Symbol=Thy1 Thy-1 membrane glycoprotein precursor	88	107	K.VLTLAgNFTTKDEGDYMCELR.V	0.00000400000000000000.0	93
IPI00188956	Tax_Id=10116 Gene_Symbol=Thy1 Thy-1 membrane glycoprotein precursor	88	97	K.VLTLAgNFTTK.D	0.0000040000.0	93
IPI00189714	Tax_Id=10116 Gene_Symbol=Col12a1 similar to Collagen alpha-1(XII) chain precursor	1776	1790	R.NLQVYgNATSNSLTVK.W	0.000004000000000.0	1781
IPI00189714	Tax_Id=10116 Gene_Symbol=Col12a1 similar to Collagen alpha-1(XII) chain precursor	2693	2707	K.EAGgNITTDGYEILGK.L	0.000400000000000.0	2696
IPI00190577	Tax_Id=10116 Gene_Symbol=Lama5 similar to Laminin alpha-5 chain precursor	2198	2208	R.GIgNASSTAWAR.L	0.00400000000.0	2200
IPI00190577	Tax_Id=10116 Gene_Symbol=Lama5 similar to Laminin alpha-5 chain precursor	2212	2222	R.LgNASIADLQSK.L	0.04000000000.0	2213
IPI00190577	Tax_Id=10116 Gene_Symbol=Lama5 similar to Laminin alpha-5 chain precursor	2225	2253	R.SPLGPHgNQTAEQLQTLEQQSISLQQDTER.L	0.00000040000000000000000000000.0	2231
IPI00190577	Tax_Id=10116 Gene_Symbol=Lama5 similar to Laminin alpha-5 chain precursor	2295	2317	R.ALNELASQGFPGgNATTPSGEQLR.W	0.00000000000040000000000.0	2307
IPI00190577	Tax_Id=10116 Gene_Symbol=Lama5 similar to Laminin alpha-5 chain precursor	2421	2431	K.QELSQDgNATLK.A	0.00000040000.0	2427
IPI00190577	Tax_Id=10116 Gene_Symbol=Lama5 similar to Laminin alpha-5 chain precursor	2568	2586	R.QLLAgNSSALVETILGHQER.L	0.0000400000000000000.0	2572
IPI00190577	Tax_Id=10116 Gene_Symbol=Lama5 similar to Laminin alpha-5 chain precursor	3201	3218	R.VFADGAPHYVAFYSgNVTR.V	0.000000000000004000.0	3215
IPI00190577	Tax_Id=10116 Gene_Symbol=Lama5 similar to Laminin alpha-5 chain precursor	3282	3312	R.VFDLHQNMGSVgNVSVGCTPAQLQTSGATAQK.V	0.0000000000040000000000000000000.0	3293
IPI00190577	Tax_Id=10116 Gene_Symbol=Lama5 similar to Laminin alpha-5 chain precursor	88	117	K.LVGGPVAGGDPgNQTIQGQYCDICIAANSNK.A	0.000000000004000000000000000000.0	99
IPI00190577	Tax_Id=10116 Gene_Symbol=Lama5 similar to Laminin alpha-5 chain precursor	924	933	R.LgNVTSPDLFR.L	0.0400000000.0	925
IPI00190606	Tax_Id=10116 Gene_Symbol=Myl1 Myosin light chain 1, skeletal muscle isoform	133	148	R.VFDKEGgNGTVMGAELR.H	0.0000004000000000.0	139
IPI00190776	Tax_Id=10116 Gene_Symbol=Cspg2 Isoform V0 of Versican core protein precursor (Fragment)	328	340	R.FEgNQTCFPLPDSR.F	0.0040000000000.0	330
IPI00191090	Tax_Id=10116 Gene_Symbol=Bgn Biglycan precursor	268	281	R.MIEgNGSLSFLPTLR.E	0.00040000000000.0	271
IPI00191090	Tax_Id=10116 Gene_Symbol=Bgn Biglycan precursor	268	281	R.MIEgNGSLSFLPTLR.E	0.10040000000000.0	271
IPI00191103	Tax_Id=10116 Gene_Symbol=Ndufa2_predicted NADH dehydrogenase (ubiquinone) 1 alpha subcomplex, 2	74	87	K.gNVSLNNLSAAEVTK.A	0.40000000000000.0	74
IPI00191437	Tax_Id=10116 Gene_Symbol=- 64 kDa protein	134	152	R.YGYEgNDTEIANLYDEMVAK.Q	0.0000400000000000000.0	138
IPI00191437	Tax_Id=10116 Gene_Symbol=- 64 kDa protein	134	152	R.YGYEgNDTEIANLYDEMVAK.Q	0.0000400000000001000.0	138
IPI00191437	Tax_Id=10116 Gene_Symbol=- 64 kDa protein	195	216	R.VILILDPAISGgNETEPYPAFTR.G	0.0000000000040000000000.0	206
IPI00191437	Tax_Id=10116 Gene_Symbol=- 64 kDa protein	237	260	K.VWPDYPgNITVDPSLDWDSQVQQYR.A	0.000000400000000000000000.0	243
IPI00191437	Tax_Id=10116 Gene_Symbol=- 64 kDa protein	271	278	R.gNSTALWWK.N	0.40000000.0	271
IPI00191681	Tax_Id=10116 Gene_Symbol=Itgb1 Integrin beta-1 precursor	203	220	K.LRNPCTSEQgNCTSPFSYK.N	0.000000000400000000.0	212
IPI00191681	Tax_Id=10116 Gene_Symbol=Itgb1 Integrin beta-1 precursor	205	220	R.NPCTSEQgNCTSPFSYK.N	0.0000000400000000.0	212
IPI00191681	Tax_Id=10116 Gene_Symbol=Itgb1 Integrin beta-1 precursor	34	63	K.SCGECIQAGPNCGWCTgNTTFLQEGMPTSAR.C	0.000000000000000040000000000000.0	50
IPI00191681	Tax_Id=10116 Gene_Symbol=Itgb1 Integrin beta-1 precursor	34	63	K.SCGECIQAGPNCGWCTgNTTFLQEGMPTSAR.C	0.000000000000000040000000100000.0	50
IPI00191681	Tax_Id=10116 Gene_Symbol=Itgb1 Integrin beta-1 precursor	519	540	R.KEgNSSEICSNNGECVCGQCVCR.K	0.0040000000000000000000.0	521
IPI00191681	Tax_Id=10116 Gene_Symbol=Itgb1 Integrin beta-1 precursor	519	540	R.KEgNSSEICSNNGECVCGQCVCR.K	0.0040000000400000000000.0	521
IPI00191681	Tax_Id=10116 Gene_Symbol=Itgb1 Integrin beta-1 precursor	519	540	R.KEgNSSEICSNNGECVCGQCVCR.K	0.0040000004000000000000.0	521
IPI00191681	Tax_Id=10116 Gene_Symbol=Itgb1 Integrin beta-1 precursor	520	540	K.EgNSSEICSNNGECVCGQCVCR.K	0.040000000000000000000.0	521
IPI00191681	Tax_Id=10116 Gene_Symbol=Itgb1 Integrin beta-1 precursor	659	673	K.KDTCAQECSHFgNLTK.V	0.000000000004000.0	670
IPI00191681	Tax_Id=10116 Gene_Symbol=Itgb1 Integrin beta-1 precursor	660	673	K.DTCAQECSHFgNLTK.V	0.00000000004000.0	670
IPI00191707	Tax_Id=10116 Gene_Symbol=Pdha1 Pyruvate dehydrogenase E1 component subunit alpha, somatic form, mitochondrial precursor	89	119	R.GFCHLCDGQEACCVGLEAGIgNPTDHLITAYR.A	0.0000000000000000000040000000000.0	109
IPI00191711	Tax_Id=10116 Gene_Symbol=LOC259246;LOC298116;LOC259245 Major urinary protein precursor	49	58	R.EKIEEgNGSMR.V	0.0000040000.0	54
IPI00191737	Tax_Id=10116 Gene_Symbol=Alb Serum albumin precursor	131	168	K.DDNPNLPPFQRPEAEAMCTSFQEgNPTSFLGHYLHEVAR.R	0.00000000000000000000000400000000000000.0	154
IPI00191738	Tax_Id=10116 Gene_Symbol=Gclm Glutamate--cysteine ligase regulatory subunit	95	107	K.LFIVGSgNSSSSTR.N	0.0000004000000.0	101
IPI00191766	Tax_Id=10116 Gene_Symbol=L1cam Isoform 1 of Neural cell adhesion molecule L1 precursor	963	975	K.EQLFFgNLSDPELR.T	0.0000040000000.0	968
IPI00191789	Tax_Id=10116 Gene_Symbol=Hrg Histidine-rich glycoprotein	110	127	R.YSgNESQDLSVNGYgNCTMR.S	0.004000000000040000.0	112123
IPI00191789	Tax_Id=10116 Gene_Symbol=Hrg Histidine-rich glycoprotein	110	127	R.YSgNESQDLSVNGYgNCTMR.S	0.004000000040040000.0	112123
IPI00191919	Tax_Id=10116 Gene_Symbol=Susd2_predicted sushi domain containing 2	684	708	R.LCESDHFCVLDVISTGDPSVGgNATR.I	0.0000000000000000000004000.0	705
IPI00191929	Tax_Id=10116 Gene_Symbol=Tmem27 Collectrin precursor	65	80	R.EGTEISHVLLCgNVTQR.V	0.0000000000040000.0	76
IPI00192159	Tax_Id=10116 Gene_Symbol=Ube2d3 Ubiquitin-conjugating enzyme E2 D3	76	93	R.IYHPNINSgNGSICLDILR.S	0.000000004000000000.0	84
IPI00192279	Tax_Id=10116 Gene_Symbol=- 28 kDa protein	206	219	K.NAIAgNASTLAEVER.L	0.00004000000000.0	210
IPI00192279	Tax_Id=10116 Gene_Symbol=- 28 kDa protein	235	255	R.RSGPSDEGEEEMEDGTVTgNGS.-	0.000000000000000000400.0	253
IPI00192310	Tax_Id=10116 Gene_Symbol=Bcam Lutheran antigen	314	323	K.GgNLTLEGVHR.S	0.0400000000.0	315
IPI00192458	Tax_Id=10116 Gene_Symbol=RGD1563860_predicted similar to ribosomal protein S6 kinase polypeptide 3	844	854	R.gNQSPVLEPVGR.S	0.40000000000.0	844
IPI00192495	Tax_Id=10116 Gene_Symbol=Ncstn Isoform 1 of Nicastrin precursor	500	519	K.LAGGTNFgNNSIQADPQTVTR.L	0.00000004000000000000.0	507
IPI00192495	Tax_Id=10116 Gene_Symbol=Ncstn Isoform 1 of Nicastrin precursor	52	82	R.LLgNATHQIGCQSSISGDTGVIHVVEKEDDLK.W	0.0040000000000000000000000000000.0	54
IPI00192495	Tax_Id=10116 Gene_Symbol=Ncstn Isoform 1 of Nicastrin precursor	577	596	K.VTgNLTQEQCQDPSKVPNESK.D	0.00400000000000000000.0	579
IPI00192495	Tax_Id=10116 Gene_Symbol=Ncstn Isoform 1 of Nicastrin precursor	577	596	K.VTgNLTQEQCQDPSKVPgNESK.D	0.00400000000000004000.0	579593
IPI00192504	Tax_Id=10116 Gene_Symbol=Mrc2 Macrophage mannose receptor 2 precursor	490	504	R.WNDSPCgNQSLPSICK.K	0.000000400000000.0	496
IPI00192504	Tax_Id=10116 Gene_Symbol=Mrc2 Macrophage mannose receptor 2 precursor	63	75	R.VIPVCgNASLPAQR.W	0.0000040000000.0	68
IPI00192796	Tax_Id=10116 Gene_Symbol=RGD1564625_predicted similar to Transmembrane 9 superfamily protein member 3 precursor	302	312	R.IVDVgNLTSEGK.V	0.00004000000.0	306
IPI00193010	Tax_Id=10116 Gene_Symbol=Slc23a3_predicted solute carrier family 23 (nucleobase transporters), member 3	138	147	K.TPGgNASLSLR.L	0.0004000000.0	141
IPI00193397	Tax_Id=10116 Gene_Symbol=Slc34a1 Sodium-dependent phosphate transport protein 2A	284	303	K.SVITSIAVGDESLRgNHSLIR.I	0.00000000000000400000.0	298
IPI00193397	Tax_Id=10116 Gene_Symbol=Slc34a1 Sodium-dependent phosphate transport protein 2A	320	333	R.VEAIGSLAgNTTMEK.C	0.00000000400000.0	328
IPI00193397	Tax_Id=10116 Gene_Symbol=Slc34a1 Sodium-dependent phosphate transport protein 2A	320	333	R.VEAIGSLAgNTTMEK.C	0.00000000400100.0	328
IPI00193425	Tax_Id=10116 Gene_Symbol=Bsg Isoform 2 of Basigin precursor	143	160	K.TSDTGDQTISgNGTEANSK.Y	0.000000000040000000.0	153
IPI00193425	Tax_Id=10116 Gene_Symbol=Bsg Isoform 2 of Basigin precursor	143	160	K.TSDTGDQTISgNGTEANSK.Y	0.000000000040000400.0	153
IPI00193425	Tax_Id=10116 Gene_Symbol=Bsg Isoform 2 of Basigin precursor	37	54	K.TQLTCFLgNSSGIDIVGHR.W	0.000000040000000000.0	44
IPI00193485	Tax_Id=10116 Gene_Symbol=LOC361596 Isocitrate dehydrogenase [NADP], mitochondrial precursor	427	442	K.LNEHFLgNTTDFLDTIK.S	0.0000004000000000.0	433
IPI00193765	Tax_Id=10116 Gene_Symbol=Ctsc Dipeptidyl-peptidase 1 precursor	272	308	R.ILTgNNSQTPILSPQEVVSCSPYAQGCDGGFPYLIAGK.Y	0.0004000000000000000000000000000000000.0	275
IPI00193869	Tax_Id=10116 Gene_Symbol=Clptm1_predicted cleft lip and palate associated transmembrane protein 1	2	33	M.AAAQEADGAGSAVVAAGGGSSGQVTSgNGSIGR.D	0.00000000000000000000000000400000.0	28
IPI00193894	Tax_Id=10116 Gene_Symbol=Mgam_predicted 198 kDa protein	1290	1311	R.VILILDPAISGgNETEPYPAFTR.G	0.0000000000040000000000.0	1301
IPI00193894	Tax_Id=10116 Gene_Symbol=Mgam_predicted 198 kDa protein	1366	1373	R.gNSTALWWK.K	0.40000000.0	1366
IPI00193894	Tax_Id=10116 Gene_Symbol=Mgam_predicted 198 kDa protein	426	449	K.LVIILDPAISgNNSLSSNPYGPYDR.G	0.000000000040000000000000.0	436
IPI00193894	Tax_Id=10116 Gene_Symbol=Mgam_predicted 198 kDa protein	455	468	K.VWVgNSSDGNALIGK.V	0.00040000000000.0	458
IPI00193894	Tax_Id=10116 Gene_Symbol=Mgam_predicted 198 kDa protein	942	959	R.IDCYPDEHGVSEAgNCTAR.G	0.000000000000040000.0	955
IPI00193983	Tax_Id=10116 Gene_Symbol=Cltc Clathrin heavy chain	1074	1094	R.KFDVgNTSAVQVLIEHIGNLDR.A	0.000040000000000000000.0	1078
IPI00194567	Tax_Id=10116 Gene_Symbol=Trim28 similar to Transcription intermediary factor 1-beta	410	429	K.IVAERPGTgNSTGPGPMAPPR.A	0.00000000400000000000.0	418
IPI00194958	Tax_Id=10116 Gene_Symbol=Picalm Isoform 2 of Phosphatidylinositol-binding clathrin assembly protein	447	474	K.STNVAVDSGGGLLKPTVASQgNQSLPVAK.L	0.0000000000000000000040000000.0	467
IPI00194958	Tax_Id=10116 Gene_Symbol=Picalm Isoform 2 of Phosphatidylinositol-binding clathrin assembly protein	480	504	K.LVSDDLDSSLANLVGNLGIGgNGTTK.N	0.0000000000000000000040000.0	500
IPI00195148	Tax_Id=10116 Gene_Symbol=Es2 Liver carboxylesterase 1 precursor	300	316	K.LDgNTSMSTVIDGVVLPK.T	0.00400000000000000.0	302
IPI00195148	Tax_Id=10116 Gene_Symbol=Es2 Liver carboxylesterase 1 precursor	369	387	K.RFSPNLgNISESVIPAIIEK.Y	0.0000004000000000000.0	375
IPI00195148	Tax_Id=10116 Gene_Symbol=Es2 Liver carboxylesterase 1 precursor	370	387	R.FSPNLgNISESVIPAIIEK.Y	0.000004000000000000.0	375
IPI00195160	Tax_Id=10116 Gene_Symbol=Psap Sulfated glycoprotein 1 precursor	213	226	R.TgNSSFVQGLVDHVK.E	0.04000000000000.0	214
IPI00195160	Tax_Id=10116 Gene_Symbol=Psap Sulfated glycoprotein 1 precursor	213	231	R.TgNSSFVQGLVDHVKEDCDR.L	0.0400000000000000000.0	214
IPI00195160	Tax_Id=10116 Gene_Symbol=Psap Sulfated glycoprotein 1 precursor	213	241	R.TgNSSFVQGLVDHVKEDCDRLGPGVSDICK.N	0.04000000000000000000000000000.0	214
IPI00195160	Tax_Id=10116 Gene_Symbol=Psap Sulfated glycoprotein 1 precursor	445	468	K.LVIYLEHNLEKgNSTKEEILAALEK.G	0.000000000004000000000000.0	456
IPI00195160	Tax_Id=10116 Gene_Symbol=Psap Sulfated glycoprotein 1 precursor	68	92	K.TVVTEAGNLLKDgNATEEEILHYLEK.T	0.0000000000004000000000000.0	80
IPI00195160	Tax_Id=10116 Gene_Symbol=Psap Sulfated glycoprotein 1 precursor	79	92	K.DgNATEEEILHYLEK.T	0.04000000000000.0	80
IPI00195173	Tax_Id=10116 Gene_Symbol=Cd59 CD59 glycoprotein precursor	37	55	K.TgNSTCSPNLDACLVAVSGK.Q	0.0400000000000000000.0	38
IPI00195241	Tax_Id=10116 Gene_Symbol=Apoh Beta-2-glycoprotein 1 precursor	110	125	K.TSVGgNSSFYQDTVVFK.C	0.0000400000000000.0	114
IPI00195241	Tax_Id=10116 Gene_Symbol=Apoh Beta-2-glycoprotein 1 precursor	203	213	K.TGgNWSALPSCK.A	0.00400000000.0	205
IPI00195241	Tax_Id=10116 Gene_Symbol=Apoh Beta-2-glycoprotein 1 precursor	49	75	R.YTTFEYPNTIGFACNPGYYLgNGTSSSK.C	0.000000000000000000004000000.0	69
IPI00195516	Tax_Id=10116 Gene_Symbol=Hpx Hemopexin precursor	180	192	R.SWPAVGgNCTAALR.W	0.0000004000000.0	186
IPI00195673	Tax_Id=10116 Gene_Symbol=Tubb6 Tubulin, beta 6	337	350	K.gNSSYFVEWIPNNVK.V	0.40000000000000.0	337
IPI00195673	Tax_Id=10116 Gene_Symbol=Tubb6 Tubulin, beta 6	337	350	K.gNSSYFVEWIPNNVK.V	0.40000000000400.0	337
IPI00195673	Tax_Id=10116 Gene_Symbol=Tubb6 Tubulin, beta 6	337	350	K.gNSSYFVEWIPNNVK.V	0.40000000004000.0	337
IPI00195673	Tax_Id=10116 Gene_Symbol=Tubb6 Tubulin, beta 6	363	379	K.MASTFIGgNSTAIQELFK.R	0.00000004000000000.0	370
IPI00195875	Tax_Id=10116 Gene_Symbol=Pom210 Nuclear pore membrane glycoprotein 210 precursor	388	412	R.IEAVFPAEFFEVLSSSQgNGSYHHVR.A	0.0000000000000000040000000.0	405
IPI00195931	Tax_Id=10116 Gene_Symbol=Tspan8 D6.1A protein	116	126	R.ILgNETLYENAK.L	0.00400000000.0	118
IPI00195931	Tax_Id=10116 Gene_Symbol=Tspan8 D6.1A protein	116	126	R.ILgNETLYENAK.L	0.00400000400.0	118
IPI00196226	Tax_Id=10116 Gene_Symbol=RGD1303130 Uncharacterized protein C1orf85 homolog precursor	126	152	R.LLEFDSTgNVSEGTQPPGKPYPPYSLAK.F	0.000000040000000000000000000.0	133
IPI00196226	Tax_Id=10116 Gene_Symbol=RGD1303130 Uncharacterized protein C1orf85 homolog precursor	173	191	R.GHPVDDPTGAFAgNGSLTFK.V	0.0000000000004000000.0	185
IPI00196499	Tax_Id=10116 Gene_Symbol=Elmo2 similar to Engulfment and cell motility protein 2	72	84	K.gNGTILQLAISPSR.A	0.4000000000000.0	72
IPI00196620	Tax_Id=10116 Gene_Symbol=Cubn Cubilin precursor	2073	2090	R.FTSDTSVAGTGFgNASFHK.S	0.000000000000400000.0	2085
IPI00196620	Tax_Id=10116 Gene_Symbol=Cubn Cubilin precursor	2393	2405	K.DFVEIWEgNHTSGR.V	0.0000000400000.0	2400
IPI00196620	Tax_Id=10116 Gene_Symbol=Cubn Cubilin precursor	2410	2429	R.YCGgNSTPSSVDTSSNVASVK.F	0.00040000000000000000.0	2413
IPI00196620	Tax_Id=10116 Gene_Symbol=Cubn Cubilin precursor	2530	2537	R.VgNVTNEFK.S	0.04000000.0	2531
IPI00196620	Tax_Id=10116 Gene_Symbol=Cubn Cubilin precursor	3034	3049	R.AITCGGIYgNESSGILR.S	0.0000000040000000.0	3042
IPI00196620	Tax_Id=10116 Gene_Symbol=Cubn Cubilin precursor	3123	3133	K.STgNSSLTLLFK.T	0.00400000000.0	3125
IPI00196620	Tax_Id=10116 Gene_Symbol=Cubn Cubilin precursor	3149	3178	R.ETIGPQQGCGGYLTEDgNQSFVSPDSDSNGR.Y	0.000000000000000040000000000000.0	3165
IPI00196620	Tax_Id=10116 Gene_Symbol=Cubn Cubilin precursor	3149	3178	R.ETIGPQQGCGGYLTEDgNQSFVSPDSDSNGR.Y	0.000000000000000040000000000400.0	3165
IPI00196620	Tax_Id=10116 Gene_Symbol=Cubn Cubilin precursor	3398	3407	R.EYgNQTFGNLK.S	0.0040000000.0	3400
IPI00196620	Tax_Id=10116 Gene_Symbol=Cubn Cubilin precursor	778	788	K.ICGgNETLFPIR.S	0.00040000000.0	781
IPI00196620	Tax_Id=10116 Gene_Symbol=Cubn Cubilin precursor	955	966	R.GVgNCTWHVVVQR.G	0.004000000000.0	957
IPI00196794	Tax_Id=10116 Gene_Symbol=Rab14 Ras-related protein Rab-14	111	125	R.gNLTNPNTVIILIGNK.A	0.400000000000000.0	111
IPI00196922	Tax_Id=10116 Gene_Symbol=Slc9a3r2 25 kDa protein	130	163	R.VVPTEDHVEGPLPSPVTgNGTSLAQLNGGSVCSSR.S	0.0000000000000000040000000000000000.0	147
IPI00196922	Tax_Id=10116 Gene_Symbol=Slc9a3r2 25 kDa protein	130	163	R.VVPTEDHVEGPLPSPVTgNGTSLAQLNGGSVCSSR.S	0.0000000000000000040000000400000000.0	147
IPI00197582	Tax_Id=10116 Gene_Symbol=Cd82 CD82 antigen	149	160	K.CCGWVSPSgNWTR.N	0.000000004000.0	157
IPI00197684	Tax_Id=10116 Gene_Symbol=Xpnpep2 Membrane-bound aminopeptidase P	35	53	R.DCSTNPPRLPVTAVgNTTMR.L	0.0000000000000040000.0	49
IPI00197684	Tax_Id=10116 Gene_Symbol=Xpnpep2 Membrane-bound aminopeptidase P	35	53	R.DCSTNPPRLPVTAVgNTTMR.L	0.0000000000000040010.0	49
IPI00197684	Tax_Id=10116 Gene_Symbol=Xpnpep2 Membrane-bound aminopeptidase P	406	435	R.RNEgNFSSGPSFETISASGLNAALAHYSPTK.E	0.000400000000000000000000000000.0	409
IPI00197684	Tax_Id=10116 Gene_Symbol=Xpnpep2 Membrane-bound aminopeptidase P	407	435	R.NEgNFSSGPSFETISASGLNAALAHYSPTK.E	0.00400000000000000000000000000.0	409
IPI00197684	Tax_Id=10116 Gene_Symbol=Xpnpep2 Membrane-bound aminopeptidase P	43	53	R.LPVTAVgNTTMR.L	0.00000040000.0	49
IPI00197684	Tax_Id=10116 Gene_Symbol=Xpnpep2 Membrane-bound aminopeptidase P	43	53	R.LPVTAVgNTTMR.L	0.00000040010.0	49
IPI00197684	Tax_Id=10116 Gene_Symbol=Xpnpep2 Membrane-bound aminopeptidase P	64	84	K.SgNLSAYIIPDTDAHMSEYIGK.H	0.040000000000000000000.0	65
IPI00198021	Tax_Id=10116 Gene_Symbol=Umod Uromodulin precursor	226	242	R.CNTAAPMWLgNGSHPSSR.E	0.00000000040000000.0	235
IPI00198021	Tax_Id=10116 Gene_Symbol=Umod Uromodulin precursor	322	335	K.QDFgNVTDVSLLEHR.L	0.00040000000000.0	325
IPI00198021	Tax_Id=10116 Gene_Symbol=Umod Uromodulin precursor	440	458	K.TSLQPMVSALgNISLGGTGK.F	0.0000000000400000000.0	450
IPI00198021	Tax_Id=10116 Gene_Symbol=Umod Uromodulin precursor	502	522	R.FVLLMTNCYATPSSgNSTDPVK.Y	0.000000000000004000000.0	516
IPI00198327	Tax_Id=10116 Gene_Symbol=Vdac2 Voltage-dependent anion-selective channel protein 2	187	209	R.TGDFQLHTNVNgNGTEFGGSIYQK.V	0.00000000000400000000000.0	198
IPI00198405	Tax_Id=10116 Gene_Symbol=Arsb Arylsulfatase B	156	186	R.GFDTYFGYLLGSEDYYTHEACAPIECLgNGTR.C	0.0000000000000000000000000004000.0	183
IPI00198405	Tax_Id=10116 Gene_Symbol=Arsb Arylsulfatase B	259	277	R.RIYAGMVSLLDEAVGgNVTK.A	0.0000000000000004000.0	274
IPI00198405	Tax_Id=10116 Gene_Symbol=Arsb Arylsulfatase B	260	277	R.IYAGMVSLLDEAVGgNVTK.A	0.000000000000004000.0	274
IPI00198667	Tax_Id=10116 Gene_Symbol=Clu Clusterin precursor	324	335	R.QELgNDSLQVAER.L	0.000400000000.0	327
IPI00198685	Tax_Id=10116 Gene_Symbol=Pak1 Serine/threonine-protein kinase PAK 1	471	488	R.ALYLIATgNGTPELQNPEK.L	0.000000040000000000.0	478
IPI00198717	Tax_Id=10116 Gene_Symbol=Mdh1 Malate dehydrogenase, cytoplasmic	180	199	K.NVIIWGgNHSSTQYPDVNHAK.V	0.00000040000000000000.0	186
IPI00199305	Tax_Id=10116 Gene_Symbol=Atp6v1b2 Vacuolar ATP synthase subunit B, brain isoform	131	163	R.VFgNGSGKPIDRGPVVLAEDFLDIMGQPINPQCR.I	0.004000000000000000000000000000000.0	133
IPI00199305	Tax_Id=10116 Gene_Symbol=Atp6v1b2 Vacuolar ATP synthase subunit B, brain isoform	345	381	R.gNGSITQIPILTMPNDDITHPIPDLTGYITEGQIYVDR.Q	0.4000000000000000000000000000000000000.0	345
IPI00199305	Tax_Id=10116 Gene_Symbol=Atp6v1b2 Vacuolar ATP synthase subunit B, brain isoform	345	381	R.gNGSITQIPILTMPNDDITHPIPDLTGYITEGQIYVDR.Q	0.4000000000010000000000000000000000000.0	345
IPI00199448	Tax_Id=10116 Gene_Symbol=Lgals3bp Mama	396	407	R.SLgNLTEDVYKPR.L	0.004000000000.0	398
IPI00199448	Tax_Id=10116 Gene_Symbol=Lgals3bp Mama	64	76	R.ALGYEgNATQALSR.A	0.0000040000000.0	69
IPI00199465	Tax_Id=10116 Gene_Symbol=Gls Glutaminase kidney isoform, mitochondrial precursor	643	668	K.ILQEYQVQYTPQGDSDDGKEgNQTVHK.N	0.00000000000000000000400000.0	663
IPI00199585	Tax_Id=10116 Gene_Symbol=Slc22a5 Organic cation/carnitine transporter 2	50	63	R.CLVPHTVgNLSSAWR.N	0.00000004000000.0	57
IPI00199585	Tax_Id=10116 Gene_Symbol=Slc22a5 Organic cation/carnitine transporter 2	86	101	R.LATIAgNFSALGLEPGR.D	0.0000040000000000.0	91
IPI00199607	Tax_Id=10116 Gene_Symbol=Ceacam1_v4;Ceacam1_v1;Ceacam1;Ceacam1_v3 carcinoembryonic antigen-related cell adhesion molecule isoform 2	368	378	R.MTLSQDgNSTLR.I	0.00000040000.0	374
IPI00199861	Tax_Id=10116 Gene_Symbol=Dcn Decorin precursor	202	227	R.ISDTgNITAIPQGLPTSISELHLDGNK.I	0.00004000000000000000000000.0	206
IPI00199867	Tax_Id=10116 Gene_Symbol=Emilin1_predicted elastin microfibril interfacer 1	450	459	K.LEVLLAgNVSR.E	0.0000004000.0	456
IPI00199867	Tax_Id=10116 Gene_Symbol=Emilin1_predicted elastin microfibril interfacer 1	561	578	R.LgNLTAAQLSQLEGLLQAR.G	0.040000000000000000.0	562
IPI00199867	Tax_Id=10116 Gene_Symbol=Emilin1_predicted elastin microfibril interfacer 1	765	779	R.ESgNSTSLTQAALLEK.L	0.004000000000000.0	767
IPI00199867	Tax_Id=10116 Gene_Symbol=Emilin1_predicted elastin microfibril interfacer 1	791	804	R.LGALgNSSLLLLEDR.L	0.00004000000000.0	795
IPI00200067	Tax_Id=10116 Gene_Symbol=F11r Junctional adhesion molecule A precursor	182	193	R.AFIgNSSYTIDPK.S	0.000400000000.0	185
IPI00200591	Tax_Id=10116 Gene_Symbol=LOC299282 Serine protease inhibitor A3L precursor	174	187	K.KLINDYVSgNQTQGK.I	0.00000000400000.0	182
IPI00200591	Tax_Id=10116 Gene_Symbol=LOC299282 Serine protease inhibitor A3L precursor	174	187	K.KLINDYVSgNQTQGK.I	0.00040000400000.0	182
IPI00200591	Tax_Id=10116 Gene_Symbol=LOC299282 Serine protease inhibitor A3L precursor	175	187	K.LINDYVSgNQTQGK.I	0.0000000400000.0	182
IPI00200591	Tax_Id=10116 Gene_Symbol=LOC299282 Serine protease inhibitor A3L precursor	175	187	K.LINDYVSgNQTQGK.I	0.0040000400000.0	182
IPI00200591	Tax_Id=10116 Gene_Symbol=LOC299282 Serine protease inhibitor A3L precursor	213	233	K.WKVPFNPgNDTFESEFYLDEKR.S	0.000000040000000000000.0	220
IPI00200591	Tax_Id=10116 Gene_Symbol=LOC299282 Serine protease inhibitor A3L precursor	215	232	K.VPFNPgNDTFESEFYLDEK.R	0.000004000000000000.0	220
IPI00200591	Tax_Id=10116 Gene_Symbol=LOC299282 Serine protease inhibitor A3L precursor	215	233	K.VPFNPgNDTFESEFYLDEKR.S	0.0000040000000000000.0	220
IPI00200591	Tax_Id=10116 Gene_Symbol=LOC299282 Serine protease inhibitor A3L precursor	264	279	K.YTGgNASALFILPDQGK.M	0.0004000000000000.0	267
IPI00200593	Tax_Id=10116 Gene_Symbol=Serpina3k Serine protease inhibitor A3K precursor	174	187	K.KFINDYVSgNQTQGK.I	0.00000000400000.0	182
IPI00200593	Tax_Id=10116 Gene_Symbol=Serpina3k Serine protease inhibitor A3K precursor	174	187	K.KFINDYVSgNQTQGK.I	0.00040000400000.0	182
IPI00200593	Tax_Id=10116 Gene_Symbol=Serpina3k Serine protease inhibitor A3K precursor	175	187	K.FINDYVSgNQTQGK.I	0.0000000400000.0	182
IPI00200593	Tax_Id=10116 Gene_Symbol=Serpina3k Serine protease inhibitor A3K precursor	175	187	K.FINDYVSgNQTQGK.I	0.0040000400000.0	182
IPI00200593	Tax_Id=10116 Gene_Symbol=Serpina3k Serine protease inhibitor A3K precursor	213	233	K.WKVPFNPgNDTFESEFYLDEKR.S	0.000000040000000000000.0	220
IPI00200593	Tax_Id=10116 Gene_Symbol=Serpina3k Serine protease inhibitor A3K precursor	215	232	K.VPFNPgNDTFESEFYLDEK.R	0.000004000000000000.0	220
IPI00200593	Tax_Id=10116 Gene_Symbol=Serpina3k Serine protease inhibitor A3K precursor	215	233	K.VPFNPgNDTFESEFYLDEKR.S	0.0000040000000000000.0	220
IPI00200593	Tax_Id=10116 Gene_Symbol=Serpina3k Serine protease inhibitor A3K precursor	264	279	K.YTGgNASALFILPDQGK.M	0.0004000000000000.0	267
IPI00200640	Tax_Id=10116 Gene_Symbol=Mucdhl Isoform 1 of Mucin and cadherin-like protein precursor	133	141	K.EYgNVSEDTR.V	0.004000000.0	135
IPI00200640	Tax_Id=10116 Gene_Symbol=Mucdhl Isoform 1 of Mucin and cadherin-like protein precursor	154	176	K.ATDADKDDILVYTLQEVTPgNASK.F	0.00000000000000000004000.0	173
IPI00200640	Tax_Id=10116 Gene_Symbol=Mucdhl Isoform 1 of Mucin and cadherin-like protein precursor	433	443	R.IEVEAgNNTVTK.D	0.00000400000.0	438
IPI00200757	Tax_Id=10116 Gene_Symbol=Fn1 Isoform 1 of Fibronectin precursor	516	533	R.DQCIVDDITYNVgNDTFHK.R	0.000000000000400000.0	528
IPI00200757	Tax_Id=10116 Gene_Symbol=Fn1 Isoform 1 of Fibronectin precursor	996	1010	K.LDAPTNLQFVgNETDR.T	0.000000000040000.0	1006
IPI00200898	Tax_Id=10116 Gene_Symbol=Slc9a3r1 Ezrin-radixin-moesin-binding phosphoprotein 50	302	329	K.RHDSTEPSSTSSSSDPILDFgNISLAVAK.E	0.0000000000000000000040000000.0	322
IPI00200998	Tax_Id=10116 Gene_Symbol=Pdzk1 PDZ domain-containing protein 1	172	199	K.AGVLADDHLIEVNGENVEgNASHEEVVEK.V	0.0000000000000000004000000000.0	190
IPI00200998	Tax_Id=10116 Gene_Symbol=Pdzk1 PDZ domain-containing protein 1	333	350	R.FSPLLYCQSQELPgNGSVK.E	0.000000000000040000.0	346
IPI00201083	Tax_Id=10116 Gene_Symbol=Fnbp1 Isoform 2 of Formin-binding protein 1	263	273	K.gNDSQLVVEAYK.S	0.40000000000.0	263
IPI00201120	Tax_Id=10116 Gene_Symbol=Slc5a2 Low affinity Na-dependent glucose transporter SGLT2 delta e trans	243	265	K.DPAVGgNISSTCYQPRPDSYHLLR.D	0.00000400000000000000000.0	248
IPI00201262	Tax_Id=10116 Gene_Symbol=LOC297568;Mug2;Mug1 Alpha-1-inhibitor 3 precursor	1127	1150	K.ALSCLESSWENIEQGGgNGSFVYTK.A	0.000000000000000040000000.0	1143
IPI00201262	Tax_Id=10116 Gene_Symbol=LOC297568;Mug2;Mug1 Alpha-1-inhibitor 3 precursor	290	308	R.LDNNGCSTQEVgNITEFQLK.E	0.0000000000040000000.0	301
IPI00201262	Tax_Id=10116 Gene_Symbol=LOC297568;Mug2;Mug1 Alpha-1-inhibitor 3 precursor	290	308	R.LDNNGCSTQEVgNITEFQLK.E	0.0004000000040000000.0	301
IPI00201262	Tax_Id=10116 Gene_Symbol=LOC297568;Mug2;Mug1 Alpha-1-inhibitor 3 precursor	388	404	R.DAGYTgNATTTDQHGLAK.F	0.00000400000000000.0	393
IPI00201262	Tax_Id=10116 Gene_Symbol=LOC297568;Mug2;Mug1 Alpha-1-inhibitor 3 precursor	867	880	K.SLGNVgNFSVSAEAR.Q	0.00000400000000.0	872
IPI00201262	Tax_Id=10116 Gene_Symbol=LOC297568;Mug2;Mug1 Alpha-1-inhibitor 3 precursor	992	1002	K.YLgNETQQLTEK.I	0.00400000000.0	994
IPI00201410	Tax_Id=10116 Gene_Symbol=Ppp3ca Isoform 1 of Serine/threonine-protein phosphatase 2B catalytic subunit alpha isoform	502	521	K.ALASETNGTDSgNGSNSSNIQ.-	0.00000000000400000000.0	513
IPI00201410	Tax_Id=10116 Gene_Symbol=Ppp3ca Isoform 1 of Serine/threonine-protein phosphatase 2B catalytic subunit alpha isoform	502	521	K.ALASETgNGTDSNGSNSSNIQ.-	0.00000040000000000400.0	508
IPI00201410	Tax_Id=10116 Gene_Symbol=Ppp3ca Isoform 1 of Serine/threonine-protein phosphatase 2B catalytic subunit alpha isoform	502	521	K.ALASETgNGTDSgNGSNSSNIQ.-	0.00000040000400000000.0	508513
IPI00201489	Tax_Id=10116 Gene_Symbol=Ppif Peptidyl-prolyl cis-trans isomerase, mitochondrial precursor	133	159	K.HVGPGVLSMANAGPNTgNGSQFFICTIK.T	0.000000000000000040000000000.0	149
IPI00201617	Tax_Id=10116 Gene_Symbol=LOC259244;Obp3 Alpha-2u globulin	49	58	R.EKIEEgNGSMR.V	0.0000040000.0	54
IPI00203102	Tax_Id=10116 Gene_Symbol=Ptgds Prostaglandin-H2 D-isomerase precursor	43	56	R.WYSAGLASgNSSWFR.E	0.00000000400000.0	51
IPI00203176	Tax_Id=10116 Gene_Symbol=Tpcn1 Two pore calcium channel protein 1	594	609	R.LSPNCCgNSSTVADAYR.F	0.0000004000000000.0	600
IPI00203384	Tax_Id=10116 Gene_Symbol=Klkb1 Plasma kallikrein precursor	447	460	R.IYGGILgNLSEITNK.T	0.00000040000000.0	453
IPI00203529	Tax_Id=10116 Gene_Symbol=Slc34a3 Sodium-dependent phosphate transport protein 2C	279	308	R.GETPQGSSEECDLSGSCTERgNSSASPGEDR.L	0.000000000000000000004000000000.0	299
IPI00203610	Tax_Id=10116 Gene_Symbol=Tor1aip1 59 kDa protein	336	362	K.HLgNSSLPRPQPAILLLTAAQDAAEVLK.C	0.004000000000000000000000000.0	338
IPI00204006	Tax_Id=10116 Gene_Symbol=Fbn1 Fibrillin-1	1570	1587	K.AWGTPCELCPPVgNTSEYK.I	0.000000000000400000.0	1582
IPI00204006	Tax_Id=10116 Gene_Symbol=Fbn1 Fibrillin-1	445	458	K.VLPFgNVTDYCQLVR.Y	0.00004000000000.0	449
IPI00204348	Tax_Id=10116 Gene_Symbol=Nt5e 5~-nucleotidase precursor	294	317	K.VEFDDKGNVVTSYGNPILLgNSTIR.E	0.000000000000000000040000.0	313
IPI00204348	Tax_Id=10116 Gene_Symbol=Nt5e 5~-nucleotidase precursor	331	343	R.IKLDgNYSTQELGR.T	0.0000400000000.0	335
IPI00204348	Tax_Id=10116 Gene_Symbol=Nt5e 5~-nucleotidase precursor	333	343	K.LDgNYSTQELGR.T	0.00400000000.0	335
IPI00204348	Tax_Id=10116 Gene_Symbol=Nt5e 5~-nucleotidase precursor	344	356	R.TIVYLgNGSAQECR.F	0.0000040000000.0	349
IPI00204442	Tax_Id=10116 Gene_Symbol=Bmp15 Growth differentiation factor-9B	211	218	K.GgNETLELR.W	0.04000000.0	212
IPI00204451	Tax_Id=10116 Gene_Symbol=Cfi Complement factor I precursor	507	518	R.WGEVDLIGgNCSR.F	0.000000004000.0	515
IPI00204467	Tax_Id=10116 Gene_Symbol=Sult1c2 Sulfotransferase 1C2	13	36	K.LKEVAGIPLQAPTVDgNWSQIQTFK.A	0.000000000000000400000000.0	28
IPI00204469	Tax_Id=10116 Gene_Symbol=Sult1c2a Sulfotransferase 1C2A	13	36	K.LKEVAGIPLMDPTVNgNWSQIQTFK.A	0.000000000000000400000000.0	28
IPI00204469	Tax_Id=10116 Gene_Symbol=Sult1c2a Sulfotransferase 1C2A	15	36	K.EVAGIPLMDPTVNgNWSQIQTFK.A	0.0000000000000400000000.0	28
IPI00204504	Tax_Id=10116 Gene_Symbol=Plvap Plasmalemma vesicle-associated protein	66	85	R.ADNLYSQVVGLSAAQAgNLSK.Q	0.00000000000000004000.0	82
IPI00204504	Tax_Id=10116 Gene_Symbol=Plvap Plasmalemma vesicle-associated protein	86	94	K.QLgNISTLVK.D	0.004000000.0	88
IPI00204772	Tax_Id=10116 Gene_Symbol=Prpf19 Pre-mRNA-processing factor 19	33	56	K.YIAEgNGTDPINNQPLSEEQLIDIK.V	0.000040000000000000000000.0	37
IPI00204774	Tax_Id=10116 Gene_Symbol=Ces1 Liver carboxylesterase B-1 precursor	79	93	K.gNTTTYPPMCSQDATK.G	0.400000000000000.0	79
IPI00204776	Tax_Id=10116 Gene_Symbol=Akap8 A-kinase anchor protein 8	163	180	R.gNGSFGGTFNDCRDPTPER.G	0.400000000000000000.0	163
IPI00204808	Tax_Id=10116 Gene_Symbol=Mep1b Meprin A subunit beta precursor	186	214	K.EHNFNIYgNDSVSDSLNVPYDYTSVMHYSK.T	0.00000004000000000000000000000.0	193
IPI00204808	Tax_Id=10116 Gene_Symbol=Mep1b Meprin A subunit beta precursor	215	228	K.TAFQgNGTESTIITK.I	0.00004000000000.0	219
IPI00204808	Tax_Id=10116 Gene_Symbol=Mep1b Meprin A subunit beta precursor	539	553	K.VGVEAFFPgNGTQFSR.G	0.000000004000000.0	547
IPI00205018	Tax_Id=10116 Gene_Symbol=Aldh6a1 Methylmalonate-semialdehyde dehydrogenase [acylating], mitochondrial precursor	439	460	K.IVNDNPYGgNGTAIFTTNGAIAR.K	0.0000000040000000000000.0	447
IPI00205018	Tax_Id=10116 Gene_Symbol=Aldh6a1 Methylmalonate-semialdehyde dehydrogenase [acylating], mitochondrial precursor	439	460	K.IVNDNPYGgNGTAIFTTNGAIAR.K	0.0000000040000000400000.0	447
IPI00205018	Tax_Id=10116 Gene_Symbol=Aldh6a1 Methylmalonate-semialdehyde dehydrogenase [acylating], mitochondrial precursor	439	460	K.IVNDNPYGgNGTAIFTTNGAIAR.K	0.0000400040000000400000.0	447
IPI00205018	Tax_Id=10116 Gene_Symbol=Aldh6a1 Methylmalonate-semialdehyde dehydrogenase [acylating], mitochondrial precursor	439	460	K.IVNDNPYGgNGTAIFTTNGAIAR.K	0.0040000040000000400000.0	447
IPI00205155	Tax_Id=10116 Gene_Symbol=Ces1 Carboxylesterase RL1	79	93	K.gNTTTYPPMCSQDATK.G	0.400000000000000.0	79
IPI00205166	Tax_Id=10116 Gene_Symbol=Itga6 similar to integrin alpha 6 isoform 2	923	933	K.YQTLgNCSVNVR.C	0.00004000000.0	927
IPI00205203	Tax_Id=10116 Gene_Symbol=Olr79 olfactory receptor Olr79	2	12	M.SVIgNDSSLYPR.F	0.00040000000.0	5
IPI00205325	Tax_Id=10116 Gene_Symbol=Lrp2 Low-density lipoprotein receptor-related protein 2 precursor	1162	1194	R.CISPLYVCDGDKDCADGSDEAGCVLgNCTSAQFK.C	0.000000000000000000000000040000000.0	1187
IPI00205325	Tax_Id=10116 Gene_Symbol=Lrp2 Low-density lipoprotein receptor-related protein 2 precursor	141	163	R.NCHYPTCDQLTCANGACYgNTSQR.C	0.00000000000000000040000.0	159
IPI00205325	Tax_Id=10116 Gene_Symbol=Lrp2 Low-density lipoprotein receptor-related protein 2 precursor	141	163	R.NCHYPTCDQLTCANGACYgNTSQR.C	0.00000000000004000040000.0	159
IPI00205325	Tax_Id=10116 Gene_Symbol=Lrp2 Low-density lipoprotein receptor-related protein 2 precursor	141	163	R.NCHYPTCDQLTCANGACYgNTSQR.C	0.40000000000000000040000.0	159
IPI00205325	Tax_Id=10116 Gene_Symbol=Lrp2 Low-density lipoprotein receptor-related protein 2 precursor	141	163	R.NCHYPTCDQLTCANGACYgNTSQR.C	0.40000000000004000040000.0	159
IPI00205325	Tax_Id=10116 Gene_Symbol=Lrp2 Low-density lipoprotein receptor-related protein 2 precursor	1491	1501	K.TWSVFQgNGTDK.R	0.00000040000.0	1497
IPI00205325	Tax_Id=10116 Gene_Symbol=Lrp2 Low-density lipoprotein receptor-related protein 2 precursor	1491	1502	K.TWSVFQgNGTDKR.V	0.000000400000.0	1497
IPI00205325	Tax_Id=10116 Gene_Symbol=Lrp2 Low-density lipoprotein receptor-related protein 2 precursor	172	186	R.DSSDEAgNCTTLCSQK.E	0.000000400000000.0	178
IPI00205325	Tax_Id=10116 Gene_Symbol=Lrp2 Low-density lipoprotein receptor-related protein 2 precursor	172	198	R.DSSDEAgNCTTLCSQKEFECGSGECILR.A	0.000000400000000000000000000.0	178
IPI00205325	Tax_Id=10116 Gene_Symbol=Lrp2 Low-density lipoprotein receptor-related protein 2 precursor	1723	1743	R.HYSCACPSGWgNLSDDSVNCVR.G	0.000000000040000000000.0	1733
IPI00205325	Tax_Id=10116 Gene_Symbol=Lrp2 Low-density lipoprotein receptor-related protein 2 precursor	2382	2400	K.SCATSQEDFLIYSLgNNSLR.S	0.0000000000000040000.0	2396
IPI00205325	Tax_Id=10116 Gene_Symbol=Lrp2 Low-density lipoprotein receptor-related protein 2 precursor	2480	2501	R.RIYYSDFSgNQTINSMAEDGSNR.A	0.0000000040000000000000.0	2488
IPI00205325	Tax_Id=10116 Gene_Symbol=Lrp2 Low-density lipoprotein receptor-related protein 2 precursor	2481	2501	R.IYYSDFSgNQTINSMAEDGSNR.A	0.000000040000000000000.0	2488
IPI00205325	Tax_Id=10116 Gene_Symbol=Lrp2 Low-density lipoprotein receptor-related protein 2 precursor	2481	2501	R.IYYSDFSgNQTINSMAEDGSNR.A	0.000000040000010000000.0	2488
IPI00205325	Tax_Id=10116 Gene_Symbol=Lrp2 Low-density lipoprotein receptor-related protein 2 precursor	278	304	R.CISIDKVCDGVPDCPEGDDENgNVTSGR.T	0.000000000000000000000400000.0	299
IPI00205325	Tax_Id=10116 Gene_Symbol=Lrp2 Low-density lipoprotein receptor-related protein 2 precursor	278	304	R.CISIDKVCDGVPDCPEGDDENgNVTSGR.T	0.000000000000000000004400000.0	299
IPI00205325	Tax_Id=10116 Gene_Symbol=Lrp2 Low-density lipoprotein receptor-related protein 2 precursor	2780	2793	R.NCgNSTTEFTCSNGR.C	0.00400000000000.0	2782
IPI00205325	Tax_Id=10116 Gene_Symbol=Lrp2 Low-density lipoprotein receptor-related protein 2 precursor	2780	2793	R.NCgNSTTEFTCSNGR.C	0.00400000000400.0	2782
IPI00205325	Tax_Id=10116 Gene_Symbol=Lrp2 Low-density lipoprotein receptor-related protein 2 precursor	2780	2793	R.NCgNSTTEFTCSNGR.C	0.40400000000000.0	2782
IPI00205325	Tax_Id=10116 Gene_Symbol=Lrp2 Low-density lipoprotein receptor-related protein 2 precursor	2780	2793	R.NCgNSTTEFTCSNGR.C	0.40400000000400.0	2782
IPI00205325	Tax_Id=10116 Gene_Symbol=Lrp2 Low-density lipoprotein receptor-related protein 2 precursor	284	304	K.VCDGVPDCPEGDDENgNVTSGR.T	0.000000000000000400000.0	299
IPI00205325	Tax_Id=10116 Gene_Symbol=Lrp2 Low-density lipoprotein receptor-related protein 2 precursor	284	304	K.VCDGVPDCPEGDDENgNVTSGR.T	0.000000000000004400000.0	299
IPI00205325	Tax_Id=10116 Gene_Symbol=Lrp2 Low-density lipoprotein receptor-related protein 2 precursor	2967	2993	R.CIPQYWVCDGDADCSDALDELQgNCTMR.T	0.000000000000000000000040000.0	2989
IPI00205325	Tax_Id=10116 Gene_Symbol=Lrp2 Low-density lipoprotein receptor-related protein 2 precursor	2967	2993	R.CIPQYWVCDGDADCSDALDELQgNCTMR.T	0.000000000000000000000040010.0	2989
IPI00205325	Tax_Id=10116 Gene_Symbol=Lrp2 Low-density lipoprotein receptor-related protein 2 precursor	305	343	R.TCGMGVCSVLNCEYQCHQTPFGGECFCPPGHIINSgNDSR.T	0.000000000000000000000000000000000004000.0	340
IPI00205325	Tax_Id=10116 Gene_Symbol=Lrp2 Low-density lipoprotein receptor-related protein 2 precursor	3307	3326	R.KMIAQHCVDAgNNTFCFEHPR.G	0.00000000004000000000.0	3317
IPI00205325	Tax_Id=10116 Gene_Symbol=Lrp2 Low-density lipoprotein receptor-related protein 2 precursor	3308	3326	K.MIAQHCVDAgNNTFCFEHPR.G	0.0000000004000000000.0	3317
IPI00205325	Tax_Id=10116 Gene_Symbol=Lrp2 Low-density lipoprotein receptor-related protein 2 precursor	3308	3326	K.MIAQHCVDAgNNTFCFEHPR.G	0.1000000004000000000.0	3317
IPI00205325	Tax_Id=10116 Gene_Symbol=Lrp2 Low-density lipoprotein receptor-related protein 2 precursor	3444	3463	R.VVLVgNTTHKPFDIHVYHPYR.Q	0.00004000000000000000.0	3448
IPI00205325	Tax_Id=10116 Gene_Symbol=Lrp2 Low-density lipoprotein receptor-related protein 2 precursor	3564	3577	R.DGgNCTSPQALCNAR.Q	0.00400000000000.0	3566
IPI00205325	Tax_Id=10116 Gene_Symbol=Lrp2 Low-density lipoprotein receptor-related protein 2 precursor	3564	3577	R.DGgNCTSPQALCNAR.Q	0.00400000000400.0	3566
IPI00205325	Tax_Id=10116 Gene_Symbol=Lrp2 Low-density lipoprotein receptor-related protein 2 precursor	3971	4004	R.TCAENICEQgNCTQLSSGGFICSCRPGFKPSTSDK.N	0.0000000004000000000000000000000000.0	3980
IPI00205325	Tax_Id=10116 Gene_Symbol=Lrp2 Low-density lipoprotein receptor-related protein 2 precursor	4328	4337	R.YgNQSVSNPCK.Q	0.0400000000.0	4329
IPI00205325	Tax_Id=10116 Gene_Symbol=Lrp2 Low-density lipoprotein receptor-related protein 2 precursor	447	479	K.VFSTDINGLNTQEILgNVSVDTPENLAVDWINNK.L	0.000000000000000400000000000000000.0	462
IPI00205325	Tax_Id=10116 Gene_Symbol=Lrp2 Low-density lipoprotein receptor-related protein 2 precursor	655	678	R.QPgNATNPCGSNNGGCAQVCVLSHR.T	0.004000000000000000000000.0	657
IPI00205325	Tax_Id=10116 Gene_Symbol=Lrp2 Low-density lipoprotein receptor-related protein 2 precursor	655	678	R.QPgNATNPCGSNNGGCAQVCVLSHR.T	0.004000000004000000000000.0	657
IPI00205325	Tax_Id=10116 Gene_Symbol=Lrp2 Low-density lipoprotein receptor-related protein 2 precursor	853	882	R.AWSDGSHLMPIVgNTSLGWPNGLAIDWSASR.L	0.000000000000400000000000000000.0	865
IPI00205325	Tax_Id=10116 Gene_Symbol=Lrp2 Low-density lipoprotein receptor-related protein 2 precursor	853	882	R.AWSDGSHLMPIVgNTSLGWPNGLAIDWSASR.L	0.000000000000400000040000000000.0	865
IPI00205374	Tax_Id=10116 Gene_Symbol=Hmgcl Hydroxymethylglutaryl-CoA lyase, mitochondrial precursor	138	149	K.NVgNCSIEESFQR.F	0.004000000000.0	140
IPI00205668	Tax_Id=10116 Gene_Symbol=Nphs1 Isoform 1 of Nephrin precursor	712	725	R.ILSGGALQLWgNVTR.A	0.00000000004000.0	722
IPI00205693	Tax_Id=10116 Gene_Symbol=Atp1a2 Sodium/potassium-transporting ATPase subunit alpha-2 precursor	211	225	K.VDgNSSLTGESEPQTR.S	0.004000000000000.0	213
IPI00205693	Tax_Id=10116 Gene_Symbol=Atp1a2 Sodium/potassium-transporting ATPase subunit alpha-2 precursor	627	644	K.GVGIISEGgNETVEDIAAR.L	0.000000004000000000.0	635
IPI00205693	Tax_Id=10116 Gene_Symbol=Atp1a2 Sodium/potassium-transporting ATPase subunit alpha-2 precursor	705	723	R.QGAIVAVTGDGVgNDSPALK.K	0.0000000000004000000.0	717
IPI00205693	Tax_Id=10116 Gene_Symbol=Atp1a2 Sodium/potassium-transporting ATPase subunit alpha-2 precursor	705	724	R.QGAIVAVTGDGVgNDSPALKK.A	0.00000000000040000000.0	717
IPI00205999	Tax_Id=10116 Gene_Symbol=Sh3kbp1 Isoform 2 of SH3 domain-containing kinase-binding protein 1	177	208	R.ETTGSESDGGDSSSTKSEGAgNGTVATAAIQPK.K	0.00000000000000000000400000000000.0	197
IPI00206188	Tax_Id=10116 Gene_Symbol=Alcam CD166 antigen precursor	161	172	R.DSYPDGgNITWYR.N	0.000000400000.0	167
IPI00206188	Tax_Id=10116 Gene_Symbol=Alcam CD166 antigen precursor	473	493	K.IIISPEEgNVTLTCTAENQLER.T	0.000000040000000000000.0	480
IPI00206254	Tax_Id=10116 Gene_Symbol=Ggt1 Gamma-glutamyltranspeptidase 1 precursor	112	122	R.LAgNTSMFgNNSK.D	0.00400004000.0	114119
IPI00206254	Tax_Id=10116 Gene_Symbol=Ggt1 Gamma-glutamyltranspeptidase 1 precursor	112	122	R.LAgNTSMFgNNSK.D	0.00400104000.0	114119
IPI00206254	Tax_Id=10116 Gene_Symbol=Ggt1 Gamma-glutamyltranspeptidase 1 precursor	112	138	R.LANTSMFgNNSKDSEEGGLSVAVPGEIR.G	0.000000040000000000000000000.0	119
IPI00206254	Tax_Id=10116 Gene_Symbol=Ggt1 Gamma-glutamyltranspeptidase 1 precursor	112	138	R.LANTSMFgNNSKDSEEGGLSVAVPGEIR.G	0.000000044000000000000000000.0	119
IPI00206254	Tax_Id=10116 Gene_Symbol=Ggt1 Gamma-glutamyltranspeptidase 1 precursor	112	138	R.LANTSMFgNNSKDSEEGGLSVAVPGEIR.G	0.000001044000000000000000000.0	119
IPI00206254	Tax_Id=10116 Gene_Symbol=Ggt1 Gamma-glutamyltranspeptidase 1 precursor	112	138	R.LAgNTSMFNNSKDSEEGGLSVAVPGEIR.G	0.004000004000000000000000000.0	114
IPI00206254	Tax_Id=10116 Gene_Symbol=Ggt1 Gamma-glutamyltranspeptidase 1 precursor	112	138	R.LAgNTSMFNNSKDSEEGGLSVAVPGEIR.G	0.004001004000000000000000000.0	114
IPI00206254	Tax_Id=10116 Gene_Symbol=Ggt1 Gamma-glutamyltranspeptidase 1 precursor	112	138	R.LAgNTSMFgNNSKDSEEGGLSVAVPGEIR.G	0.004000040000000000000000000.0	114119
IPI00206254	Tax_Id=10116 Gene_Symbol=Ggt1 Gamma-glutamyltranspeptidase 1 precursor	112	138	R.LAgNTSMFgNNSKDSEEGGLSVAVPGEIR.G	0.004000044000000000000000000.0	114119
IPI00206254	Tax_Id=10116 Gene_Symbol=Ggt1 Gamma-glutamyltranspeptidase 1 precursor	112	138	R.LAgNTSMFgNNSKDSEEGGLSVAVPGEIR.G	0.004001040000000000000000000.0	114119
IPI00206254	Tax_Id=10116 Gene_Symbol=Ggt1 Gamma-glutamyltranspeptidase 1 precursor	226	238	R.AFYgNGSLTAQIVK.D	0.0004000000000.0	229
IPI00206254	Tax_Id=10116 Gene_Symbol=Ggt1 Gamma-glutamyltranspeptidase 1 precursor	411	446	R.VSGILFNDEMDDFSSPgNFTNQFGVAPSPANFIKPGK.Q	0.000000000000000040000000000000000000.0	427
IPI00206254	Tax_Id=10116 Gene_Symbol=Ggt1 Gamma-glutamyltranspeptidase 1 precursor	411	446	R.VSGILFNDEMDDFSSPgNFTNQFGVAPSPANFIKPGK.Q	0.000000000100000040000000000000000000.0	427
IPI00206254	Tax_Id=10116 Gene_Symbol=Ggt1 Gamma-glutamyltranspeptidase 1 precursor	503	516	R.LHNQLLPgNTTTVEK.N	0.00000004000000.0	510
IPI00206254	Tax_Id=10116 Gene_Symbol=Ggt1 Gamma-glutamyltranspeptidase 1 precursor	503	516	R.LHNQLLPgNTTTVEK.N	0.00400004000000.0	510
IPI00206268	Tax_Id=10116 Gene_Symbol=- 32 kDa protein	187	209	R.TGDFQLHTNVNgNGTEFGGSIYQK.K	0.00000000000400000000000.0	198
IPI00206268	Tax_Id=10116 Gene_Symbol=- 32 kDa protein	88	109	K.WNTgNNTLGTEIAIENQICQGLK.L	0.0004000000000040000000.0	91
IPI00206298	Tax_Id=10116 Gene_Symbol=Lgmn Legumain precursor	61	99	R.NGIPDEQIIVMMYDDIANNEENPTPGVVINRPgNGTDVYK.G	0.000000000000000000000000000000004000000.0	93
IPI00206298	Tax_Id=10116 Gene_Symbol=Lgmn Legumain precursor	61	99	R.NGIPDEQIIVMMYDDIANNEENPTPGVVINRPgNGTDVYK.G	0.400000000000000004000000000000004000000.0	93
IPI00206336	Tax_Id=10116 Gene_Symbol=Lamp1 Lysosome-associated membrane glycoprotein 1 precursor	57	70	K.VSgNMTLPASAEVLK.N	0.00400000000000.0	59
IPI00206336	Tax_Id=10116 Gene_Symbol=Lamp1 Lysosome-associated membrane glycoprotein 1 precursor	57	70	K.VSgNMTLPASAEVLK.N	0.00410000000000.0	59
IPI00206336	Tax_Id=10116 Gene_Symbol=Lamp1 Lysosome-associated membrane glycoprotein 1 precursor	57	78	K.VSgNMTLPASAEVLKgNSSSCGEK.N	0.0040000000000040000000.0	59,71
IPI00206403	Tax_Id=10116 Gene_Symbol=Lum Lumican precursor	120	137	K.KLHINYNgNLTESVGPLPK.S	0.000000040000000000.0	127
IPI00206403	Tax_Id=10116 Gene_Symbol=Lum Lumican precursor	85	106	K.AFEgNVTDLQWLILDHNLLENSK.I	0.0004000000000000000000.0	88
IPI00206434	Tax_Id=10116 Gene_Symbol=Lnpep Leucyl-cystinyl aminopeptidase	144	159	K.TgNQSAELIQPIATNGK.V	0.0400000000000400.0	145
IPI00206467	Tax_Id=10116 Gene_Symbol=Pecam Platelet endothelial cell adhesion molecule precursor	351	363	K.EETVLSQYQgNFSK.I	0.0000000004000.0	360
IPI00206467	Tax_Id=10116 Gene_Symbol=Pecam Platelet endothelial cell adhesion molecule precursor	413	432	K.GQIIGISCQSVgNGTAPITYR.L	0.00000000000400000000.0	424
IPI00206668	Tax_Id=10116 Gene_Symbol=Entpd1 Ectonucleoside triphosphate diphosphohydrolase 1	289	302	K.VVgNVSELYGTPCTK.R	0.00400000000000.0	291
IPI00206823	Tax_Id=10116 Gene_Symbol=Obp3 Alpha-2u globulin	49	58	R.EKIEEgNGSMR.V	0.0000040000.0	54
IPI00207123	Tax_Id=10116 Gene_Symbol=Tnc Tenascin (Fragment)	331	344	R.LLQTAEHgNISGAER.T	0.00000004000000.0	338
IPI00207180	Tax_Id=10116 Gene_Symbol=Slc6a18 Sodium- and chloride-dependent transporter XTRP2	343	359	R.DEYPSVLMYLgNATQPER.V	0.00000000004000000.0	353
IPI00207217	Tax_Id=10116 Gene_Symbol=Echs1 Enoyl-CoA hydratase, mitochondrial precursor	44	56	K.gNSSVGLIQLNRPK.A	0.4000000000000.0	44
IPI00207480	Tax_Id=10116 Gene_Symbol=RGD1565180_predicted hypothetical protein LOC363158	358	371	R.LEAVQFFgNVTTLQK.E	0.00000004000000.0	365
IPI00207702	Tax_Id=10116 Gene_Symbol=Slc22a8 Solute carrier family 22 member 8	91	105	R.ATEPCLDGWIYgNSTR.D	0.000000000004000.0	102
IPI00208205	Tax_Id=10116 Gene_Symbol=Hspa8 Heat shock cognate 71 kDa protein	138	155	K.TVTNAVVTVPAYFgNDSQR.Q	0.000000000000040000.0	151
IPI00208215	Tax_Id=10116 Gene_Symbol=Prdx3 Thioredoxin-dependent peroxide reductase, mitochondrial precursor	151	167	K.NGGLGHMgNITLLSDLTK.Q	0.00000004000000000.0	158
IPI00208215	Tax_Id=10116 Gene_Symbol=Prdx3 Thioredoxin-dependent peroxide reductase, mitochondrial precursor	151	167	K.NGGLGHMgNITLLSDLTK.Q	0.00000014000000000.0	158
IPI00208215	Tax_Id=10116 Gene_Symbol=Prdx3 Thioredoxin-dependent peroxide reductase, mitochondrial precursor	219	249	K.AFQFVETHGEVCPAgNWTPESPTIKPSPTASK.E	0.0000000000000040000000000000000.0	233
IPI00208382	Tax_Id=10116 Gene_Symbol=Ppt1 Palmitoyl-protein thioesterase 1 precursor	230	248	K.FFgNDSIVDPVDSEWFGFYR.S	0.0040000000000000000.0	232
IPI00208659	Tax_Id=10116 Gene_Symbol=Cfh Complement inhibitory factor H	1051	1068	K.DNSCVNPPHVPgNATILTR.H	0.000000000004000000.0	1062
IPI00208917	Tax_Id=10116 Gene_Symbol=Aldh7a1 similar to aldehyde dehydrogenase family 7, member A1	49	62	R.EDNEGVFgNGSWGGR.G	0.00000004000000.0	56
IPI00209258	Tax_Id=10116 Gene_Symbol=Spna2 Spectrin alpha chain, brain	2018	2047	K.QETFDAGLQAFQQEGIAgNITALKDQLLAAK.H	0.000000000000000004000000000000.0	2035
IPI00209258	Tax_Id=10116 Gene_Symbol=Spna2 Spectrin alpha chain, brain	2317	2327	R.gNTTGVTEEALK.E	0.40000000000.0	2317
IPI00209258	Tax_Id=10116 Gene_Symbol=Spna2 Spectrin alpha chain, brain	614	627	K.HQAFEAELSAgNQSR.I	0.00000000004000.0	624
IPI00209975	Tax_Id=10116 Gene_Symbol=C4bpb C4b-binding protein beta chain precursor	88	99	K.IgNSSGPVgNISGK.I	0.040000040000.0	89,95
IPI00210090	Tax_Id=10116 Gene_Symbol=Hnrpu SP120	38	68	R.LQAALDNEAGGRPAMEPGgNGSLDLGGDAAGR.S	0.0000000000000000004000000000000.0	56
IPI00210090	Tax_Id=10116 Gene_Symbol=Hnrpu SP120	38	68	R.LQAALDNEAGGRPAMEPGgNGSLDLGGDAAGR.S	0.0000000000000010004000000000000.0	56
IPI00210381	Tax_Id=10116 Gene_Symbol=Rab11b Ras-related protein Rab-11B	146	166	K.NgNLSFIETSALDSTNVEEAFK.N	0.040000000000000000000.0	147
IPI00210435	Tax_Id=10116 Gene_Symbol=Pc Pyruvate carboxylase, mitochondrial precursor	407	428	R.LDgNASAFQGAVISPHYDSLLVK.V	0.0040000000000000000000.0	409
IPI00210824	Tax_Id=10116 Gene_Symbol=Serpina6 Corticosteroid-binding globulin precursor	210	222	R.EEDFYVgNETSTVK.V	0.0000004000000.0	216
IPI00210824	Tax_Id=10116 Gene_Symbol=Serpina6 Corticosteroid-binding globulin precursor	315	328	K.DLLTgNQSDFSGNTK.D	0.00004000000000.0	319
IPI00210872	Tax_Id=10116 Gene_Symbol=Mep1a Meprin A subunit alpha precursor	535	552	K.YQTSSAIgNGSVIWDRPTK.V	0.000000040000000000.0	542
IPI00210900	Tax_Id=10116 Gene_Symbol=Ambp AMBP protein precursor	226	245	K.KEDSCQLgNYSEGPCLGMQQK.Y	0.00000004000000000000.0	233
IPI00210900	Tax_Id=10116 Gene_Symbol=Ambp AMBP protein precursor	226	245	K.KEDSCQLgNYSEGPCLGMQQK.Y	0.00000004000000001000.0	233
IPI00210900	Tax_Id=10116 Gene_Symbol=Ambp AMBP protein precursor	227	245	K.EDSCQLgNYSEGPCLGMQQK.Y	0.0000004000000000000.0	233
IPI00210975	Tax_Id=10116 Gene_Symbol=Hyou1 Hypoxia up-regulated protein 1 precursor	510	520	R.VFGSQgNLTTVK.L	0.00000400000.0	515
IPI00210975	Tax_Id=10116 Gene_Symbol=Hyou1 Hypoxia up-regulated protein 1 precursor	822	837	R.LSALDNLLgNHSSIFLK.G	0.0000000040000000.0	830
IPI00210975	Tax_Id=10116 Gene_Symbol=Hyou1 Hypoxia up-regulated protein 1 precursor	926	940	R.TEPPLgNASAGDQEEK.V	0.000004000000000.0	931
IPI00211023	Tax_Id=10116 Gene_Symbol=Slc12a4 Solute carrier family 12 member 4	328	339	K.TVVVDgNETVATR.L	0.000004000000.0	333
IPI00211075	Tax_Id=10116 Gene_Symbol=Serpina3n Serine protease inhibitor A3N precursor	103	115	K.FgNLTETPETEIHR.G	0.0400000000000.0	104
IPI00211075	Tax_Id=10116 Gene_Symbol=Serpina3n Serine protease inhibitor A3N precursor	244	265	K.LEDLTTPYVRDEELgNCTVVELK.Y	0.0000000000000040000000.0	258
IPI00211075	Tax_Id=10116 Gene_Symbol=Serpina3n Serine protease inhibitor A3N precursor	254	265	R.DEELgNCTVVELK.Y	0.000040000000.0	258
IPI00211075	Tax_Id=10116 Gene_Symbol=Serpina3n Serine protease inhibitor A3N precursor	266	281	K.YTGgNASALFILPDQGK.M	0.0004000000000000.0	269
IPI00211096	Tax_Id=10116 Gene_Symbol=Hsd11b1 Isoform 11-HSD1A of Corticosteroid 11-beta-dehydrogenase isozyme 1	156	170	K.QSgNGSIAIISSMAGK.M	0.004000000000000.0	158
IPI00211096	Tax_Id=10116 Gene_Symbol=Hsd11b1 Isoform 11-HSD1A of Corticosteroid 11-beta-dehydrogenase isozyme 1	156	170	K.QSgNGSIAIISSMAGK.M	0.004000000001000.0	158
IPI00211593	Tax_Id=10116 Gene_Symbol=Sod2 Superoxide dismutase [Mn], mitochondrial precursor	54	75	K.HHATYVNNLgNVTEEKYHEALAK.G	0.0000000004000000000000.0	63
IPI00211616	Tax_Id=10116 Gene_Symbol=Slc3a2 4F2 cell-surface antigen heavy chain	247	262	K.LANASLYLAEWQgNITK.N	0.0000000000004000.0	259
IPI00211616	Tax_Id=10116 Gene_Symbol=Slc3a2 4F2 cell-surface antigen heavy chain	247	262	K.LAgNASLYLAEWQgNITK.N	0.0040000000004000.0	249259
IPI00211616	Tax_Id=10116 Gene_Symbol=Slc3a2 4F2 cell-surface antigen heavy chain	247	268	K.LANASLYLAEWQgNITKgNFSEDR.L	0.0000000000004000400000.0	259263
IPI00211616	Tax_Id=10116 Gene_Symbol=Slc3a2 4F2 cell-surface antigen heavy chain	247	268	K.LAgNASLYLAEWQgNITKgNFSEDR.L	0.0040000000004000400000.0	249259263
IPI00211616	Tax_Id=10116 Gene_Symbol=Slc3a2 4F2 cell-surface antigen heavy chain	316	323	K.YLgNATGSR.W	0.00400000.0	318
IPI00211648	Tax_Id=10116 Gene_Symbol=Slc3a1 Neutral and basic amino acid transport protein rBAT	321	339	K.DLRNEIQVgNTSQIPDTVTR.Y	0.0000000040000000000.0	329
IPI00211648	Tax_Id=10116 Gene_Symbol=Slc3a1 Neutral and basic amino acid transport protein rBAT	324	339	R.NEIQVgNTSQIPDTVTR.Y	0.0000040000000000.0	329
IPI00211648	Tax_Id=10116 Gene_Symbol=Slc3a1 Neutral and basic amino acid transport protein rBAT	324	339	R.NEIQVgNTSQIPDTVTR.Y	0.4000040000000000.0	329
IPI00211648	Tax_Id=10116 Gene_Symbol=Slc3a1 Neutral and basic amino acid transport protein rBAT	504	539	K.SPMQWDNSSNAGFTEAgNHTWLPTNSDYHTVNVDVQK.T	0.000000000000000040000000000000000000.0	520
IPI00211648	Tax_Id=10116 Gene_Symbol=Slc3a1 Neutral and basic amino acid transport protein rBAT	504	539	K.SPMQWDNSSNAGFTEAgNHTWLPTNSDYHTVNVDVQK.T	0.000000000000000040000004000000000000.0	520
IPI00211648	Tax_Id=10116 Gene_Symbol=Slc3a1 Neutral and basic amino acid transport protein rBAT	504	539	K.SPMQWDNSSNAGFTEAgNHTWLPTNSDYHTVNVDVQK.T	0.000000000400000040000000000000000000.0	520
IPI00211648	Tax_Id=10116 Gene_Symbol=Slc3a1 Neutral and basic amino acid transport protein rBAT	504	539	K.SPMQWDgNSSNAGFTEAgNHTWLPTNSDYHTVNVDVQK.T	0.000000400400000040000004000000000000.0	510520
IPI00211812	Tax_Id=10116 Gene_Symbol=Copb1 Coatomer subunit beta	899	928	R.SIFGEDALAgNVSIEKPVHQGPDAAVTGHIR.I	0.000000000400000000000000000000.0	908
IPI00211989	Tax_Id=10116 Gene_Symbol=Khk Isoform C of Ketohexokinase	79	108	R.RGVDVSQVAWQSQGDTPCSCCIVNNSgNGSR.T	0.000000000000000000000000004000.0	105
IPI00211989	Tax_Id=10116 Gene_Symbol=Khk Isoform C of Ketohexokinase	79	108	R.RGVDVSQVAWQSQGDTPCSCCIVgNNSNGSR.T	0.000000000000000000000004000000.0	102
IPI00211989	Tax_Id=10116 Gene_Symbol=Khk Isoform C of Ketohexokinase	80	108	R.GVDVSQVAWQSQGDTPCSCCIVNNSgNGSR.T	0.00000000000000000000000004000.0	105
IPI00211989	Tax_Id=10116 Gene_Symbol=Khk Isoform C of Ketohexokinase	80	108	R.GVDVSQVAWQSQGDTPCSCCIVgNNSgNGSR.T	0.00000000000000000000004004000.0	102105
IPI00212014	Tax_Id=10116 Gene_Symbol=Vcp Transitional endoplasmic reticulum ATPase	390	424	K.LADDVDLEQVAgNETHGHVGADLAALCSEAALQAIR.K	0.00000000000400000000000000000000000.0	401
IPI00212307	Tax_Id=10116 Gene_Symbol=Nrp1 Neuropilin-1 precursor	517	527	K.IAYSNgNGSDWK.M	0.00000400000.0	522
IPI00212516	Tax_Id=10116 Gene_Symbol=Tmed4_predicted transmembrane emp24 protein transport domain containing 4	100	120	R.FTFTSHTPGDHQICLHSgNSTR.M	0.000000000000000004000.0	117
IPI00212546	Tax_Id=10116 Gene_Symbol=Emb Embigin precursor	105	120	K.KDDALLETTDGFgNTTK.M	0.0000000000004000.0	117
IPI00212546	Tax_Id=10116 Gene_Symbol=Emb Embigin precursor	106	120	K.DDALLETTDGFgNTTK.M	0.000000000004000.0	117
IPI00212666	Tax_Id=10116 Gene_Symbol=Mug1 Isoform 1 of Murinoglobulin-1 precursor	1002	1012	K.YLgNETQQLTEK.I	0.00400000000.0	1004
IPI00212666	Tax_Id=10116 Gene_Symbol=Mug1 Isoform 1 of Murinoglobulin-1 precursor	1137	1160	K.ALGCLEASWETIEQGRgNGSFVYTK.T	0.000000000000000040000000.0	1153
IPI00212666	Tax_Id=10116 Gene_Symbol=Mug1 Isoform 1 of Murinoglobulin-1 precursor	386	404	K.AQEAGYTgNATTTDQHGLAK.F	0.0000000400000000000.0	393
IPI00212666	Tax_Id=10116 Gene_Symbol=Mug1 Isoform 1 of Murinoglobulin-1 precursor	877	909	K.SLGNVgNFSVSVEAQQSPELCGSQVATVPETGRK.D	0.000004000000000000000000000000000.0	882
IPI00212708	Tax_Id=10116 Gene_Symbol=Fetub Fetub protein	146	162	R.RVLYLPAYgNCTLRPVSK.R	0.00000000400000000.0	154
IPI00212708	Tax_Id=10116 Gene_Symbol=Fetub Fetub protein	147	162	R.VLYLPAYgNCTLRPVSK.R	0.0000000400000000.0	154
IPI00212725	Tax_Id=10116 Gene_Symbol=Cd164 Endolyn precursor	88	101	K.TYCSSELVSgNCTQK.T	0.00000000040000.0	97
IPI00212730	Tax_Id=10116 Gene_Symbol=Lamp2 Lysosome-associated membrane glycoprotein 2 precursor	101	120	K.EASQYFINgNITLSYNTgNDTK.T	0.00000000400000004000.0	109117
IPI00212730	Tax_Id=10116 Gene_Symbol=Lamp2 Lysosome-associated membrane glycoprotein 2 precursor	249	274	K.VPFIFNINPATTgNFTGSCQPQTAQLR.L	0.00000000000040000000000000.0	261
IPI00212731	Tax_Id=10116 Gene_Symbol=Ctsd Cathepsin D precursor	249	261	R.YYHGELSYLgNVTR.K	0.0000000004000.0	258
IPI00212809	Tax_Id=10116 Gene_Symbol=Ctsh Cathepsin H precursor	92	104	K.YLWSEPQgNCSATK.S	0.0000000400000.0	99
IPI00212933	Tax_Id=10116 Gene_Symbol=Slc5a1 Sodium/glucose cotransporter 1	239	252	K.AIPTLVSDGgNITVK.E	0.00000000040000.0	248
IPI00213036	Tax_Id=10116 Gene_Symbol=C4a Complement C4 precursor	1321	1331	K.ALgNVTLSSMGR.N	0.00400000000.0	1323
IPI00213463	Tax_Id=10116 Gene_Symbol=Actn4 Alpha-actinin-4	675	691	R.ISIEMgNGTLEDQLSHLK.Q	0.00000400000000000.0	680
IPI00213569	Tax_Id=10116 Gene_Symbol=Ugt1a1 UDP-glucuronosyltransferase 1-1 precursor	80	99	R.KYPVPFQNEgNVTAAFVELGR.S	0.00000000040000000000.0	89
IPI00213584	Tax_Id=10116 Gene_Symbol=Agxt2 Alanine--glyoxylate aminotransferase 2, mitochondrial precursor	183	194	R.AYSgNHTDIISFR.G	0.000400000000.0	186
IPI00213584	Tax_Id=10116 Gene_Symbol=Agxt2 Alanine--glyoxylate aminotransferase 2, mitochondrial precursor	265	300	R.YIEQFKDTLgNTSVATSIAGFFAEPIQGVNGVVQYPK.E	0.000000000400000000000000000000000000.0	274
IPI00213584	Tax_Id=10116 Gene_Symbol=Agxt2 Alanine--glyoxylate aminotransferase 2, mitochondrial precursor	265	300	R.YIEQFKDTLgNTSVATSIAGFFAEPIQGVNGVVQYPK.E	0.000000000400000000000000000040000000.0	274
IPI00213584	Tax_Id=10116 Gene_Symbol=Agxt2 Alanine--glyoxylate aminotransferase 2, mitochondrial precursor	271	300	K.DTLgNTSVATSIAGFFAEPIQGVNGVVQYPK.E	0.000400000000000000000040000000.0	274
IPI00214158	Tax_Id=10116 Gene_Symbol=Slc22a6 Renal organic anion transporter 1	101	131	R.VTEPCIDGWVYDgNSTFPSTIVTEWNLVCSHR.A	0.0000000000004000000000000000000.0	113
IPI00214158	Tax_Id=10116 Gene_Symbol=Slc22a6 Renal organic anion transporter 1	81	100	R.FTSPQWGPPFYgNGTEAgNGTR.V	0.00000000000400004000.0	92,97
IPI00214328	Tax_Id=10116 Gene_Symbol=Naglt1 Sodium-dependent glucose transporter 1	186	204	K.LAWGTTASAQgNHTEPQLDR.S	0.0000000000400000000.0	196
IPI00214328	Tax_Id=10116 Gene_Symbol=Naglt1 Sodium-dependent glucose transporter 1	70	85	R.NVNRgNISSLSEIFVGR.A	0.0000400000000000.0	74
IPI00214373	Tax_Id=10116 Gene_Symbol=Aadat Kynurenine/alpha-aminoadipate aminotransferase mitochondrial precursor	50	62	K.SAVFTVEgNGSTIR.F	0.0000000400000.0	57
IPI00214373	Tax_Id=10116 Gene_Symbol=Aadat Kynurenine/alpha-aminoadipate aminotransferase mitochondrial precursor	94	123	K.LHNPPTVgNYSPNEGQMDLCITSGCQDGLCK.V	0.000000040000000000000000000000.0	101
IPI00214499	Tax_Id=10116 Gene_Symbol=P2rx7 P2X purinoceptor 7	67	82	K.GVAEVTEgNVTEGGVTK.L	0.0000000400000000.0	74
IPI00214787	Tax_Id=10116 Gene_Symbol=Slc16a1 Monocarboxylate transporter 1	473	494	K.ETQSPAPLQgNSSGDPAEEESPV.-	0.0000000004000000000000.0	482
IPI00214859	Tax_Id=10116 Gene_Symbol=Col18a1 similar to Collagen alpha-1(XVIII) chain precursor	587	611	R.DGQQgNISLLYTEPGASQTQTGASFR.L	0.0000400000000000000000000.0	591
IPI00214915	Tax_Id=10116 Gene_Symbol=Tm6p1 Transmembrane protein 150 precursor	31	55	R.HVCPVENWSYgNDSCSPDPAEQGGPK.T	0.0000000000400000000000000.0	41
IPI00214987	Tax_Id=10116 Gene_Symbol=Fzd4 Frizzled-4 precursor	51	63	R.IAMCQNLGYgNVTK.M	0.0000000004000.0	60
IPI00215243	Tax_Id=10116 Gene_Symbol=Psma7 Isoform RC6-IL of Proteasome subunit alpha type-7	181	195	K.gNYTDDAIETDDLTIK.L	0.400000000000000.0	181
IPI00215357	Tax_Id=10116 Gene_Symbol=Cdh6 Cadherin-6 precursor	394	414	R.EDAQIgNTTIGSVAAQDPDAAR.N	0.000004000000000000000.0	399
IPI00230835	Tax_Id=10116 Gene_Symbol=Ywhag 14-3-3 protein gamma	29	42	K.gNVTELNEPLSNEER.N	0.40000000000000.0	29
IPI00230859	Tax_Id=10116 Gene_Symbol=Akr1a1 Alcohol dehydrogenase	43	68	R.HIDCASVYGgNETEIGEALKESVGAGK.A	0.00000000040000000000000000.0	52
IPI00230862	Tax_Id=10116 Gene_Symbol=Anpep Aminopeptidase N	111	125	R.FTCgNETTNVIIIHSK.K	0.000400000000000.0	114
IPI00230862	Tax_Id=10116 Gene_Symbol=Anpep Aminopeptidase N	231	252	K.ASFNITLIHPNgNLTALSNMLPK.D	0.0000000000040000000000.0	242
IPI00230862	Tax_Id=10116 Gene_Symbol=Anpep Aminopeptidase N	231	252	K.ASFNITLIHPNgNLTALSNMLPK.D	0.0000000000440000000000.0	242
IPI00230862	Tax_Id=10116 Gene_Symbol=Anpep Aminopeptidase N	231	252	K.ASFgNITLIHPNNLTALSNMLPK.D	0.0004000000400000000000.0	234
IPI00230862	Tax_Id=10116 Gene_Symbol=Anpep Aminopeptidase N	231	252	K.ASFgNITLIHPNgNLTALSNMLPK.D	0.0004000000040000000000.0	234242
IPI00230862	Tax_Id=10116 Gene_Symbol=Anpep Aminopeptidase N	231	252	K.ASFgNITLIHPNgNLTALSNMLPK.D	0.0004000000040000001000.0	234242
IPI00230862	Tax_Id=10116 Gene_Symbol=Anpep Aminopeptidase N	256	273	R.TLQEDPSWgNVTEFHPTPK.M	0.000000004000000000.0	264
IPI00230862	Tax_Id=10116 Gene_Symbol=Anpep Aminopeptidase N	769	792	R.DLVVGLYSQWMgNNSDNNPIHPNLR.S	0.000000000004000000000000.0	780
IPI00230907	Tax_Id=10116 Gene_Symbol=Mif Macrophage migration inhibitory factor	95	115	R.VYINYYDMNAANVGWgNGSTFA.-	0.000000000000000400000.0	110
IPI00230907	Tax_Id=10116 Gene_Symbol=Mif Macrophage migration inhibitory factor	95	115	R.VYINYYDMNAANVGWgNGSTFA.-	0.000000004000000400000.0	110
IPI00230907	Tax_Id=10116 Gene_Symbol=Mif Macrophage migration inhibitory factor	95	115	R.VYINYYDMNAANVGWgNGSTFA.-	0.000400000000000400000.0	110
IPI00230914	Tax_Id=10116 Gene_Symbol=Rpl5 60S ribosomal protein L5	229	241	K.NgNVTPDMMEEMYK.K	0.0400000000000.0	230
IPI00230914	Tax_Id=10116 Gene_Symbol=Rpl5 60S ribosomal protein L5	229	241	K.NgNVTPDMMEEMYK.K	0.0400000000100.0	230
IPI00230946	Tax_Id=10116 Gene_Symbol=Dpp7 Dipeptidyl-peptidase 2 precursor	318	355	R.ALAGLVYgNSSGMEPCFDIYQMYQSCADPTGCGTGSNAR.A	0.00000004000000000000000000000000000000.0	325
IPI00230946	Tax_Id=10116 Gene_Symbol=Dpp7 Dipeptidyl-peptidase 2 precursor	318	355	R.ALAGLVYgNSSGMEPCFDIYQMYQSCADPTGCGTGSNAR.A	0.00000004000000000000100000000000000000.0	325
IPI00230946	Tax_Id=10116 Gene_Symbol=Dpp7 Dipeptidyl-peptidase 2 precursor	318	355	R.ALAGLVYgNSSGMEPCFDIYQMYQSCADPTGCGTGSNAR.A	0.00000004000100000000000000000000000000.0	325
IPI00231028	Tax_Id=10116 Gene_Symbol=RGD1303003 ES1 protein homolog, mitochondrial precursor	140	149	K.gNLSTFAVDGK.D	0.4000000000.0	140
IPI00231139	Tax_Id=10116 Gene_Symbol=Tkt transketolase	376	384	K.gNSTFSELFK.K	0.400000000.0	376
IPI00231197	Tax_Id=10116 Gene_Symbol=Cd36 Platelet glycoprotein 4	317	332	K.VISNgNCTSYGVLDIGK.C	0.0000400000000000.0	321
IPI00231264	Tax_Id=10116 Gene_Symbol=Pon1 Serum paraoxonase/arylesterase 1	33	46	R.EVTPVDLPgNCTLVK.G	0.00000000400000.0	41
IPI00231359	Tax_Id=10116 Gene_Symbol=Acads Acetyl-Coenzyme A dehydrogenase, short chain	151	173	K.IGCFALSEPGgNGSDAGAASTTAR.E	0.00000000004000000000000.0	161
IPI00231359	Tax_Id=10116 Gene_Symbol=Acads Acetyl-Coenzyme A dehydrogenase, short chain	151	185	K.IGCFALSEPGNGSDAGAASTTAREEGDSWVLgNGTK.A	0.00000000000000000000000000000004000.0	182
IPI00231359	Tax_Id=10116 Gene_Symbol=Acads Acetyl-Coenzyme A dehydrogenase, short chain	151	185	K.IGCFALSEPGgNGSDAGAASTTAREEGDSWVLNGTK.A	0.00000000004000000000000000000000000.0	161
IPI00231451	Tax_Id=10116 Gene_Symbol=Atp1a3 Sodium/potassium-transporting ATPase subunit alpha-3	203	217	K.VDgNSSLTGESEPQTR.S	0.004000000000000.0	205
IPI00231451	Tax_Id=10116 Gene_Symbol=Atp1a3 Sodium/potassium-transporting ATPase subunit alpha-3	620	637	K.GVGIISEGgNETVEDIAAR.L	0.000000004000000000.0	628
IPI00231451	Tax_Id=10116 Gene_Symbol=Atp1a3 Sodium/potassium-transporting ATPase subunit alpha-3	698	716	R.QGAIVAVTGDGVgNDSPALK.K	0.0000000000004000000.0	710
IPI00231451	Tax_Id=10116 Gene_Symbol=Atp1a3 Sodium/potassium-transporting ATPase subunit alpha-3	698	717	R.QGAIVAVTGDGVgNDSPALKK.A	0.00000000000040000000.0	710
IPI00231478	Tax_Id=10116 Gene_Symbol=Scarb2 Lysosome membrane protein 2	116	134	K.AYIFERgNQSVGDPTVDLIR.T	0.0000004000000000000.0	122
IPI00231478	Tax_Id=10116 Gene_Symbol=Scarb2 Lysosome membrane protein 2	235	262	K.TSLDWWTTDTCNMIgNGTDGDSFHPLISK.D	0.0000000000000040000000000000.0	249
IPI00231478	Tax_Id=10116 Gene_Symbol=Scarb2 Lysosome membrane protein 2	98	115	K.ANVQFGEgNGTTISAVTNK.A	0.000000040000000000.0	105
IPI00231686	Tax_Id=10116 Gene_Symbol=Cd63 CD63 antigen	122	138	K.QMQNYLTDgNKTATILDK.L	0.00000000400000000.0	130
IPI00231686	Tax_Id=10116 Gene_Symbol=Cd63 CD63 antigen	145	156	K.CCGASgNYTDWER.I	0.000004000000.0	150
IPI00231686	Tax_Id=10116 Gene_Symbol=Cd63 CD63 antigen	163	182	K.DRVPDSCCIgNITVGCGNDFK.E	0.00000000040000000000.0	172
IPI00231742	Tax_Id=10116 Gene_Symbol=Cat Catalase	481	492	K.gNFTDVHPDYGAR.V	0.400000000000.0	481
IPI00231767	Tax_Id=10116 Gene_Symbol=Tpi1 Triosephosphate isomerase	195	206	K.CgNVSEGVAQCTR.I	0.040000000000.0	196
IPI00231789	Tax_Id=10116 Gene_Symbol=Mme Neprilysin	142	152	R.SCIgNESAIDSR.G	0.00040000000.0	145
IPI00231789	Tax_Id=10116 Gene_Symbol=Mme Neprilysin	199	223	K.VLINFFVGTDDKgNSTQHIIHFDQPR.L	0.0000000000004000000000000.0	211
IPI00231789	Tax_Id=10116 Gene_Symbol=Mme Neprilysin	276	293	K.VMELEKEIAgNATTKPEDR.N	0.000000000400000000.0	285
IPI00231789	Tax_Id=10116 Gene_Symbol=Mme Neprilysin	282	293	K.EIAgNATTKPEDR.N	0.000400000000.0	285
IPI00231988	Tax_Id=10116 Gene_Symbol=Ptprf Leukocyte common antigen-related phosphatase precursor	939	947	R.ITgNYTVVYR.D	0.004000000.0	941
IPI00324019	Tax_Id=10116 Gene_Symbol=Serpina1 Alpha-1-antiproteinase precursor	92	112	R.KQILEGLEFgNLTQIPEADIHK.A	0.000000000400000000000.0	101
IPI00324019	Tax_Id=10116 Gene_Symbol=Serpina1 Alpha-1-antiproteinase precursor	93	112	K.QILEGLEFgNLTQIPEADIHK.A	0.00000000400000000000.0	101
IPI00324302	Tax_Id=10116 Gene_Symbol=Acat1 Acetyl-CoA acetyltransferase, mitochondrial precursor	266	300	K.TVFQKENGTVTAAgNASTLNDGAAAVVLMTAEAAQR.L	0.00000000000004000000000000000000000.0	279
IPI00324302	Tax_Id=10116 Gene_Symbol=Acat1 Acetyl-CoA acetyltransferase, mitochondrial precursor	266	300	K.TVFQKEgNGTVTAANASTLNDGAAAVVLMTAEAAQR.L	0.00000040000000000000000000000000000.0	272
IPI00324302	Tax_Id=10116 Gene_Symbol=Acat1 Acetyl-CoA acetyltransferase, mitochondrial precursor	271	300	K.ENGTVTAAgNASTLNDGAAAVVLMTAEAAQR.L	0.000000004000000000000000000000.0	279
IPI00324302	Tax_Id=10116 Gene_Symbol=Acat1 Acetyl-CoA acetyltransferase, mitochondrial precursor	271	300	K.EgNGTVTAANASTLNDGAAAVVLMTAEAAQR.L	0.040000000000000000000000000000.0	272
IPI00324585	Tax_Id=10116 Gene_Symbol=Itga1 Integrin alpha-1 precursor	1112	1124	K.SEgNSSLTLSSSNR.K	0.0040000000000.0	1114
IPI00324585	Tax_Id=10116 Gene_Symbol=Itga1 Integrin alpha-1 precursor	206	226	K.QTQVGIVQYGEgNVTHEFNLNK.Y	0.000000000004000000000.0	217
IPI00324585	Tax_Id=10116 Gene_Symbol=Itga1 Integrin alpha-1 precursor	410	427	K.ANQMVIPHgNTTFQTEPAK.M	0.000000004000000000.0	418
IPI00324585	Tax_Id=10116 Gene_Symbol=Itga1 Integrin alpha-1 precursor	458	468	R.YgNHTGQVVIYK.M	0.04000000000.0	459
IPI00324585	Tax_Id=10116 Gene_Symbol=Itga1 Integrin alpha-1 precursor	525	534	K.VYVYAVgNQTR.F	0.0000004000.0	531
IPI00324585	Tax_Id=10116 Gene_Symbol=Itga1 Integrin alpha-1 precursor	774	805	R.VTLDFgNLTDPENGPVLDDALPNSVHEHIPFAK.D	0.00000400000000000000000000000000.0	779
IPI00324585	Tax_Id=10116 Gene_Symbol=Itga1 Integrin alpha-1 precursor	813	826	R.CISDLTLgNVSTTEK.S	0.00000004000000.0	820
IPI00324585	Tax_Id=10116 Gene_Symbol=Itga1 Integrin alpha-1 precursor	833	845	K.SQHDKFgNVSLTVK.N	0.0000004000000.0	839
IPI00324585	Tax_Id=10116 Gene_Symbol=Itga1 Integrin alpha-1 precursor	856	886	R.TVVQHSPNLIFSGIEEIQKDSCESNQgNITCR.V	0.0000000000000000000000000040000.0	882
IPI00324585	Tax_Id=10116 Gene_Symbol=Itga1 Integrin alpha-1 precursor	95	110	K.LDLPVgNTSIPgNVTEIK.E	0.0000040000400000.0	100105
IPI00324633	Tax_Id=10116 Gene_Symbol=Glud1 Glutamate dehydrogenase 1, mitochondrial precursor	192	200	K.gNYTDNELEK.I	0.400000000.0	192
IPI00324987	Tax_Id=10116 Gene_Symbol=P2rx4 P2X purinoceptor 4	181	190	K.AAEgNFTLLVK.N	0.0004000000.0	184
IPI00324987	Tax_Id=10116 Gene_Symbol=P2rx4 P2X purinoceptor 4	70	82	K.GVAVTgNTSQLGFR.I	0.0000040000000.0	75
IPI00325312	Tax_Id=10116 Gene_Symbol=Prom1 prominin 1 isoform 1	202	214	K.QIDYILGQYgNTTK.N	0.0000000004000.0	211
IPI00325312	Tax_Id=10116 Gene_Symbol=Prom1 prominin 1 isoform 1	259	269	K.DALQgNMSSSLK.S	0.00004000000.0	263
IPI00325312	Tax_Id=10116 Gene_Symbol=Prom1 prominin 1 isoform 1	273	286	R.DASTQLSTgNLTSVR.N	0.00000000400000.0	281
IPI00325847	Tax_Id=10116 Gene_Symbol=Cp GPI-anchored ceruloplasmin	129	144	K.ANEGAIYPDgNTTDFQR.A	0.0000000004000000.0	138
IPI00325860	Tax_Id=10116 Gene_Symbol=Podxl Podocalyxin precursor	423	452	R.LTEELQTVENGYHDgNPTLEVMETPSEMQEK.K	0.000000000000004000000000000000.0	437
IPI00326070	Tax_Id=10116 Gene_Symbol=Ctsl Cathepsin L1 precursor	213	233	K.YRAEYAVAgNDTGFVDIPQQEK.A	0.000000004000000000000.0	221
IPI00326070	Tax_Id=10116 Gene_Symbol=Ctsl Cathepsin L1 precursor	215	233	R.AEYAVAgNDTGFVDIPQQEK.A	0.0000004000000000000.0	221
IPI00326140	Tax_Id=10116 Gene_Symbol=Pzp Alpha-1-macroglobulin precursor	1446	1464	K.LTgNQTMGFSFAVEQDIPVK.N	0.0040000000000000000.0	1448
IPI00326140	Tax_Id=10116 Gene_Symbol=Pzp Alpha-1-macroglobulin precursor	375	391	K.GQPIPNKgNLTVQVNSVR.S	0.00000004000000000.0	382
IPI00326140	Tax_Id=10116 Gene_Symbol=Pzp Alpha-1-macroglobulin precursor	562	587	K.CFANTVgNLSFPSAQSLPASDTHLTVK.A	0.00000040000000000000000000.0	568
IPI00326140	Tax_Id=10116 Gene_Symbol=Pzp Alpha-1-macroglobulin precursor	562	587	K.CFANTVgNLSFPSAQSLPASDTHLTVK.A	0.00040040000000000000000000.0	568
IPI00326140	Tax_Id=10116 Gene_Symbol=Pzp Alpha-1-macroglobulin precursor	878	900	K.SLGEVgNFTATAEALQSPELCGNK.V	0.00000400000000000000000.0	883
IPI00326242	Tax_Id=10116 Gene_Symbol=Clcn5 Chloride channel protein 5	400	411	K.LCDYENHFgNTSK.G	0.000000004000.0	408
IPI00326242	Tax_Id=10116 Gene_Symbol=Clcn5 Chloride channel protein 5	400	411	K.LCDYENHFgNTSK.G	0.000004004000.0	408
IPI00326260	Tax_Id=10116 Gene_Symbol=Sdfr1 Isoform 2 of Neuroplastin precursor	274	287	K.ENGVFEEISgNSSGR.F	0.00000000040000.0	283
IPI00326305	Tax_Id=10116 Gene_Symbol=Atp1a1 Sodium/potassium-transporting ATPase subunit alpha-1 precursor	205	227	R.IISANGCKVDgNSSLTGESEPQTR.S	0.00000000004000000000000.0	215
IPI00326305	Tax_Id=10116 Gene_Symbol=Atp1a1 Sodium/potassium-transporting ATPase subunit alpha-1 precursor	205	227	R.IISANGCKVDgNSSLTGESEPQTR.S	0.00004000004000000000000.0	215
IPI00326305	Tax_Id=10116 Gene_Symbol=Atp1a1 Sodium/potassium-transporting ATPase subunit alpha-1 precursor	213	227	K.VDgNSSLTGESEPQTR.S	0.004000000000000.0	215
IPI00326305	Tax_Id=10116 Gene_Symbol=Atp1a1 Sodium/potassium-transporting ATPase subunit alpha-1 precursor	386	413	R.MTVAHMWFDNQIHEADTTEgNQSGVSFDK.T	0.0000000000000000000400000000.0	405
IPI00326305	Tax_Id=10116 Gene_Symbol=Atp1a1 Sodium/potassium-transporting ATPase subunit alpha-1 precursor	488	502	K.YQLSIHKNPgNASEPK.H	0.000000000400000.0	497
IPI00326305	Tax_Id=10116 Gene_Symbol=Atp1a1 Sodium/potassium-transporting ATPase subunit alpha-1 precursor	630	647	K.GVGIISEGgNETVEDIAAR.L	0.000000004000000000.0	638
IPI00326305	Tax_Id=10116 Gene_Symbol=Atp1a1 Sodium/potassium-transporting ATPase subunit alpha-1 precursor	708	726	R.QGAIVAVTGDGVgNDSPALK.K	0.0000000000004000000.0	720
IPI00326305	Tax_Id=10116 Gene_Symbol=Atp1a1 Sodium/potassium-transporting ATPase subunit alpha-1 precursor	708	727	R.QGAIVAVTGDGVgNDSPALKK.A	0.00000000000040000000.0	720
IPI00326462	Tax_Id=10116 Gene_Symbol=Enpp3 Ectonucleotide pyrophosphatase/phosphodiesterase family member 3	571	592	K.DSLgNCSCLALQTSGQEEQVNQR.L	0.0004000000000000000000.0	574
IPI00326462	Tax_Id=10116 Gene_Symbol=Enpp3 Ectonucleotide pyrophosphatase/phosphodiesterase family member 3	593	605	R.LgNLSGGEVSATEK.T	0.0400000000000.0	594
IPI00326462	Tax_Id=10116 Gene_Symbol=Enpp3 Ectonucleotide pyrophosphatase/phosphodiesterase family member 3	700	719	K.GNgNESQYDALITSNLVPMYK.E	0.00400000000000000000.0	702
IPI00326536	Tax_Id=10116 Gene_Symbol=Ptpns1 Ptpns1 protein	162	173	R.GSPGQTVgNFTCK.S	0.000000040000.0	169
IPI00326948	Tax_Id=10116 Gene_Symbol=Hsd17b4 Hsd17b4 protein	685	696	K.gNGSGEVYQGPAK.G	0.400000000000.0	685
IPI00326990	Tax_Id=10116 Gene_Symbol=Slc15a2 Oligopeptide transporter, kidney isoform	537	552	K.DLgNISLDTDAPLSVGK.D	0.0040000000000000.0	539
IPI00326990	Tax_Id=10116 Gene_Symbol=Slc15a2 Oligopeptide transporter, kidney isoform	537	560	K.DLgNISLDTDAPLSVGKDYGVSAYR.T	0.004000000000000000000000.0	539
IPI00327143	Tax_Id=10116 Gene_Symbol=Alpl Alkaline phosphatase, tissue-nonspecific isozyme precursor	137	152	R.TRCgNTTQGNEVTSILR.W	0.0004000000000000.0	140
IPI00327143	Tax_Id=10116 Gene_Symbol=Alpl Alkaline phosphatase, tissue-nonspecific isozyme precursor	139	152	R.CgNTTQGNEVTSILR.W	0.04000000000000.0	140
IPI00327143	Tax_Id=10116 Gene_Symbol=Alpl Alkaline phosphatase, tissue-nonspecific isozyme precursor	139	152	R.CgNTTQGNEVTSILR.W	0.04000040000000.0	140
IPI00327143	Tax_Id=10116 Gene_Symbol=Alpl Alkaline phosphatase, tissue-nonspecific isozyme precursor	230	241	K.gNRTDVEYELDEK.A	0.400000000000.0	230
IPI00327143	Tax_Id=10116 Gene_Symbol=Alpl Alkaline phosphatase, tissue-nonspecific isozyme precursor	423	450	K.VVDGEREgNVSMVDYAHNNYQAQSAVPLR.H	0.0000000400000000000000000000.0	430
IPI00327182	Tax_Id=10116 Gene_Symbol=Kng1 T-kininogen 1 precursor	196	207	K.IIYSIVQTgNCSK.E	0.000000004000.0	204
IPI00327182	Tax_Id=10116 Gene_Symbol=Kng1 T-kininogen 1 precursor	196	214	K.IIYSIVQTgNCSKEDFPSLR.E	0.0000000040000000000.0	204
IPI00327182	Tax_Id=10116 Gene_Symbol=Kng1 T-kininogen 1 precursor	80	113	K.EGgNCSVQSGLTWQDCDFKDAEEAATGECTTTLGK.K	0.0040000000000000000000000000000000.0	82
IPI00327182	Tax_Id=10116 Gene_Symbol=Kng1 T-kininogen 1 precursor	80	97	K.EGgNCSVQSGLTWQDCDFK.D	0.004000000000000000.0	82
IPI00327202	Tax_Id=10116 Gene_Symbol=Aqp1 Aquaporin-1	42	51	R.gNQTLVQDNVK.V	0.4000000000.0	42
IPI00327398	Tax_Id=10116 Gene_Symbol=Enpep Isoform 1 of Glutamyl aminopeptidase	233	243	K.ATYgNISLIHPK.E	0.00040000000.0	236
IPI00327398	Tax_Id=10116 Gene_Symbol=Enpep Isoform 1 of Glutamyl aminopeptidase	309	319	K.QTAEYAAgNITK.A	0.00000004000.0	316
IPI00327398	Tax_Id=10116 Gene_Symbol=Enpep Isoform 1 of Glutamyl aminopeptidase	577	590	K.WTENGNSgNITVYYR.S	0.00040004000000.0	584
IPI00327398	Tax_Id=10116 Gene_Symbol=Enpep Isoform 1 of Glutamyl aminopeptidase	594	609	R.EGITLNAgNLSGDGFLK.I	0.0000000400000000.0	601
IPI00327398	Tax_Id=10116 Gene_Symbol=Enpep Isoform 1 of Glutamyl aminopeptidase	620	646	R.VNYEAETWDWIAETLSSNHMgNFSSADR.S	0.000000000000000000004000000.0	640
IPI00327398	Tax_Id=10116 Gene_Symbol=Enpep Isoform 1 of Glutamyl aminopeptidase	746	764	K.MGAGEALGgNASQLFEAWLK.G	0.0000000040000000000.0	754
IPI00327398	Tax_Id=10116 Gene_Symbol=Enpep Isoform 1 of Glutamyl aminopeptidase	765	774	K.GgNESIPVNLR.L	0.0400000000.0	766
IPI00327398	Tax_Id=10116 Gene_Symbol=Enpep Isoform 1 of Glutamyl aminopeptidase	780	800	R.YGMQNSGNEAAWgNYTLEQYQK.T	0.000000000000400000000.0	792
IPI00327398	Tax_Id=10116 Gene_Symbol=Enpep Isoform 1 of Glutamyl aminopeptidase	780	800	R.YGMQNSGNEAAWgNYTLEQYQK.T	0.001000000000400000000.0	792
IPI00327469	Tax_Id=10116 Gene_Symbol=Ahsg Alpha-2-HS-glycoprotein precursor	155	165	R.FgNDTNVVHTVK.T	0.04000000000.0	156
IPI00327469	Tax_Id=10116 Gene_Symbol=Ahsg Alpha-2-HS-glycoprotein precursor	166	181	K.TALAAFNAQNgNGTYFK.L	0.0000000000400000.0	176
IPI00327469	Tax_Id=10116 Gene_Symbol=Ahsg Alpha-2-HS-glycoprotein precursor	72	103	R.RPFGEVYELEIDTLETTCHALDPTPLAgNCSVR.Q	0.00000000000000000000000000040000.0	99
IPI00327697	Tax_Id=10116 Gene_Symbol=Dpep1 Dipeptidase 1 precursor	108	130	R.MCQLYPETFECVTgNSSDILQAFR.R	0.00000000000004000000000.0	121
IPI00327697	Tax_Id=10116 Gene_Symbol=Dpep1 Dipeptidase 1 precursor	331	339	R.RgNWTETEVR.G	0.040000000.0	332
IPI00327697	Tax_Id=10116 Gene_Symbol=Dpep1 Dipeptidase 1 precursor	53	70	R.KSEAgNLSALAETHTNIPK.L	0.000040000000000000.0	57
IPI00331865	Tax_Id=10116 Gene_Symbol=Dbnl Isoform 2 of Drebrin-like protein	79	93	K.FVLIgNWTGEGVNDVR.K	0.000040000004000.0	83
IPI00332022	Tax_Id=10116 Gene_Symbol=Igf2r Mannose 6-phosphate/insulin-like growth factor II receptor	571	591	K.ITTgNITFVCKPGDLESAPVLR.A	0.000400000000000000000.0	574
IPI00339118	Tax_Id=10116 Gene_Symbol=Enpp1 Isoform 2 of Ectonucleotide pyrophosphatase/phosphodiesterase family member 1	321	331	K.VYgNGSVPFEER.I	0.00400000000.0	323
IPI00339124	Tax_Id=10116 Gene_Symbol=Atp1b1 Sodium/potassium-transporting ATPase subunit beta-1	151	170	R.FKLDWLGgNCSGLNDESYGYK.E	0.00000004000000000000.0	158
IPI00339124	Tax_Id=10116 Gene_Symbol=Atp1b1 Sodium/potassium-transporting ATPase subunit beta-1	151	170	R.FKLDWLGgNCSGLNDESYGYK.E	0.00000004000040000000.0	158
IPI00339124	Tax_Id=10116 Gene_Symbol=Atp1b1 Sodium/potassium-transporting ATPase subunit beta-1	153	170	K.LDWLGgNCSGLNDESYGYK.E	0.000004000000000000.0	158
IPI00339124	Tax_Id=10116 Gene_Symbol=Atp1b1 Sodium/potassium-transporting ATPase subunit beta-1	153	170	K.LDWLGgNCSGLNDESYGYK.E	0.000004000040000000.0	158
IPI00339124	Tax_Id=10116 Gene_Symbol=Atp1b1 Sodium/potassium-transporting ATPase subunit beta-1	257	276	K.YLQPLLAVQFTgNLTLDTEIR.I	0.00000000000400000000.0	268
IPI00357926	Tax_Id=10116 Gene_Symbol=Egfl5_predicted EGF-like-domain, multiple 5	257	272	R.GAVSILCgNSSGNCQCK.L	0.0000000400000000.0	264
IPI00358014	Tax_Id=10116 Gene_Symbol=Btd Biotinidase precursor	115	135	R.LVSWNPCLEPFRFgNDTEVLQR.L	0.000000000000040000000.0	128
IPI00358014	Tax_Id=10116 Gene_Symbol=Btd Biotinidase precursor	315	337	R.VATNPQGLVGTEgNTTSEMDPSHR.K	0.00000000000040000000000.0	327
IPI00358059	Tax_Id=10116 Gene_Symbol=Dnpep Aspartyl aminopeptidase	409	424	R.gNDSPCGTTIGPILASR.L	0.4000000000000000.0	409
IPI00359123	Tax_Id=10116 Gene_Symbol=RGD1310427_predicted hypothetical protein LOC362643	912	921	R.FINYgNQTVSR.M	0.0000400000.0	916
IPI00359847	Tax_Id=10116 Gene_Symbol=Galns N-acetylgalactosamine-6-sulfatase precursor	201	219	K.TGEAgNLTQLYLQEALDFIR.T	0.0000400000000000000.0	205
IPI00360541	Tax_Id=10116 Gene_Symbol=Itgb2 integrin beta 2	49	61	K.LgNFTGPGEPDSLR.C	0.0400000000000.0	50
IPI00360957	Tax_Id=10116 Gene_Symbol=Slc10a5 Sodium/bile acid cotransporter 5 precursor	63	76	K.LEDPTVLQVVgNVTK.T	0.00000000004000.0	73
IPI00361301	Tax_Id=10116 Gene_Symbol=Lama2_predicted similar to Laminin alpha-2 chain precursor	1058	1083	K.VCgNCSTVGSLSSQCNINTGQCSCHPK.F	0.00400000000000000000000000.0	1060
IPI00361557	Tax_Id=10116 Gene_Symbol=Cnnm2 94 kDa protein	105	117	R.VYGQNINgNETWSR.I	0.0000000400000.0	112
IPI00361798	Tax_Id=10116 Gene_Symbol=Igfbp7 Insulin-like growth factor binding protein 7	153	175	K.GTCEQGPSIVTPPKDIWgNITGAK.V	0.00000000000000000400000.0	170
IPI00362014	Tax_Id=10116 Gene_Symbol=Tln1 Tln1 protein	221	234	R.DDILgNGSHPVSFDK.A	0.00004000000000.0	225
IPI00362963	Tax_Id=10116 Gene_Symbol=RGD1310224 Similar to RIKEN cDNA 1810022C23	88	113	K.gNASTDNSVITVFTGVGDYYSSGNDLR.N	0.40000000000000000000000000.0	88
IPI00363265	Tax_Id=10116 Gene_Symbol=Hspa9a_predicted Stress-70 protein, mitochondrial precursor	188	202	K.NAVITVPAYFgNDSQR.Q	0.400000000040000.0	198
IPI00363534	Tax_Id=10116 Gene_Symbol=Lama1 laminin, alpha 1	1343	1352	R.IAgNISMEVGR.K	0.0040000000.0	1345
IPI00363534	Tax_Id=10116 Gene_Symbol=Lama1 laminin, alpha 1	1343	1352	R.IAgNISMEVGR.K	0.0040010000.0	1345
IPI00363534	Tax_Id=10116 Gene_Symbol=Lama1 laminin, alpha 1	1805	1816	K.LHVQEEQgNLTSK.L	0.000000040000.0	1812
IPI00363534	Tax_Id=10116 Gene_Symbol=Lama1 laminin, alpha 1	1997	2006	R.QAgNDSLTVLR.E	0.0040000000.0	1999
IPI00363534	Tax_Id=10116 Gene_Symbol=Lama1 laminin, alpha 1	2021	2032	K.ELAVAAgNETAAR.T	0.000000400000.0	2027
IPI00363534	Tax_Id=10116 Gene_Symbol=Lama1 laminin, alpha 1	2044	2053	R.VFgNTSEDLSR.V	0.0040000000.0	2046
IPI00363534	Tax_Id=10116 Gene_Symbol=Lama1 laminin, alpha 1	2044	2062	R.VFgNTSEDLSRVgNATVQETK.D	0.0040000000040000000.0	20462055
IPI00363534	Tax_Id=10116 Gene_Symbol=Lama1 laminin, alpha 1	2624	2639	R.TIgNISNLYIGGLPEGK.G	0.0040000000000000.0	2626
IPI00363534	Tax_Id=10116 Gene_Symbol=Lama1 laminin, alpha 1	661	680	R.EIDRDQLMTVLAgNVTHLLIR.A	0.00000000000040000000.0	673
IPI00363651	Tax_Id=10116 Gene_Symbol=Pxn 64 kDa protein	90	106	K.gNSSASNPQDSVGSLCSR.A	0.40000000000000000.0	90
IPI00363849	Tax_Id=10116 Gene_Symbol=Lamc1 similar to Laminin gamma-1 chain precursor	1201	1215	K.TAgNETSAEAYNLLLR.T	0.004000000000000.0	1203
IPI00363849	Tax_Id=10116 Gene_Symbol=Lamc1 similar to Laminin gamma-1 chain precursor	1216	1232	R.TLAGEgNQTALEIEELNR.K	0.00000400000000000.0	1221
IPI00363849	Tax_Id=10116 Gene_Symbol=Lamc1 similar to Laminin gamma-1 chain precursor	645	653	K.LLNgNLTSIK.I	0.000400000.0	648
IPI00364124	Tax_Id=10116 Gene_Symbol=Lrpap1 Alpha-2-macroglobulin receptor-associated protein precursor	260	275	R.VIDLWDLAQSAgNFTEK.E	0.0000000000040000.0	271
IPI00364124	Tax_Id=10116 Gene_Symbol=Lrpap1 Alpha-2-macroglobulin receptor-associated protein precursor	260	281	R.VIDLWDLAQSAgNFTEKELESFR.E	0.0000000000040000000000.0	271
IPI00364124	Tax_Id=10116 Gene_Symbol=Lrpap1 Alpha-2-macroglobulin receptor-associated protein precursor	260	285	R.VIDLWDLAQSAgNFTEKELESFREELK.H	0.00000000000400000000000000.0	271
IPI00364187	Tax_Id=10116 Gene_Symbol=RGD1309219 Putative uncharacterized protein RGD1309219	158	177	K.gNGTSGSDSPGQAVEAEEIVK.Q	0.40000000000000000000.0	158
IPI00364321	Tax_Id=10116 Gene_Symbol=Etfb Electron transfer flavoprotein subunit beta	125	161	K.QAIDDDCgNQTGQMTAGLLDWPQGTFASQVTLEGDKVK.V	0.0000000400000000000000000000000000000.0	132
IPI00364439	Tax_Id=10116 Gene_Symbol=RGD1559682_predicted similar to Peptidyl-prolyl cis-trans isomerase A	2	19	M.VNLTMFFgNITADGEPLGR.V	0.000010040000000000.0	9
IPI00364439	Tax_Id=10116 Gene_Symbol=RGD1559682_predicted similar to Peptidyl-prolyl cis-trans isomerase A	2	19	M.VgNLTMFFNITADGEPLGR.V	0.040010000000000000.0	3
IPI00364439	Tax_Id=10116 Gene_Symbol=RGD1559682_predicted similar to Peptidyl-prolyl cis-trans isomerase A	2	19	M.VgNLTMFFgNITADGEPLGR.V	0.040010040000000000.0	3,9
IPI00364439	Tax_Id=10116 Gene_Symbol=RGD1559682_predicted similar to Peptidyl-prolyl cis-trans isomerase A	92	118	K.HTGPGILSMANAGPNTgNGSQFFICTAK.T	0.000000000000000040000000000.0	108
IPI00364439	Tax_Id=10116 Gene_Symbol=RGD1559682_predicted similar to Peptidyl-prolyl cis-trans isomerase A	92	118	K.HTGPGILSMANAGPNTgNGSQFFICTAK.T	0.000000000000004040000000000.0	108
IPI00364439	Tax_Id=10116 Gene_Symbol=RGD1559682_predicted similar to Peptidyl-prolyl cis-trans isomerase A	92	118	K.HTGPGILSMANAGPNTgNGSQFFICTAK.T	0.000000000040000040000000000.0	108
IPI00364439	Tax_Id=10116 Gene_Symbol=RGD1559682_predicted similar to Peptidyl-prolyl cis-trans isomerase A	92	118	K.HTGPGILSMANAGPNTgNGSQFFICTAK.T	0.000000001000000040000000000.0	108
IPI00364764	Tax_Id=10116 Gene_Symbol=RGD1559717_predicted similar to R17.3	369	383	R.CSGDGLDSDGgNQTLR.W	0.000000000040000.0	379
IPI00364925	Tax_Id=10116 Gene_Symbol=Dhtkd1 Probable 2-oxoglutarate dehydrogenase E1 component DHKTD1, mitochondrial precursor	565	590	K.gNGTNLDWATAETLALGSLLAQGFNVR.L	0.40000000000000000000000000.0	565
IPI00365542	Tax_Id=10116 Gene_Symbol=Lamb1_predicted laminin, beta 1	1326	1345	R.SgNSTAGELDALQAEAGSLDK.T	0.04000000000000000000.0	1327
IPI00365542	Tax_Id=10116 Gene_Symbol=Lamb1_predicted laminin, beta 1	1383	1401	R.VNASTTDPgNSTVEQSALTR.D	0.0000000040000000000.0	1391
IPI00365542	Tax_Id=10116 Gene_Symbol=Lamb1_predicted laminin, beta 1	1383	1401	R.VgNASTTDPNSTVEQSALTR.D	0.0400000000000000000.0	1384
IPI00365542	Tax_Id=10116 Gene_Symbol=Lamb1_predicted laminin, beta 1	1383	1401	R.VgNASTTDPgNSTVEQSALTR.D	0.0400000040000000000.0	13841391
IPI00365542	Tax_Id=10116 Gene_Symbol=Lamb1_predicted laminin, beta 1	1579	1596	K.MEMPSTPQQLQgNLTEDIR.E	0.000000000004000000.0	1590
IPI00365545	Tax_Id=10116 Gene_Symbol=Dld Dihydrolipoyl dehydrogenase, mitochondrial precursor	73	89	K.gNETLGGTCLNVGCIPSK.A	0.40000000000000000.0	73
IPI00365784	Tax_Id=10116 Gene_Symbol=LOC306805 Similar to asporin	272	285	K.ITDIEgNGTFANIPR.V	0.00000400000000.0	277
IPI00365784	Tax_Id=10116 Gene_Symbol=LOC306805 Similar to asporin	272	285	K.ITDIEgNGTFANIPR.V	0.00000400004000.0	277
IPI00365922	Tax_Id=10116 Gene_Symbol=LOC362795 LOC362795 protein	307	324	R.VFTAQTQPHEEQLgNGTFR.V	0.000000000000040000.0	320
IPI00365935	Tax_Id=10116 Gene_Symbol=Ptges3_predicted Prostaglandin E synthase 3	49	65	K.HLNEIDLFHCIDPgNDSK.H	0.00000000000004000.0	62
IPI00365985	Tax_Id=10116 Gene_Symbol=Tra1_predicted 93 kDa protein	215	237	K.HNgNDTQHIWESDSNEFSVIADPR.G	0.00400000000000000000000.0	217
IPI00365985	Tax_Id=10116 Gene_Symbol=Tra1_predicted 93 kDa protein	44	67	R.TDDEVVQREEEAIQLDGLgNASQIR.E	0.000000000000000000400000.0	62
IPI00366011	Tax_Id=10116 Gene_Symbol=Sema4d_predicted similar to semaphorin 4D	377	389	R.AAgNYTSSLNLPDK.T	0.0040000000000.0	379
IPI00366038	Tax_Id=10116 Gene_Symbol=Atxn2l_predicted similar to ataxin 2-like	139	148	K.gNGTTYEGIFK.T	0.4000000000.0	139
IPI00366226	Tax_Id=10116 Gene_Symbol=Gns Glucosamine (N-acetyl)-6-sulfatase	173	183	K.YYgNYTLSINGK.A	0.00400000400.0	175
IPI00366226	Tax_Id=10116 Gene_Symbol=Gns Glucosamine (N-acetyl)-6-sulfatase	88	113	R.ASILTGKYPHNHHVVgNNTLEGgNCSSK.S	0.00000000000000040000040000.0	103109
IPI00366496	Tax_Id=10116 Gene_Symbol=Slc44a2_predicted similar to CTL2 gene	199	209	R.KgNVTDLVEGAK.K	0.04000000000.0	200
IPI00366496	Tax_Id=10116 Gene_Symbol=Slc44a2_predicted similar to CTL2 gene	407	419	K.TCNPETFPLgNESR.Q	0.0000000004000.0	416
IPI00366665	Tax_Id=10116 Gene_Symbol=Car12 Membrane-bound carbonic anhydrase 12	86	97	K.LLgNLTNDGHSVR.L	0.004000000000.0	88
IPI00366665	Tax_Id=10116 Gene_Symbol=Car12 Membrane-bound carbonic anhydrase 12	86	97	K.LLgNLTNDGHSVR.L	0.004004000000.0	88
IPI00367078	Tax_Id=10116 Gene_Symbol=Ddx18 DEAD (Asp-Glu-Ala-Asp) box polypeptide 18	254	265	R.gNGTGVLILSPTR.E	0.400000000000.0	254
IPI00368347	Tax_Id=10116 Gene_Symbol=Ube1x Ubiquitin-activating enzyme E1, Chr X	44	57	K.gNGSEADIDESLYSR.Q	0.40000000000000.0	44
IPI00368484	Tax_Id=10116 Gene_Symbol=- 46 kDa protein	16	27	R.SPCgNSSVLQDGR.R	0.000400000000.0	19
IPI00368692	Tax_Id=10116 Gene_Symbol=Srrm2_predicted similar to serine/arginine repetitive matrix 2	2327	2340	R.MAPALSGAgNLTSPR.V	0.00000000400000.0	2335
IPI00368704	Tax_Id=10116 Gene_Symbol=RGD1566313_predicted similar to Murinoglobulin 1 homolog	1000	1010	K.YLgNETQQLTEK.I	0.00400000000.0	1002
IPI00368704	Tax_Id=10116 Gene_Symbol=RGD1566313_predicted similar to Murinoglobulin 1 homolog	1135	1158	K.ALSCLESSWENIEQGGgNGSFVYTK.A	0.000000000000000040000000.0	1151
IPI00368704	Tax_Id=10116 Gene_Symbol=RGD1566313_predicted similar to Murinoglobulin 1 homolog	386	404	K.AQGAGFTgNATTTDQHGLAK.F	0.0000000400000000000.0	393
IPI00368780	Tax_Id=10116 Gene_Symbol=Tmem87a_predicted similar to CG17660-PA	128	137	K.VFQgNCSELYK.A	0.0004000000.0	131
IPI00369140	Tax_Id=10116 Gene_Symbol=RGD1309019_predicted 38 kDa protein	162	180	K.DAFTgNVSSPDAGATLPNDK.A	0.0000400000000000000.0	166
IPI00369539	Tax_Id=10116 Gene_Symbol=Mfap4 Microfibrillar-associated protein 4	133	146	R.VDLEDFEgNNTAYAK.Y	0.00000004000000.0	140
IPI00369551	Tax_Id=10116 Gene_Symbol=Slc5a10_predicted solute carrier family 5 (sodium/glucose cotransporter), member 10	236	246	R.TIPgNTTCHLPR.A	0.00040000000.0	239
IPI00369646	Tax_Id=10116 Gene_Symbol=Pfas_predicted phosphoribosylformylglycinamidine synthase	991	1007	R.VSVgNGTVVVEEPVGQLR.A	0.00040000000000000.0	994
IPI00369995	Tax_Id=10116 Gene_Symbol=Lrp1 similar to low density lipoprotein receptor-related protein 1	2905	2917	K.CgNASSQFLCSSGR.C	0.0400000000000.0	2906
IPI00369995	Tax_Id=10116 Gene_Symbol=Lrp1 similar to low density lipoprotein receptor-related protein 1	3330	3343	R.TCVSgNCTASQFVCK.N	0.00004000000000.0	3334
IPI00369995	Tax_Id=10116 Gene_Symbol=Lrp1 similar to low density lipoprotein receptor-related protein 1	3832	3843	R.FGTCSQLCgNNTK.G	0.000000004000.0	3840
IPI00370427	Tax_Id=10116 Gene_Symbol=Tinag Tubulointerstitial nephritis antigen	356	365	R.ISSgNETEIMR.E	0.0004000000.0	359
IPI00370427	Tax_Id=10116 Gene_Symbol=Tinag Tubulointerstitial nephritis antigen	356	365	R.ISSgNETEIMR.E	0.0004000010.0	359
IPI00370450	Tax_Id=10116 Gene_Symbol=Plxnb2 plexin B2	1087	1108	R.TEAGAFEYVADPTFEgNFTGGVK.K	0.0000000000000004000000.0	1102
IPI00370450	Tax_Id=10116 Gene_Symbol=Plxnb2 plexin B2	1087	1109	R.TEAGAFEYVADPTFEgNFTGGVKK.Q	0.00000000000000040000000.0	1102
IPI00370450	Tax_Id=10116 Gene_Symbol=Plxnb2 plexin B2	519	533	K.SCVTITDAFPQgNMSR.R	0.000000000004000.0	530
IPI00370752	Tax_Id=10116 Gene_Symbol=Nit2 Nitrilase family, member 2	169	193	R.GCQLLVYPGAFgNMTTGPAHWELLQR.A	0.0000000000040000000000000.0	180
IPI00370827	Tax_Id=10116 Gene_Symbol=Mcoln1_predicted mucolipin 1	152	168	R.GGGGPWAgNGSALALCQR.Y	0.00000004000000000.0	159
IPI00370827	Tax_Id=10116 Gene_Symbol=Mcoln1_predicted mucolipin 1	173	187	R.GHVDPAgNDTFDIDPR.V	0.000000400000000.0	179
IPI00370977	Tax_Id=10116 Gene_Symbol=LOC689765 similar to beta 3-glycosyltransferase-like	147	157	R.QAAgNLTQDLPR.V	0.00040000000.0	150
IPI00371761	Tax_Id=10116 Gene_Symbol=Enpp4_predicted ectonucleotide pyrophosphatase/phosphodiesterase 4	363	371	K.IgNVTEVYNK.L	0.040000000.0	364
IPI00371853	Tax_Id=10116 Gene_Symbol=Col6a1_predicted similar to Collagen alpha-1(VI) chain precursor	788	811	K.ENYAELLDDGFLKgNITAQICIDKK.C	0.000000000000040000000000.0	801
IPI00372372	Tax_Id=10116 Gene_Symbol=Serpinc1 Serine (Or cysteine) peptidase inhibitor, clade C (Antithrombin), member 1	125	133	K.LGACgNNTLK.Q	0.000040000.0	129
IPI00372372	Tax_Id=10116 Gene_Symbol=Serpinc1 Serine (Or cysteine) peptidase inhibitor, clade C (Antithrombin), member 1	184	202	K.SLTFgNESYQDVSEIVYGAK.L	0.0000400000000000000.0	188
IPI00372372	Tax_Id=10116 Gene_Symbol=Serpinc1 Serine (Or cysteine) peptidase inhibitor, clade C (Antithrombin), member 1	217	230	R.VTINNWVAgNKTEGR.I	0.00000000400000.0	225
IPI00372400	Tax_Id=10116 Gene_Symbol=Dap3 Death associated protein 3	228	238	R.gNATDAVGVVLK.E	0.40000000000.0	228
IPI00372786	Tax_Id=10116 Gene_Symbol=Nid2 similar to nidogen 2 isoform 2	700	712	R.SFSLISGSIgNQTR.S	0.0000000004000.0	709
IPI00372786	Tax_Id=10116 Gene_Symbol=Nid2 similar to nidogen 2 isoform 2	716	723	R.IDQgNITYK.A	0.00040000.0	719
IPI00372804	Tax_Id=10116 Gene_Symbol=Sccpdh Probable saccharopine dehydrogenase	112	136	K.ACIEgNGTSCIDICGEPQFLELMHVK.Y	0.0000400000000000000000000.0	116
IPI00372804	Tax_Id=10116 Gene_Symbol=Sccpdh Probable saccharopine dehydrogenase	168	198	R.NQMgNGTLTAVESFLTINSGPEGLCIHDGTWK.S	0.0004000000000000000000000000000.0	171
IPI00372839	Tax_Id=10116 Gene_Symbol=Col6a2 similar to procollagen, type VI, alpha 2	139	154	R.GTFTDCALAgNMTQQIR.Q	0.0000000004000000.0	148
IPI00372839	Tax_Id=10116 Gene_Symbol=Col6a2 similar to procollagen, type VI, alpha 2	885	915	R.MALLQYGSQNQQQVAFPLTYgNVTTIHEALER.T	0.0000000000000000000040000000000.0	905
IPI00372952	Tax_Id=10116 Gene_Symbol=Icam2 Intercellular adhesion molecule 2	46	66	R.VgNCSTSCAAPEIGGLETPTNK.L	0.040000000000000000000.0	47
IPI00373052	Tax_Id=10116 Gene_Symbol=Hmgn1 High mobility group nucleosomal binding domain 1	62	94	K.QAEVADQQTTDLPAENGETEgNQSPASEEEKEAK.S	0.000000000000000000004000000000000.0	82
IPI00373052	Tax_Id=10116 Gene_Symbol=Hmgn1 High mobility group nucleosomal binding domain 1	62	94	K.QAEVADQQTTDLPAENGETEgNQSPASEEEKEAK.S	0.000000000000000400004000000000000.0	82
IPI00373144	Tax_Id=10116 Gene_Symbol=Snx5_predicted sorting nexin 5	389	402	R.NgNVSLLQSCIDLFK.N	0.04000000000000.0	390
IPI00373408	Tax_Id=10116 Gene_Symbol=Sort1 Sortilin precursor	154	165	K.DITNLIgNNTFIR.T	0.000000400000.0	160
IPI00373419	Tax_Id=10116 Gene_Symbol=Spnb2 Non-erythrocyte beta-spectrin	1953	1964	R.gNDSFTACIELGK.A	0.400000000000.0	1953
IPI00373579	Tax_Id=10116 Gene_Symbol=Vill_predicted similar to Villin-like protein	779	803	R.VDGETPSMNHTSSCSSSMIgNGSLPR.E	0.0000000000000000000400000.0	798
IPI00373752	Tax_Id=10116 Gene_Symbol=Flnb_predicted filamin, beta	2245	2265	K.gNGSCGVSYIAQEPGNYEVSIK.F	0.400000000000000000000.0	2245
IPI00382300	Tax_Id=10116 Gene_Symbol=Rab1 Ac2-048	193	209	K.gNATNVEQSFMTMAAEIK.K	0.40000000000000000.0	193
IPI00382320	Tax_Id=10116 Gene_Symbol=RGD1311563 93 kDa protein	611	629	R.TTLVDNNTWgNNSHIALVGK.A	0.0000000004000000000.0	620
IPI00382320	Tax_Id=10116 Gene_Symbol=RGD1311563 93 kDa protein	630	640	K.AMSSgNETAAYK.I	0.00004000000.0	634
IPI00388265	Tax_Id=10116 Gene_Symbol=Pgcp 48 kDa protein	318	344	R.LVLWTAEEQGGVGASQYYELHKAgNISK.Y	0.000000000000000000000004000.0	341
IPI00388265	Tax_Id=10116 Gene_Symbol=Pgcp 48 kDa protein	375	387	K.EVMSLLQPLgNITK.V	0.0000000004000.0	384
IPI00388265	Tax_Id=10116 Gene_Symbol=Pgcp 48 kDa protein	375	387	K.EVMSLLQPLgNITK.V	0.0010000004000.0	384
IPI00388323	Tax_Id=10116 Gene_Symbol=Hspg2 396 kDa protein	1864	1887	R.CSATGgNPTPTLEWIGGPSGQLPTK.A	0.000004000000000000000000.0	1869
IPI00388323	Tax_Id=10116 Gene_Symbol=Hspg2 396 kDa protein	3062	3083	R.SLTQGSMIVGNLAPVgNGTSQGK.F	0.0000000000000004000000.0	3077
IPI00388323	Tax_Id=10116 Gene_Symbol=Hspg2 396 kDa protein	3062	3083	R.SLTQGSMIVGNLAPVgNGTSQGK.F	0.0000001000000004000000.0	3077
IPI00388323	Tax_Id=10116 Gene_Symbol=Hspg2 396 kDa protein	65	71	R.ALVgNFTR.S	0.0004000.0	68
IPI00388355	Tax_Id=10116 Gene_Symbol=Manba Isoform 1 of Beta-mannosidase precursor	802	811	K.AgNITVSISQK.G	0.0400000000.0	803
IPI00388355	Tax_Id=10116 Gene_Symbol=Manba Isoform 1 of Beta-mannosidase precursor	98	118	K.LIFDGVDTVAEILFNgNVTIGK.T	0.000000000000000400000.0	113
IPI00388914	Tax_Id=10116 Gene_Symbol=Plxnb1_predicted plexin B1	1246	1259	K.YTADPgNITSVGPAK.S	0.00000400000000.0	1251
IPI00389129	Tax_Id=10116 Gene_Symbol=Ank3 Ankyrin G197	1484	1496	K.gNATTDALTSVLTK.I	0.4000000000000.0	1484
IPI00391338	Tax_Id=10116 Gene_Symbol=RGD1562791_predicted similar to ICOS ligand precursor	239	260	R.VAAgNFSTPVISTSGSSDPGQER.T	0.0004000000000000000000.0	242
IPI00391769	Tax_Id=10116 Gene_Symbol=Cacna2d1 Voltage-gated calcium channel alpha2/delta-1 subunit	977	989	K.SFSGLLDCGgNCSR.I	0.0000000004000.0	986
IPI00392474	Tax_Id=10116 Gene_Symbol=Slc39a8 Zinc transporter ZIP8	36	50	R.VFGAgNQSLSAAQLGR.L	0.000040000000000.0	40
IPI00392753	Tax_Id=10116 Gene_Symbol=LOC259246;LOC298116;LOC259245;LOC298109 Alpha2u globulin	49	58	R.EKIEEgNGSMR.V	0.0000040000.0	54
IPI00393036	Tax_Id=10116 Gene_Symbol=RGD1560364_predicted similar to vacuolar protein sorting 13C protein isoform 1A	2032	2042	K.gNGSQIDAVLDK.L	0.40000000000.0	2032
IPI00393333	Tax_Id=10116 Gene_Symbol=Atic Bifunctional purine biosynthesis protein PURH	359	379	K.gNGSYCVLQMDQSYKPDENEVR.T	0.400000000000000000000.0	359
IPI00393407	Tax_Id=10116 Gene_Symbol=Slco4c1 Kidney-specific organic anion transporter	544	553	K.AYYgNCSCIER.K	0.0004000000.0	547
IPI00393441	Tax_Id=10116 Gene_Symbol=RT1-CE2 MHC class I protein	275	294	K.EQgNYTCLVEHEGLPEPLSQR.W	0.00400000000000000000.0	277
IPI00395281	Tax_Id=10116 Gene_Symbol=Etfdh Electron transfer flavoprotein-ubiquinone oxidoreductase, mitochondrial precursor	548	558	R.gNLSIYDGPEQR.F	0.40000000000.0	548
IPI00395293	Tax_Id=10116 Gene_Symbol=Pde8a cAMP-specific cyclic nucleotide phosphodiesterase PDE8	319	345	R.VCgNGSNKVETTTECVQTDSQTDSQAGK.H	0.004000000000000000000000000.0	321
IPI00400573	Tax_Id=10116 Gene_Symbol=Tubb2c Tubulin beta-2C chain	337	350	K.gNSSYFVEWIPNNVK.T	0.40000000000000.0	337
IPI00400573	Tax_Id=10116 Gene_Symbol=Tubb2c Tubulin beta-2C chain	337	350	K.gNSSYFVEWIPNNVK.T	0.40000000000400.0	337
IPI00400573	Tax_Id=10116 Gene_Symbol=Tubb2c Tubulin beta-2C chain	337	350	K.gNSSYFVEWIPNNVK.T	0.40000000004000.0	337
IPI00400573	Tax_Id=10116 Gene_Symbol=Tubb2c Tubulin beta-2C chain	363	379	K.MSATFIGgNSTAIQELFK.R	0.00000004000000000.0	370
IPI00400579	Tax_Id=10116 Gene_Symbol=Gaa Lysosomal alpha-glucosidase precursor	138	154	R.LEgNLSSTESGYTATLTR.T	0.00400000000000000.0	140
IPI00400579	Tax_Id=10116 Gene_Symbol=Gaa Lysosomal alpha-glucosidase precursor	465	479	R.GVFITgNETGQPLIGK.V	0.000004000000000.0	470
IPI00400747	Tax_Id=10116 Gene_Symbol=Man2b1 Mannosidase 2, alpha B1	495	511	R.EIgNISICPASQTSEHFR.V	0.00400000000000000.0	497
IPI00400747	Tax_Id=10116 Gene_Symbol=Man2b1 Mannosidase 2, alpha B1	757	781	R.DDFRPTWTLgNQTEPVAGNYYPVNTR.I	0.0000000004000000000000000.0	766
IPI00417388	Tax_Id=10116 Gene_Symbol=Slc44a4 Choline transporter-like protein 4	401	421	K.VLVgNVSCDPMAPLgNSSCPELK.C	0.000400000000040000000.0	404414
IPI00421539	Tax_Id=10116 Gene_Symbol=Aco2 Aconitate hydratase, mitochondrial precursor	608	628	R.GHLDgNISNNLLIGAINIENGK.A	0.000040000000000000000.0	612
IPI00421601	Tax_Id=10116 Gene_Symbol=Asah1 N-acylsphingosine amidohydrolase 1	254	266	R.SVLEgNSTSYEEAK.N	0.0000400000000.0	258
IPI00421610	Tax_Id=10116 Gene_Symbol=Harpb64 Isoamyl acetate-hydrolyzing esterase 1 homolog	73	99	K.GAGLENPVAVTIFFGAgNDSTLKDENPK.Q	0.000000000000000040000000000.0	89
IPI00421625	Tax_Id=10116 Gene_Symbol=Mrlcb;RGD1565978_predicted Myosin regulatory light chain 2-B, smooth muscle isoform	94	104	K.LgNGTDPEDVIR.N	0.04000000000.0	95
IPI00421874	Tax_Id=10116 Gene_Symbol=Vdac1 Voltage-dependent anion-selective channel protein 1	237	256	K.VNgNSSLIGLGYTQTLKPGIK.L	0.00400000000000000000.0	239
IPI00421874	Tax_Id=10116 Gene_Symbol=Vdac1 Voltage-dependent anion-selective channel protein 1	33	61	K.TKSENGLEFTSSGSANTETTKVgNGSLETK.Y	0.00000000000000000000004000000.0	55
IPI00421874	Tax_Id=10116 Gene_Symbol=Vdac1 Voltage-dependent anion-selective channel protein 1	33	61	K.TKSENGLEFTSSGSANTETTKVgNGSLETK.Y	0.00000000000000040000004000000.0	55
IPI00421874	Tax_Id=10116 Gene_Symbol=Vdac1 Voltage-dependent anion-selective channel protein 1	33	61	K.TKSENGLEFTSSGSANTETTKVgNGSLETK.Y	0.00004000000000000000004000000.0	55
IPI00421874	Tax_Id=10116 Gene_Symbol=Vdac1 Voltage-dependent anion-selective channel protein 1	35	61	K.SENGLEFTSSGSANTETTKVgNGSLETK.Y	0.000000000000000000004000000.0	55
IPI00421874	Tax_Id=10116 Gene_Symbol=Vdac1 Voltage-dependent anion-selective channel protein 1	35	61	K.SENGLEFTSSGSANTETTKVgNGSLETK.Y	0.000000000000040000004000000.0	55
IPI00421874	Tax_Id=10116 Gene_Symbol=Vdac1 Voltage-dependent anion-selective channel protein 1	35	61	K.SENGLEFTSSGSANTETTKVgNGSLETK.Y	0.004000000000000000004000000.0	55
IPI00454558	Tax_Id=10116 Gene_Symbol=Enpp5 Ectonucleotide pyrophosphatase/phosphodiesterase family member 5 precursor	146	166	K.IHESYPTHYLPYgNESVSFEDR.V	0.000000000000400000000.0	158
IPI00464518	Tax_Id=10116 Gene_Symbol=Hexb Beta-hexosaminidase beta chain precursor	298	317	K.VGPVDPSLgNTTYVFFDTFFK.E	0.00000000400000000000.0	306
IPI00464518	Tax_Id=10116 Gene_Symbol=Hexb Beta-hexosaminidase beta chain precursor	47	77	R.LLYISPENFQIDNSPgNSTAGPSCSLLLEAFR.R	0.0000000000000004000000000000000.0	62
IPI00464518	Tax_Id=10116 Gene_Symbol=Hexb Beta-hexosaminidase beta chain precursor	47	78	R.LLYISPENFQIDNSPgNSTAGPSCSLLLEAFRR.Y	0.00000000000000040000000000000000.0	62
IPI00464765	Tax_Id=10116 Gene_Symbol=Igsf4a Immunoglobulin superfamily, member 4A	100	111	R.FQLLgNFSSSELK.V	0.000040000000.0	104
IPI00464765	Tax_Id=10116 Gene_Symbol=Igsf4a Immunoglobulin superfamily, member 4A	112	124	K.VSLTgNVSISDEGR.Y	0.0000400000000.0	116
IPI00464785	Tax_Id=10116 Gene_Symbol=Ppgb Protective protein for beta-galactosidase	136	153	K.MYVTgNDTEVAENNYQALK.D	0.000040000000000000.0	140
IPI00464785	Tax_Id=10116 Gene_Symbol=Ppgb Protective protein for beta-galactosidase	136	153	K.MYVTgNDTEVAENNYQALK.D	0.000040000000400000.0	140
IPI00464785	Tax_Id=10116 Gene_Symbol=Ppgb Protective protein for beta-galactosidase	136	153	K.MYVTgNDTEVAENNYQALK.D	0.000040000004000000.0	140
IPI00464785	Tax_Id=10116 Gene_Symbol=Ppgb Protective protein for beta-galactosidase	136	153	K.MYVTgNDTEVAENNYQALK.D	0.100040000000000000.0	140
IPI00464785	Tax_Id=10116 Gene_Symbol=Ppgb Protective protein for beta-galactosidase	136	153	K.MYVTgNDTEVAENNYQALK.D	0.100040000004000000.0	140
IPI00464785	Tax_Id=10116 Gene_Symbol=Ppgb Protective protein for beta-galactosidase	136	163	K.MYVTgNDTEVAENNYQALKDFYHLFPEYK.D	0.0000400000000000000000000000.0	140
IPI00464785	Tax_Id=10116 Gene_Symbol=Ppgb Protective protein for beta-galactosidase	322	342	R.LDPPCTgNTTAPSTYLNNPYVR.K	0.000000400000000000000.0	328
IPI00464785	Tax_Id=10116 Gene_Symbol=Ppgb Protective protein for beta-galactosidase	322	342	R.LDPPCTgNTTAPSTYLNNPYVR.K	0.000000400000000040000.0	328
IPI00464785	Tax_Id=10116 Gene_Symbol=Ppgb Protective protein for beta-galactosidase	322	342	R.LDPPCTgNTTAPSTYLNNPYVR.K	0.000000400000000400000.0	328
IPI00464886	Tax_Id=10116 Gene_Symbol=LOC652956 p55 protein	54	68	R.TgNGSVDLGEEEEAAR.G	0.040000000000000.0	55
IPI00470238	Tax_Id=10116 Gene_Symbol=Cd47 Isoform 2 of Leukocyte surface antigen CD47 precursor	27	42	K.SVEFTSCgNDTVVIPCK.V	0.0000000400000000.0	34
IPI00470238	Tax_Id=10116 Gene_Symbol=Cd47 Isoform 2 of Leukocyte surface antigen CD47 precursor	63	77	K.SYIFIYDGNKgNSTTR.E	0.000000000040000.0	73
IPI00470238	Tax_Id=10116 Gene_Symbol=Cd47 Isoform 2 of Leukocyte surface antigen CD47 precursor	94	119	K.GIASLTMDTHEAVVGgNYTCEVTELSR.E	0.00000000000000040000000000.0	109
IPI00470260	Tax_Id=10116 Gene_Symbol=Gm2a GM2 ganglioside activator protein	148	175	K.EGTYSLPSSgNFTVPDLELPSWLSTGNYR.I	0.0000000004000000000000000000.0	157
IPI00471607	Tax_Id=10116 Gene_Symbol=Picalm Clathrin-assembly lymphoid leukemia protein	480	509	K.LAPNKLVSDDLDSSLANLVGNLGIGgNGTTK.N	0.000000000000000000000000040000.0	505
IPI00471607	Tax_Id=10116 Gene_Symbol=Picalm Clathrin-assembly lymphoid leukemia protein	485	509	K.LVSDDLDSSLANLVGNLGIGgNGTTK.N	0.0000000000000000000040000.0	505
IPI00471666	Tax_Id=10116 Gene_Symbol=MGC94145 Uncharacterized protein C1orf179 homolog	183	204	K.GPNVPISTEVgNATQFLALVQEK.Y	0.0000000000400000000000.0	193
IPI00471666	Tax_Id=10116 Gene_Symbol=MGC94145 Uncharacterized protein C1orf179 homolog	208	240	K.ATISPGFTTLYVHQLPgNSTYTQAMVETMEELVR.A	0.000000000000000040000000000000000.0	224
IPI00471800	Tax_Id=10116 Gene_Symbol=Cdh16 Cadherin 16	516	529	R.LRKgNLSYEEAPDHK.V	0.00040000000000.0	519
IPI00471800	Tax_Id=10116 Gene_Symbol=Cdh16 Cadherin 16	600	613	R.FSLVgNDSEGWLCIK.E	0.00004000000000.0	604
IPI00475639	Tax_Id=10116 Gene_Symbol=LOC498736 Tubulin beta-2A chain	337	350	K.gNSSYFVEWIPNNVK.T	0.40000000000000.0	337
IPI00475639	Tax_Id=10116 Gene_Symbol=LOC498736 Tubulin beta-2A chain	337	350	K.gNSSYFVEWIPNNVK.T	0.40000000000400.0	337
IPI00475639	Tax_Id=10116 Gene_Symbol=LOC498736 Tubulin beta-2A chain	337	350	K.gNSSYFVEWIPNNVK.T	0.40000000004000.0	337
IPI00475639	Tax_Id=10116 Gene_Symbol=LOC498736 Tubulin beta-2A chain	363	379	K.MSATFIGgNSTAIQELFK.R	0.00000004000000000.0	370
IPI00475803	Tax_Id=10116 Gene_Symbol=Cyp2c23 56 kDa protein	189	205	R.FQYNgNKTFLNLMDLLNK.N	0.00004000000000000.0	193
IPI00476177	Tax_Id=10116 Gene_Symbol=Srprb 77 kDa protein	499	526	K.FDEFFSQGCAPGYKKgNSTLCDLCIGPAK.C	0.0000000000000004000000000000.0	514
IPI00476177	Tax_Id=10116 Gene_Symbol=Srprb 77 kDa protein	513	526	K.KgNSTLCDLCIGPAK.C	0.04000000000000.0	514
IPI00476177	Tax_Id=10116 Gene_Symbol=Srprb 77 kDa protein	514	526	K.gNSTLCDLCIGPAK.C	0.4000000000000.0	514
IPI00476540	Tax_Id=10116 Gene_Symbol=- 19 kDa protein	39	85	R.TEGAIDDSLIGGgNASAEGPEGEGTKSTVVTGVDIVMNHHLQETSFTK.E	0.00000000000040000000000000000000000040000000000.0	51
IPI00480673	Tax_Id=10116 Gene_Symbol=Rab1b;MGC105830 similar to Ras-related protein Rab-1B	154	170	K.gNATNVEQAFMTMAAEIK.K	0.40000000010000000.0	154
IPI00515854	Tax_Id=10116 Gene_Symbol=Entpd2 Ectonucleoside triphosphate diphosphohydrolase 2	127	138	R.LLgNLTSPEATAR.V	0.004000000000.0	129
IPI00551815	Tax_Id=10116 Gene_Symbol=Ybx1-ps3 Ybx1 protein	307	326	K.AADPPAEgNSSAPEAEQGGAE.-	0.00000004000000000000.0	314
IPI00554106	Tax_Id=10116 Gene_Symbol=Acaa1 Isoform 2 of 3-ketoacyl-CoA thiolase A, peroxisomal precursor	149	168	R.gNGSYDIGMACGVESMSLSNR.G	0.40000000000000000000.0	149
IPI00554106	Tax_Id=10116 Gene_Symbol=Acaa1 Isoform 2 of 3-ketoacyl-CoA thiolase A, peroxisomal precursor	276	299	K.DGGSTTAGgNSSQVSDGAAAVLLAR.R	0.000000004000000000000000.0	284
IPI00555252	Tax_Id=10116 Gene_Symbol=LOC682005;Gapdh;LOC685186 Glyceraldehyde-3-phosphate dehydrogenase	144	160	K.IVSgNASCTTNCLAPLAK.V	0.00040000000000000.0	147
IPI00555265	Tax_Id=10116 Gene_Symbol=Nnt Nicotinamide nucleotide transhydrogenase	380	394	R.MATQASTLYSNgNITK.L	0.000000000004000.0	391
IPI00557299	Tax_Id=10116 Gene_Symbol=LOC498940 Similar to Carboxylesterase 2	272	285	R.TVAgNLSGCEQVDSK.A	0.00040000000000.0	275
IPI00558132	Tax_Id=10116 Gene_Symbol=Neu1 44 kDa protein	340	350	R.WSFSgNGTSWQK.E	0.00004000000.0	344
IPI00558154	Tax_Id=10116 Gene_Symbol=LOC100125372 60 kDa protein	79	93	K.gNTTTYPPMCSQDAAK.G	0.400000000000000.0	79
IPI00558748	Tax_Id=10116 Gene_Symbol=LOC688457 similar to Major urinary protein precursor	49	58	R.EKIEEgNGSMR.V	0.0000040000.0	54
IPI00558912	Tax_Id=10116 Gene_Symbol=Myh11 similar to Myosin-11	595	620	K.NMDPLNDNVTSLLgNASSDKFVADLWK.D	0.00000000000004000000000000.0	608
IPI00559211	Tax_Id=10116 Gene_Symbol=- 11 kDa protein	27	36	R.EKIEEgNGSMR.V	0.0000040000.0	32
IPI00561341	Tax_Id=10116 Gene_Symbol=Olfml1 26 kDa protein	55	73	R.AYIQDFQEFSKgNLSTMLGR.C	0.0000000000040000000.0	66
IPI00564327	Tax_Id=10116 Gene_Symbol=Mug2 Murinoglobulin-2 precursor	1105	1128	K.ALGCLEASWETIEQGRgNGSFVYTK.A	0.000000000000000040000000.0	1121
IPI00564327	Tax_Id=10116 Gene_Symbol=Mug2 Murinoglobulin-2 precursor	285	303	K.LDNNGCSTQEVgNITEFQLK.E	0.0000000000040000000.0	296
IPI00564327	Tax_Id=10116 Gene_Symbol=Mug2 Murinoglobulin-2 precursor	285	303	K.LDNNGCSTQEVgNITEFQLK.E	0.0004000000040000000.0	296
IPI00564327	Tax_Id=10116 Gene_Symbol=Mug2 Murinoglobulin-2 precursor	381	399	K.AQEAGYTgNATTTDQHGLAK.F	0.0000000400000000000.0	388
IPI00564327	Tax_Id=10116 Gene_Symbol=Mug2 Murinoglobulin-2 precursor	970	982	K.YLgNETQQLTENIK.S	0.0040000000000.0	972
IPI00565128	Tax_Id=10116 Gene_Symbol=- 35 kDa protein	145	161	K.IVSgNASCTTNCLAPLAK.V	0.00040000000000000.0	148
IPI00565677	Tax_Id=10116 Gene_Symbol=Col6a3_predicted 289 kDa protein	369	393	K.NAgNPSELEQIVPSPAFILAAESLPK.I	0.0040000000000000000000000.0	371
IPI00567272	Tax_Id=10116 Gene_Symbol=- 37 kDa protein	158	174	K.IVSgNASCTTNCLAPLAK.V	0.00040000000000000.0	161
IPI00567379	Tax_Id=10116 Gene_Symbol=RGD1308874 Similar to RIKEN cDNA 2310001A20	156	169	R.VGPgNGTLFVVDAYK.G	0.00040000000000.0	159
IPI00568931	Tax_Id=10116 Gene_Symbol=- 36 kDa protein	143	159	K.IVSgNASCTTNCLAPLAK.V	0.00040000000000000.0	146
IPI00569815	Tax_Id=10116 Gene_Symbol=RGD1565238_predicted similar to glyceraldehyde-3-phosphate dehydrogenase	144	160	K.IVSgNASCTTNCLAPLAK.V	0.00040000000000000.0	147
IPI00763060	Tax_Id=10116 Gene_Symbol=LOC684327 similar to inter-alpha (globulin) inhibitor H5	655	671	K.TLFPNYFgNGSEIVIAGK.M	0.00000004000000000.0	662
IPI00763831	Tax_Id=10116 Gene_Symbol=LOC679565 similar to acyl-Coenzyme A binding domain containing 5	108	120	K.gNGSFQPTNEMMLR.F	0.4000000000000.0	108
IPI00763831	Tax_Id=10116 Gene_Symbol=LOC679565 similar to acyl-Coenzyme A binding domain containing 5	108	120	K.gNGSFQPTNEMMLR.F	0.4000000000100.0	108
IPI00764009	Tax_Id=10116 Gene_Symbol=LOC682869 similar to Golgi phosphoprotein 2 (Golgi membrane protein GP73) isoform 2	109	120	K.AVLVNgNITTGEK.L	0.000004000000.0	114
IPI00764984	Tax_Id=10116 Gene_Symbol=Itgav_predicted 106 kDa protein	16	31	K.AgNTTQPGIIEGGQVLK.C	0.0400000000000000.0	17
IPI00765277	Tax_Id=10116 Gene_Symbol=RGD1563548_predicted similar to endoplasmic oxidoreductase 1 beta	136	148	K.LGAIgNSTLSgNESK.E	0.0000400004000.0	140145
IPI00765293	Tax_Id=10116 Gene_Symbol=Aebp1_predicted AE binding protein 1	902	927	K.GVVTDEQGIPIAgNATISVSGINHGVK.T	0.00000000000040000000000000.0	914
IPI00765366	Tax_Id=10116 Gene_Symbol=Tubb4 tubulin, beta 4	337	350	K.gNSSYFVEWIPNNVK.T	0.40000000000000.0	337
IPI00765366	Tax_Id=10116 Gene_Symbol=Tubb4 tubulin, beta 4	337	350	K.gNSSYFVEWIPNNVK.T	0.40000000000400.0	337
IPI00765366	Tax_Id=10116 Gene_Symbol=Tubb4 tubulin, beta 4	337	350	K.gNSSYFVEWIPNNVK.T	0.40000000004000.0	337
IPI00765366	Tax_Id=10116 Gene_Symbol=Tubb4 tubulin, beta 4	363	379	K.MAATFIGgNSTAIQELFK.R	0.10000004000000000.0	370
IPI00765413	Tax_Id=10116 Gene_Symbol=- 58 kDa protein	151	172	R.VILILDPAISGgNETEPYPAFTR.G	0.0000000000040000000000.0	162
IPI00765413	Tax_Id=10116 Gene_Symbol=- 58 kDa protein	193	216	K.VWPDYPgNITVDPSLDWDSQVQQYR.A	0.000000400000000000000000.0	199
IPI00765413	Tax_Id=10116 Gene_Symbol=- 58 kDa protein	430	445	K.RQDPVSWgNETFEDISR.S	0.0000000400000000.0	437
IPI00765413	Tax_Id=10116 Gene_Symbol=- 58 kDa protein	90	108	R.YGYEgNDTEIANLYDEMVAK.R	0.0000400000000000000.0	94
IPI00765413	Tax_Id=10116 Gene_Symbol=- 58 kDa protein	90	108	R.YGYEgNDTEIANLYDEMVAK.R	0.0000400000000001000.0	94
IPI00767154	Tax_Id=10116 Gene_Symbol=Grhpr_predicted similar to glyoxylate reductase/hydroxypyruvate reductase	239	250	K.MKNTAVFIgNISR.G	0.000000004000.0	247
IPI00767419	Tax_Id=10116 Gene_Symbol=Siae_predicted sialic acid acetylesterase	421	437	R.AVAYGEKgNLTFQGPLPK.K	0.00000004000000000.0	428
IPI00768104	Tax_Id=10116 Gene_Symbol=Eea1_predicted early endosome antigen 1	59	82	K.HYQAVHDAGgNDSGHGGEASLALTR.D	0.000000000400000000000000.0	68
IPI00776882	Tax_Id=10116 Gene_Symbol=Calu calumenin isoform a	131	150	K.gNATYSYVLDDPDPDDGFNYK.Q	0.40000000000000000000.0	131
IPI00777229	Tax_Id=10116 Gene_Symbol=Dpp4 81 kDa protein	113	135	R.QLITEEKIPgNNTQWITWSQEGHK.L	0.00000000040000000000000.0	122
IPI00777229	Tax_Id=10116 Gene_Symbol=Dpp4 81 kDa protein	477	487	K.KLDFIVLgNETR.F	0.00000004000.0	484
IPI00777229	Tax_Id=10116 Gene_Symbol=Dpp4 81 kDa protein	478	487	K.LDFIVLgNETR.F	0.0000004000.0	484
IPI00778528	Tax_Id=10116 Gene_Symbol=Hspg2 284 kDa protein	1864	1887	R.CSATGgNPTPTLEWIGGPSGQLPTK.A	0.000004000000000000000000.0	1869
IPI00778528	Tax_Id=10116 Gene_Symbol=Hspg2 284 kDa protein	65	71	R.ALVgNFTR.S	0.0004000.0	68
IPI00779060	Tax_Id=10116 Gene_Symbol=Fbn1 115 kDa protein	331	348	K.AWGTPCELCPPVgNTSEYK.I	0.000000000000400000.0	343
IPI00785608	Tax_Id=10116 Gene_Symbol=Mup5 Alpha-2u globulin	49	58	R.EKIEEgNGSMR.V	0.0000040000.0	54
IPI00817070	Tax_Id=10116 Gene_Symbol=LOC685867;LOC684520 hypothetical protein LOC685867	95	110	R.VFDKEGgNGTVMGAEIR.H	0.0000004000000000.0	101
IPI00884593	Tax_Id=10116 Gene_Symbol=LOC259246;LOC298116;LOC259245 Rat alpha-2u-globulin	49	58	R.EKIEEgNGSMR.V	0.0000040000.0	54

## Sheet: SCX02
Glycoproteins identified in SCX02
IPI	description	pep_start	pep_end	glycoPep	mod	glycoSite
IPI00188541	Tax_Id=10116 Gene_Symbol=Itih4 inter-alpha-inhibitor H4 heavy chain	561	581	R.ISASGAELEALEAQVLgNLSLK.Y	0.000000000000000040000.0	577
IPI00188728	Tax_Id=10116 Gene_Symbol=Mfap3l Microfibrillar-associated protein 3-like precursor	102	114	K.WQMLDGGLLgNITK.V	0.0000000004000.0	111
IPI00188728	Tax_Id=10116 Gene_Symbol=Mfap3l Microfibrillar-associated protein 3-like precursor	60	79	K.EGNSALIgNCSAFGIPDLEYK.W	0.00000004000000000000.0	67
IPI00188881	Tax_Id=10116 Gene_Symbol=Slc22a2 Organic cation transporter OCT2	92	114	R.YEVDWgNQSTLDCVDPLSSLAADR.N	0.00000400000000000000000.0	97
IPI00188885	Tax_Id=10116 Gene_Symbol=Agrn Isoform 1 of Agrin precursor	811	830	K.AGFAQCICPTLTCPEAgNSTK.V	0.00000000000000004000.0	827
IPI00188924	Tax_Id=10116 Gene_Symbol=Uqcrc2 Cytochrome b-c1 complex subunit 2, mitochondrial precursor	359	374	K.AVAQGgNLSSADVQAAK.N	0.0000040000000000.0	364
IPI00188956	Tax_Id=10116 Gene_Symbol=Thy1 Thy-1 membrane glycoprotein precursor	88	107	K.VLTLAgNFTTKDEGDYMCELR.V	0.00000400000000000000.0	93
IPI00188956	Tax_Id=10116 Gene_Symbol=Thy1 Thy-1 membrane glycoprotein precursor	88	97	K.VLTLAgNFTTK.D	0.0000040000.0	93
IPI00189714	Tax_Id=10116 Gene_Symbol=Col12a1 similar to Collagen alpha-1(XII) chain precursor	1776	1790	R.NLQVYgNATSNSLTVK.W	0.000004000000000.0	1781
IPI00189714	Tax_Id=10116 Gene_Symbol=Col12a1 similar to Collagen alpha-1(XII) chain precursor	2540	2549	K.MLEAYgNLTEK.N	0.0000040000.0	2545
IPI00189714	Tax_Id=10116 Gene_Symbol=Col12a1 similar to Collagen alpha-1(XII) chain precursor	2693	2707	K.EAGgNITTDGYEILGK.L	0.000400000000000.0	2696
IPI00190577	Tax_Id=10116 Gene_Symbol=Lama5 similar to Laminin alpha-5 chain precursor	2198	2208	R.GIgNASSTAWAR.L	0.00400000000.0	2200
IPI00190577	Tax_Id=10116 Gene_Symbol=Lama5 similar to Laminin alpha-5 chain precursor	2212	2222	R.LgNASIADLQSK.L	0.04000000000.0	2213
IPI00190577	Tax_Id=10116 Gene_Symbol=Lama5 similar to Laminin alpha-5 chain precursor	2225	2253	R.SPLGPHgNQTAEQLQTLEQQSISLQQDTER.L	0.00000040000000000000000000000.0	2231
IPI00190577	Tax_Id=10116 Gene_Symbol=Lama5 similar to Laminin alpha-5 chain precursor	2295	2317	R.ALNELASQGFPGgNATTPSGEQLR.W	0.00000000000040000000000.0	2307
IPI00190577	Tax_Id=10116 Gene_Symbol=Lama5 similar to Laminin alpha-5 chain precursor	3201	3218	R.VFADGAPHYVAFYSgNVTR.V	0.000000000000004000.0	3215
IPI00190577	Tax_Id=10116 Gene_Symbol=Lama5 similar to Laminin alpha-5 chain precursor	3282	3312	R.VFDLHQNMGSVgNVSVGCTPAQLQTSGATAQK.V	0.0000000000040000000000000000000.0	3293
IPI00190577	Tax_Id=10116 Gene_Symbol=Lama5 similar to Laminin alpha-5 chain precursor	88	117	K.LVGGPVAGGDPgNQTIQGQYCDICIAANSNK.A	0.000000000004000000000000000000.0	99
IPI00190577	Tax_Id=10116 Gene_Symbol=Lama5 similar to Laminin alpha-5 chain precursor	924	933	R.LgNVTSPDLFR.L	0.0400000000.0	925
IPI00190606	Tax_Id=10116 Gene_Symbol=Myl1 Myosin light chain 1, skeletal muscle isoform	133	148	R.VFDKEGgNGTVMGAELR.H	0.0000004000000000.0	139
IPI00190846	Tax_Id=10116 Gene_Symbol=Casr Extracellular calcium-sensing receptor precursor	442	453	R.GLFTgNGSCADIK.K	0.000040000000.0	446
IPI00191090	Tax_Id=10116 Gene_Symbol=Bgn Biglycan precursor	268	281	R.MIEgNGSLSFLPTLR.E	0.00040000000000.0	271
IPI00191090	Tax_Id=10116 Gene_Symbol=Bgn Biglycan precursor	268	281	R.MIEgNGSLSFLPTLR.E	0.10040000000000.0	271
IPI00191090	Tax_Id=10116 Gene_Symbol=Bgn Biglycan precursor	302	315	K.LLQVVYLHSNgNITK.V	0.00000000004000.0	312
IPI00191103	Tax_Id=10116 Gene_Symbol=Ndufa2_predicted NADH dehydrogenase (ubiquinone) 1 alpha subcomplex, 2	74	87	K.gNVSLNNLSAAEVTK.A	0.40000000000000.0	74
IPI00191103	Tax_Id=10116 Gene_Symbol=Ndufa2_predicted NADH dehydrogenase (ubiquinone) 1 alpha subcomplex, 2	74	87	K.gNVSLNgNLSAAEVTK.A	0.40004400000000.0	74,79
IPI00191437	Tax_Id=10116 Gene_Symbol=- 64 kDa protein	134	152	R.YGYEgNDTEIANLYDEMVAK.Q	0.0000400000000000000.0	138
IPI00191437	Tax_Id=10116 Gene_Symbol=- 64 kDa protein	195	216	R.VILILDPAISGgNETEPYPAFTR.G	0.0000000000040000000000.0	206
IPI00191437	Tax_Id=10116 Gene_Symbol=- 64 kDa protein	237	260	K.VWPDYPgNITVDPSLDWDSQVQQYR.A	0.000000400000000000000000.0	243
IPI00191437	Tax_Id=10116 Gene_Symbol=- 64 kDa protein	271	278	R.gNSTALWWK.N	0.40000000.0	271
IPI00191593	Tax_Id=10116 Gene_Symbol=Trpv4 Transient receptor potential cation channel subfamily V member 4	207	219	R.gNDTIPVLLDIAER.T	0.4000000000000.0	207
IPI00191593	Tax_Id=10116 Gene_Symbol=Trpv4 Transient receptor potential cation channel subfamily V member 4	644	661	K.VCNEDQSgNCTVPSYPACR.D	0.000000040000000000.0	651
IPI00191681	Tax_Id=10116 Gene_Symbol=Itgb1 Integrin beta-1 precursor	203	220	K.LRNPCTSEQgNCTSPFSYK.N	0.000000000400000000.0	212
IPI00191681	Tax_Id=10116 Gene_Symbol=Itgb1 Integrin beta-1 precursor	205	220	R.NPCTSEQgNCTSPFSYK.N	0.0000000400000000.0	212
IPI00191681	Tax_Id=10116 Gene_Symbol=Itgb1 Integrin beta-1 precursor	34	63	K.SCGECIQAGPNCGWCTgNTTFLQEGMPTSAR.C	0.000000000000000040000000000000.0	50
IPI00191681	Tax_Id=10116 Gene_Symbol=Itgb1 Integrin beta-1 precursor	519	540	R.KEgNSSEICSNNGECVCGQCVCR.K	0.0040000000000000000000.0	521
IPI00191681	Tax_Id=10116 Gene_Symbol=Itgb1 Integrin beta-1 precursor	519	540	R.KEgNSSEICSNNGECVCGQCVCR.K	0.0040000000400000000000.0	521
IPI00191681	Tax_Id=10116 Gene_Symbol=Itgb1 Integrin beta-1 precursor	659	673	K.KDTCAQECSHFgNLTK.V	0.000000000004000.0	670
IPI00191707	Tax_Id=10116 Gene_Symbol=Pdha1 Pyruvate dehydrogenase E1 component subunit alpha, somatic form, mitochondrial precursor	89	119	R.GFCHLCDGQEACCVGLEAGIgNPTDHLITAYR.A	0.0000000000000000000040000000000.0	109
IPI00191711	Tax_Id=10116 Gene_Symbol=LOC259246;LOC298116;LOC259245 Major urinary protein precursor	49	58	R.EKIEEgNGSMR.V	0.0000040000.0	54
IPI00191738	Tax_Id=10116 Gene_Symbol=Gclm Glutamate--cysteine ligase regulatory subunit	95	107	K.LFIVGSgNSSSSTR.N	0.0000004000000.0	101
IPI00191789	Tax_Id=10116 Gene_Symbol=Hrg Histidine-rich glycoprotein	110	127	R.YSNESQDLSVNGYgNCTMR.S	0.000000000000040000.0	123
IPI00191789	Tax_Id=10116 Gene_Symbol=Hrg Histidine-rich glycoprotein	110	127	R.YSgNESQDLSVNGYgNCTMR.S	0.004000000040040000.0	112123
IPI00191929	Tax_Id=10116 Gene_Symbol=Tmem27 Collectrin precursor	65	80	R.EGTEISHVLLCgNVTQR.V	0.0000000000040000.0	76
IPI00192159	Tax_Id=10116 Gene_Symbol=Ube2d3 Ubiquitin-conjugating enzyme E2 D3	76	93	R.IYHPNINSgNGSICLDILR.S	0.000000004000000000.0	84
IPI00192279	Tax_Id=10116 Gene_Symbol=- 28 kDa protein	235	255	R.RSGPSDEGEEEMEDGTVTgNGS.-	0.000000000000000000400.0	253
IPI00192302	Tax_Id=10116 Gene_Symbol=Itih3 99 kDa protein	575	591	R.GDEKEgNITAEALELSLK.Y	0.00000400000000000.0	580
IPI00192458	Tax_Id=10116 Gene_Symbol=RGD1563860_predicted similar to ribosomal protein S6 kinase polypeptide 3	844	854	R.gNQSPVLEPVGR.S	0.40000000000.0	844
IPI00192495	Tax_Id=10116 Gene_Symbol=Ncstn Isoform 1 of Nicastrin precursor	500	519	K.LAGGTNFgNNSIQADPQTVTR.L	0.00000004000000000000.0	507
IPI00192495	Tax_Id=10116 Gene_Symbol=Ncstn Isoform 1 of Nicastrin precursor	543	576	R.SYLDDGPLQHYIAVSSPTgNTTYVVQYALAgNLTGK.V	0.0000000000000000004000000000040000.0	561572
IPI00192495	Tax_Id=10116 Gene_Symbol=Ncstn Isoform 1 of Nicastrin precursor	577	596	K.VTNLTQEQCQDPSKVPgNESK.D	0.00000000000000004000.0	593
IPI00192495	Tax_Id=10116 Gene_Symbol=Ncstn Isoform 1 of Nicastrin precursor	577	596	K.VTgNLTQEQCQDPSKVPNESK.D	0.00400000000000000000.0	579
IPI00192504	Tax_Id=10116 Gene_Symbol=Mrc2 Macrophage mannose receptor 2 precursor	490	504	R.WNDSPCgNQSLPSICK.K	0.000000400000000.0	496
IPI00192504	Tax_Id=10116 Gene_Symbol=Mrc2 Macrophage mannose receptor 2 precursor	63	75	R.VIPVCgNASLPAQR.W	0.0000040000000.0	68
IPI00192796	Tax_Id=10116 Gene_Symbol=RGD1564625_predicted similar to Transmembrane 9 superfamily protein member 3 precursor	302	312	R.IVDVgNLTSEGK.V	0.00004000000.0	306
IPI00193010	Tax_Id=10116 Gene_Symbol=Slc23a3_predicted solute carrier family 23 (nucleobase transporters), member 3	138	147	K.TPGgNASLSLR.L	0.0004000000.0	141
IPI00193397	Tax_Id=10116 Gene_Symbol=Slc34a1 Sodium-dependent phosphate transport protein 2A	284	303	K.SVITSIAVGDESLRgNHSLIR.I	0.00000000000000400000.0	298
IPI00193397	Tax_Id=10116 Gene_Symbol=Slc34a1 Sodium-dependent phosphate transport protein 2A	320	333	R.VEAIGSLAgNTTMEK.C	0.00000000400000.0	328
IPI00193397	Tax_Id=10116 Gene_Symbol=Slc34a1 Sodium-dependent phosphate transport protein 2A	320	333	R.VEAIGSLAgNTTMEK.C	0.00000000400100.0	328
IPI00193425	Tax_Id=10116 Gene_Symbol=Bsg Isoform 2 of Basigin precursor	143	160	K.TSDTGDQTISgNGTEANSK.Y	0.000000000040000000.0	153
IPI00193425	Tax_Id=10116 Gene_Symbol=Bsg Isoform 2 of Basigin precursor	143	160	K.TSDTGDQTISgNGTEANSK.Y	0.000000000040000400.0	153
IPI00193425	Tax_Id=10116 Gene_Symbol=Bsg Isoform 2 of Basigin precursor	37	54	K.TQLTCFLgNSSGIDIVGHR.W	0.000000040000000000.0	44
IPI00193485	Tax_Id=10116 Gene_Symbol=LOC361596 Isocitrate dehydrogenase [NADP], mitochondrial precursor	427	442	K.LNEHFLgNTTDFLDTIK.S	0.0000004000000000.0	433
IPI00193765	Tax_Id=10116 Gene_Symbol=Ctsc Dipeptidyl-peptidase 1 precursor	272	308	R.ILTgNNSQTPILSPQEVVSCSPYAQGCDGGFPYLIAGK.Y	0.0004000000000000000000000000000000000.0	275
IPI00193894	Tax_Id=10116 Gene_Symbol=Mgam_predicted 198 kDa protein	1290	1311	R.VILILDPAISGgNETEPYPAFTR.G	0.0000000000040000000000.0	1301
IPI00193894	Tax_Id=10116 Gene_Symbol=Mgam_predicted 198 kDa protein	1366	1373	R.gNSTALWWK.K	0.40000000.0	1366
IPI00193894	Tax_Id=10116 Gene_Symbol=Mgam_predicted 198 kDa protein	426	449	K.LVIILDPAISgNNSLSSNPYGPYDR.G	0.000000000040000000000000.0	436
IPI00193894	Tax_Id=10116 Gene_Symbol=Mgam_predicted 198 kDa protein	455	468	K.VWVgNSSDGNALIGK.V	0.00040000000000.0	458
IPI00193894	Tax_Id=10116 Gene_Symbol=Mgam_predicted 198 kDa protein	671	688	K.DQDPASFGEDSLLLgNSSR.H	0.000000000000004000.0	685
IPI00193894	Tax_Id=10116 Gene_Symbol=Mgam_predicted 198 kDa protein	942	959	R.IDCYPDEHGVSEAgNCTAR.G	0.000000000000040000.0	955
IPI00193983	Tax_Id=10116 Gene_Symbol=Cltc Clathrin heavy chain	1074	1094	R.KFDVgNTSAVQVLIEHIGNLDR.A	0.000040000000000000000.0	1078
IPI00194567	Tax_Id=10116 Gene_Symbol=Trim28 similar to Transcription intermediary factor 1-beta	410	429	K.IVAERPGTgNSTGPGPMAPPR.A	0.00000000400000000000.0	418
IPI00194958	Tax_Id=10116 Gene_Symbol=Picalm Isoform 2 of Phosphatidylinositol-binding clathrin assembly protein	447	474	K.STNVAVDSGGGLLKPTVASQgNQSLPVAK.L	0.0000000000000000000040000000.0	467
IPI00194958	Tax_Id=10116 Gene_Symbol=Picalm Isoform 2 of Phosphatidylinositol-binding clathrin assembly protein	480	504	K.LVSDDLDSSLANLVGNLGIGgNGTTK.N	0.0000000000000000000040000.0	500
IPI00195148	Tax_Id=10116 Gene_Symbol=Es2 Liver carboxylesterase 1 precursor	300	316	K.LDgNTSMSTVIDGVVLPK.T	0.00400000000000000.0	302
IPI00195148	Tax_Id=10116 Gene_Symbol=Es2 Liver carboxylesterase 1 precursor	369	387	K.RFSPNLgNISESVIPAIIEK.Y	0.0000004000000000000.0	375
IPI00195148	Tax_Id=10116 Gene_Symbol=Es2 Liver carboxylesterase 1 precursor	370	387	R.FSPNLgNISESVIPAIIEK.Y	0.000004000000000000.0	375
IPI00195160	Tax_Id=10116 Gene_Symbol=Psap Sulfated glycoprotein 1 precursor	213	226	R.TgNSSFVQGLVDHVK.E	0.04000000000000.0	214
IPI00195160	Tax_Id=10116 Gene_Symbol=Psap Sulfated glycoprotein 1 precursor	213	231	R.TgNSSFVQGLVDHVKEDCDR.L	0.0400000000000000000.0	214
IPI00195160	Tax_Id=10116 Gene_Symbol=Psap Sulfated glycoprotein 1 precursor	445	468	K.LVIYLEHNLEKgNSTKEEILAALEK.G	0.000000000004000000000000.0	456
IPI00195160	Tax_Id=10116 Gene_Symbol=Psap Sulfated glycoprotein 1 precursor	68	92	K.TVVTEAGNLLKDgNATEEEILHYLEK.T	0.0000000000004000000000000.0	80
IPI00195160	Tax_Id=10116 Gene_Symbol=Psap Sulfated glycoprotein 1 precursor	79	92	K.DgNATEEEILHYLEK.T	0.04000000000000.0	80
IPI00195173	Tax_Id=10116 Gene_Symbol=Cd59 CD59 glycoprotein precursor	25	55	R.CYNCLDPVSSCKTgNSTCSPNLDACLVAVSGK.Q	0.0000000000000400000000000000000.0	38
IPI00195173	Tax_Id=10116 Gene_Symbol=Cd59 CD59 glycoprotein precursor	37	55	K.TgNSTCSPNLDACLVAVSGK.Q	0.0400000000000000000.0	38
IPI00195241	Tax_Id=10116 Gene_Symbol=Apoh Beta-2-glycoprotein 1 precursor	110	125	K.TSVGgNSSFYQDTVVFK.C	0.0000400000000000.0	114
IPI00195241	Tax_Id=10116 Gene_Symbol=Apoh Beta-2-glycoprotein 1 precursor	203	213	K.TGgNWSALPSCK.A	0.00400000000.0	205
IPI00195241	Tax_Id=10116 Gene_Symbol=Apoh Beta-2-glycoprotein 1 precursor	49	75	R.YTTFEYPNTIGFACNPGYYLgNGTSSSK.C	0.000000000000000000004000000.0	69
IPI00195516	Tax_Id=10116 Gene_Symbol=Hpx Hemopexin precursor	180	192	R.SWPAVGgNCTAALR.W	0.0000004000000.0	186
IPI00195673	Tax_Id=10116 Gene_Symbol=Tubb6 Tubulin, beta 6	337	350	K.gNSSYFVEWIPNNVK.V	0.40000000000000.0	337
IPI00195673	Tax_Id=10116 Gene_Symbol=Tubb6 Tubulin, beta 6	337	350	K.gNSSYFVEWIPNNVK.V	0.40000000004000.0	337
IPI00195673	Tax_Id=10116 Gene_Symbol=Tubb6 Tubulin, beta 6	363	379	K.MASTFIGgNSTAIQELFK.R	0.00000004000000000.0	370
IPI00195875	Tax_Id=10116 Gene_Symbol=Pom210 Nuclear pore membrane glycoprotein 210 precursor	388	412	R.IEAVFPAEFFEVLSSSQgNGSYHHVR.A	0.0000000000000000040000000.0	405
IPI00195931	Tax_Id=10116 Gene_Symbol=Tspan8 D6.1A protein	116	126	R.ILgNETLYENAK.L	0.00400000000.0	118
IPI00196226	Tax_Id=10116 Gene_Symbol=RGD1303130 Uncharacterized protein C1orf85 homolog precursor	126	152	R.LLEFDSTgNVSEGTQPPGKPYPPYSLAK.F	0.000000040000000000000000000.0	133
IPI00196226	Tax_Id=10116 Gene_Symbol=RGD1303130 Uncharacterized protein C1orf85 homolog precursor	173	191	R.GHPVDDPTGAFAgNGSLTFK.V	0.0000000000004000000.0	185
IPI00196499	Tax_Id=10116 Gene_Symbol=Elmo2 similar to Engulfment and cell motility protein 2	72	84	K.gNGTILQLAISPSR.A	0.4000000000000.0	72
IPI00196620	Tax_Id=10116 Gene_Symbol=Cubn Cubilin precursor	2073	2090	R.FTSDTSVAGTGFgNASFHK.S	0.000000000000400000.0	2085
IPI00196620	Tax_Id=10116 Gene_Symbol=Cubn Cubilin precursor	2393	2405	K.DFVEIWEgNHTSGR.V	0.0000000400000.0	2400
IPI00196620	Tax_Id=10116 Gene_Symbol=Cubn Cubilin precursor	2410	2429	R.YCGgNSTPSSVDTSSNVASVK.F	0.00040000000000000000.0	2413
IPI00196620	Tax_Id=10116 Gene_Symbol=Cubn Cubilin precursor	2530	2537	R.VgNVTNEFK.S	0.04000000.0	2531
IPI00196620	Tax_Id=10116 Gene_Symbol=Cubn Cubilin precursor	3034	3049	R.AITCGGIYgNESSGILR.S	0.0000000040000000.0	3042
IPI00196620	Tax_Id=10116 Gene_Symbol=Cubn Cubilin precursor	3123	3133	K.STgNSSLTLLFK.T	0.00400000000.0	3125
IPI00196620	Tax_Id=10116 Gene_Symbol=Cubn Cubilin precursor	3398	3407	R.EYgNQTFGNLK.S	0.0040000000.0	3400
IPI00196620	Tax_Id=10116 Gene_Symbol=Cubn Cubilin precursor	777	788	R.KICGgNETLFPIR.S	0.000040000000.0	781
IPI00196620	Tax_Id=10116 Gene_Symbol=Cubn Cubilin precursor	778	788	K.ICGgNETLFPIR.S	0.00040000000.0	781
IPI00196620	Tax_Id=10116 Gene_Symbol=Cubn Cubilin precursor	955	966	R.GVgNCTWHVVVQR.G	0.004000000000.0	957
IPI00196656	Tax_Id=10116 Gene_Symbol=Srprb Ba1-667	484	511	K.FDEFFSQGCAPGYKKgNSTLCDLCIGPAK.C	0.0000000000000004000000000000.0	499
IPI00196656	Tax_Id=10116 Gene_Symbol=Srprb Ba1-667	498	511	K.KgNSTLCDLCIGPAK.C	0.04000000000000.0	499
IPI00196656	Tax_Id=10116 Gene_Symbol=Srprb Ba1-667	499	511	K.gNSTLCDLCIGPAK.C	0.4000000000000.0	499
IPI00196725	Tax_Id=10116 Gene_Symbol=Fthfd 10-formyltetrahydrofolate dehydrogenase	242	274	K.LTFFNSTLgNTSGLSTQGEALPIPGAHRPGVVTK.A	0.000000004000000000000000000000000.0	250
IPI00196922	Tax_Id=10116 Gene_Symbol=Slc9a3r2 25 kDa protein	130	163	R.VVPTEDHVEGPLPSPVTgNGTSLAQLNGGSVCSSR.S	0.0000000000000000040000000400000000.0	147
IPI00197684	Tax_Id=10116 Gene_Symbol=Xpnpep2 Membrane-bound aminopeptidase P	35	53	R.DCSTNPPRLPVTAVgNTTMR.L	0.0000000000000040000.0	49
IPI00197684	Tax_Id=10116 Gene_Symbol=Xpnpep2 Membrane-bound aminopeptidase P	35	53	R.DCSTNPPRLPVTAVgNTTMR.L	0.0000000000000040010.0	49
IPI00197684	Tax_Id=10116 Gene_Symbol=Xpnpep2 Membrane-bound aminopeptidase P	406	435	R.RNEgNFSSGPSFETISASGLNAALAHYSPTK.E	0.000400000000000000000000000000.0	409
IPI00197684	Tax_Id=10116 Gene_Symbol=Xpnpep2 Membrane-bound aminopeptidase P	407	435	R.NEgNFSSGPSFETISASGLNAALAHYSPTK.E	0.00400000000000000000000000000.0	409
IPI00197684	Tax_Id=10116 Gene_Symbol=Xpnpep2 Membrane-bound aminopeptidase P	43	53	R.LPVTAVgNTTMR.L	0.00000040000.0	49
IPI00197684	Tax_Id=10116 Gene_Symbol=Xpnpep2 Membrane-bound aminopeptidase P	64	84	K.SgNLSAYIIPDTDAHMSEYIGK.H	0.040000000000000000000.0	65
IPI00198021	Tax_Id=10116 Gene_Symbol=Umod Uromodulin precursor	322	335	K.QDFgNVTDVSLLEHR.L	0.00040000000000.0	325
IPI00198021	Tax_Id=10116 Gene_Symbol=Umod Uromodulin precursor	440	458	K.TSLQPMVSALgNISLGGTGK.F	0.0000000000400000000.0	450
IPI00198327	Tax_Id=10116 Gene_Symbol=Vdac2 Voltage-dependent anion-selective channel protein 2	187	209	R.TGDFQLHTNVNgNGTEFGGSIYQK.V	0.00000000000400000000000.0	198
IPI00198405	Tax_Id=10116 Gene_Symbol=Arsb Arylsulfatase B	156	186	R.GFDTYFGYLLGSEDYYTHEACAPIECLgNGTR.C	0.0000000000000000000000000004000.0	183
IPI00198405	Tax_Id=10116 Gene_Symbol=Arsb Arylsulfatase B	260	277	R.IYAGMVSLLDEAVGgNVTK.A	0.000000000000004000.0	274
IPI00198667	Tax_Id=10116 Gene_Symbol=Clu Clusterin precursor	324	335	R.QELgNDSLQVAER.L	0.000400000000.0	327
IPI00198685	Tax_Id=10116 Gene_Symbol=Pak1 Serine/threonine-protein kinase PAK 1	471	488	R.ALYLIATgNGTPELQNPEK.L	0.000000040000000000.0	478
IPI00198717	Tax_Id=10116 Gene_Symbol=Mdh1 Malate dehydrogenase, cytoplasmic	180	199	K.NVIIWGgNHSSTQYPDVNHAK.V	0.00000040000000000000.0	186
IPI00199305	Tax_Id=10116 Gene_Symbol=Atp6v1b2 Vacuolar ATP synthase subunit B, brain isoform	131	163	R.VFgNGSGKPIDRGPVVLAEDFLDIMGQPINPQCR.I	0.004000000000000000000000000000000.0	133
IPI00199305	Tax_Id=10116 Gene_Symbol=Atp6v1b2 Vacuolar ATP synthase subunit B, brain isoform	345	381	R.gNGSITQIPILTMPNDDITHPIPDLTGYITEGQIYVDR.Q	0.4000000000000000000000000000000000000.0	345
IPI00199448	Tax_Id=10116 Gene_Symbol=Lgals3bp Mama	396	407	R.SLgNLTEDVYKPR.L	0.004000000000.0	398
IPI00199448	Tax_Id=10116 Gene_Symbol=Lgals3bp Mama	64	76	R.ALGYEgNATQALSR.A	0.0000040000000.0	69
IPI00199465	Tax_Id=10116 Gene_Symbol=Gls Glutaminase kidney isoform, mitochondrial precursor	643	668	K.ILQEYQVQYTPQGDSDDGKEgNQTVHK.N	0.00000000000000000000400000.0	663
IPI00199585	Tax_Id=10116 Gene_Symbol=Slc22a5 Organic cation/carnitine transporter 2	50	63	R.CLVPHTVgNLSSAWR.N	0.00000004000000.0	57
IPI00199585	Tax_Id=10116 Gene_Symbol=Slc22a5 Organic cation/carnitine transporter 2	86	101	R.LATIAgNFSALGLEPGR.D	0.0000040000000000.0	91
IPI00199607	Tax_Id=10116 Gene_Symbol=Ceacam1_v4;Ceacam1_v1;Ceacam1;Ceacam1_v3 carcinoembryonic antigen-related cell adhesion molecule isoform 2	368	378	R.MTLSQDgNSTLR.I	0.00000040000.0	374
IPI00199861	Tax_Id=10116 Gene_Symbol=Dcn Decorin precursor	202	227	R.ISDTgNITAIPQGLPTSISELHLDGNK.I	0.00004000000000000000000000.0	206
IPI00199867	Tax_Id=10116 Gene_Symbol=Emilin1_predicted elastin microfibril interfacer 1	450	459	K.LEVLLAgNVSR.E	0.0000004000.0	456
IPI00199867	Tax_Id=10116 Gene_Symbol=Emilin1_predicted elastin microfibril interfacer 1	561	578	R.LgNLTAAQLSQLEGLLQAR.G	0.040000000000000000.0	562
IPI00199867	Tax_Id=10116 Gene_Symbol=Emilin1_predicted elastin microfibril interfacer 1	765	779	R.ESgNSTSLTQAALLEK.L	0.004000000000000.0	767
IPI00199867	Tax_Id=10116 Gene_Symbol=Emilin1_predicted elastin microfibril interfacer 1	791	804	R.LGALgNSSLLLLEDR.L	0.00004000000000.0	795
IPI00200067	Tax_Id=10116 Gene_Symbol=F11r Junctional adhesion molecule A precursor	182	193	R.AFIgNSSYTIDPK.S	0.000400000000.0	185
IPI00200591	Tax_Id=10116 Gene_Symbol=LOC299282 Serine protease inhibitor A3L precursor	174	187	K.KLINDYVSgNQTQGK.I	0.00000000400000.0	182
IPI00200591	Tax_Id=10116 Gene_Symbol=LOC299282 Serine protease inhibitor A3L precursor	175	187	K.LINDYVSgNQTQGK.I	0.0000000400000.0	182
IPI00200591	Tax_Id=10116 Gene_Symbol=LOC299282 Serine protease inhibitor A3L precursor	175	187	K.LINDYVSgNQTQGK.I	0.0040000400000.0	182
IPI00200591	Tax_Id=10116 Gene_Symbol=LOC299282 Serine protease inhibitor A3L precursor	215	232	K.VPFNPgNDTFESEFYLDEK.R	0.000004000000000000.0	220
IPI00200591	Tax_Id=10116 Gene_Symbol=LOC299282 Serine protease inhibitor A3L precursor	215	233	K.VPFNPgNDTFESEFYLDEKR.S	0.0000040000000000000.0	220
IPI00200591	Tax_Id=10116 Gene_Symbol=LOC299282 Serine protease inhibitor A3L precursor	264	279	K.YTGgNASALFILPDQGK.M	0.0004000000000000.0	267
IPI00200593	Tax_Id=10116 Gene_Symbol=Serpina3k Serine protease inhibitor A3K precursor	174	187	K.KFINDYVSgNQTQGK.I	0.00000000400000.0	182
IPI00200593	Tax_Id=10116 Gene_Symbol=Serpina3k Serine protease inhibitor A3K precursor	174	187	K.KFINDYVSgNQTQGK.I	0.00040000400000.0	182
IPI00200593	Tax_Id=10116 Gene_Symbol=Serpina3k Serine protease inhibitor A3K precursor	175	187	K.FINDYVSgNQTQGK.I	0.0000000400000.0	182
IPI00200593	Tax_Id=10116 Gene_Symbol=Serpina3k Serine protease inhibitor A3K precursor	175	187	K.FINDYVSgNQTQGK.I	0.0040000400000.0	182
IPI00200593	Tax_Id=10116 Gene_Symbol=Serpina3k Serine protease inhibitor A3K precursor	215	232	K.VPFNPgNDTFESEFYLDEK.R	0.000004000000000000.0	220
IPI00200593	Tax_Id=10116 Gene_Symbol=Serpina3k Serine protease inhibitor A3K precursor	215	233	K.VPFNPgNDTFESEFYLDEKR.S	0.0000040000000000000.0	220
IPI00200593	Tax_Id=10116 Gene_Symbol=Serpina3k Serine protease inhibitor A3K precursor	264	279	K.YTGgNASALFILPDQGK.M	0.0004000000000000.0	267
IPI00200640	Tax_Id=10116 Gene_Symbol=Mucdhl Isoform 1 of Mucin and cadherin-like protein precursor	433	443	R.IEVEAgNNTVTK.D	0.00000400000.0	438
IPI00200757	Tax_Id=10116 Gene_Symbol=Fn1 Isoform 1 of Fibronectin precursor	516	533	R.DQCIVDDITYNVgNDTFHK.R	0.000000000000400000.0	528
IPI00200757	Tax_Id=10116 Gene_Symbol=Fn1 Isoform 1 of Fibronectin precursor	996	1010	K.LDAPTNLQFVgNETDR.T	0.000000000040000.0	1006
IPI00200794	Tax_Id=10116 Gene_Symbol=Dcxr L-xylulose reductase	126	141	R.GVPGAIVgNVSSQASQR.A	0.0000000400000000.0	133
IPI00200998	Tax_Id=10116 Gene_Symbol=Pdzk1 PDZ domain-containing protein 1	172	199	K.AGVLADDHLIEVNGENVEgNASHEEVVEK.V	0.0000000000000000004000000000.0	190
IPI00200998	Tax_Id=10116 Gene_Symbol=Pdzk1 PDZ domain-containing protein 1	333	350	R.FSPLLYCQSQELPgNGSVK.E	0.000000000000040000.0	346
IPI00201120	Tax_Id=10116 Gene_Symbol=Slc5a2 Low affinity Na-dependent glucose transporter SGLT2 delta e trans	243	265	K.DPAVGgNISSTCYQPRPDSYHLLR.D	0.00000400000000000000000.0	248
IPI00201262	Tax_Id=10116 Gene_Symbol=LOC297568;Mug2;Mug1 Alpha-1-inhibitor 3 precursor	1127	1150	K.ALSCLESSWENIEQGGgNGSFVYTK.A	0.000000000000000040000000.0	1143
IPI00201262	Tax_Id=10116 Gene_Symbol=LOC297568;Mug2;Mug1 Alpha-1-inhibitor 3 precursor	290	308	R.LDNNGCSTQEVgNITEFQLK.E	0.0000000000040000000.0	301
IPI00201262	Tax_Id=10116 Gene_Symbol=LOC297568;Mug2;Mug1 Alpha-1-inhibitor 3 precursor	290	308	R.LDNNGCSTQEVgNITEFQLK.E	0.0004000000040000000.0	301
IPI00201262	Tax_Id=10116 Gene_Symbol=LOC297568;Mug2;Mug1 Alpha-1-inhibitor 3 precursor	388	404	R.DAGYTgNATTTDQHGLAK.F	0.00000400000000000.0	393
IPI00201262	Tax_Id=10116 Gene_Symbol=LOC297568;Mug2;Mug1 Alpha-1-inhibitor 3 precursor	867	880	K.SLGNVgNFSVSAEAR.Q	0.00000400000000.0	872
IPI00201262	Tax_Id=10116 Gene_Symbol=LOC297568;Mug2;Mug1 Alpha-1-inhibitor 3 precursor	992	1002	K.YLgNETQQLTEK.I	0.00400000000.0	994
IPI00201413	Tax_Id=10116 Gene_Symbol=Acaa2 3-ketoacyl-CoA thiolase, mitochondrial	242	269	K.EGTVTAGgNASGMSDGAGVVIIASEDAVK.K	0.0000000400000000000000000000.0	249
IPI00201413	Tax_Id=10116 Gene_Symbol=Acaa2 3-ketoacyl-CoA thiolase, mitochondrial	242	270	K.EGTVTAGgNASGMSDGAGVVIIASEDAVKK.H	0.00000004000000000000000000000.0	249
IPI00201489	Tax_Id=10116 Gene_Symbol=Ppif Peptidyl-prolyl cis-trans isomerase, mitochondrial precursor	133	159	K.HVGPGVLSMANAGPNTgNGSQFFICTIK.T	0.000000000000000040000000000.0	149
IPI00201617	Tax_Id=10116 Gene_Symbol=LOC259244;Obp3 Alpha-2u globulin	49	58	R.EKIEEgNGSMR.V	0.0000040000.0	54
IPI00203176	Tax_Id=10116 Gene_Symbol=Tpcn1 Two pore calcium channel protein 1	594	609	R.LSPNCCgNSSTVADAYR.F	0.0000004000000000.0	600
IPI00203214	Tax_Id=10116 Gene_Symbol=Eef2 Elongation factor 2	802	839	R.SNTGGQAFPQCVFDHWQILPGDPFDgNSSRPSQVVAETR.K	0.00000000000000000000000004000000000000.0	827
IPI00203384	Tax_Id=10116 Gene_Symbol=Klkb1 Plasma kallikrein precursor	447	460	R.IYGGILgNLSEITNK.T	0.00000040000000.0	453
IPI00203610	Tax_Id=10116 Gene_Symbol=Tor1aip1 59 kDa protein	336	362	K.HLgNSSLPRPQPAILLLTAAQDAAEVLK.C	0.004000000000000000000000000.0	338
IPI00203641	Tax_Id=10116 Gene_Symbol=Snx27 Isoform 2 of Sorting nexin-27	292	305	K.gNSTTDQVYQAIAAK.V	0.40000000000000.0	292
IPI00204006	Tax_Id=10116 Gene_Symbol=Fbn1 Fibrillin-1	1570	1587	K.AWGTPCELCPPVgNTSEYK.I	0.000000000000400000.0	1582
IPI00204006	Tax_Id=10116 Gene_Symbol=Fbn1 Fibrillin-1	445	458	K.VLPFgNVTDYCQLVR.Y	0.00004000000000.0	449
IPI00204348	Tax_Id=10116 Gene_Symbol=Nt5e 5~-nucleotidase precursor	331	343	R.IKLDgNYSTQELGR.T	0.0000400000000.0	335
IPI00204348	Tax_Id=10116 Gene_Symbol=Nt5e 5~-nucleotidase precursor	344	356	R.TIVYLgNGSAQECR.F	0.0000040000000.0	349
IPI00204451	Tax_Id=10116 Gene_Symbol=Cfi Complement factor I precursor	507	518	R.WGEVDLIGgNCSR.F	0.000000004000.0	515
IPI00204469	Tax_Id=10116 Gene_Symbol=Sult1c2a Sulfotransferase 1C2A	13	36	K.LKEVAGIPLMDPTVNgNWSQIQTFK.A	0.000000000000000400000000.0	28
IPI00204504	Tax_Id=10116 Gene_Symbol=Plvap Plasmalemma vesicle-associated protein	66	85	R.ADNLYSQVVGLSAAQAgNLSK.Q	0.00000000000000004000.0	82
IPI00204504	Tax_Id=10116 Gene_Symbol=Plvap Plasmalemma vesicle-associated protein	86	94	K.QLgNISTLVK.D	0.004000000.0	88
IPI00204772	Tax_Id=10116 Gene_Symbol=Prpf19 Pre-mRNA-processing factor 19	33	56	K.YIAEgNGTDPINNQPLSEEQLIDIK.V	0.000040000000000000000000.0	37
IPI00204776	Tax_Id=10116 Gene_Symbol=Akap8 A-kinase anchor protein 8	163	180	R.gNGSFGGTFNDCRDPTPER.G	0.400000000000000000.0	163
IPI00204808	Tax_Id=10116 Gene_Symbol=Mep1b Meprin A subunit beta precursor	215	228	K.TAFQgNGTESTIITK.I	0.00004000000000.0	219
IPI00204808	Tax_Id=10116 Gene_Symbol=Mep1b Meprin A subunit beta precursor	539	553	K.VGVEAFFPgNGTQFSR.G	0.000000004000000.0	547
IPI00204867	Tax_Id=10116 Gene_Symbol=Ltbp4 178 kDa protein	351	366	R.VgNGSCVDVDECATGGR.C	0.0400000000000000.0	352
IPI00205018	Tax_Id=10116 Gene_Symbol=Aldh6a1 Methylmalonate-semialdehyde dehydrogenase [acylating], mitochondrial precursor	439	460	K.IVNDNPYGgNGTAIFTTNGAIAR.K	0.0000000040000000000000.0	447
IPI00205018	Tax_Id=10116 Gene_Symbol=Aldh6a1 Methylmalonate-semialdehyde dehydrogenase [acylating], mitochondrial precursor	439	460	K.IVNDNPYGgNGTAIFTTNGAIAR.K	0.0000000040000000400000.0	447
IPI00205018	Tax_Id=10116 Gene_Symbol=Aldh6a1 Methylmalonate-semialdehyde dehydrogenase [acylating], mitochondrial precursor	439	460	K.IVNDNPYGgNGTAIFTTNGAIAR.K	0.0040000040000000400000.0	447
IPI00205203	Tax_Id=10116 Gene_Symbol=Olr79 olfactory receptor Olr79	2	12	M.SVIgNDSSLYPR.F	0.00040000000.0	5
IPI00205325	Tax_Id=10116 Gene_Symbol=Lrp2 Low-density lipoprotein receptor-related protein 2 precursor	1162	1194	R.CISPLYVCDGDKDCADGSDEAGCVLgNCTSAQFK.C	0.000000000000000000000000040000000.0	1187
IPI00205325	Tax_Id=10116 Gene_Symbol=Lrp2 Low-density lipoprotein receptor-related protein 2 precursor	141	163	R.NCHYPTCDQLTCANGACYgNTSQR.C	0.00000000000000000040000.0	159
IPI00205325	Tax_Id=10116 Gene_Symbol=Lrp2 Low-density lipoprotein receptor-related protein 2 precursor	141	163	R.NCHYPTCDQLTCANGACYgNTSQR.C	0.00000000000004000040000.0	159
IPI00205325	Tax_Id=10116 Gene_Symbol=Lrp2 Low-density lipoprotein receptor-related protein 2 precursor	141	163	R.NCHYPTCDQLTCANGACYgNTSQR.C	0.40000000000000000040000.0	159
IPI00205325	Tax_Id=10116 Gene_Symbol=Lrp2 Low-density lipoprotein receptor-related protein 2 precursor	141	163	R.NCHYPTCDQLTCANGACYgNTSQR.C	0.40000000000004000040000.0	159
IPI00205325	Tax_Id=10116 Gene_Symbol=Lrp2 Low-density lipoprotein receptor-related protein 2 precursor	1491	1501	K.TWSVFQgNGTDK.R	0.00000040000.0	1497
IPI00205325	Tax_Id=10116 Gene_Symbol=Lrp2 Low-density lipoprotein receptor-related protein 2 precursor	1491	1502	K.TWSVFQgNGTDKR.V	0.000000400000.0	1497
IPI00205325	Tax_Id=10116 Gene_Symbol=Lrp2 Low-density lipoprotein receptor-related protein 2 precursor	172	186	R.DSSDEAgNCTTLCSQK.E	0.000000400000000.0	178
IPI00205325	Tax_Id=10116 Gene_Symbol=Lrp2 Low-density lipoprotein receptor-related protein 2 precursor	172	198	R.DSSDEAgNCTTLCSQKEFECGSGECILR.A	0.000000400000000000000000000.0	178
IPI00205325	Tax_Id=10116 Gene_Symbol=Lrp2 Low-density lipoprotein receptor-related protein 2 precursor	1723	1743	R.HYSCACPSGWgNLSDDSVNCVR.G	0.000000000040000000000.0	1733
IPI00205325	Tax_Id=10116 Gene_Symbol=Lrp2 Low-density lipoprotein receptor-related protein 2 precursor	2382	2400	K.SCATSQEDFLIYSLgNNSLR.S	0.0000000000000040000.0	2396
IPI00205325	Tax_Id=10116 Gene_Symbol=Lrp2 Low-density lipoprotein receptor-related protein 2 precursor	2481	2501	R.IYYSDFSgNQTINSMAEDGSNR.A	0.000000040000000000000.0	2488
IPI00205325	Tax_Id=10116 Gene_Symbol=Lrp2 Low-density lipoprotein receptor-related protein 2 precursor	2481	2501	R.IYYSDFSgNQTINSMAEDGSNR.A	0.000000040000010000000.0	2488
IPI00205325	Tax_Id=10116 Gene_Symbol=Lrp2 Low-density lipoprotein receptor-related protein 2 precursor	278	304	R.CISIDKVCDGVPDCPEGDDENgNVTSGR.T	0.000000000000000000000400000.0	299
IPI00205325	Tax_Id=10116 Gene_Symbol=Lrp2 Low-density lipoprotein receptor-related protein 2 precursor	278	304	R.CISIDKVCDGVPDCPEGDDENgNVTSGR.T	0.000000000000000000004400000.0	299
IPI00205325	Tax_Id=10116 Gene_Symbol=Lrp2 Low-density lipoprotein receptor-related protein 2 precursor	2780	2793	R.NCgNSTTEFTCSNGR.C	0.00400000000000.0	2782
IPI00205325	Tax_Id=10116 Gene_Symbol=Lrp2 Low-density lipoprotein receptor-related protein 2 precursor	2780	2793	R.NCgNSTTEFTCSNGR.C	0.00400000000400.0	2782
IPI00205325	Tax_Id=10116 Gene_Symbol=Lrp2 Low-density lipoprotein receptor-related protein 2 precursor	2780	2793	R.NCgNSTTEFTCSNGR.C	0.40400000000400.0	2782
IPI00205325	Tax_Id=10116 Gene_Symbol=Lrp2 Low-density lipoprotein receptor-related protein 2 precursor	284	304	K.VCDGVPDCPEGDDENgNVTSGR.T	0.000000000000000400000.0	299
IPI00205325	Tax_Id=10116 Gene_Symbol=Lrp2 Low-density lipoprotein receptor-related protein 2 precursor	284	304	K.VCDGVPDCPEGDDENgNVTSGR.T	0.000000000000004400000.0	299
IPI00205325	Tax_Id=10116 Gene_Symbol=Lrp2 Low-density lipoprotein receptor-related protein 2 precursor	2967	2993	R.CIPQYWVCDGDADCSDALDELQgNCTMR.T	0.000000000000000000000040000.0	2989
IPI00205325	Tax_Id=10116 Gene_Symbol=Lrp2 Low-density lipoprotein receptor-related protein 2 precursor	305	343	R.TCGMGVCSVLNCEYQCHQTPFGGECFCPPGHIINSgNDSR.T	0.000000000000000000000000000000000404000.0	340
IPI00205325	Tax_Id=10116 Gene_Symbol=Lrp2 Low-density lipoprotein receptor-related protein 2 precursor	3307	3326	R.KMIAQHCVDAgNNTFCFEHPR.G	0.00000000004000000000.0	3317
IPI00205325	Tax_Id=10116 Gene_Symbol=Lrp2 Low-density lipoprotein receptor-related protein 2 precursor	3308	3326	K.MIAQHCVDAgNNTFCFEHPR.G	0.0000000004000000000.0	3317
IPI00205325	Tax_Id=10116 Gene_Symbol=Lrp2 Low-density lipoprotein receptor-related protein 2 precursor	3444	3463	R.VVLVgNTTHKPFDIHVYHPYR.Q	0.00004000000000000000.0	3448
IPI00205325	Tax_Id=10116 Gene_Symbol=Lrp2 Low-density lipoprotein receptor-related protein 2 precursor	3564	3577	R.DGgNCTSPQALCNAR.Q	0.00400000000000.0	3566
IPI00205325	Tax_Id=10116 Gene_Symbol=Lrp2 Low-density lipoprotein receptor-related protein 2 precursor	3564	3577	R.DGgNCTSPQALCNAR.Q	0.00400000000400.0	3566
IPI00205325	Tax_Id=10116 Gene_Symbol=Lrp2 Low-density lipoprotein receptor-related protein 2 precursor	447	479	K.VFSTDINGLNTQEILgNVSVDTPENLAVDWINNK.L	0.000000000000000400000000000000000.0	462
IPI00205325	Tax_Id=10116 Gene_Symbol=Lrp2 Low-density lipoprotein receptor-related protein 2 precursor	447	479	K.VFSTDINGLNTQEILgNVSVDTPENLAVDWINNK.L	0.000000400000000400000000000000000.0	462
IPI00205325	Tax_Id=10116 Gene_Symbol=Lrp2 Low-density lipoprotein receptor-related protein 2 precursor	655	678	R.QPgNATNPCGSNNGGCAQVCVLSHR.T	0.004000000004000000000000.0	657
IPI00205325	Tax_Id=10116 Gene_Symbol=Lrp2 Low-density lipoprotein receptor-related protein 2 precursor	655	678	R.QPgNATNPCGSNNGGCAQVCVLSHR.T	0.004000000040000000000000.0	657
IPI00205325	Tax_Id=10116 Gene_Symbol=Lrp2 Low-density lipoprotein receptor-related protein 2 precursor	853	882	R.AWSDGSHLMPIVgNTSLGWPNGLAIDWSASR.L	0.000000000000400000000000000000.0	865
IPI00205333	Tax_Id=10116 Gene_Symbol=Gpr116 Probable G-protein coupled receptor 116 precursor	245	258	K.ANEQVIQNLgNQTYK.M	0.00000000040000.0	254
IPI00205374	Tax_Id=10116 Gene_Symbol=Hmgcl Hydroxymethylglutaryl-CoA lyase, mitochondrial precursor	138	149	K.NVgNCSIEESFQR.F	0.004000000000.0	140
IPI00205668	Tax_Id=10116 Gene_Symbol=Nphs1 Isoform 1 of Nephrin precursor	712	725	R.ILSGGALQLWgNVTR.A	0.00000000004000.0	722
IPI00206254	Tax_Id=10116 Gene_Symbol=Ggt1 Gamma-glutamyltranspeptidase 1 precursor	112	122	R.LAgNTSMFgNNSK.D	0.00400004000.0	114119
IPI00206254	Tax_Id=10116 Gene_Symbol=Ggt1 Gamma-glutamyltranspeptidase 1 precursor	112	122	R.LAgNTSMFgNNSK.D	0.00400104000.0	114119
IPI00206254	Tax_Id=10116 Gene_Symbol=Ggt1 Gamma-glutamyltranspeptidase 1 precursor	112	138	R.LANTSMFgNNSKDSEEGGLSVAVPGEIR.G	0.000000044000000000000000000.0	119
IPI00206254	Tax_Id=10116 Gene_Symbol=Ggt1 Gamma-glutamyltranspeptidase 1 precursor	112	138	R.LANTSMFgNNSKDSEEGGLSVAVPGEIR.G	0.000001044000000000000000000.0	119
IPI00206254	Tax_Id=10116 Gene_Symbol=Ggt1 Gamma-glutamyltranspeptidase 1 precursor	112	138	R.LAgNTSMFNNSKDSEEGGLSVAVPGEIR.G	0.004000004000000000000000000.0	114
IPI00206254	Tax_Id=10116 Gene_Symbol=Ggt1 Gamma-glutamyltranspeptidase 1 precursor	112	138	R.LAgNTSMFgNNSKDSEEGGLSVAVPGEIR.G	0.004001040000000000000000000.0	114119
IPI00206254	Tax_Id=10116 Gene_Symbol=Ggt1 Gamma-glutamyltranspeptidase 1 precursor	226	238	R.AFYgNGSLTAQIVK.D	0.0004000000000.0	229
IPI00206254	Tax_Id=10116 Gene_Symbol=Ggt1 Gamma-glutamyltranspeptidase 1 precursor	411	446	R.VSGILFNDEMDDFSSPgNFTNQFGVAPSPANFIKPGK.Q	0.000000000000000040000000000000000000.0	427
IPI00206254	Tax_Id=10116 Gene_Symbol=Ggt1 Gamma-glutamyltranspeptidase 1 precursor	503	516	R.LHNQLLPgNTTTVEK.N	0.00000004000000.0	510
IPI00206254	Tax_Id=10116 Gene_Symbol=Ggt1 Gamma-glutamyltranspeptidase 1 precursor	503	516	R.LHNQLLPgNTTTVEK.N	0.00400004000000.0	510
IPI00206268	Tax_Id=10116 Gene_Symbol=- 32 kDa protein	187	209	R.TGDFQLHTNVNgNGTEFGGSIYQK.K	0.00000000000400000000000.0	198
IPI00206268	Tax_Id=10116 Gene_Symbol=- 32 kDa protein	88	109	K.WNTgNNTLGTEIAIENQICQGLK.L	0.0004000000000040000000.0	91
IPI00206298	Tax_Id=10116 Gene_Symbol=Lgmn Legumain precursor	61	99	R.NGIPDEQIIVMMYDDIANNEENPTPGVVINRPgNGTDVYK.G	0.000000000000000000000000000000004000000.0	93
IPI00206298	Tax_Id=10116 Gene_Symbol=Lgmn Legumain precursor	61	99	R.NGIPDEQIIVMMYDDIANNEENPTPGVVINRPgNGTDVYK.G	0.400000000000000000000000000000004000000.0	93
IPI00206298	Tax_Id=10116 Gene_Symbol=Lgmn Legumain precursor	61	99	R.NGIPDEQIIVMMYDDIANNEENPTPGVVINRPgNGTDVYK.G	0.400000000000000000000000000004004000000.0	93
IPI00206336	Tax_Id=10116 Gene_Symbol=Lamp1 Lysosome-associated membrane glycoprotein 1 precursor	57	70	K.VSgNMTLPASAEVLK.N	0.00400000000000.0	59
IPI00206336	Tax_Id=10116 Gene_Symbol=Lamp1 Lysosome-associated membrane glycoprotein 1 precursor	57	70	K.VSgNMTLPASAEVLK.N	0.00410000000000.0	59
IPI00206403	Tax_Id=10116 Gene_Symbol=Lum Lumican precursor	85	106	K.AFEgNVTDLQWLILDHNLLENSK.I	0.0004000000000000000000.0	88
IPI00206467	Tax_Id=10116 Gene_Symbol=Pecam Platelet endothelial cell adhesion molecule precursor	413	432	K.GQIIGISCQSVgNGTAPITYR.L	0.00000000000400000000.0	424
IPI00206668	Tax_Id=10116 Gene_Symbol=Entpd1 Ectonucleoside triphosphate diphosphohydrolase 1	289	302	K.VVgNVSELYGTPCTK.R	0.00400000000000.0	291
IPI00206823	Tax_Id=10116 Gene_Symbol=Obp3 Alpha-2u globulin	49	58	R.EKIEEgNGSMR.V	0.0000040000.0	54
IPI00207217	Tax_Id=10116 Gene_Symbol=Echs1 Enoyl-CoA hydratase, mitochondrial precursor	44	56	K.gNSSVGLIQLNRPK.A	0.4000000000000.0	44
IPI00207480	Tax_Id=10116 Gene_Symbol=RGD1565180_predicted hypothetical protein LOC363158	358	371	R.LEAVQFFgNVTTLQK.E	0.00000004000000.0	365
IPI00207668	Tax_Id=10116 Gene_Symbol=Afm Afamin precursor	396	407	R.HAEDKFgNETTER.S	0.000000400000.0	402
IPI00207702	Tax_Id=10116 Gene_Symbol=Slc22a8 Solute carrier family 22 member 8	91	105	R.ATEPCLDGWIYgNSTR.D	0.000000000004000.0	102
IPI00208205	Tax_Id=10116 Gene_Symbol=Hspa8 Heat shock cognate 71 kDa protein	138	155	K.TVTNAVVTVPAYFgNDSQR.Q	0.000000000000040000.0	151
IPI00208205	Tax_Id=10116 Gene_Symbol=Hspa8 Heat shock cognate 71 kDa protein	57	71	K.NQVAMgNPTNTVFDAK.R	0.000014000000000.0	62
IPI00208205	Tax_Id=10116 Gene_Symbol=Hspa8 Heat shock cognate 71 kDa protein	57	71	K.NQVAMgNPTNTVFDAK.R	0.400014000000000.0	62
IPI00208205	Tax_Id=10116 Gene_Symbol=Hspa8 Heat shock cognate 71 kDa protein	574	597	K.CNEIISWLDKgNQTAEKEEFEHQQK.E	0.000000000040000000000000.0	584
IPI00208215	Tax_Id=10116 Gene_Symbol=Prdx3 Thioredoxin-dependent peroxide reductase, mitochondrial precursor	151	167	K.NGGLGHMgNITLLSDLTK.Q	0.00000014000000000.0	158
IPI00208306	Tax_Id=10116 Gene_Symbol=Tpt1 Translationally-controlled tumor protein	39	85	R.TEGAIDDSLIGGgNASAEGPEGEGTESTVVTGVDIVMNHHLQETSFTK.E	0.00000000000040000000000000000000000000000000000.0	51
IPI00208382	Tax_Id=10116 Gene_Symbol=Ppt1 Palmitoyl-protein thioesterase 1 precursor	230	248	K.FFgNDSIVDPVDSEWFGFYR.S	0.0040000000000000000.0	232
IPI00208422	Tax_Id=10116 Gene_Symbol=Dpp4 Dipeptidyl peptidase 4	146	161	K.IPgNNTQWITWSQEGHK.L	0.0040000000000000.0	148
IPI00208422	Tax_Id=10116 Gene_Symbol=Dpp4 Dipeptidyl peptidase 4	514	524	K.KLDFIVLgNETR.F	0.00000004000.0	521
IPI00208422	Tax_Id=10116 Gene_Symbol=Dpp4 Dipeptidyl peptidase 4	515	524	K.LDFIVLgNETR.F	0.0000004000.0	521
IPI00208917	Tax_Id=10116 Gene_Symbol=Aldh7a1 similar to aldehyde dehydrogenase family 7, member A1	49	62	R.EDNEGVFgNGSWGGR.G	0.00000004000000.0	56
IPI00208938	Tax_Id=10116 Gene_Symbol=RGD1309472 Proton-coupled folate transporter	51	61	R.ISTELGYgNGTR.H	0.00000004000.0	58
IPI00209258	Tax_Id=10116 Gene_Symbol=Spna2 Spectrin alpha chain, brain	2317	2327	R.gNTTGVTEEALK.E	0.40000000000.0	2317
IPI00209258	Tax_Id=10116 Gene_Symbol=Spna2 Spectrin alpha chain, brain	614	627	K.HQAFEAELSAgNQSR.I	0.00000000004000.0	624
IPI00210090	Tax_Id=10116 Gene_Symbol=Hnrpu SP120	38	68	R.LQAALDNEAGGRPAMEPGgNGSLDLGGDAAGR.S	0.0000000000000000004000000000000.0	56
IPI00210090	Tax_Id=10116 Gene_Symbol=Hnrpu SP120	38	68	R.LQAALDNEAGGRPAMEPGgNGSLDLGGDAAGR.S	0.0000000000000010004000000000000.0	56
IPI00210090	Tax_Id=10116 Gene_Symbol=Hnrpu SP120	38	68	R.LQAALDNEAGGRPAMEPGgNGSLDLGGDAAGR.S	0.0000004000000000004000000000000.0	56
IPI00210234	Tax_Id=10116 Gene_Symbol=Pls3 Plastin-3	516	534	K.ATDDIIVNWVgNGTLSEAGK.S	0.0000000000400000000.0	526
IPI00210381	Tax_Id=10116 Gene_Symbol=Rab11b Ras-related protein Rab-11B	146	166	K.NgNLSFIETSALDSTNVEEAFK.N	0.040000000000000000000.0	147
IPI00210435	Tax_Id=10116 Gene_Symbol=Pc Pyruvate carboxylase, mitochondrial precursor	407	428	R.LDgNASAFQGAVISPHYDSLLVK.V	0.0040000000000000000000.0	409
IPI00210824	Tax_Id=10116 Gene_Symbol=Serpina6 Corticosteroid-binding globulin precursor	306	328	K.DVLEDLNIKDLLTgNQSDFSGNTK.D	0.00000000000004000000000.0	319
IPI00210824	Tax_Id=10116 Gene_Symbol=Serpina6 Corticosteroid-binding globulin precursor	315	328	K.DLLTgNQSDFSGNTK.D	0.00004000000000.0	319
IPI00210872	Tax_Id=10116 Gene_Symbol=Mep1a Meprin A subunit alpha precursor	535	552	K.YQTSSAIgNGSVIWDRPTK.V	0.000000040000000000.0	542
IPI00210900	Tax_Id=10116 Gene_Symbol=Ambp AMBP protein precursor	226	245	K.KEDSCQLgNYSEGPCLGMQQK.Y	0.00000004000000000000.0	233
IPI00210900	Tax_Id=10116 Gene_Symbol=Ambp AMBP protein precursor	226	245	K.KEDSCQLgNYSEGPCLGMQQK.Y	0.00000004000000001000.0	233
IPI00210900	Tax_Id=10116 Gene_Symbol=Ambp AMBP protein precursor	227	245	K.EDSCQLgNYSEGPCLGMQQK.Y	0.0000004000000000000.0	233
IPI00210975	Tax_Id=10116 Gene_Symbol=Hyou1 Hypoxia up-regulated protein 1 precursor	510	520	R.VFGSQgNLTTVK.L	0.00000400000.0	515
IPI00210975	Tax_Id=10116 Gene_Symbol=Hyou1 Hypoxia up-regulated protein 1 precursor	822	837	R.LSALDNLLgNHSSIFLK.G	0.0000000040000000.0	830
IPI00211023	Tax_Id=10116 Gene_Symbol=Slc12a4 Solute carrier family 12 member 4	328	339	K.TVVVDgNETVATR.L	0.000004000000.0	333
IPI00211075	Tax_Id=10116 Gene_Symbol=Serpina3n Serine protease inhibitor A3N precursor	103	115	K.FgNLTETPETEIHR.G	0.0400000000000.0	104
IPI00211075	Tax_Id=10116 Gene_Symbol=Serpina3n Serine protease inhibitor A3N precursor	244	265	K.LEDLTTPYVRDEELgNCTVVELK.Y	0.0000000000000040000000.0	258
IPI00211075	Tax_Id=10116 Gene_Symbol=Serpina3n Serine protease inhibitor A3N precursor	254	265	R.DEELgNCTVVELK.Y	0.000040000000.0	258
IPI00211075	Tax_Id=10116 Gene_Symbol=Serpina3n Serine protease inhibitor A3N precursor	266	281	K.YTGgNASALFILPDQGK.M	0.0004000000000000.0	269
IPI00211096	Tax_Id=10116 Gene_Symbol=Hsd11b1 Isoform 11-HSD1A of Corticosteroid 11-beta-dehydrogenase isozyme 1	156	170	K.QSgNGSIAIISSMAGK.M	0.004000000000000.0	158
IPI00211593	Tax_Id=10116 Gene_Symbol=Sod2 Superoxide dismutase [Mn], mitochondrial precursor	54	75	K.HHATYVNNLgNVTEEKYHEALAK.G	0.0000000004000000000000.0	63
IPI00211616	Tax_Id=10116 Gene_Symbol=Slc3a2 4F2 cell-surface antigen heavy chain	247	262	K.LAgNASLYLAEWQgNITK.N	0.0040000000004000.0	249259
IPI00211616	Tax_Id=10116 Gene_Symbol=Slc3a2 4F2 cell-surface antigen heavy chain	247	268	K.LAgNASLYLAEWQgNITKgNFSEDR.L	0.0040000000004000400000.0	249259263
IPI00211648	Tax_Id=10116 Gene_Symbol=Slc3a1 Neutral and basic amino acid transport protein rBAT	321	339	K.DLRNEIQVgNTSQIPDTVTR.Y	0.0000000040000000000.0	329
IPI00211648	Tax_Id=10116 Gene_Symbol=Slc3a1 Neutral and basic amino acid transport protein rBAT	324	339	R.NEIQVgNTSQIPDTVTR.Y	0.0000040000000000.0	329
IPI00211648	Tax_Id=10116 Gene_Symbol=Slc3a1 Neutral and basic amino acid transport protein rBAT	324	339	R.NEIQVgNTSQIPDTVTR.Y	0.4000040000000000.0	329
IPI00211648	Tax_Id=10116 Gene_Symbol=Slc3a1 Neutral and basic amino acid transport protein rBAT	504	539	K.SPMQWDNSSNAGFTEAgNHTWLPTNSDYHTVNVDVQK.T	0.000000000000000040000000000000000000.0	520
IPI00211648	Tax_Id=10116 Gene_Symbol=Slc3a1 Neutral and basic amino acid transport protein rBAT	504	539	K.SPMQWDNSSNAGFTEAgNHTWLPTNSDYHTVNVDVQK.T	0.000000000000000040000004000000000000.0	520
IPI00211648	Tax_Id=10116 Gene_Symbol=Slc3a1 Neutral and basic amino acid transport protein rBAT	504	539	K.SPMQWDNSSNAGFTEAgNHTWLPTNSDYHTVNVDVQK.T	0.000000000400000040000000000000000000.0	520
IPI00211648	Tax_Id=10116 Gene_Symbol=Slc3a1 Neutral and basic amino acid transport protein rBAT	504	539	K.SPMQWDNSSNAGFTEAgNHTWLPTNSDYHTVNVDVQK.T	0.001000000000000040000000000000000000.0	520
IPI00211648	Tax_Id=10116 Gene_Symbol=Slc3a1 Neutral and basic amino acid transport protein rBAT	504	539	K.SPMQWDgNSSNAGFTEANHTWLPTNSDYHTVNVDVQK.T	0.000000400000000000000000000000000000.0	510
IPI00211648	Tax_Id=10116 Gene_Symbol=Slc3a1 Neutral and basic amino acid transport protein rBAT	504	539	K.SPMQWDgNSSNAGFTEANHTWLPTNSDYHTVNVDVQK.T	0.000000400000000000000004000000000000.0	510
IPI00211648	Tax_Id=10116 Gene_Symbol=Slc3a1 Neutral and basic amino acid transport protein rBAT	504	539	K.SPMQWDgNSSNAGFTEANHTWLPTNSDYHTVNVDVQK.T	0.000000400400000000000000000000000000.0	510
IPI00211648	Tax_Id=10116 Gene_Symbol=Slc3a1 Neutral and basic amino acid transport protein rBAT	504	539	K.SPMQWDgNSSNAGFTEAgNHTWLPTNSDYHTVNVDVQK.T	0.000000400000000040000000000000000000.0	510520
IPI00211648	Tax_Id=10116 Gene_Symbol=Slc3a1 Neutral and basic amino acid transport protein rBAT	504	539	K.SPMQWDgNSSNAGFTEAgNHTWLPTNSDYHTVNVDVQK.T	0.000000400400000040000000000000000000.0	510520
IPI00211648	Tax_Id=10116 Gene_Symbol=Slc3a1 Neutral and basic amino acid transport protein rBAT	504	539	K.SPMQWDgNSSNAGFTEAgNHTWLPTNSDYHTVNVDVQK.T	0.001000400000000040000000000000000000.0	510520
IPI00211989	Tax_Id=10116 Gene_Symbol=Khk Isoform C of Ketohexokinase	79	108	R.RGVDVSQVAWQSQGDTPCSCCIVNNSgNGSR.T	0.000000000000000000000000004000.0	105
IPI00211989	Tax_Id=10116 Gene_Symbol=Khk Isoform C of Ketohexokinase	80	108	R.GVDVSQVAWQSQGDTPCSCCIVNNSgNGSR.T	0.00000000000000000000000004000.0	105
IPI00211989	Tax_Id=10116 Gene_Symbol=Khk Isoform C of Ketohexokinase	80	108	R.GVDVSQVAWQSQGDTPCSCCIVNNSgNGSR.T	0.00000000000000000000000404000.0	105
IPI00211989	Tax_Id=10116 Gene_Symbol=Khk Isoform C of Ketohexokinase	80	108	R.GVDVSQVAWQSQGDTPCSCCIVgNNSgNGSR.T	0.00000000000000000000004004000.0	102105
IPI00212516	Tax_Id=10116 Gene_Symbol=Tmed4_predicted transmembrane emp24 protein transport domain containing 4	100	120	R.FTFTSHTPGDHQICLHSgNSTR.M	0.000000000000000004000.0	117
IPI00212546	Tax_Id=10116 Gene_Symbol=Emb Embigin precursor	105	120	K.KDDALLETTDGFgNTTK.M	0.0000000000004000.0	117
IPI00212546	Tax_Id=10116 Gene_Symbol=Emb Embigin precursor	106	120	K.DDALLETTDGFgNTTK.M	0.000000000004000.0	117
IPI00212666	Tax_Id=10116 Gene_Symbol=Mug1 Isoform 1 of Murinoglobulin-1 precursor	1002	1012	K.YLgNETQQLTEK.I	0.00400000000.0	1004
IPI00212666	Tax_Id=10116 Gene_Symbol=Mug1 Isoform 1 of Murinoglobulin-1 precursor	386	404	K.AQEAGYTgNATTTDQHGLAK.F	0.0000000400000000000.0	393
IPI00212708	Tax_Id=10116 Gene_Symbol=Fetub Fetub protein	146	162	R.RVLYLPAYgNCTLRPVSK.R	0.00000000400000000.0	154
IPI00212708	Tax_Id=10116 Gene_Symbol=Fetub Fetub protein	147	162	R.VLYLPAYgNCTLRPVSK.R	0.0000000400000000.0	154
IPI00212725	Tax_Id=10116 Gene_Symbol=Cd164 Endolyn precursor	88	101	K.TYCSSELVSgNCTQK.T	0.00000000040000.0	97
IPI00212730	Tax_Id=10116 Gene_Symbol=Lamp2 Lysosome-associated membrane glycoprotein 2 precursor	101	120	K.EASQYFINgNITLSYNTgNDTK.T	0.00000000400000004000.0	109117
IPI00212730	Tax_Id=10116 Gene_Symbol=Lamp2 Lysosome-associated membrane glycoprotein 2 precursor	249	274	K.VPFIFNINPATTgNFTGSCQPQTAQLR.L	0.00000000000040000000000000.0	261
IPI00212731	Tax_Id=10116 Gene_Symbol=Ctsd Cathepsin D precursor	249	261	R.YYHGELSYLgNVTR.K	0.0000000004000.0	258
IPI00212809	Tax_Id=10116 Gene_Symbol=Ctsh Cathepsin H precursor	92	104	K.YLWSEPQgNCSATK.S	0.0000000400000.0	99
IPI00212933	Tax_Id=10116 Gene_Symbol=Slc5a1 Sodium/glucose cotransporter 1	239	252	K.AIPTLVSDGgNITVK.E	0.00000000040000.0	248
IPI00213463	Tax_Id=10116 Gene_Symbol=Actn4 Alpha-actinin-4	675	691	R.ISIEMgNGTLEDQLSHLK.Q	0.00000400000000000.0	680
IPI00213569	Tax_Id=10116 Gene_Symbol=Ugt1a1 UDP-glucuronosyltransferase 1-1 precursor	80	99	R.KYPVPFQNEgNVTAAFVELGR.S	0.00000000040000000000.0	89
IPI00213584	Tax_Id=10116 Gene_Symbol=Agxt2 Alanine--glyoxylate aminotransferase 2, mitochondrial precursor	265	300	R.YIEQFKDTLgNTSVATSIAGFFAEPIQGVNGVVQYPK.E	0.000000000400000000000000000000000000.0	274
IPI00213584	Tax_Id=10116 Gene_Symbol=Agxt2 Alanine--glyoxylate aminotransferase 2, mitochondrial precursor	265	300	R.YIEQFKDTLgNTSVATSIAGFFAEPIQGVNGVVQYPK.E	0.000000000400000000000000000040000000.0	274
IPI00213584	Tax_Id=10116 Gene_Symbol=Agxt2 Alanine--glyoxylate aminotransferase 2, mitochondrial precursor	271	300	K.DTLgNTSVATSIAGFFAEPIQGVNGVVQYPK.E	0.000400000000000000000000000000.0	274
IPI00213584	Tax_Id=10116 Gene_Symbol=Agxt2 Alanine--glyoxylate aminotransferase 2, mitochondrial precursor	271	300	K.DTLgNTSVATSIAGFFAEPIQGVNGVVQYPK.E	0.000400000000000000000040000000.0	274
IPI00214158	Tax_Id=10116 Gene_Symbol=Slc22a6 Renal organic anion transporter 1	101	131	R.VTEPCIDGWVYDgNSTFPSTIVTEWNLVCSHR.A	0.0000000000004000000000000000000.0	113
IPI00214328	Tax_Id=10116 Gene_Symbol=Naglt1 Sodium-dependent glucose transporter 1	186	204	K.LAWGTTASAQgNHTEPQLDR.S	0.0000000000400000000.0	196
IPI00214328	Tax_Id=10116 Gene_Symbol=Naglt1 Sodium-dependent glucose transporter 1	70	85	R.NVNRgNISSLSEIFVGR.A	0.0000400000000000.0	74
IPI00214373	Tax_Id=10116 Gene_Symbol=Aadat Kynurenine/alpha-aminoadipate aminotransferase mitochondrial precursor	50	62	K.SAVFTVEgNGSTIR.F	0.0000000400000.0	57
IPI00214373	Tax_Id=10116 Gene_Symbol=Aadat Kynurenine/alpha-aminoadipate aminotransferase mitochondrial precursor	94	123	K.LHNPPTVgNYSPNEGQMDLCITSGCQDGLCK.V	0.000000040000000000000000000000.0	101
IPI00214787	Tax_Id=10116 Gene_Symbol=Slc16a1 Monocarboxylate transporter 1	473	494	K.ETQSPAPLQgNSSGDPAEEESPV.-	0.0000000004000000000000.0	482
IPI00214859	Tax_Id=10116 Gene_Symbol=Col18a1 similar to Collagen alpha-1(XVIII) chain precursor	587	611	R.DGQQgNISLLYTEPGASQTQTGASFR.L	0.0000400000000000000000000.0	591
IPI00215093	Tax_Id=10116 Gene_Symbol=LOC360975 2-oxoglutarate dehydrogenase E1 component, mitochondrial precursor	365	387	R.NITLSLVAgNPSHLEAADPVVMGK.T	0.00000000400000000000100.0	373
IPI00215243	Tax_Id=10116 Gene_Symbol=Psma7 Isoform RC6-IL of Proteasome subunit alpha type-7	181	195	K.gNYTDDAIETDDLTIK.L	0.400000000000000.0	181
IPI00215357	Tax_Id=10116 Gene_Symbol=Cdh6 Cadherin-6 precursor	394	414	R.EDAQIgNTTIGSVAAQDPDAAR.N	0.000004000000000000000.0	399
IPI00230835	Tax_Id=10116 Gene_Symbol=Ywhag 14-3-3 protein gamma	29	42	K.gNVTELNEPLSNEER.N	0.40000000000000.0	29
IPI00230859	Tax_Id=10116 Gene_Symbol=Akr1a1 Alcohol dehydrogenase	43	61	R.HIDCASVYGgNETEIGEALK.E	0.0000000004000000000.0	52
IPI00230859	Tax_Id=10116 Gene_Symbol=Akr1a1 Alcohol dehydrogenase	43	68	R.HIDCASVYGgNETEIGEALKESVGAGK.A	0.00000000040000000000000000.0	52
IPI00230862	Tax_Id=10116 Gene_Symbol=Anpep Aminopeptidase N	111	125	R.FTCgNETTNVIIIHSK.K	0.000400000000000.0	114
IPI00230862	Tax_Id=10116 Gene_Symbol=Anpep Aminopeptidase N	231	252	K.ASFNITLIHPNgNLTALSNMLPK.D	0.0000000000440000000000.0	242
IPI00230862	Tax_Id=10116 Gene_Symbol=Anpep Aminopeptidase N	231	252	K.ASFgNITLIHPNNLTALSNMLPK.D	0.0004000000400000000000.0	234
IPI00230862	Tax_Id=10116 Gene_Symbol=Anpep Aminopeptidase N	231	252	K.ASFgNITLIHPNgNLTALSNMLPK.D	0.0004000000040000000000.0	234242
IPI00230862	Tax_Id=10116 Gene_Symbol=Anpep Aminopeptidase N	231	252	K.ASFgNITLIHPNgNLTALSNMLPK.D	0.0004000000040000001000.0	234242
IPI00230862	Tax_Id=10116 Gene_Symbol=Anpep Aminopeptidase N	256	273	R.TLQEDPSWgNVTEFHPTPK.M	0.000000004000000000.0	264
IPI00230862	Tax_Id=10116 Gene_Symbol=Anpep Aminopeptidase N	769	792	R.DLVVGLYSQWMgNNSDNNPIHPNLR.S	0.000000000004000000000000.0	780
IPI00230907	Tax_Id=10116 Gene_Symbol=Mif Macrophage migration inhibitory factor	95	115	R.VYINYYDMNAANVGWgNGSTFA.-	0.000000000000000400000.0	110
IPI00230914	Tax_Id=10116 Gene_Symbol=Rpl5 60S ribosomal protein L5	229	241	K.NgNVTPDMMEEMYK.K	0.0400000000000.0	230
IPI00230914	Tax_Id=10116 Gene_Symbol=Rpl5 60S ribosomal protein L5	229	241	K.NgNVTPDMMEEMYK.K	0.0400000000100.0	230
IPI00230941	Tax_Id=10116 Gene_Symbol=Vim Vimentin	451	466	R.DGQVIgNETSQHHDDLE.-	0.0000040000000000.0	456
IPI00230946	Tax_Id=10116 Gene_Symbol=Dpp7 Dipeptidyl-peptidase 2 precursor	318	355	R.ALAGLVYgNSSGMEPCFDIYQMYQSCADPTGCGTGSNAR.A	0.00000004000000000000000000000000000000.0	325
IPI00231028	Tax_Id=10116 Gene_Symbol=RGD1303003 ES1 protein homolog, mitochondrial precursor	140	149	K.gNLSTFAVDGK.D	0.4000000000.0	140
IPI00231139	Tax_Id=10116 Gene_Symbol=Tkt transketolase	376	384	K.gNSTFSELFK.K	0.400000000.0	376
IPI00231359	Tax_Id=10116 Gene_Symbol=Acads Acetyl-Coenzyme A dehydrogenase, short chain	151	173	K.IGCFALSEPGgNGSDAGAASTTAR.E	0.00000000004000000000000.0	161
IPI00231359	Tax_Id=10116 Gene_Symbol=Acads Acetyl-Coenzyme A dehydrogenase, short chain	151	185	K.IGCFALSEPGNGSDAGAASTTAREEGDSWVLgNGTK.A	0.00000000000000000000000000000004000.0	182
IPI00231359	Tax_Id=10116 Gene_Symbol=Acads Acetyl-Coenzyme A dehydrogenase, short chain	151	185	K.IGCFALSEPGgNGSDAGAASTTAREEGDSWVLNGTK.A	0.00000000004000000000000000000000000.0	161
IPI00231478	Tax_Id=10116 Gene_Symbol=Scarb2 Lysosome membrane protein 2	116	134	K.AYIFERgNQSVGDPTVDLIR.T	0.0000004000000000000.0	122
IPI00231478	Tax_Id=10116 Gene_Symbol=Scarb2 Lysosome membrane protein 2	235	262	K.TSLDWWTTDTCNMIgNGTDGDSFHPLISK.D	0.0000000000000040000000000000.0	249
IPI00231478	Tax_Id=10116 Gene_Symbol=Scarb2 Lysosome membrane protein 2	98	115	K.ANVQFGEgNGTTISAVTNK.A	0.000000040000000000.0	105
IPI00231611	Tax_Id=10116 Gene_Symbol=Fh1 Isoform Mitochondrial of Fumarate hydratase, mitochondrial precursor	181	210	K.SQSSgNDTFPTAMHIAAALEVHQVLLPGLQK.L	0.000040000000000000000000000000.0	185
IPI00231641	Tax_Id=10116 Gene_Symbol=Pgm1 Phosphoglucomutase-1	235	277	K.KILCEELGAPANSAVNCVPLEDFGGHHPDPgNLTYAADLVETMK.S	0.0000000000000000000000000000004000000000000.0	265
IPI00231686	Tax_Id=10116 Gene_Symbol=Cd63 CD63 antigen	122	138	K.QMQNYLTDgNKTATILDK.L	0.00000000400000000.0	130
IPI00231686	Tax_Id=10116 Gene_Symbol=Cd63 CD63 antigen	145	156	K.CCGASgNYTDWER.I	0.000004000000.0	150
IPI00231686	Tax_Id=10116 Gene_Symbol=Cd63 CD63 antigen	163	182	K.DRVPDSCCIgNITVGCGNDFK.E	0.00000000040000000000.0	172
IPI00231742	Tax_Id=10116 Gene_Symbol=Cat Catalase	431	444	K.RFNSANEDgNVTQVR.T	0.00000000400000.0	439
IPI00231742	Tax_Id=10116 Gene_Symbol=Cat Catalase	432	444	R.FNSANEDgNVTQVR.T	0.0000000400000.0	439
IPI00231742	Tax_Id=10116 Gene_Symbol=Cat Catalase	481	492	K.gNFTDVHPDYGAR.V	0.400000000000.0	481
IPI00231767	Tax_Id=10116 Gene_Symbol=Tpi1 Triosephosphate isomerase	195	206	K.CgNVSEGVAQCTR.I	0.040000000000.0	196
IPI00231789	Tax_Id=10116 Gene_Symbol=Mme Neprilysin	142	152	R.SCIgNESAIDSR.G	0.00040000000.0	145
IPI00231789	Tax_Id=10116 Gene_Symbol=Mme Neprilysin	199	223	K.VLINFFVGTDDKgNSTQHIIHFDQPR.L	0.0000000000004000000000000.0	211
IPI00231789	Tax_Id=10116 Gene_Symbol=Mme Neprilysin	276	293	K.VMELEKEIAgNATTKPEDR.N	0.000000000400000000.0	285
IPI00231789	Tax_Id=10116 Gene_Symbol=Mme Neprilysin	282	302	K.EIAgNATTKPEDRNDPMLLYNK.M	0.000400000000000000000.0	285
IPI00231988	Tax_Id=10116 Gene_Symbol=Ptprf Leukocyte common antigen-related phosphatase precursor	939	947	R.ITgNYTVVYR.D	0.004000000.0	941
IPI00324019	Tax_Id=10116 Gene_Symbol=Serpina1 Alpha-1-antiproteinase precursor	92	112	R.KQILEGLEFgNLTQIPEADIHK.A	0.000000000400000000000.0	101
IPI00324019	Tax_Id=10116 Gene_Symbol=Serpina1 Alpha-1-antiproteinase precursor	93	112	K.QILEGLEFgNLTQIPEADIHK.A	0.00000000400000000000.0	101
IPI00324302	Tax_Id=10116 Gene_Symbol=Acat1 Acetyl-CoA acetyltransferase, mitochondrial precursor	271	300	K.EgNGTVTAANASTLNDGAAAVVLMTAEAAQR.L	0.040000000000000000000000000000.0	272
IPI00324302	Tax_Id=10116 Gene_Symbol=Acat1 Acetyl-CoA acetyltransferase, mitochondrial precursor	271	300	K.EgNGTVTAANASTLNDGAAAVVLMTAEAAQR.L	0.040000000000000000000010000000.0	272
IPI00324585	Tax_Id=10116 Gene_Symbol=Itga1 Integrin alpha-1 precursor	1112	1124	K.SEgNSSLTLSSSNR.K	0.0040000000000.0	1114
IPI00324585	Tax_Id=10116 Gene_Symbol=Itga1 Integrin alpha-1 precursor	410	427	K.ANQMVIPHgNTTFQTEPAK.M	0.000000004000000000.0	418
IPI00324585	Tax_Id=10116 Gene_Symbol=Itga1 Integrin alpha-1 precursor	458	468	R.YgNHTGQVVIYK.M	0.04000000000.0	459
IPI00324585	Tax_Id=10116 Gene_Symbol=Itga1 Integrin alpha-1 precursor	525	534	K.VYVYAVgNQTR.F	0.0000004000.0	531
IPI00324585	Tax_Id=10116 Gene_Symbol=Itga1 Integrin alpha-1 precursor	813	826	R.CISDLTLgNVSTTEK.S	0.00000004000000.0	820
IPI00324585	Tax_Id=10116 Gene_Symbol=Itga1 Integrin alpha-1 precursor	833	845	K.SQHDKFgNVSLTVK.N	0.0000004000000.0	839
IPI00324585	Tax_Id=10116 Gene_Symbol=Itga1 Integrin alpha-1 precursor	856	886	R.TVVQHSPNLIFSGIEEIQKDSCESNQgNITCR.V	0.0000000000000000000000000040000.0	882
IPI00324585	Tax_Id=10116 Gene_Symbol=Itga1 Integrin alpha-1 precursor	95	110	K.LDLPVgNTSIPNVTEIK.E	0.0000040000000000.0	100
IPI00324585	Tax_Id=10116 Gene_Symbol=Itga1 Integrin alpha-1 precursor	95	110	K.LDLPVgNTSIPgNVTEIK.E	0.0000040000400000.0	100105
IPI00324987	Tax_Id=10116 Gene_Symbol=P2rx4 P2X purinoceptor 4	181	190	K.AAEgNFTLLVK.N	0.0004000000.0	184
IPI00324987	Tax_Id=10116 Gene_Symbol=P2rx4 P2X purinoceptor 4	70	82	K.GVAVTgNTSQLGFR.I	0.0000040000000.0	75
IPI00325312	Tax_Id=10116 Gene_Symbol=Prom1 prominin 1 isoform 1	202	214	K.QIDYILGQYgNTTK.N	0.0000000004000.0	211
IPI00325312	Tax_Id=10116 Gene_Symbol=Prom1 prominin 1 isoform 1	259	269	K.DALQgNMSSSLK.S	0.00004000000.0	263
IPI00325312	Tax_Id=10116 Gene_Symbol=Prom1 prominin 1 isoform 1	273	286	R.DASTQLSTgNLTSVR.N	0.00000000400000.0	281
IPI00325312	Tax_Id=10116 Gene_Symbol=Prom1 prominin 1 isoform 1	540	552	K.NPDIgNMTFEQVYR.D	0.0000400000000.0	544
IPI00325312	Tax_Id=10116 Gene_Symbol=Prom1 prominin 1 isoform 1	708	732	K.VLASLDSAQHFLTSgNLSSIVIGETK.K	0.0000000000000040000000000.0	722
IPI00325847	Tax_Id=10116 Gene_Symbol=Cp GPI-anchored ceruloplasmin	129	144	K.ANEGAIYPDgNTTDFQR.A	0.0000000004000000.0	138
IPI00325860	Tax_Id=10116 Gene_Symbol=Podxl Podocalyxin precursor	423	452	R.LTEELQTVENGYHDgNPTLEVMETPSEMQEK.K	0.000000000000004000000000000000.0	437
IPI00325860	Tax_Id=10116 Gene_Symbol=Podxl Podocalyxin precursor	423	452	R.LTEELQTVENGYHDgNPTLEVMETPSEMQEK.K	0.000000000400004000000000000000.0	437
IPI00325860	Tax_Id=10116 Gene_Symbol=Podxl Podocalyxin precursor	454	485	K.VVNLNGELGDSWIVPLDgNLTKEDLDEEEDTHL.-	0.00000000000000000400000000000000.0	471
IPI00326070	Tax_Id=10116 Gene_Symbol=Ctsl Cathepsin L1 precursor	213	233	K.YRAEYAVAgNDTGFVDIPQQEK.A	0.000000004000000000000.0	221
IPI00326070	Tax_Id=10116 Gene_Symbol=Ctsl Cathepsin L1 precursor	215	233	R.AEYAVAgNDTGFVDIPQQEK.A	0.0000004000000000000.0	221
IPI00326140	Tax_Id=10116 Gene_Symbol=Pzp Alpha-1-macroglobulin precursor	375	391	K.GQPIPNKgNLTVQVNSVR.S	0.00000004000000000.0	382
IPI00326140	Tax_Id=10116 Gene_Symbol=Pzp Alpha-1-macroglobulin precursor	375	391	K.GQPIPNKgNLTVQVNSVR.S	0.00000404000000000.0	382
IPI00326140	Tax_Id=10116 Gene_Symbol=Pzp Alpha-1-macroglobulin precursor	562	587	K.CFANTVgNLSFPSAQSLPASDTHLTVK.A	0.00000040000000000000000000.0	568
IPI00326140	Tax_Id=10116 Gene_Symbol=Pzp Alpha-1-macroglobulin precursor	878	900	K.SLGEVgNFTATAEALQSPELCGNK.V	0.00000400000000000000000.0	883
IPI00326242	Tax_Id=10116 Gene_Symbol=Clcn5 Chloride channel protein 5	400	411	K.LCDYENHFgNTSK.G	0.000000004000.0	408
IPI00326260	Tax_Id=10116 Gene_Symbol=Sdfr1 Isoform 2 of Neuroplastin precursor	274	287	K.ENGVFEEISgNSSGR.F	0.00000000040000.0	283
IPI00326305	Tax_Id=10116 Gene_Symbol=Atp1a1 Sodium/potassium-transporting ATPase subunit alpha-1 precursor	205	227	R.IISANGCKVDgNSSLTGESEPQTR.S	0.00000000004000000000000.0	215
IPI00326305	Tax_Id=10116 Gene_Symbol=Atp1a1 Sodium/potassium-transporting ATPase subunit alpha-1 precursor	205	227	R.IISANGCKVDgNSSLTGESEPQTR.S	0.00004000004000000000000.0	215
IPI00326305	Tax_Id=10116 Gene_Symbol=Atp1a1 Sodium/potassium-transporting ATPase subunit alpha-1 precursor	213	227	K.VDgNSSLTGESEPQTR.S	0.004000000000000.0	215
IPI00326305	Tax_Id=10116 Gene_Symbol=Atp1a1 Sodium/potassium-transporting ATPase subunit alpha-1 precursor	386	413	R.MTVAHMWFDNQIHEADTTEgNQSGVSFDK.T	0.0000000000000000000400000000.0	405
IPI00326305	Tax_Id=10116 Gene_Symbol=Atp1a1 Sodium/potassium-transporting ATPase subunit alpha-1 precursor	488	502	K.YQLSIHKNPgNASEPK.H	0.000000000400000.0	497
IPI00326305	Tax_Id=10116 Gene_Symbol=Atp1a1 Sodium/potassium-transporting ATPase subunit alpha-1 precursor	708	726	R.QGAIVAVTGDGVgNDSPALK.K	0.0000000000004000000.0	720
IPI00326305	Tax_Id=10116 Gene_Symbol=Atp1a1 Sodium/potassium-transporting ATPase subunit alpha-1 precursor	708	727	R.QGAIVAVTGDGVgNDSPALKK.A	0.00000000000040000000.0	720
IPI00326462	Tax_Id=10116 Gene_Symbol=Enpp3 Ectonucleotide pyrophosphatase/phosphodiesterase family member 3	571	592	K.DSLgNCSCLALQTSGQEEQVNQR.L	0.0004000000000000000000.0	574
IPI00326462	Tax_Id=10116 Gene_Symbol=Enpp3 Ectonucleotide pyrophosphatase/phosphodiesterase family member 3	593	605	R.LgNLSGGEVSATEK.T	0.0400000000000.0	594
IPI00326462	Tax_Id=10116 Gene_Symbol=Enpp3 Ectonucleotide pyrophosphatase/phosphodiesterase family member 3	700	719	K.GNgNESQYDALITSNLVPMYK.E	0.00400000000000000000.0	702
IPI00326948	Tax_Id=10116 Gene_Symbol=Hsd17b4 Hsd17b4 protein	302	330	K.IDSEGISQgNHTGQVASADASGFAGVVGHK.L	0.00000000400000000000000000000.0	310
IPI00326948	Tax_Id=10116 Gene_Symbol=Hsd17b4 Hsd17b4 protein	685	696	K.gNGSGEVYQGPAK.G	0.400000000000.0	685
IPI00326990	Tax_Id=10116 Gene_Symbol=Slc15a2 Oligopeptide transporter, kidney isoform	537	552	K.DLgNISLDTDAPLSVGK.D	0.0040000000000000.0	539
IPI00326990	Tax_Id=10116 Gene_Symbol=Slc15a2 Oligopeptide transporter, kidney isoform	537	560	K.DLgNISLDTDAPLSVGKDYGVSAYR.T	0.004000000000000000000000.0	539
IPI00327143	Tax_Id=10116 Gene_Symbol=Alpl Alkaline phosphatase, tissue-nonspecific isozyme precursor	137	152	R.TRCgNTTQGNEVTSILR.W	0.0004000000000000.0	140
IPI00327143	Tax_Id=10116 Gene_Symbol=Alpl Alkaline phosphatase, tissue-nonspecific isozyme precursor	139	152	R.CgNTTQGNEVTSILR.W	0.04000000000000.0	140
IPI00327143	Tax_Id=10116 Gene_Symbol=Alpl Alkaline phosphatase, tissue-nonspecific isozyme precursor	230	241	K.gNRTDVEYELDEK.A	0.400000000000.0	230
IPI00327182	Tax_Id=10116 Gene_Symbol=Kng1 T-kininogen 1 precursor	196	207	K.IIYSIVQTgNCSK.E	0.000000004000.0	204
IPI00327182	Tax_Id=10116 Gene_Symbol=Kng1 T-kininogen 1 precursor	80	113	K.EGgNCSVQSGLTWQDCDFKDAEEAATGECTTTLGK.K	0.0040000000000000000000000000000000.0	82
IPI00327202	Tax_Id=10116 Gene_Symbol=Aqp1 Aquaporin-1	42	51	R.gNQTLVQDNVK.V	0.4000000000.0	42
IPI00327202	Tax_Id=10116 Gene_Symbol=Aqp1 Aquaporin-1	42	51	R.gNQTLVQDNVK.V	0.4000000400.0	42
IPI00327398	Tax_Id=10116 Gene_Symbol=Enpep Isoform 1 of Glutamyl aminopeptidase	233	243	K.ATYgNISLIHPK.E	0.00040000000.0	236
IPI00327398	Tax_Id=10116 Gene_Symbol=Enpep Isoform 1 of Glutamyl aminopeptidase	309	319	K.QTAEYAAgNITK.A	0.00000004000.0	316
IPI00327398	Tax_Id=10116 Gene_Symbol=Enpep Isoform 1 of Glutamyl aminopeptidase	577	590	K.WTENGNSgNITVYYR.S	0.00040004000000.0	584
IPI00327398	Tax_Id=10116 Gene_Symbol=Enpep Isoform 1 of Glutamyl aminopeptidase	594	609	R.EGITLNAgNLSGDGFLK.I	0.0000000400000000.0	601
IPI00327398	Tax_Id=10116 Gene_Symbol=Enpep Isoform 1 of Glutamyl aminopeptidase	620	646	R.VNYEAETWDWIAETLSSNHMgNFSSADR.S	0.000000000000000000004000000.0	640
IPI00327398	Tax_Id=10116 Gene_Symbol=Enpep Isoform 1 of Glutamyl aminopeptidase	746	764	K.MGAGEALGgNASQLFEAWLK.G	0.0000000040000000000.0	754
IPI00327398	Tax_Id=10116 Gene_Symbol=Enpep Isoform 1 of Glutamyl aminopeptidase	765	774	K.GgNESIPVNLR.L	0.0400000000.0	766
IPI00327398	Tax_Id=10116 Gene_Symbol=Enpep Isoform 1 of Glutamyl aminopeptidase	780	800	R.YGMQNSGNEAAWgNYTLEQYQK.T	0.000000000000400000000.0	792
IPI00327469	Tax_Id=10116 Gene_Symbol=Ahsg Alpha-2-HS-glycoprotein precursor	155	165	R.FgNDTNVVHTVK.T	0.04000000000.0	156
IPI00327469	Tax_Id=10116 Gene_Symbol=Ahsg Alpha-2-HS-glycoprotein precursor	166	181	K.TALAAFNAQNgNGTYFK.L	0.0000000000400000.0	176
IPI00327469	Tax_Id=10116 Gene_Symbol=Ahsg Alpha-2-HS-glycoprotein precursor	166	181	K.TALAAFNAQNgNGTYFK.L	0.0000000004400000.0	176
IPI00327469	Tax_Id=10116 Gene_Symbol=Ahsg Alpha-2-HS-glycoprotein precursor	166	181	K.TALAAFNAQNgNGTYFK.L	0.0000004000400000.0	176
IPI00327469	Tax_Id=10116 Gene_Symbol=Ahsg Alpha-2-HS-glycoprotein precursor	72	103	R.RPFGEVYELEIDTLETTCHALDPTPLAgNCSVR.Q	0.00000000000000000000000000040000.0	99
IPI00327697	Tax_Id=10116 Gene_Symbol=Dpep1 Dipeptidase 1 precursor	108	130	R.MCQLYPETFECVTgNSSDILQAFR.R	0.00000000000004000000000.0	121
IPI00327697	Tax_Id=10116 Gene_Symbol=Dpep1 Dipeptidase 1 precursor	331	339	R.RgNWTETEVR.G	0.040000000.0	332
IPI00327697	Tax_Id=10116 Gene_Symbol=Dpep1 Dipeptidase 1 precursor	53	70	R.KSEAgNLSALAETHTNIPK.L	0.000040000000000000.0	57
IPI00332022	Tax_Id=10116 Gene_Symbol=Igf2r Mannose 6-phosphate/insulin-like growth factor II receptor	571	591	K.ITTgNITFVCKPGDLESAPVLR.A	0.000400000000000000000.0	574
IPI00339118	Tax_Id=10116 Gene_Symbol=Enpp1 Isoform 2 of Ectonucleotide pyrophosphatase/phosphodiesterase family member 1	321	331	K.VYgNGSVPFEER.I	0.00400000000.0	323
IPI00339124	Tax_Id=10116 Gene_Symbol=Atp1b1 Sodium/potassium-transporting ATPase subunit beta-1	151	170	R.FKLDWLGgNCSGLNDESYGYK.E	0.00000004000000000000.0	158
IPI00339124	Tax_Id=10116 Gene_Symbol=Atp1b1 Sodium/potassium-transporting ATPase subunit beta-1	153	170	K.LDWLGgNCSGLNDESYGYK.E	0.000004000000000000.0	158
IPI00339124	Tax_Id=10116 Gene_Symbol=Atp1b1 Sodium/potassium-transporting ATPase subunit beta-1	153	170	K.LDWLGgNCSGLNDESYGYK.E	0.000004000040000000.0	158
IPI00339124	Tax_Id=10116 Gene_Symbol=Atp1b1 Sodium/potassium-transporting ATPase subunit beta-1	257	276	K.YLQPLLAVQFTgNLTLDTEIR.I	0.00000000000400000000.0	268
IPI00357926	Tax_Id=10116 Gene_Symbol=Egfl5_predicted EGF-like-domain, multiple 5	257	272	R.GAVSILCgNSSGNCQCK.L	0.0000000400000000.0	264
IPI00358059	Tax_Id=10116 Gene_Symbol=Dnpep Aspartyl aminopeptidase	409	424	R.gNDSPCGTTIGPILASR.L	0.4000000000000000.0	409
IPI00359123	Tax_Id=10116 Gene_Symbol=RGD1310427_predicted hypothetical protein LOC362643	912	921	R.FINYgNQTVSR.M	0.0000400000.0	916
IPI00359847	Tax_Id=10116 Gene_Symbol=Galns N-acetylgalactosamine-6-sulfatase precursor	201	219	K.TGEAgNLTQLYLQEALDFIR.T	0.0000400000000000000.0	205
IPI00360056	Tax_Id=10116 Gene_Symbol=Galm Aldose 1-epimerase	301	338	K.HSGFCLETQNWPDAVNQPQFPPILLRPGEEYgNHTTWFK.F	0.00000000040000000000000000000004000000.0	332
IPI00360957	Tax_Id=10116 Gene_Symbol=Slc10a5 Sodium/bile acid cotransporter 5 precursor	63	76	K.LEDPTVLQVVgNVTK.T	0.00000000004000.0	73
IPI00361301	Tax_Id=10116 Gene_Symbol=Lama2_predicted similar to Laminin alpha-2 chain precursor	1058	1083	K.VCgNCSTVGSLSSQCNINTGQCSCHPK.F	0.00400000000000000000000000.0	1060
IPI00361557	Tax_Id=10116 Gene_Symbol=Cnnm2 94 kDa protein	105	117	R.VYGQNINgNETWSR.I	0.0000000400000.0	112
IPI00362014	Tax_Id=10116 Gene_Symbol=Tln1 Tln1 protein	221	234	R.DDILgNGSHPVSFDK.A	0.00004000000000.0	225
IPI00362963	Tax_Id=10116 Gene_Symbol=RGD1310224 Similar to RIKEN cDNA 1810022C23	88	113	K.gNASTDNSVITVFTGVGDYYSSGNDLR.N	0.40000000000000000000000000.0	88
IPI00363534	Tax_Id=10116 Gene_Symbol=Lama1 laminin, alpha 1	1343	1352	R.IAgNISMEVGR.K	0.0040000000.0	1345
IPI00363534	Tax_Id=10116 Gene_Symbol=Lama1 laminin, alpha 1	1805	1816	K.LHVQEEQgNLTSK.L	0.000000040000.0	1812
IPI00363534	Tax_Id=10116 Gene_Symbol=Lama1 laminin, alpha 1	1997	2006	R.QAgNDSLTVLR.E	0.0040000000.0	1999
IPI00363534	Tax_Id=10116 Gene_Symbol=Lama1 laminin, alpha 1	2021	2032	K.ELAVAAgNETAAR.T	0.000000400000.0	2027
IPI00363534	Tax_Id=10116 Gene_Symbol=Lama1 laminin, alpha 1	2044	2053	R.VFgNTSEDLSR.V	0.0040000000.0	2046
IPI00363534	Tax_Id=10116 Gene_Symbol=Lama1 laminin, alpha 1	2044	2062	R.VFNTSEDLSRVgNATVQETK.D	0.0000000000040000000.0	2055
IPI00363534	Tax_Id=10116 Gene_Symbol=Lama1 laminin, alpha 1	2044	2062	R.VFgNTSEDLSRVgNATVQETK.D	0.0040000000040000000.0	20462055
IPI00363534	Tax_Id=10116 Gene_Symbol=Lama1 laminin, alpha 1	2624	2639	R.TIgNISNLYIGGLPEGK.G	0.0040000000000000.0	2626
IPI00363534	Tax_Id=10116 Gene_Symbol=Lama1 laminin, alpha 1	661	680	R.EIDRDQLMTVLAgNVTHLLIR.A	0.00000000000040000000.0	673
IPI00363651	Tax_Id=10116 Gene_Symbol=Pxn 64 kDa protein	90	106	K.gNSSASNPQDSVGSLCSR.A	0.40000000000000000.0	90
IPI00363849	Tax_Id=10116 Gene_Symbol=Lamc1 similar to Laminin gamma-1 chain precursor	1201	1215	K.TAgNETSAEAYNLLLR.T	0.004000000000000.0	1203
IPI00363849	Tax_Id=10116 Gene_Symbol=Lamc1 similar to Laminin gamma-1 chain precursor	1216	1232	R.TLAGEgNQTALEIEELNR.K	0.00000400000000000.0	1221
IPI00363849	Tax_Id=10116 Gene_Symbol=Lamc1 similar to Laminin gamma-1 chain precursor	645	653	K.LLNgNLTSIK.I	0.000400000.0	648
IPI00364124	Tax_Id=10116 Gene_Symbol=Lrpap1 Alpha-2-macroglobulin receptor-associated protein precursor	260	275	R.VIDLWDLAQSAgNFTEK.E	0.0000000000040000.0	271
IPI00364124	Tax_Id=10116 Gene_Symbol=Lrpap1 Alpha-2-macroglobulin receptor-associated protein precursor	260	281	R.VIDLWDLAQSAgNFTEKELESFR.E	0.0000000000040000000000.0	271
IPI00364439	Tax_Id=10116 Gene_Symbol=RGD1559682_predicted similar to Peptidyl-prolyl cis-trans isomerase A	2	19	M.VNLTMFFgNITADGEPLGR.V	0.000010040000000000.0	9
IPI00364439	Tax_Id=10116 Gene_Symbol=RGD1559682_predicted similar to Peptidyl-prolyl cis-trans isomerase A	2	19	M.VgNLTMFFNITADGEPLGR.V	0.040010000000000000.0	3
IPI00364439	Tax_Id=10116 Gene_Symbol=RGD1559682_predicted similar to Peptidyl-prolyl cis-trans isomerase A	92	118	K.HTGPGILSMANAGPNTgNGSQFFICTAK.T	0.000000000000000040000000000.0	108
IPI00364439	Tax_Id=10116 Gene_Symbol=RGD1559682_predicted similar to Peptidyl-prolyl cis-trans isomerase A	92	118	K.HTGPGILSMANAGPNTgNGSQFFICTAK.T	0.000000000000004040000000000.0	108
IPI00364439	Tax_Id=10116 Gene_Symbol=RGD1559682_predicted similar to Peptidyl-prolyl cis-trans isomerase A	92	118	K.HTGPGILSMANAGPNTgNGSQFFICTAK.T	0.000000001000000040000000000.0	108
IPI00364707	Tax_Id=10116 Gene_Symbol=Tmed9 Transmembrane emp24 protein transport domain containing 9	108	128	R.FTFTSHTPGEHQICLHSgNSTK.F	0.000000000000000004000.0	125
IPI00364777	Tax_Id=10116 Gene_Symbol=Letm1 Leucine zipper-EF-hand-containing transmembrane protein 1, mitochondrial precursor	310	330	K.LFEDELTLDgNLTRPQLVALCK.L	0.000000000400000000000.0	319
IPI00364925	Tax_Id=10116 Gene_Symbol=Dhtkd1 Probable 2-oxoglutarate dehydrogenase E1 component DHKTD1, mitochondrial precursor	565	590	K.gNGTNLDWATAETLALGSLLAQGFNVR.L	0.40000000000000000000000000.0	565
IPI00365423	Tax_Id=10116 Gene_Symbol=Ppp2r1a Protein phosphatase 2 (Formerly 2A), regulatory subunit A (PR 65), alpha isoform	308	318	K.EFCEgNLSADCR.E	0.00004000000.0	312
IPI00365423	Tax_Id=10116 Gene_Symbol=Ppp2r1a Protein phosphatase 2 (Formerly 2A), regulatory subunit A (PR 65), alpha isoform	547	566	K.IGPILDgNSTLQSEVKPILEK.L	0.00000040000000000000.0	553
IPI00365542	Tax_Id=10116 Gene_Symbol=Lamb1_predicted laminin, beta 1	1326	1345	R.SgNSTAGELDALQAEAGSLDK.T	0.04000000000000000000.0	1327
IPI00365542	Tax_Id=10116 Gene_Symbol=Lamb1_predicted laminin, beta 1	1326	1358	R.SgNSTAGELDALQAEAGSLDKTVNELAEQLEFIK.N	0.040000000000000000000000000000000.0	1327
IPI00365542	Tax_Id=10116 Gene_Symbol=Lamb1_predicted laminin, beta 1	1383	1401	R.VNASTTDPgNSTVEQSALTR.D	0.0000000040000000000.0	1391
IPI00365542	Tax_Id=10116 Gene_Symbol=Lamb1_predicted laminin, beta 1	1383	1401	R.VgNASTTDPNSTVEQSALTR.D	0.0400000000000000000.0	1384
IPI00365542	Tax_Id=10116 Gene_Symbol=Lamb1_predicted laminin, beta 1	1383	1401	R.VgNASTTDPgNSTVEQSALTR.D	0.0400000040000000000.0	13841391
IPI00365542	Tax_Id=10116 Gene_Symbol=Lamb1_predicted laminin, beta 1	1661	1693	K.QADEDIQGTQNLLTSIESETAASEETLTgNASQR.I	0.000000000000000000000000000040000.0	1689
IPI00365545	Tax_Id=10116 Gene_Symbol=Dld Dihydrolipoyl dehydrogenase, mitochondrial precursor	73	89	K.gNETLGGTCLNVGCIPSK.A	0.40000000000000000.0	73
IPI00365705	Tax_Id=10116 Gene_Symbol=Atp4a similar to Potassium-transporting ATPase alpha chain 1	223	237	K.VDgNSSLTGESEPQTR.S	0.004000000000000.0	225
IPI00365922	Tax_Id=10116 Gene_Symbol=LOC362795 LOC362795 protein	307	324	R.VFTAQTQPHEEQLgNGTFR.V	0.000000000000040000.0	320
IPI00365935	Tax_Id=10116 Gene_Symbol=Ptges3_predicted Prostaglandin E synthase 3	49	65	K.HLNEIDLFHCIDPgNDSK.H	0.00000000000004000.0	62
IPI00365985	Tax_Id=10116 Gene_Symbol=Tra1_predicted 93 kDa protein	215	237	K.HNgNDTQHIWESDSNEFSVIADPR.G	0.00400000000000000000000.0	217
IPI00365985	Tax_Id=10116 Gene_Symbol=Tra1_predicted 93 kDa protein	44	67	R.TDDEVVQREEEAIQLDGLgNASQIR.E	0.000000000000000000400000.0	62
IPI00366038	Tax_Id=10116 Gene_Symbol=Atxn2l_predicted similar to ataxin 2-like	139	148	K.gNGTTYEGIFK.T	0.4000000000.0	139
IPI00366226	Tax_Id=10116 Gene_Symbol=Gns Glucosamine (N-acetyl)-6-sulfatase	173	183	K.YYgNYTLSINGK.A	0.00400000400.0	175
IPI00366226	Tax_Id=10116 Gene_Symbol=Gns Glucosamine (N-acetyl)-6-sulfatase	359	393	K.MLVSNIDLGPTILDLAGYDLgNKTQMDGTSLLPILK.G	0.00000000000000000000400000000000000.0	379
IPI00366496	Tax_Id=10116 Gene_Symbol=Slc44a2_predicted similar to CTL2 gene	407	419	K.TCNPETFPLgNESR.Q	0.0000000004000.0	416
IPI00366665	Tax_Id=10116 Gene_Symbol=Car12 Membrane-bound carbonic anhydrase 12	86	97	K.LLgNLTNDGHSVR.L	0.004000000000.0	88
IPI00366665	Tax_Id=10116 Gene_Symbol=Car12 Membrane-bound carbonic anhydrase 12	86	97	K.LLgNLTNDGHSVR.L	0.004004000000.0	88
IPI00367078	Tax_Id=10116 Gene_Symbol=Ddx18 DEAD (Asp-Glu-Ala-Asp) box polypeptide 18	254	265	R.gNGTGVLILSPTR.E	0.400000000000.0	254
IPI00368347	Tax_Id=10116 Gene_Symbol=Ube1x Ubiquitin-activating enzyme E1, Chr X	44	57	K.gNGSEADIDESLYSR.Q	0.40000000000000.0	44
IPI00368704	Tax_Id=10116 Gene_Symbol=RGD1566313_predicted similar to Murinoglobulin 1 homolog	1000	1010	K.YLgNETQQLTEK.I	0.00400000000.0	1002
IPI00368704	Tax_Id=10116 Gene_Symbol=RGD1566313_predicted similar to Murinoglobulin 1 homolog	1135	1158	K.ALSCLESSWENIEQGGgNGSFVYTK.A	0.000000000000000040000000.0	1151
IPI00369140	Tax_Id=10116 Gene_Symbol=RGD1309019_predicted 38 kDa protein	162	180	K.DAFTgNVSSPDAGATLPNDK.A	0.0000400000000000000.0	166
IPI00369539	Tax_Id=10116 Gene_Symbol=Mfap4 Microfibrillar-associated protein 4	133	146	R.VDLEDFEgNNTAYAK.Y	0.00000004000000.0	140
IPI00369646	Tax_Id=10116 Gene_Symbol=Pfas_predicted phosphoribosylformylglycinamidine synthase	991	1007	R.VSVgNGTVVVEEPVGQLR.A	0.00040000000000000.0	994
IPI00370069	Tax_Id=10116 Gene_Symbol=RGD1307222_predicted similar to Putative eukaryotic translation initiation factor 3 subunit	1430	1440	R.gNGSSANIPPLK.F	0.40000000000.0	1430
IPI00370427	Tax_Id=10116 Gene_Symbol=Tinag Tubulointerstitial nephritis antigen	356	365	R.ISSgNETEIMR.E	0.0004000000.0	359
IPI00370427	Tax_Id=10116 Gene_Symbol=Tinag Tubulointerstitial nephritis antigen	356	365	R.ISSgNETEIMR.E	0.0004000010.0	359
IPI00370450	Tax_Id=10116 Gene_Symbol=Plxnb2 plexin B2	1087	1108	R.TEAGAFEYVADPTFEgNFTGGVK.K	0.0000000000000004000000.0	1102
IPI00370450	Tax_Id=10116 Gene_Symbol=Plxnb2 plexin B2	1087	1109	R.TEAGAFEYVADPTFEgNFTGGVKK.Q	0.00000000000000040000000.0	1102
IPI00370827	Tax_Id=10116 Gene_Symbol=Mcoln1_predicted mucolipin 1	152	168	R.GGGGPWAgNGSALALCQR.Y	0.00000004000000000.0	159
IPI00370827	Tax_Id=10116 Gene_Symbol=Mcoln1_predicted mucolipin 1	173	187	R.GHVDPAgNDTFDIDPR.V	0.000000400000000.0	179
IPI00371558	Tax_Id=10116 Gene_Symbol=Satb1 Special AT-rich sequence binding protein 1	33	42	R.LEQgNGSPLGR.G	0.0004000000.0	36
IPI00371761	Tax_Id=10116 Gene_Symbol=Enpp4_predicted ectonucleotide pyrophosphatase/phosphodiesterase 4	363	371	K.IgNVTEVYNK.L	0.040000000.0	364
IPI00371853	Tax_Id=10116 Gene_Symbol=Col6a1_predicted similar to Collagen alpha-1(VI) chain precursor	788	811	K.ENYAELLDDGFLKgNITAQICIDKK.C	0.000000000000040000000000.0	801
IPI00372372	Tax_Id=10116 Gene_Symbol=Serpinc1 Serine (Or cysteine) peptidase inhibitor, clade C (Antithrombin), member 1	184	202	K.SLTFgNESYQDVSEIVYGAK.L	0.0000400000000000000.0	188
IPI00372372	Tax_Id=10116 Gene_Symbol=Serpinc1 Serine (Or cysteine) peptidase inhibitor, clade C (Antithrombin), member 1	217	230	R.VTINNWVAgNKTEGR.I	0.00000000400000.0	225
IPI00372400	Tax_Id=10116 Gene_Symbol=Dap3 Death associated protein 3	228	238	R.gNATDAVGVVLK.E	0.40000000000.0	228
IPI00372786	Tax_Id=10116 Gene_Symbol=Nid2 similar to nidogen 2 isoform 2	700	712	R.SFSLISGSIgNQTR.S	0.0000000004000.0	709
IPI00372786	Tax_Id=10116 Gene_Symbol=Nid2 similar to nidogen 2 isoform 2	716	723	R.IDQgNITYK.A	0.00040000.0	719
IPI00372804	Tax_Id=10116 Gene_Symbol=Sccpdh Probable saccharopine dehydrogenase	112	136	K.ACIEgNGTSCIDICGEPQFLELMHVK.Y	0.0000400000000000000000000.0	116
IPI00372826	Tax_Id=10116 Gene_Symbol=Sfrs3_predicted Putative uncharacterized protein	12	28	K.VYVGNLGNNGgNKTELER.A	0.00000000004000000.0	22
IPI00372839	Tax_Id=10116 Gene_Symbol=Col6a2 similar to procollagen, type VI, alpha 2	139	154	R.GTFTDCALAgNMTQQIR.Q	0.0000000004000000.0	148
IPI00372839	Tax_Id=10116 Gene_Symbol=Col6a2 similar to procollagen, type VI, alpha 2	885	915	R.MALLQYGSQNQQQVAFPLTYgNVTTIHEALER.T	0.0000000000000000000040000000000.0	905
IPI00372952	Tax_Id=10116 Gene_Symbol=Icam2 Intercellular adhesion molecule 2	46	66	R.VgNCSTSCAAPEIGGLETPTNK.L	0.040000000000000000000.0	47
IPI00373144	Tax_Id=10116 Gene_Symbol=Snx5_predicted sorting nexin 5	389	402	R.NgNVSLLQSCIDLFK.N	0.04000000000000.0	390
IPI00373408	Tax_Id=10116 Gene_Symbol=Sort1 Sortilin precursor	154	165	K.DITNLIgNNTFIR.T	0.000000400000.0	160
IPI00373419	Tax_Id=10116 Gene_Symbol=Spnb2 Non-erythrocyte beta-spectrin	1953	1964	R.gNDSFTACIELGK.A	0.400000000000.0	1953
IPI00373752	Tax_Id=10116 Gene_Symbol=Flnb_predicted filamin, beta	2245	2265	K.gNGSCGVSYIAQEPGNYEVSIK.F	0.400000000000000000000.0	2245
IPI00382223	Tax_Id=10116 Gene_Symbol=RGD1308874 Ab2-305	141	154	R.VGPgNGTLFVVDAYK.G	0.00040000000000.0	144
IPI00382300	Tax_Id=10116 Gene_Symbol=Rab1 Ac2-048	193	209	K.gNATNVEQSFMTMAAEIK.K	0.40000000000000000.0	193
IPI00382320	Tax_Id=10116 Gene_Symbol=RGD1311563 93 kDa protein	611	629	R.TTLVDNNTWgNNSHIALVGK.A	0.0000000004000000000.0	620
IPI00387771	Tax_Id=10116 Gene_Symbol=Ppia Peptidyl-prolyl cis-trans isomerase A	92	118	K.HTGPGILSMANAGPNTgNGSQFFICTAK.T	0.000000000000000040000000000.0	108
IPI00387771	Tax_Id=10116 Gene_Symbol=Ppia Peptidyl-prolyl cis-trans isomerase A	92	118	K.HTGPGILSMANAGPNTgNGSQFFICTAK.T	0.000000000000004040000000000.0	108
IPI00387771	Tax_Id=10116 Gene_Symbol=Ppia Peptidyl-prolyl cis-trans isomerase A	92	118	K.HTGPGILSMANAGPNTgNGSQFFICTAK.T	0.000000001000000040000000000.0	108
IPI00388265	Tax_Id=10116 Gene_Symbol=Pgcp 48 kDa protein	318	344	R.LVLWTAEEQGGVGASQYYELHKAgNISK.Y	0.000000000000000000000004000.0	341
IPI00388265	Tax_Id=10116 Gene_Symbol=Pgcp 48 kDa protein	375	387	K.EVMSLLQPLgNITK.V	0.0000000004000.0	384
IPI00388265	Tax_Id=10116 Gene_Symbol=Pgcp 48 kDa protein	375	387	K.EVMSLLQPLgNITK.V	0.0010000004000.0	384
IPI00388323	Tax_Id=10116 Gene_Symbol=Hspg2 396 kDa protein	3062	3083	R.SLTQGSMIVGNLAPVgNGTSQGK.F	0.0000000000000004000000.0	3077
IPI00388323	Tax_Id=10116 Gene_Symbol=Hspg2 396 kDa protein	3062	3083	R.SLTQGSMIVGNLAPVgNGTSQGK.F	0.0000001000000004000000.0	3077
IPI00388323	Tax_Id=10116 Gene_Symbol=Hspg2 396 kDa protein	65	71	R.ALVgNFTR.S	0.0004000.0	68
IPI00388355	Tax_Id=10116 Gene_Symbol=Manba Isoform 1 of Beta-mannosidase precursor	98	118	K.LIFDGVDTVAEILFNgNVTIGK.T	0.000000000000000400000.0	113
IPI00389129	Tax_Id=10116 Gene_Symbol=Ank3 Ankyrin G197	1484	1496	K.gNATTDALTSVLTK.I	0.4000000000000.0	1484
IPI00391338	Tax_Id=10116 Gene_Symbol=RGD1562791_predicted similar to ICOS ligand precursor	239	260	R.VAAgNFSTPVISTSGSSDPGQER.T	0.0004000000000000000000.0	242
IPI00391769	Tax_Id=10116 Gene_Symbol=Cacna2d1 Voltage-gated calcium channel alpha2/delta-1 subunit	977	989	K.SFSGLLDCGgNCSR.I	0.0000000004000.0	986
IPI00392474	Tax_Id=10116 Gene_Symbol=Slc39a8 Zinc transporter ZIP8	36	50	R.VFGAgNQSLSAAQLGR.L	0.000040000000000.0	40
IPI00392753	Tax_Id=10116 Gene_Symbol=LOC259246;LOC298116;LOC259245;LOC298109 Alpha2u globulin	49	58	R.EKIEEgNGSMR.V	0.0000040000.0	54
IPI00392894	Tax_Id=10116 Gene_Symbol=Mgam_predicted 89 kDa protein	31	47	K.MESDLAgNTTAGFTAALK.N	0.00000040000000000.0	37
IPI00392894	Tax_Id=10116 Gene_Symbol=Mgam_predicted 89 kDa protein	338	361	K.LVIILDPAISgNNSLSSNPYGPYDR.G	0.000000000040000000000000.0	348
IPI00392894	Tax_Id=10116 Gene_Symbol=Mgam_predicted 89 kDa protein	367	380	K.VWVgNSSDGNALIGK.V	0.00040000000000.0	370
IPI00392894	Tax_Id=10116 Gene_Symbol=Mgam_predicted 89 kDa protein	584	601	K.DQDPASFGEDSLLLgNSSR.H	0.000000000000004000.0	598
IPI00393333	Tax_Id=10116 Gene_Symbol=Atic Bifunctional purine biosynthesis protein PURH	359	379	K.gNGSYCVLQMDQSYKPDENEVR.T	0.400000000000000000000.0	359
IPI00393407	Tax_Id=10116 Gene_Symbol=Slco4c1 Kidney-specific organic anion transporter	544	553	K.AYYgNCSCIER.K	0.0004000000.0	547
IPI00400573	Tax_Id=10116 Gene_Symbol=Tubb2c Tubulin beta-2C chain	337	350	K.gNSSYFVEWIPNNVK.T	0.40000000000000.0	337
IPI00400573	Tax_Id=10116 Gene_Symbol=Tubb2c Tubulin beta-2C chain	337	350	K.gNSSYFVEWIPNNVK.T	0.40000000004000.0	337
IPI00400573	Tax_Id=10116 Gene_Symbol=Tubb2c Tubulin beta-2C chain	363	379	K.MSATFIGgNSTAIQELFK.R	0.00000004000000000.0	370
IPI00400579	Tax_Id=10116 Gene_Symbol=Gaa Lysosomal alpha-glucosidase precursor	138	154	R.LEgNLSSTESGYTATLTR.T	0.00400000000000000.0	140
IPI00400579	Tax_Id=10116 Gene_Symbol=Gaa Lysosomal alpha-glucosidase precursor	465	479	R.GVFITgNETGQPLIGK.V	0.000004000000000.0	470
IPI00400723	Tax_Id=10116 Gene_Symbol=Sil1 Nucleotide exchange factor SIL1 precursor	58	92	R.REEELDAEVLEVLgNPTQEWQALQPGQAVPAGSHVR.M	0.00000000000004000000000000000000000.0	71
IPI00400747	Tax_Id=10116 Gene_Symbol=Man2b1 Mannosidase 2, alpha B1	495	511	R.EIgNISICPASQTSEHFR.V	0.00400000000000000.0	497
IPI00400747	Tax_Id=10116 Gene_Symbol=Man2b1 Mannosidase 2, alpha B1	757	781	R.DDFRPTWTLgNQTEPVAGNYYPVNTR.I	0.0000000004000000000000000.0	766
IPI00421539	Tax_Id=10116 Gene_Symbol=Aco2 Aconitate hydratase, mitochondrial precursor	608	628	R.GHLDgNISNNLLIGAINIENGK.A	0.000040000000000000000.0	612
IPI00421601	Tax_Id=10116 Gene_Symbol=Asah1 N-acylsphingosine amidohydrolase 1	254	266	R.SVLEgNSTSYEEAK.N	0.0000400000000.0	258
IPI00421874	Tax_Id=10116 Gene_Symbol=Vdac1 Voltage-dependent anion-selective channel protein 1	237	256	K.VNgNSSLIGLGYTQTLKPGIK.L	0.00400000000000000000.0	239
IPI00421874	Tax_Id=10116 Gene_Symbol=Vdac1 Voltage-dependent anion-selective channel protein 1	33	61	K.TKSENGLEFTSSGSANTETTKVgNGSLETK.Y	0.00000000000000000000004000000.0	55
IPI00421874	Tax_Id=10116 Gene_Symbol=Vdac1 Voltage-dependent anion-selective channel protein 1	33	61	K.TKSENGLEFTSSGSANTETTKVgNGSLETK.Y	0.00000000000000040000004000000.0	55
IPI00421874	Tax_Id=10116 Gene_Symbol=Vdac1 Voltage-dependent anion-selective channel protein 1	33	61	K.TKSENGLEFTSSGSANTETTKVgNGSLETK.Y	0.00004000000000000000004000000.0	55
IPI00421874	Tax_Id=10116 Gene_Symbol=Vdac1 Voltage-dependent anion-selective channel protein 1	35	61	K.SENGLEFTSSGSANTETTKVgNGSLETK.Y	0.000000000000000000004000000.0	55
IPI00421874	Tax_Id=10116 Gene_Symbol=Vdac1 Voltage-dependent anion-selective channel protein 1	35	61	K.SENGLEFTSSGSANTETTKVgNGSLETK.Y	0.000000000000040000004000000.0	55
IPI00464518	Tax_Id=10116 Gene_Symbol=Hexb Beta-hexosaminidase beta chain precursor	298	317	K.VGPVDPSLgNTTYVFFDTFFK.E	0.00000000400000000000.0	306
IPI00464765	Tax_Id=10116 Gene_Symbol=Igsf4a Immunoglobulin superfamily, member 4A	100	111	R.FQLLgNFSSSELK.V	0.000040000000.0	104
IPI00464765	Tax_Id=10116 Gene_Symbol=Igsf4a Immunoglobulin superfamily, member 4A	112	124	K.VSLTgNVSISDEGR.Y	0.0000400000000.0	116
IPI00464785	Tax_Id=10116 Gene_Symbol=Ppgb Protective protein for beta-galactosidase	136	153	K.MYVTgNDTEVAENNYQALK.D	0.000040000000000000.0	140
IPI00464785	Tax_Id=10116 Gene_Symbol=Ppgb Protective protein for beta-galactosidase	136	153	K.MYVTgNDTEVAENNYQALK.D	0.000040000004000000.0	140
IPI00464785	Tax_Id=10116 Gene_Symbol=Ppgb Protective protein for beta-galactosidase	136	153	K.MYVTgNDTEVAENNYQALK.D	0.100040000000000000.0	140
IPI00464785	Tax_Id=10116 Gene_Symbol=Ppgb Protective protein for beta-galactosidase	136	153	K.MYVTgNDTEVAENNYQALK.D	0.100040000004000000.0	140
IPI00464785	Tax_Id=10116 Gene_Symbol=Ppgb Protective protein for beta-galactosidase	136	163	K.MYVTgNDTEVAENNYQALKDFYHLFPEYK.D	0.0000400000000000000000000000.0	140
IPI00464785	Tax_Id=10116 Gene_Symbol=Ppgb Protective protein for beta-galactosidase	322	342	R.LDPPCTgNTTAPSTYLNNPYVR.K	0.000000400000000000000.0	328
IPI00464785	Tax_Id=10116 Gene_Symbol=Ppgb Protective protein for beta-galactosidase	322	342	R.LDPPCTgNTTAPSTYLNNPYVR.K	0.000000400000000400000.0	328
IPI00464886	Tax_Id=10116 Gene_Symbol=LOC652956 p55 protein	54	68	R.TgNGSVDLGEEEEAAR.G	0.040000000000000.0	55
IPI00470238	Tax_Id=10116 Gene_Symbol=Cd47 Isoform 2 of Leukocyte surface antigen CD47 precursor	27	42	K.SVEFTSCgNDTVVIPCK.V	0.0000000400000000.0	34
IPI00470238	Tax_Id=10116 Gene_Symbol=Cd47 Isoform 2 of Leukocyte surface antigen CD47 precursor	63	77	K.SYIFIYDGNKgNSTTR.E	0.000000000040000.0	73
IPI00470238	Tax_Id=10116 Gene_Symbol=Cd47 Isoform 2 of Leukocyte surface antigen CD47 precursor	94	119	K.GIASLTMDTHEAVVGgNYTCEVTELSR.E	0.00000000000000040000000000.0	109
IPI00470260	Tax_Id=10116 Gene_Symbol=Gm2a GM2 ganglioside activator protein	148	175	K.EGTYSLPSSgNFTVPDLELPSWLSTGNYR.I	0.0000000004000000000000000000.0	157
IPI00471607	Tax_Id=10116 Gene_Symbol=Picalm Clathrin-assembly lymphoid leukemia protein	480	509	K.LAPNKLVSDDLDSSLANLVGNLGIGgNGTTK.N	0.000000000000000000000000040000.0	505
IPI00471607	Tax_Id=10116 Gene_Symbol=Picalm Clathrin-assembly lymphoid leukemia protein	485	509	K.LVSDDLDSSLANLVGNLGIGgNGTTK.N	0.0000000000000000000040000.0	505
IPI00471666	Tax_Id=10116 Gene_Symbol=MGC94145 Uncharacterized protein C1orf179 homolog	183	204	K.GPNVPISTEVgNATQFLALVQEK.Y	0.0000000000400000000000.0	193
IPI00471666	Tax_Id=10116 Gene_Symbol=MGC94145 Uncharacterized protein C1orf179 homolog	208	240	K.ATISPGFTTLYVHQLPgNSTYTQAMVETMEELVR.A	0.000000000000000040000000000000000.0	224
IPI00471800	Tax_Id=10116 Gene_Symbol=Cdh16 Cadherin 16	600	613	R.FSLVgNDSEGWLCIK.E	0.00004000000000.0	604
IPI00475639	Tax_Id=10116 Gene_Symbol=LOC498736 Tubulin beta-2A chain	337	350	K.gNSSYFVEWIPNNVK.T	0.40000000000000.0	337
IPI00475639	Tax_Id=10116 Gene_Symbol=LOC498736 Tubulin beta-2A chain	337	350	K.gNSSYFVEWIPNNVK.T	0.40000000004000.0	337
IPI00475639	Tax_Id=10116 Gene_Symbol=LOC498736 Tubulin beta-2A chain	363	379	K.MSATFIGgNSTAIQELFK.R	0.00000004000000000.0	370
IPI00475676	Tax_Id=10116 Gene_Symbol=Tas1r2 Delta-1-pyrroline-5-carboxylate dehydrogenase, mitochondrial precursor	250	291	R.EAGLPPNVIQFVPADGPTFGDTVTSSEHLCGIgNFTGSVPTFK.H	0.000000000000000000000000000000004000000000.0	282
IPI00475803	Tax_Id=10116 Gene_Symbol=Cyp2c23 56 kDa protein	189	205	R.FQYNgNKTFLNLMDLLNK.N	0.00004000000000000.0	193
IPI00476540	Tax_Id=10116 Gene_Symbol=- 19 kDa protein	39	85	R.TEGAIDDSLIGGgNASAEGPEGEGTKSTVVTGVDIVMNHHLQETSFTK.E	0.00000000000040000000000000000000000040000000000.0	51
IPI00480673	Tax_Id=10116 Gene_Symbol=Rab1b;MGC105830 similar to Ras-related protein Rab-1B	154	170	K.gNATNVEQAFMTMAAEIK.K	0.40000000000000000.0	154
IPI00480673	Tax_Id=10116 Gene_Symbol=Rab1b;MGC105830 similar to Ras-related protein Rab-1B	154	170	K.gNATNVEQAFMTMAAEIK.K	0.40000000010000000.0	154
IPI00515854	Tax_Id=10116 Gene_Symbol=Entpd2 Ectonucleoside triphosphate diphosphohydrolase 2	127	138	R.LLgNLTSPEATAR.V	0.004000000000.0	129
IPI00554194	Tax_Id=10116 Gene_Symbol=Calu calumenin isoform b	131	150	R.gNVTYGTYLDDPDPDDGFNYK.Q	0.40000000000000000000.0	131
IPI00555252	Tax_Id=10116 Gene_Symbol=LOC682005;Gapdh;LOC685186 Glyceraldehyde-3-phosphate dehydrogenase	144	160	K.IVSgNASCTTNCLAPLAK.V	0.00040000000000000.0	147
IPI00556921	Tax_Id=10116 Gene_Symbol=Cd36 Fatty acid transport protein	317	332	K.VISNgNCTSYGVLDIGK.C	0.0000400000000000.0	321
IPI00556921	Tax_Id=10116 Gene_Symbol=Cd36 Fatty acid transport protein	64	82	R.QFWIFDVQNPEEVAKgNSSK.I	0.0000000000000004000.0	79
IPI00557299	Tax_Id=10116 Gene_Symbol=LOC498940 Similar to Carboxylesterase 2	272	285	R.TVAgNLSGCEQVDSK.A	0.00040000000000.0	275
IPI00558079	Tax_Id=10116 Gene_Symbol=RGD1559704_predicted similar to glyceraldehyde-3-phosphate dehydrogenase	144	160	K.IVSgNASCTTLCLAPLAK.V	0.00040000000000000.0	147
IPI00558132	Tax_Id=10116 Gene_Symbol=Neu1 44 kDa protein	340	350	R.WSFSgNGTSWQK.E	0.00004000000.0	344
IPI00558748	Tax_Id=10116 Gene_Symbol=LOC688457 similar to Major urinary protein precursor	49	58	R.EKIEEgNGSMR.V	0.0000040000.0	54
IPI00561262	Tax_Id=10116 Gene_Symbol=- 69 kDa protein	58	72	K.NQVAMgNPTNTVFDAK.R	0.000014000000000.0	63
IPI00561262	Tax_Id=10116 Gene_Symbol=- 69 kDa protein	58	72	K.NQVAMgNPTNTVFDAK.R	0.400014000000000.0	63
IPI00564327	Tax_Id=10116 Gene_Symbol=Mug2 Murinoglobulin-2 precursor	285	303	K.LDNNGCSTQEVgNITEFQLK.E	0.0000000000040000000.0	296
IPI00564327	Tax_Id=10116 Gene_Symbol=Mug2 Murinoglobulin-2 precursor	285	303	K.LDNNGCSTQEVgNITEFQLK.E	0.0004000000040000000.0	296
IPI00564327	Tax_Id=10116 Gene_Symbol=Mug2 Murinoglobulin-2 precursor	381	399	K.AQEAGYTgNATTTDQHGLAK.F	0.0000000400000000000.0	388
IPI00564327	Tax_Id=10116 Gene_Symbol=Mug2 Murinoglobulin-2 precursor	970	982	K.YLgNETQQLTENIK.S	0.0040000000000.0	972
IPI00565128	Tax_Id=10116 Gene_Symbol=- 35 kDa protein	145	161	K.IVSgNASCTTNCLAPLAK.V	0.00040000000000000.0	148
IPI00565677	Tax_Id=10116 Gene_Symbol=Col6a3_predicted 289 kDa protein	1939	1960	R.ELINALQIgNNTAVGHALVLPAR.R	0.0000000040000000000000.0	1947
IPI00565677	Tax_Id=10116 Gene_Symbol=Col6a3_predicted 289 kDa protein	369	393	K.NAgNPSELEQIVPSPAFILAAESLPK.I	0.0040000000000000000000000.0	371
IPI00567272	Tax_Id=10116 Gene_Symbol=- 37 kDa protein	158	174	K.IVSgNASCTTNCLAPLAK.V	0.00040000000000000.0	161
IPI00568931	Tax_Id=10116 Gene_Symbol=- 36 kDa protein	143	159	K.IVSgNASCTTNCLAPLAK.V	0.00040000000000000.0	146
IPI00569815	Tax_Id=10116 Gene_Symbol=RGD1565238_predicted similar to glyceraldehyde-3-phosphate dehydrogenase	144	160	K.IVSgNASCTTNCLAPLAK.V	0.00040000000000000.0	147
IPI00763060	Tax_Id=10116 Gene_Symbol=LOC684327 similar to inter-alpha (globulin) inhibitor H5	655	671	K.TLFPNYFgNGSEIVIAGK.M	0.00000004000000000.0	662
IPI00763638	Tax_Id=10116 Gene_Symbol=Cd36;RGD1565355_predicted Cd36 protein	317	332	K.VISNgNCTSYGVLDIGK.C	0.0000400000000000.0	321
IPI00763638	Tax_Id=10116 Gene_Symbol=Cd36;RGD1565355_predicted Cd36 protein	64	82	R.QFWIFDVQNPEEVAKgNSSK.I	0.0000000000000004000.0	79
IPI00763831	Tax_Id=10116 Gene_Symbol=LOC679565 similar to acyl-Coenzyme A binding domain containing 5	108	120	K.gNGSFQPTNEMMLR.F	0.4000000000000.0	108
IPI00764009	Tax_Id=10116 Gene_Symbol=LOC682869 similar to Golgi phosphoprotein 2 (Golgi membrane protein GP73) isoform 2	109	120	K.AVLVNgNITTGEK.L	0.000004000000.0	114
IPI00764984	Tax_Id=10116 Gene_Symbol=Itgav_predicted 106 kDa protein	16	31	K.AgNTTQPGIIEGGQVLK.C	0.0400000000000000.0	17
IPI00765293	Tax_Id=10116 Gene_Symbol=Aebp1_predicted AE binding protein 1	902	927	K.GVVTDEQGIPIAgNATISVSGINHGVK.T	0.00000000000040000000000000.0	914
IPI00765366	Tax_Id=10116 Gene_Symbol=Tubb4 tubulin, beta 4	337	350	K.gNSSYFVEWIPNNVK.T	0.40000000000000.0	337
IPI00765366	Tax_Id=10116 Gene_Symbol=Tubb4 tubulin, beta 4	337	350	K.gNSSYFVEWIPNNVK.T	0.40000000004000.0	337
IPI00765366	Tax_Id=10116 Gene_Symbol=Tubb4 tubulin, beta 4	363	379	K.MAATFIGgNSTAIQELFK.R	0.10000004000000000.0	370
IPI00765413	Tax_Id=10116 Gene_Symbol=- 58 kDa protein	151	172	R.VILILDPAISGgNETEPYPAFTR.G	0.0000000000040000000000.0	162
IPI00765413	Tax_Id=10116 Gene_Symbol=- 58 kDa protein	193	216	K.VWPDYPgNITVDPSLDWDSQVQQYR.A	0.000000400000000000000000.0	199
IPI00765413	Tax_Id=10116 Gene_Symbol=- 58 kDa protein	430	445	K.RQDPVSWgNETFEDISR.S	0.0000000400000000.0	437
IPI00765413	Tax_Id=10116 Gene_Symbol=- 58 kDa protein	90	108	R.YGYEgNDTEIANLYDEMVAK.R	0.0000400000000000000.0	94
IPI00767395	Tax_Id=10116 Gene_Symbol=Adam10 similar to ADAM 10 precursor	278	292	R.IgNTTSDEKDPTNPFR.F	0.040000000000000.0	279
IPI00767419	Tax_Id=10116 Gene_Symbol=Siae_predicted sialic acid acetylesterase	421	437	R.AVAYGEKgNLTFQGPLPK.K	0.00000004000000000.0	428
IPI00767980	Tax_Id=10116 Gene_Symbol=Ank1 ankyrin 1, erythroid	760	779	K.NGASPNEVSSgNGTTPLAIAK.R	0.40000000004000000000.0	770
IPI00776882	Tax_Id=10116 Gene_Symbol=Calu calumenin isoform a	131	150	K.gNATYSYVLDDPDPDDGFNYK.Q	0.40000000000000000000.0	131
IPI00776965	Tax_Id=10116 Gene_Symbol=LOC366380 similar to alpha-2u globulin PGCL2	49	58	R.EKIEEgNGSMR.V	0.0000040000.0	54
IPI00778528	Tax_Id=10116 Gene_Symbol=Hspg2 284 kDa protein	65	71	R.ALVgNFTR.S	0.0004000.0	68
IPI00779060	Tax_Id=10116 Gene_Symbol=Fbn1 115 kDa protein	331	348	K.AWGTPCELCPPVgNTSEYK.I	0.000000000000400000.0	343
IPI00785608	Tax_Id=10116 Gene_Symbol=Mup5 Alpha-2u globulin	49	58	R.EKIEEgNGSMR.V	0.0000040000.0	54
IPI00817070	Tax_Id=10116 Gene_Symbol=LOC685867;LOC684520 hypothetical protein LOC685867	95	110	R.VFDKEGgNGTVMGAEIR.H	0.0000004000000000.0	101
IPI00884593	Tax_Id=10116 Gene_Symbol=LOC259246;LOC298116;LOC259245 Rat alpha-2u-globulin	49	58	R.EKIEEgNGSMR.V	0.0000040000.0	54

## Sheet: ERLIC01
Glycoproteins identified in ERLIC01
IPI	description	pep_start	pep_end	glycoPep	mod	glycoSite
IPI00187799	Tax_Id=10116 Gene_Symbol=LOC25087;Kng1 Isoform HMW of Kininogen-1 precursor	162	172	K.HAVEHFNgNNTK.H	0.00000004000.0	169
IPI00188338	Tax_Id=10116 Gene_Symbol=Itih1_predicted inter-alpha trypsin inhibitor, heavy chain 1	581	589	R.AgNLSSQILK.M	0.040000000.0	582
IPI00188541	Tax_Id=10116 Gene_Symbol=Itih4 inter-alpha-inhibitor H4 heavy chain	509	531	K.VSGQMHLQgNITFQTEASIAQQEK.E	0.00001000400000000000000.0	517
IPI00188541	Tax_Id=10116 Gene_Symbol=Itih4 inter-alpha-inhibitor H4 heavy chain	561	581	R.ISASGAELEALEAQVLgNLSLK.Y	0.000000000000000040000.0	577
IPI00188731	Tax_Id=10116 Gene_Symbol=Cd48 CD48 antigen precursor	95	103	R.IYgNVSKEDR.G	0.004000000.0	97
IPI00188885	Tax_Id=10116 Gene_Symbol=Agrn Isoform 1 of Agrin precursor	811	830	K.AGFAQCICPTLTCPEAgNSTK.V	0.00000000000000004000.0	827
IPI00188924	Tax_Id=10116 Gene_Symbol=Uqcrc2 Cytochrome b-c1 complex subunit 2, mitochondrial precursor	359	374	K.AVAQGgNLSSADVQAAK.N	0.0000040000000000.0	364
IPI00188956	Tax_Id=10116 Gene_Symbol=Thy1 Thy-1 membrane glycoprotein precursor	88	107	K.VLTLAgNFTTKDEGDYMCELR.V	0.00000400000000010000.0	93
IPI00188956	Tax_Id=10116 Gene_Symbol=Thy1 Thy-1 membrane glycoprotein precursor	88	97	K.VLTLAgNFTTK.D	0.0000040000.0	93
IPI00189714	Tax_Id=10116 Gene_Symbol=Col12a1 similar to Collagen alpha-1(XII) chain precursor	1776	1790	R.NLQVYgNATSNSLTVK.W	0.000004000000000.0	1781
IPI00189714	Tax_Id=10116 Gene_Symbol=Col12a1 similar to Collagen alpha-1(XII) chain precursor	2540	2549	K.MLEAYgNLTEK.N	0.1000040000.0	2545
IPI00189714	Tax_Id=10116 Gene_Symbol=Col12a1 similar to Collagen alpha-1(XII) chain precursor	2693	2707	K.EAGgNITTDGYEILGK.L	0.000400000000000.0	2696
IPI00190499	Tax_Id=10116 Gene_Symbol=Tpp1 Tripeptidyl-peptidase 1 precursor	209	214	R.YgNLTAR.D	0.040000.0	210
IPI00190499	Tax_Id=10116 Gene_Symbol=Tpp1 Tripeptidyl-peptidase 1 precursor	215	245	R.DVGSGTTgNNSQACAQFLEQYFHNSDLTEFMR.L	0.0000000440000000000000000000010.0	222
IPI00190499	Tax_Id=10116 Gene_Symbol=Tpp1 Tripeptidyl-peptidase 1 precursor	432	447	K.SSSHLPPSSYFgNASGR.A	0.0000000000040000.0	443
IPI00190555	Tax_Id=10116 Gene_Symbol=Folh1 Glutamate carboxypeptidase 2	466	481	R.VDCTPLMHSLVYgNLTK.E	0.0000001000004000.0	478
IPI00190555	Tax_Id=10116 Gene_Symbol=Folh1 Glutamate carboxypeptidase 2	609	625	K.HAETIYgNISMNHPQEMK.A	0.00000040010000010.0	615
IPI00190555	Tax_Id=10116 Gene_Symbol=Folh1 Glutamate carboxypeptidase 2	74	81	K.KFLYgNFTR.T	0.00004000.0	78
IPI00190555	Tax_Id=10116 Gene_Symbol=Folh1 Glutamate carboxypeptidase 2	75	81	K.FLYgNFTR.T	0.0004000.0	78
IPI00190577	Tax_Id=10116 Gene_Symbol=Lama5 similar to Laminin alpha-5 chain precursor	2209	2222	R.LHRLgNASIADLQSK.L	0.00004000000000.0	2213
IPI00190577	Tax_Id=10116 Gene_Symbol=Lama5 similar to Laminin alpha-5 chain precursor	2212	2222	R.LgNASIADLQSK.L	0.04000000000.0	2213
IPI00190577	Tax_Id=10116 Gene_Symbol=Lama5 similar to Laminin alpha-5 chain precursor	2225	2253	R.SPLGPHgNQTAEQLQTLEQQSISLQQDTER.L	0.00000040000000000000000000000.0	2231
IPI00190577	Tax_Id=10116 Gene_Symbol=Lama5 similar to Laminin alpha-5 chain precursor	2295	2317	R.ALNELASQGFPGgNATTPSGEQLR.W	0.00000000000040000000000.0	2307
IPI00190577	Tax_Id=10116 Gene_Symbol=Lama5 similar to Laminin alpha-5 chain precursor	2390	2400	R.EALNHAVgNTTR.E	0.00000004000.0	2397
IPI00190577	Tax_Id=10116 Gene_Symbol=Lama5 similar to Laminin alpha-5 chain precursor	2421	2431	K.QELSQDgNATLK.A	0.00000040000.0	2427
IPI00190577	Tax_Id=10116 Gene_Symbol=Lama5 similar to Laminin alpha-5 chain precursor	2499	2517	K.LNQLAIgNLSGIIQGINQDR.F	0.0000004000000000000.0	2505
IPI00190577	Tax_Id=10116 Gene_Symbol=Lama5 similar to Laminin alpha-5 chain precursor	2568	2586	R.QLLAgNSSALVETILGHQER.L	0.0000400000000000000.0	2572
IPI00190577	Tax_Id=10116 Gene_Symbol=Lama5 similar to Laminin alpha-5 chain precursor	3201	3218	R.VFADGAPHYVAFYSgNVTR.V	0.000000000000004000.0	3215
IPI00190577	Tax_Id=10116 Gene_Symbol=Lama5 similar to Laminin alpha-5 chain precursor	924	933	R.LgNVTSPDLFR.L	0.0400000000.0	925
IPI00190776	Tax_Id=10116 Gene_Symbol=Cspg2 Isoform V0 of Versican core protein precursor (Fragment)	328	340	R.FEgNQTCFPLPDSR.F	0.0040000000000.0	330
IPI00191090	Tax_Id=10116 Gene_Symbol=Bgn Biglycan precursor	268	281	R.MIEgNGSLSFLPTLR.E	0.00040000000000.0	271
IPI00191090	Tax_Id=10116 Gene_Symbol=Bgn Biglycan precursor	268	281	R.MIEgNGSLSFLPTLR.E	0.10040000000000.0	271
IPI00191437	Tax_Id=10116 Gene_Symbol=- 64 kDa protein	134	152	R.YGYEgNDTEIANLYDEMVAK.Q	0.0000400000000001000.0	138
IPI00191437	Tax_Id=10116 Gene_Symbol=- 64 kDa protein	195	216	R.VILILDPAISGgNETEPYPAFTR.G	0.0000000000040000000000.0	206
IPI00191437	Tax_Id=10116 Gene_Symbol=- 64 kDa protein	271	278	R.gNSTALWWK.N	0.40000000.0	271
IPI00191437	Tax_Id=10116 Gene_Symbol=- 64 kDa protein	474	489	K.RQDPVSWgNKTFEDISR.S	0.0000000400000000.0	481
IPI00191437	Tax_Id=10116 Gene_Symbol=- 64 kDa protein	475	489	R.QDPVSWgNKTFEDISR.S	0.000000400000000.0	481
IPI00191681	Tax_Id=10116 Gene_Symbol=Itgb1 Integrin beta-1 precursor	203	220	K.LRNPCTSEQgNCTSPFSYK.N	0.000000000400000000.0	212
IPI00191737	Tax_Id=10116 Gene_Symbol=Alb Serum albumin precursor	131	168	K.DDNPNLPPFQRPEAEAMCTSFQEgNPTSFLGHYLHEVAR.R	0.00000000000000000000000400000000000000.0	154
IPI00191738	Tax_Id=10116 Gene_Symbol=Gclm Glutamate--cysteine ligase regulatory subunit	95	107	K.LFIVGSgNSSSSTR.N	0.0000004000000.0	101
IPI00192159	Tax_Id=10116 Gene_Symbol=Ube2d3 Ubiquitin-conjugating enzyme E2 D3	76	93	R.IYHPNINSgNGSICLDILR.S	0.000000004000000000.0	84
IPI00192302	Tax_Id=10116 Gene_Symbol=Itih3 99 kDa protein	575	591	R.GDEKEgNITAEALELSLK.Y	0.00000400000000000.0	580
IPI00192310	Tax_Id=10116 Gene_Symbol=Bcam Lutheran antigen	314	323	K.GgNLTLEGVHR.S	0.0400000000.0	315
IPI00192495	Tax_Id=10116 Gene_Symbol=Ncstn Isoform 1 of Nicastrin precursor	577	596	K.VTgNLTQEQCQDPSKVPNESK.D	0.00400000000000000000.0	579
IPI00192504	Tax_Id=10116 Gene_Symbol=Mrc2 Macrophage mannose receptor 2 precursor	1156	1176	R.gNASLAHVPDPYTQAFLTQAAR.G	0.400000000000000000000.0	1156
IPI00192504	Tax_Id=10116 Gene_Symbol=Mrc2 Macrophage mannose receptor 2 precursor	360	373	K.KKPgNATAEPIQPDR.W	0.00040000000000.0	363
IPI00192504	Tax_Id=10116 Gene_Symbol=Mrc2 Macrophage mannose receptor 2 precursor	63	75	R.VIPVCgNASLPAQR.W	0.0000040000000.0	68
IPI00192796	Tax_Id=10116 Gene_Symbol=RGD1564625_predicted similar to Transmembrane 9 superfamily protein member 3 precursor	302	312	R.IVDVgNLTSEGK.V	0.00004000000.0	306
IPI00192818	Tax_Id=10116 Gene_Symbol=Unc84a 102 kDa protein	830	842	K.TLSPTGgNISSAPR.D	0.0000004000000.0	836
IPI00193425	Tax_Id=10116 Gene_Symbol=Bsg Isoform 2 of Basigin precursor	143	160	K.TSDTGDQTISgNGTEANSK.Y	0.000000000040000000.0	153
IPI00193425	Tax_Id=10116 Gene_Symbol=Bsg Isoform 2 of Basigin precursor	37	54	K.TQLTCFLgNSSGIDIVGHR.W	0.000000040000000000.0	44
IPI00193490	Tax_Id=10116 Gene_Symbol=Itgb5 89 kDa protein	703	709	K.SgNLTVLR.E	0.0400000.0	704
IPI00193765	Tax_Id=10116 Gene_Symbol=Ctsc Dipeptidyl-peptidase 1 precursor	272	308	R.ILTgNNSQTPILSPQEVVSCSPYAQGCDGGFPYLIAGK.Y	0.0004000000000000000000000000000000000.0	275
IPI00193765	Tax_Id=10116 Gene_Symbol=Ctsc Dipeptidyl-peptidase 1 precursor	50	63	R.SHIgNCSVMEPTEEK.V	0.00040001000000.0	53
IPI00193869	Tax_Id=10116 Gene_Symbol=Clptm1_predicted cleft lip and palate associated transmembrane protein 1	290	304	K.DYYPIgNESLASLPLR.V	0.000004000000000.0	295
IPI00193894	Tax_Id=10116 Gene_Symbol=Mgam_predicted 198 kDa protein	1290	1311	R.VILILDPAISGgNETEPYPAFTR.G	0.0000000000040000000000.0	1301
IPI00193894	Tax_Id=10116 Gene_Symbol=Mgam_predicted 198 kDa protein	1366	1373	R.gNSTALWWK.K	0.40000000.0	1366
IPI00193894	Tax_Id=10116 Gene_Symbol=Mgam_predicted 198 kDa protein	1569	1584	R.RQDPVSWgNKTFEDISR.S	0.0000000400000000.0	1576
IPI00193894	Tax_Id=10116 Gene_Symbol=Mgam_predicted 198 kDa protein	1570	1584	R.QDPVSWgNKTFEDISR.S	0.000000400000000.0	1576
IPI00193894	Tax_Id=10116 Gene_Symbol=Mgam_predicted 198 kDa protein	455	468	K.VWVgNSSDGNALIGK.V	0.00040000000000.0	458
IPI00193894	Tax_Id=10116 Gene_Symbol=Mgam_predicted 198 kDa protein	671	688	K.DQDPASFGEDSLLLgNSSR.H	0.000000000000004000.0	685
IPI00193894	Tax_Id=10116 Gene_Symbol=Mgam_predicted 198 kDa protein	942	959	R.IDCYPDEHGVSEAgNCTAR.G	0.000000000000040000.0	955
IPI00194958	Tax_Id=10116 Gene_Symbol=Picalm Isoform 2 of Phosphatidylinositol-binding clathrin assembly protein	447	474	K.STNVAVDSGGGLLKPTVASQgNQSLPVAK.L	0.0000000000000000000040000000.0	467
IPI00194958	Tax_Id=10116 Gene_Symbol=Picalm Isoform 2 of Phosphatidylinositol-binding clathrin assembly protein	480	504	K.LVSDDLDSSLANLVGNLGIGgNGTTK.N	0.0000000000000000000040000.0	500
IPI00194974	Tax_Id=10116 Gene_Symbol=Hnrpk Hnrpk protein	70	86	R.TDYgNASVSVPDSSGPER.I	0.00040000000000000.0	73
IPI00195148	Tax_Id=10116 Gene_Symbol=Es2 Liver carboxylesterase 1 precursor	300	316	K.LDgNTSMSTVIDGVVLPK.T	0.00400100000000000.0	302
IPI00195148	Tax_Id=10116 Gene_Symbol=Es2 Liver carboxylesterase 1 precursor	369	387	K.RFSPNLgNISESVIPAIIEK.Y	0.0000004000000000000.0	375
IPI00195148	Tax_Id=10116 Gene_Symbol=Es2 Liver carboxylesterase 1 precursor	370	387	R.FSPNLgNISESVIPAIIEK.Y	0.000004000000000000.0	375
IPI00195160	Tax_Id=10116 Gene_Symbol=Psap Sulfated glycoprotein 1 precursor	213	226	R.TgNSSFVQGLVDHVK.E	0.04000000000000.0	214
IPI00195160	Tax_Id=10116 Gene_Symbol=Psap Sulfated glycoprotein 1 precursor	213	231	R.TgNSSFVQGLVDHVKEDCDR.L	0.0400000000000000000.0	214
IPI00195160	Tax_Id=10116 Gene_Symbol=Psap Sulfated glycoprotein 1 precursor	213	241	R.TgNSSFVQGLVDHVKEDCDRLGPGVSDICK.N	0.04000000000000000000000000000.0	214
IPI00195160	Tax_Id=10116 Gene_Symbol=Psap Sulfated glycoprotein 1 precursor	445	459	K.LVIYLEHNLEKgNSTK.E	0.000000000004000.0	456
IPI00195160	Tax_Id=10116 Gene_Symbol=Psap Sulfated glycoprotein 1 precursor	445	468	K.LVIYLEHNLEKgNSTKEEILAALEK.G	0.000000000004000000000000.0	456
IPI00195160	Tax_Id=10116 Gene_Symbol=Psap Sulfated glycoprotein 1 precursor	456	468	K.gNSTKEEILAALEK.G	0.4000000000000.0	456
IPI00195160	Tax_Id=10116 Gene_Symbol=Psap Sulfated glycoprotein 1 precursor	68	92	K.TVVTEAGNLLKDgNATEEEILHYLEK.T	0.0000000000004000000000000.0	80
IPI00195160	Tax_Id=10116 Gene_Symbol=Psap Sulfated glycoprotein 1 precursor	79	92	K.DgNATEEEILHYLEK.T	0.04000000000000.0	80
IPI00195173	Tax_Id=10116 Gene_Symbol=Cd59 CD59 glycoprotein precursor	37	55	K.TgNSTCSPNLDACLVAVSGK.Q	0.0400000000000000000.0	38
IPI00195241	Tax_Id=10116 Gene_Symbol=Apoh Beta-2-glycoprotein 1 precursor	110	125	K.TSVGgNSSFYQDTVVFK.C	0.0000400000000000.0	114
IPI00195241	Tax_Id=10116 Gene_Symbol=Apoh Beta-2-glycoprotein 1 precursor	203	213	K.TGgNWSALPSCK.A	0.00400000000.0	205
IPI00195241	Tax_Id=10116 Gene_Symbol=Apoh Beta-2-glycoprotein 1 precursor	49	75	R.YTTFEYPNTIGFACNPGYYLgNGTSSSK.C	0.000000000000000000004000000.0	69
IPI00195241	Tax_Id=10116 Gene_Symbol=Apoh Beta-2-glycoprotein 1 precursor	49	75	R.YTTFEYPNTIGFACNPGYYLgNGTSSSK.C	0.000000040000000000004000000.0	69
IPI00195516	Tax_Id=10116 Gene_Symbol=Hpx Hemopexin precursor	180	192	R.SWPAVGgNCTAALR.W	0.0000004000000.0	186
IPI00195931	Tax_Id=10116 Gene_Symbol=Tspan8 D6.1A protein	116	126	R.ILgNETLYENAK.L	0.00400000000.0	118
IPI00196226	Tax_Id=10116 Gene_Symbol=RGD1303130 Uncharacterized protein C1orf85 homolog precursor	173	191	R.GHPVDDPTGAFAgNGSLTFK.V	0.0000000000004000000.0	185
IPI00196620	Tax_Id=10116 Gene_Symbol=Cubn Cubilin precursor	1498	1504	R.GFgNASWR.A	0.0040000.0	1500
IPI00196620	Tax_Id=10116 Gene_Symbol=Cubn Cubilin precursor	1800	1810	R.EGgNATGHLIGR.Y	0.00400000000.0	1802
IPI00196620	Tax_Id=10116 Gene_Symbol=Cubn Cubilin precursor	2073	2090	R.FTSDTSVAGTGFgNASFHK.S	0.000000000000400000.0	2085
IPI00196620	Tax_Id=10116 Gene_Symbol=Cubn Cubilin precursor	2393	2405	K.DFVEIWEgNHTSGR.V	0.0000000400000.0	2400
IPI00196620	Tax_Id=10116 Gene_Symbol=Cubn Cubilin precursor	2410	2429	R.YCGgNSTPSSVDTSSNVASVK.F	0.00040000000000000000.0	2413
IPI00196620	Tax_Id=10116 Gene_Symbol=Cubn Cubilin precursor	2530	2537	R.VgNVTNEFK.S	0.04000000.0	2531
IPI00196620	Tax_Id=10116 Gene_Symbol=Cubn Cubilin precursor	2923	2938	R.TFgNTSPGDIISPNFPK.Q	0.0040000000000000.0	2925
IPI00196620	Tax_Id=10116 Gene_Symbol=Cubn Cubilin precursor	3034	3049	R.AITCGGIYgNESSGILR.S	0.0000000040000000.0	3042
IPI00196620	Tax_Id=10116 Gene_Symbol=Cubn Cubilin precursor	3123	3133	K.STgNSSLTLLFK.T	0.00400000000.0	3125
IPI00196620	Tax_Id=10116 Gene_Symbol=Cubn Cubilin precursor	3398	3407	R.EYgNQTFGNLK.S	0.0040000000.0	3400
IPI00196620	Tax_Id=10116 Gene_Symbol=Cubn Cubilin precursor	777	788	R.KICGgNETLFPIR.S	0.000040000000.0	781
IPI00196620	Tax_Id=10116 Gene_Symbol=Cubn Cubilin precursor	778	788	K.ICGgNETLFPIR.S	0.00040000000.0	781
IPI00196620	Tax_Id=10116 Gene_Symbol=Cubn Cubilin precursor	94	113	R.KgNTTGLPQNILSQVHQLNSK.L	0.04000000000000000000.0	95
IPI00196620	Tax_Id=10116 Gene_Symbol=Cubn Cubilin precursor	94	113	R.KgNTTGLPQNILSQVHQLNSK.L	0.04000000000000000400.0	95
IPI00196620	Tax_Id=10116 Gene_Symbol=Cubn Cubilin precursor	94	113	R.KgNTTGLPQNILSQVHQLNSK.L	0.04000000400000000000.0	95
IPI00196620	Tax_Id=10116 Gene_Symbol=Cubn Cubilin precursor	95	113	K.gNTTGLPQNILSQVHQLNSK.L	0.4000000000000000000.0	95
IPI00197164	Tax_Id=10116 Gene_Symbol=Icam1 Intercellular adhesion molecule 1 precursor	307	331	R.IYgNFSAPILTLSQPEVSEGDQVTVK.C	0.0040000000000000000000000.0	309
IPI00197579	Tax_Id=10116 Gene_Symbol=Tubb5 Isoform 1 of Tubulin beta-5 chain	337	350	K.gNSSYFVEWIPNNVK.T	0.40000000000000.0	337
IPI00197684	Tax_Id=10116 Gene_Symbol=Xpnpep2 Membrane-bound aminopeptidase P	35	53	R.DCSTNPPRLPVTAVgNTTMR.L	0.0000000000000040000.0	49
IPI00197684	Tax_Id=10116 Gene_Symbol=Xpnpep2 Membrane-bound aminopeptidase P	35	53	R.DCSTNPPRLPVTAVgNTTMR.L	0.0000000000000040010.0	49
IPI00197684	Tax_Id=10116 Gene_Symbol=Xpnpep2 Membrane-bound aminopeptidase P	406	435	R.RNEgNFSSGPSFETISASGLNAALAHYSPTK.E	0.000400000000000000000000000000.0	409
IPI00197684	Tax_Id=10116 Gene_Symbol=Xpnpep2 Membrane-bound aminopeptidase P	406	435	R.RNEgNFSSGPSFETISASGLNAALAHYSPTK.E	0.000400000000000000040000000000.0	409
IPI00197684	Tax_Id=10116 Gene_Symbol=Xpnpep2 Membrane-bound aminopeptidase P	407	435	R.NEgNFSSGPSFETISASGLNAALAHYSPTK.E	0.00400000000000000000000000000.0	409
IPI00197684	Tax_Id=10116 Gene_Symbol=Xpnpep2 Membrane-bound aminopeptidase P	43	53	R.LPVTAVgNTTMR.L	0.00000040000.0	49
IPI00197684	Tax_Id=10116 Gene_Symbol=Xpnpep2 Membrane-bound aminopeptidase P	43	53	R.LPVTAVgNTTMR.L	0.00000040010.0	49
IPI00197684	Tax_Id=10116 Gene_Symbol=Xpnpep2 Membrane-bound aminopeptidase P	64	84	K.SgNLSAYIIPDTDAHMSEYIGK.H	0.040000000000000000000.0	65
IPI00197684	Tax_Id=10116 Gene_Symbol=Xpnpep2 Membrane-bound aminopeptidase P	64	84	K.SgNLSAYIIPDTDAHMSEYIGK.H	0.040000000000001000000.0	65
IPI00197770	Tax_Id=10116 Gene_Symbol=Aldh2 Aldehyde dehydrogenase, mitochondrial precursor	54	80	K.KTFPTVgNPSTGEVICQVAEGNKEDVDK.A	0.000000400000000000000000000.0	60
IPI00197864	Tax_Id=10116 Gene_Symbol=LOC314016 Melanoma-associated antigen MG50 (Fragment)	17	27	R.ILCDNSDgNITR.V	0.00000004000.0	24
IPI00198021	Tax_Id=10116 Gene_Symbol=Umod Uromodulin precursor	440	458	K.TSLQPMVSALgNISLGGTGK.F	0.0000010000400000000.0	450
IPI00198080	Tax_Id=10116 Gene_Symbol=Pcyox1 Prenylcysteine oxidase precursor	194	200	R.LLgNQTLR.E	0.0040000.0	196
IPI00198327	Tax_Id=10116 Gene_Symbol=Vdac2 Voltage-dependent anion-selective channel protein 2	187	209	R.TGDFQLHTNVNgNGTEFGGSIYQK.V	0.00000000000400000000000.0	198
IPI00198405	Tax_Id=10116 Gene_Symbol=Arsb Arylsulfatase B	260	277	R.IYAGMVSLLDEAVGgNVTK.A	0.000010000000004000.0	274
IPI00198641	Tax_Id=10116 Gene_Symbol=LOC246263 Acyl-coenzyme A synthetase ACSM2, mitochondrial precursor	462	472	R.TDDIIgNSSGYR.I	0.00000400000.0	467
IPI00198667	Tax_Id=10116 Gene_Symbol=Clu Clusterin precursor	324	335	R.QELgNDSLQVAER.L	0.000400000000.0	327
IPI00198717	Tax_Id=10116 Gene_Symbol=Mdh1 Malate dehydrogenase, cytoplasmic	180	199	K.NVIIWGgNHSSTQYPDVNHAK.V	0.00000040000000000000.0	186
IPI00199305	Tax_Id=10116 Gene_Symbol=Atp6v1b2 Vacuolar ATP synthase subunit B, brain isoform	345	381	R.gNGSITQIPILTMPNDDITHPIPDLTGYITEGQIYVDR.Q	0.4000000000000400000000000000000000000.0	345
IPI00199305	Tax_Id=10116 Gene_Symbol=Atp6v1b2 Vacuolar ATP synthase subunit B, brain isoform	345	381	R.gNGSITQIPILTMPNDDITHPIPDLTGYITEGQIYVDR.Q	0.4000000000010000000000000000000000000.0	345
IPI00199305	Tax_Id=10116 Gene_Symbol=Atp6v1b2 Vacuolar ATP synthase subunit B, brain isoform	345	381	R.gNGSITQIPILTMPNDDITHPIPDLTGYITEGQIYVDR.Q	0.4000000000010400000000000000000000000.0	345
IPI00199445	Tax_Id=10116 Gene_Symbol=Ank3 ankyrin 3, epithelial isoform 2	2431	2462	R.SFADENNVFHDPVDGWQgNETPSGSLESPAQAR.R	0.00000000000000000400000000000000.0	2448
IPI00199448	Tax_Id=10116 Gene_Symbol=Lgals3bp Mama	396	407	R.SLgNLTEDVYKPR.L	0.004000000000.0	398
IPI00199448	Tax_Id=10116 Gene_Symbol=Lgals3bp Mama	531	543	K.APIPGTQETgNSSK.T	0.0000000004000.0	540
IPI00199448	Tax_Id=10116 Gene_Symbol=Lgals3bp Mama	64	76	R.ALGYEgNATQALSR.A	0.0000040000000.0	69
IPI00199585	Tax_Id=10116 Gene_Symbol=Slc22a5 Organic cation/carnitine transporter 2	86	101	R.LATIAgNFSALGLEPGR.D	0.0000040000000000.0	91
IPI00199607	Tax_Id=10116 Gene_Symbol=Ceacam1_v4;Ceacam1_v1;Ceacam1;Ceacam1_v3 carcinoembryonic antigen-related cell adhesion molecule isoform 2	368	378	R.MTLSQDgNSTLR.I	0.10000040000.0	374
IPI00199695	Tax_Id=10116 Gene_Symbol=Serpinf2 Serine (Or cysteine) peptidase inhibitor, clade F, member 2	126	134	R.gNQTLENLQR.V	0.400000000.0	126
IPI00199778	Tax_Id=10116 Gene_Symbol=RGD1305457 IKIP1 protein	149	157	K.FQgNITDLWK.R	0.004000000.0	151
IPI00199861	Tax_Id=10116 Gene_Symbol=Dcn Decorin precursor	202	227	R.ISDTgNITAIPQGLPTSISELHLDGNK.I	0.00004000000000000000000000.0	206
IPI00199867	Tax_Id=10116 Gene_Symbol=Emilin1_predicted elastin microfibril interfacer 1	450	459	K.LEVLLAgNVSR.E	0.0000004000.0	456
IPI00199867	Tax_Id=10116 Gene_Symbol=Emilin1_predicted elastin microfibril interfacer 1	561	578	R.LgNLTAAQLSQLEGLLQAR.G	0.040000000000000000.0	562
IPI00199867	Tax_Id=10116 Gene_Symbol=Emilin1_predicted elastin microfibril interfacer 1	765	779	R.ESgNSTSLTQAALLEK.L	0.004000000000000.0	767
IPI00199867	Tax_Id=10116 Gene_Symbol=Emilin1_predicted elastin microfibril interfacer 1	791	804	R.LGALgNSSLLLLEDR.L	0.00004000000000.0	795
IPI00200067	Tax_Id=10116 Gene_Symbol=F11r Junctional adhesion molecule A precursor	182	193	R.AFIgNSSYTIDPK.S	0.000400000000.0	185
IPI00200195	Tax_Id=10116 Gene_Symbol=LOC246120 Putative phospholipase B-like 2 precursor	505	520	R.SDLNPAgNGSYPFQALR.Q	0.0000004000000000.0	511
IPI00200422	Tax_Id=10116 Gene_Symbol=LOC298111 Alpha2u globulin	49	58	R.EKIEEgNGSMR.V	0.0000040010.0	54
IPI00200422	Tax_Id=10116 Gene_Symbol=LOC298111 Alpha2u globulin	51	58	K.IEEgNGSMR.V	0.00040000.0	54
IPI00200591	Tax_Id=10116 Gene_Symbol=LOC299282 Serine protease inhibitor A3L precursor	101	121	K.FgNLTEITEEEIHQGFGHLLQR.L	0.040000000000000000000.0	102
IPI00200591	Tax_Id=10116 Gene_Symbol=LOC299282 Serine protease inhibitor A3L precursor	174	187	K.KLINDYVSgNQTQGK.I	0.00000000400000.0	182
IPI00200591	Tax_Id=10116 Gene_Symbol=LOC299282 Serine protease inhibitor A3L precursor	174	187	K.KLINDYVSgNQTQGK.I	0.00040000400000.0	182
IPI00200591	Tax_Id=10116 Gene_Symbol=LOC299282 Serine protease inhibitor A3L precursor	175	187	K.LINDYVSgNQTQGK.I	0.0000000400000.0	182
IPI00200591	Tax_Id=10116 Gene_Symbol=LOC299282 Serine protease inhibitor A3L precursor	175	187	K.LINDYVSgNQTQGK.I	0.0040000400000.0	182
IPI00200591	Tax_Id=10116 Gene_Symbol=LOC299282 Serine protease inhibitor A3L precursor	213	232	K.WKVPFNPgNDTFESEFYLDEK.R	0.00000004000000000000.0	220
IPI00200591	Tax_Id=10116 Gene_Symbol=LOC299282 Serine protease inhibitor A3L precursor	213	233	K.WKVPFNPgNDTFESEFYLDEKR.S	0.000000040000000000000.0	220
IPI00200591	Tax_Id=10116 Gene_Symbol=LOC299282 Serine protease inhibitor A3L precursor	215	232	K.VPFNPgNDTFESEFYLDEK.R	0.000004000000000000.0	220
IPI00200591	Tax_Id=10116 Gene_Symbol=LOC299282 Serine protease inhibitor A3L precursor	215	233	K.VPFNPgNDTFESEFYLDEKR.S	0.0000040000000000000.0	220
IPI00200591	Tax_Id=10116 Gene_Symbol=LOC299282 Serine protease inhibitor A3L precursor	264	279	K.YTGgNASALFILPDQGK.M	0.0004000000000000.0	267
IPI00200593	Tax_Id=10116 Gene_Symbol=Serpina3k Serine protease inhibitor A3K precursor	101	121	K.FgNLTEITEEEIHQGFGHLLQR.L	0.040000000000000000000.0	102
IPI00200593	Tax_Id=10116 Gene_Symbol=Serpina3k Serine protease inhibitor A3K precursor	174	187	K.KFINDYVSgNQTQGK.I	0.00000000400000.0	182
IPI00200593	Tax_Id=10116 Gene_Symbol=Serpina3k Serine protease inhibitor A3K precursor	175	187	K.FINDYVSgNQTQGK.I	0.0000000400000.0	182
IPI00200593	Tax_Id=10116 Gene_Symbol=Serpina3k Serine protease inhibitor A3K precursor	175	187	K.FINDYVSgNQTQGK.I	0.0040000400000.0	182
IPI00200593	Tax_Id=10116 Gene_Symbol=Serpina3k Serine protease inhibitor A3K precursor	213	232	K.WKVPFNPgNDTFESEFYLDEK.R	0.00000004000000000000.0	220
IPI00200593	Tax_Id=10116 Gene_Symbol=Serpina3k Serine protease inhibitor A3K precursor	213	233	K.WKVPFNPgNDTFESEFYLDEKR.S	0.000000040000000000000.0	220
IPI00200593	Tax_Id=10116 Gene_Symbol=Serpina3k Serine protease inhibitor A3K precursor	215	232	K.VPFNPgNDTFESEFYLDEK.R	0.000004000000000000.0	220
IPI00200593	Tax_Id=10116 Gene_Symbol=Serpina3k Serine protease inhibitor A3K precursor	215	233	K.VPFNPgNDTFESEFYLDEKR.S	0.0000040000000000000.0	220
IPI00200593	Tax_Id=10116 Gene_Symbol=Serpina3k Serine protease inhibitor A3K precursor	264	279	K.YTGgNASALFILPDQGK.M	0.0004000000000000.0	267
IPI00200640	Tax_Id=10116 Gene_Symbol=Mucdhl Isoform 1 of Mucin and cadherin-like protein precursor	133	141	K.EYgNVSEDTR.V	0.004000000.0	135
IPI00200640	Tax_Id=10116 Gene_Symbol=Mucdhl Isoform 1 of Mucin and cadherin-like protein precursor	154	176	K.ATDADKDDILVYTLQEVTPgNASK.F	0.00000000000000000004000.0	173
IPI00200640	Tax_Id=10116 Gene_Symbol=Mucdhl Isoform 1 of Mucin and cadherin-like protein precursor	433	443	R.IEVEAgNNTVTK.D	0.00000400000.0	438
IPI00200661	Tax_Id=10116 Gene_Symbol=Fasn Fatty acid synthase	2444	2465	K.TGGTYGEDLGADYgNLSQVCDGK.V	0.0000000000000400000000.0	2457
IPI00200757	Tax_Id=10116 Gene_Symbol=Fn1 Isoform 1 of Fibronectin precursor	516	533	R.DQCIVDDITYNVgNDTFHK.R	0.000000000000400000.0	528
IPI00200757	Tax_Id=10116 Gene_Symbol=Fn1 Isoform 1 of Fibronectin precursor	996	1010	K.LDAPTNLQFVgNETDR.T	0.000000000040000.0	1006
IPI00200898	Tax_Id=10116 Gene_Symbol=Slc9a3r1 Ezrin-radixin-moesin-binding phosphoprotein 50	302	329	K.RHDSTEPSSTSSSSDPILDFgNISLAVAK.E	0.0000000000000000000040000000.0	322
IPI00200998	Tax_Id=10116 Gene_Symbol=Pdzk1 PDZ domain-containing protein 1	172	199	K.AGVLADDHLIEVNGENVEgNASHEEVVEK.V	0.0000000000000000004000000000.0	190
IPI00200998	Tax_Id=10116 Gene_Symbol=Pdzk1 PDZ domain-containing protein 1	172	199	K.AGVLADDHLIEVNGENVEgNASHEEVVEK.V	0.0000000000000004004000000000.0	190
IPI00200998	Tax_Id=10116 Gene_Symbol=Pdzk1 PDZ domain-containing protein 1	172	199	K.AGVLADDHLIEVNGENVEgNASHEEVVEK.V	0.0000000000004000004000000000.0	190
IPI00201262	Tax_Id=10116 Gene_Symbol=LOC297568;Mug2;Mug1 Alpha-1-inhibitor 3 precursor	386	404	K.ARDAGYTgNATTTDQHGLAK.F	0.0000000400000000000.0	393
IPI00201262	Tax_Id=10116 Gene_Symbol=LOC297568;Mug2;Mug1 Alpha-1-inhibitor 3 precursor	388	404	R.DAGYTgNATTTDQHGLAK.F	0.00000400000000000.0	393
IPI00201262	Tax_Id=10116 Gene_Symbol=LOC297568;Mug2;Mug1 Alpha-1-inhibitor 3 precursor	867	880	K.SLGNVgNFSVSAEAR.Q	0.00000400000000.0	872
IPI00201262	Tax_Id=10116 Gene_Symbol=LOC297568;Mug2;Mug1 Alpha-1-inhibitor 3 precursor	992	1002	K.YLgNETQQLTEK.I	0.00400000000.0	994
IPI00201276	Tax_Id=10116 Gene_Symbol=Acp2 Lysosomal acid phosphatase precursor	110	150	R.TLMSAEANLAGLFPPTEVQHFNPgNISWQPIPVHTVPITEDR.L	0.00100000000000000000000400000000000000000.0	133
IPI00201276	Tax_Id=10116 Gene_Symbol=Acp2 Lysosomal acid phosphatase precursor	162	170	R.YEQLQgNETR.Q	0.000004000.0	167
IPI00201276	Tax_Id=10116 Gene_Symbol=Acp2 Lysosomal acid phosphatase precursor	87	97	R.YHGFLgNASYHR.Q	0.00000400000.0	92
IPI00201298	Tax_Id=10116 Gene_Symbol=Pomt1 Protein O-mannosyl-transferase 1	467	477	R.FVHVgNTSAILK.L	0.00004000000.0	471
IPI00201413	Tax_Id=10116 Gene_Symbol=Acaa2 3-ketoacyl-CoA thiolase, mitochondrial	333	360	K.SLDLDPSKTgNVSGGAIALGHPLGGSGSR.I	0.0000000004000000000000000000.0	342
IPI00201489	Tax_Id=10116 Gene_Symbol=Ppif Peptidyl-prolyl cis-trans isomerase, mitochondrial precursor	37	60	R.GAgNSSSQNPLVYLDVGADGQPLGR.V	0.004000000000000000000000.0	39
IPI00201617	Tax_Id=10116 Gene_Symbol=LOC259244;Obp3 Alpha-2u globulin	49	58	R.EKIEEgNGSMR.V	0.0000040010.0	54
IPI00201617	Tax_Id=10116 Gene_Symbol=LOC259244;Obp3 Alpha-2u globulin	51	58	K.IEEgNGSMR.V	0.00040000.0	54
IPI00202440	Tax_Id=10116 Gene_Symbol=Igh-1a Igh-1a protein	315	323	R.EEQYgNSTFR.V	0.000040000.0	319
IPI00203384	Tax_Id=10116 Gene_Symbol=Klkb1 Plasma kallikrein precursor	447	460	R.IYGGILgNLSEITNK.T	0.00000040000000.0	453
IPI00203522	Tax_Id=10116 Gene_Symbol=Rnh1 Ribonuclease inhibitor	60	81	R.TNELGDAGVGLVLQGLQgNPTCK.I	0.0000000000000000040000.0	77
IPI00203690	Tax_Id=10116 Gene_Symbol=Aldh9a1 4-trimethylaminobutyraldehyde dehydrogenase	299	317	K.GALLANFLTQGQVCCgNGTR.V	0.0000000000000004000.0	314
IPI00204006	Tax_Id=10116 Gene_Symbol=Fbn1 Fibrillin-1	445	458	K.VLPFgNVTDYCQLVR.Y	0.00004000000000.0	449
IPI00204348	Tax_Id=10116 Gene_Symbol=Nt5e 5~-nucleotidase precursor	294	317	K.VEFDDKGNVVTSYGNPILLgNSTIR.E	0.000000000000000000040000.0	313
IPI00204348	Tax_Id=10116 Gene_Symbol=Nt5e 5~-nucleotidase precursor	331	343	R.IKLDgNYSTQELGR.T	0.0000400000000.0	335
IPI00204348	Tax_Id=10116 Gene_Symbol=Nt5e 5~-nucleotidase precursor	344	356	R.TIVYLgNGSAQECR.F	0.0000040000000.0	349
IPI00204451	Tax_Id=10116 Gene_Symbol=Cfi Complement factor I precursor	507	518	R.WGEVDLIGgNCSR.F	0.000000004000.0	515
IPI00204504	Tax_Id=10116 Gene_Symbol=Plvap Plasmalemma vesicle-associated protein	111	116	R.IgNASFR.Q	0.040000.0	112
IPI00204504	Tax_Id=10116 Gene_Symbol=Plvap Plasmalemma vesicle-associated protein	66	85	R.ADNLYSQVVGLSAAQAgNLSK.Q	0.00000000000000004000.0	82
IPI00204504	Tax_Id=10116 Gene_Symbol=Plvap Plasmalemma vesicle-associated protein	86	94	K.QLgNISTLVK.D	0.004000000.0	88
IPI00204776	Tax_Id=10116 Gene_Symbol=Akap8 A-kinase anchor protein 8	540	583	K.GEDPFVgNETADLETEGDENLGEEKETPEEVAAEVLAEVITAAVK.A	0.00000040000000000000000000000000000000000000.0	546
IPI00204808	Tax_Id=10116 Gene_Symbol=Mep1b Meprin A subunit beta precursor	186	214	K.EHNFNIYgNDSVSDSLNVPYDYTSVMHYSK.T	0.00000004000000000000000010000.0	193
IPI00204808	Tax_Id=10116 Gene_Symbol=Mep1b Meprin A subunit beta precursor	215	228	K.TAFQgNGTESTIITK.I	0.00004000000000.0	219
IPI00204808	Tax_Id=10116 Gene_Symbol=Mep1b Meprin A subunit beta precursor	539	553	K.VGVEAFFPgNGTQFSR.G	0.000000004000000.0	547
IPI00205018	Tax_Id=10116 Gene_Symbol=Aldh6a1 Methylmalonate-semialdehyde dehydrogenase [acylating], mitochondrial precursor	439	460	K.IVNDNPYGgNGTAIFTTNGAIAR.K	0.0000000040000000000000.0	447
IPI00205018	Tax_Id=10116 Gene_Symbol=Aldh6a1 Methylmalonate-semialdehyde dehydrogenase [acylating], mitochondrial precursor	439	460	K.IVNDNPYGgNGTAIFTTNGAIAR.K	0.0000000040000000400000.0	447
IPI00205135	Tax_Id=10116 Gene_Symbol=Tgm2 Transglutaminase 2, C polypeptide	513	544	R.TVSYNGVLGPECGTEDIgNLTLDPYSENSIPLR.I	0.00000000000000000400000000000000.0	530
IPI00205166	Tax_Id=10116 Gene_Symbol=Itga6 similar to integrin alpha 6 isoform 2	922	933	R.KYQTLgNCSVNVR.C	0.000004000000.0	927
IPI00205166	Tax_Id=10116 Gene_Symbol=Itga6 similar to integrin alpha 6 isoform 2	923	933	K.YQTLgNCSVNVR.C	0.00004000000.0	927
IPI00205166	Tax_Id=10116 Gene_Symbol=Itga6 similar to integrin alpha 6 isoform 2	956	967	R.LWgNSTFLEEYSK.L	0.004000000000.0	958
IPI00205325	Tax_Id=10116 Gene_Symbol=Lrp2 Low-density lipoprotein receptor-related protein 2 precursor	141	163	R.NCHYPTCDQLTCANGACYgNTSQR.C	0.00000000000004000040000.0	159
IPI00205325	Tax_Id=10116 Gene_Symbol=Lrp2 Low-density lipoprotein receptor-related protein 2 precursor	1491	1502	K.TWSVFQgNGTDKR.V	0.000000400000.0	1497
IPI00205325	Tax_Id=10116 Gene_Symbol=Lrp2 Low-density lipoprotein receptor-related protein 2 precursor	1545	1556	R.TVLISKgNVTKPR.G	0.000000400000.0	1551
IPI00205325	Tax_Id=10116 Gene_Symbol=Lrp2 Low-density lipoprotein receptor-related protein 2 precursor	172	186	R.DSSDEAgNCTTLCSQK.E	0.000000400000000.0	178
IPI00205325	Tax_Id=10116 Gene_Symbol=Lrp2 Low-density lipoprotein receptor-related protein 2 precursor	1723	1743	R.HYSCACPSGWgNLSDDSVNCVR.G	0.000000000040000000000.0	1733
IPI00205325	Tax_Id=10116 Gene_Symbol=Lrp2 Low-density lipoprotein receptor-related protein 2 precursor	2382	2400	K.SCATSQEDFLIYSLgNNSLR.S	0.0000000000000040000.0	2396
IPI00205325	Tax_Id=10116 Gene_Symbol=Lrp2 Low-density lipoprotein receptor-related protein 2 precursor	2481	2501	R.IYYSDFSgNQTINSMAEDGSNR.A	0.000000040000010000000.0	2488
IPI00205325	Tax_Id=10116 Gene_Symbol=Lrp2 Low-density lipoprotein receptor-related protein 2 precursor	278	304	R.CISIDKVCDGVPDCPEGDDENgNVTSGR.T	0.000000000000000000000400000.0	299
IPI00205325	Tax_Id=10116 Gene_Symbol=Lrp2 Low-density lipoprotein receptor-related protein 2 precursor	2780	2793	R.NCgNSTTEFTCSNGR.C	0.00400000000000.0	2782
IPI00205325	Tax_Id=10116 Gene_Symbol=Lrp2 Low-density lipoprotein receptor-related protein 2 precursor	2780	2793	R.NCgNSTTEFTCSNGR.C	0.00400000000400.0	2782
IPI00205325	Tax_Id=10116 Gene_Symbol=Lrp2 Low-density lipoprotein receptor-related protein 2 precursor	284	304	K.VCDGVPDCPEGDDENgNVTSGR.T	0.000000000000000400000.0	299
IPI00205325	Tax_Id=10116 Gene_Symbol=Lrp2 Low-density lipoprotein receptor-related protein 2 precursor	3308	3326	K.MIAQHCVDAgNNTFCFEHPR.G	0.1000000004000000000.0	3317
IPI00205325	Tax_Id=10116 Gene_Symbol=Lrp2 Low-density lipoprotein receptor-related protein 2 precursor	3444	3463	R.VVLVgNTTHKPFDIHVYHPYR.Q	0.00004000000000000000.0	3448
IPI00205325	Tax_Id=10116 Gene_Symbol=Lrp2 Low-density lipoprotein receptor-related protein 2 precursor	3564	3577	R.DGgNCTSPQALCNAR.Q	0.00400000000000.0	3566
IPI00205325	Tax_Id=10116 Gene_Symbol=Lrp2 Low-density lipoprotein receptor-related protein 2 precursor	3564	3577	R.DGgNCTSPQALCNAR.Q	0.00400000000400.0	3566
IPI00205325	Tax_Id=10116 Gene_Symbol=Lrp2 Low-density lipoprotein receptor-related protein 2 precursor	4328	4337	R.YgNQSVSNPCK.Q	0.0400000000.0	4329
IPI00205325	Tax_Id=10116 Gene_Symbol=Lrp2 Low-density lipoprotein receptor-related protein 2 precursor	447	479	K.VFSTDINGLNTQEILgNVSVDTPENLAVDWINNK.L	0.000000000000000400000000000000000.0	462
IPI00205325	Tax_Id=10116 Gene_Symbol=Lrp2 Low-density lipoprotein receptor-related protein 2 precursor	447	479	K.VFSTDINGLNTQEILgNVSVDTPENLAVDWINNK.L	0.000000400000000400000000000000000.0	462
IPI00205333	Tax_Id=10116 Gene_Symbol=Gpr116 Probable G-protein coupled receptor 116 precursor	659	681	K.LTLVPGKgNITCQDPIIGIGEPGK.V	0.00000004000000000000000.0	666
IPI00205606	Tax_Id=10116 Gene_Symbol=Sel1h Protein sel-1 homolog 1 precursor	601	613	R.EATIVGEgNETYPR.A	0.0000000400000.0	608
IPI00206254	Tax_Id=10116 Gene_Symbol=Ggt1 Gamma-glutamyltranspeptidase 1 precursor	112	122	R.LAgNTSMFgNNSK.D	0.00400104000.0	114119
IPI00206254	Tax_Id=10116 Gene_Symbol=Ggt1 Gamma-glutamyltranspeptidase 1 precursor	112	138	R.LANTSMFgNNSKDSEEGGLSVAVPGEIR.G	0.000001044000000000000000000.0	119
IPI00206254	Tax_Id=10116 Gene_Symbol=Ggt1 Gamma-glutamyltranspeptidase 1 precursor	226	238	R.AFYgNGSLTAQIVK.D	0.0004000000000.0	229
IPI00206254	Tax_Id=10116 Gene_Symbol=Ggt1 Gamma-glutamyltranspeptidase 1 precursor	343	354	R.gNMSSEFYATQLR.A	0.410000000000.0	343
IPI00206254	Tax_Id=10116 Gene_Symbol=Ggt1 Gamma-glutamyltranspeptidase 1 precursor	411	446	R.VSGILFNDEMDDFSSPgNFTNQFGVAPSPANFIKPGK.Q	0.000000000100000040000000000000000000.0	427
IPI00206254	Tax_Id=10116 Gene_Symbol=Ggt1 Gamma-glutamyltranspeptidase 1 precursor	411	446	R.VSGILFNDEMDDFSSPgNFTNQFGVAPSPANFIKPGK.Q	0.000000000100000040000000000004000000.0	427
IPI00206254	Tax_Id=10116 Gene_Symbol=Ggt1 Gamma-glutamyltranspeptidase 1 precursor	411	446	R.VSGILFNDEMDDFSSPgNFTNQFGVAPSPANFIKPGK.Q	0.000000000100000040040000000000000000.0	427
IPI00206254	Tax_Id=10116 Gene_Symbol=Ggt1 Gamma-glutamyltranspeptidase 1 precursor	503	516	R.LHNQLLPgNTTTVEK.N	0.00000004000000.0	510
IPI00206254	Tax_Id=10116 Gene_Symbol=Ggt1 Gamma-glutamyltranspeptidase 1 precursor	503	516	R.LHNQLLPgNTTTVEK.N	0.00400004000000.0	510
IPI00206268	Tax_Id=10116 Gene_Symbol=- 32 kDa protein	187	209	R.TGDFQLHTNVNgNGTEFGGSIYQK.K	0.00000000000400000000000.0	198
IPI00206268	Tax_Id=10116 Gene_Symbol=- 32 kDa protein	88	109	K.WNTgNNTLGTEIAIENQICQGLK.L	0.0004000000000000000000.0	91
IPI00206268	Tax_Id=10116 Gene_Symbol=- 32 kDa protein	88	109	K.WNTgNNTLGTEIAIENQICQGLK.L	0.0004000000000040000000.0	91
IPI00206298	Tax_Id=10116 Gene_Symbol=Lgmn Legumain precursor	262	275	K.SHTgNTSHVMQYGNK.S	0.00040000100040.0	265
IPI00206298	Tax_Id=10116 Gene_Symbol=Lgmn Legumain precursor	61	99	R.NGIPDEQIIVMMYDDIANNEENPTPGVVINRPgNGTDVYK.G	0.000000000011000000000000000004004000000.0	93
IPI00206298	Tax_Id=10116 Gene_Symbol=Lgmn Legumain precursor	61	99	R.NGIPDEQIIVMMYDDIANNEENPTPGVVINRPgNGTDVYK.G	0.400000000011000000000000000004004000000.0	93
IPI00206336	Tax_Id=10116 Gene_Symbol=Lamp1 Lysosome-associated membrane glycoprotein 1 precursor	57	70	K.VSgNMTLPASAEVLK.N	0.00400000000000.0	59
IPI00206336	Tax_Id=10116 Gene_Symbol=Lamp1 Lysosome-associated membrane glycoprotein 1 precursor	57	70	K.VSgNMTLPASAEVLK.N	0.00410000000000.0	59
IPI00206336	Tax_Id=10116 Gene_Symbol=Lamp1 Lysosome-associated membrane glycoprotein 1 precursor	97	105	K.LTFTKgNTTR.Y	0.000004000.0	102
IPI00206403	Tax_Id=10116 Gene_Symbol=Lum Lumican precursor	120	137	K.KLHINYNgNLTESVGPLPK.S	0.000000040000000000.0	127
IPI00206403	Tax_Id=10116 Gene_Symbol=Lum Lumican precursor	121	137	K.LHINYNgNLTESVGPLPK.S	0.00000040000000000.0	127
IPI00206403	Tax_Id=10116 Gene_Symbol=Lum Lumican precursor	85	106	K.AFEgNVTDLQWLILDHNLLENSK.I	0.0004000000000000000000.0	88
IPI00206823	Tax_Id=10116 Gene_Symbol=Obp3 Alpha-2u globulin	49	58	R.EKIEEgNGSMR.V	0.0000040010.0	54
IPI00206823	Tax_Id=10116 Gene_Symbol=Obp3 Alpha-2u globulin	51	58	K.IEEgNGSMR.V	0.00040000.0	54
IPI00207068	Tax_Id=10116 Gene_Symbol=Glg1 Golgi apparatus protein 1 precursor	156	163	K.LgNLTTDPK.F	0.04000000.0	157
IPI00207180	Tax_Id=10116 Gene_Symbol=Slc6a18 Sodium- and chloride-dependent transporter XTRP2	343	359	R.DEYPSVLMYLgNATQPER.V	0.00000001004000000.0	353
IPI00207668	Tax_Id=10116 Gene_Symbol=Afm Afamin precursor	396	407	R.HAEDKFgNETTER.S	0.000000400000.0	402
IPI00207702	Tax_Id=10116 Gene_Symbol=Slc22a8 Solute carrier family 22 member 8	91	105	R.ATEPCLDGWIYgNSTR.D	0.000000000004000.0	102
IPI00208205	Tax_Id=10116 Gene_Symbol=Hspa8 Heat shock cognate 71 kDa protein	138	155	K.TVTNAVVTVPAYFgNDSQR.Q	0.000000000000040000.0	151
IPI00208215	Tax_Id=10116 Gene_Symbol=Prdx3 Thioredoxin-dependent peroxide reductase, mitochondrial precursor	151	167	K.NGGLGHMgNITLLSDLTK.Q	0.00000004000000000.0	158
IPI00208422	Tax_Id=10116 Gene_Symbol=Dpp4 Dipeptidyl peptidase 4	514	524	K.KLDFIVLgNETR.F	0.00000004000.0	521
IPI00208422	Tax_Id=10116 Gene_Symbol=Dpp4 Dipeptidyl peptidase 4	515	524	K.LDFIVLgNETR.F	0.0000004000.0	521
IPI00208422	Tax_Id=10116 Gene_Symbol=Dpp4 Dipeptidyl peptidase 4	671	692	R.YMGLPTPEDNLDHYRgNSTVMSR.A	0.0100000000000004000100.0	686
IPI00208659	Tax_Id=10116 Gene_Symbol=Cfh Complement inhibitory factor H	1051	1068	K.DNSCVNPPHVPgNATILTR.H	0.000000000004000000.0	1062
IPI00208659	Tax_Id=10116 Gene_Symbol=Cfh Complement inhibitory factor H	757	779	K.STGIDAIHPNKNEFNHgNFSVSYR.C	0.00000000000000004000000.0	773
IPI00208721	Tax_Id=10116 Gene_Symbol=RGD1563141_predicted 78 kDa protein	613	625	K.ALSPgNSTISSAPK.D	0.0000400000000.0	617
IPI00208917	Tax_Id=10116 Gene_Symbol=Aldh7a1 similar to aldehyde dehydrogenase family 7, member A1	49	62	R.EDNEGVFgNGSWGGR.G	0.00000004000000.0	56
IPI00209265	Tax_Id=10116 Gene_Symbol=Ggh Gamma-glutamyl hydrolase precursor	175	195	R.NLPEELLNSLASEgNLTANFHK.W	0.000000000000040000000.0	188
IPI00209300	Tax_Id=10116 Gene_Symbol=Ptprj Vascular protein tyrosine phosphatase 1	403	417	R.GPgNGTEGPSQTVVGR.T	0.004000000000000.0	405
IPI00209908	Tax_Id=10116 Gene_Symbol=mt-Co2 Cytochrome c oxidase subunit 2	179	217	R.LNQATVTSNRPGLFYGQCSEICGSgNHSFMPIVLEMVPLK.Y	0.000000000000000000000000400000000010000.0	203
IPI00209975	Tax_Id=10116 Gene_Symbol=C4bpb C4b-binding protein beta chain precursor	215	225	K.DLCgNATENFVR.Q	0.00040000000.0	218
IPI00210027	Tax_Id=10116 Gene_Symbol=Itpr1 Isoform 1 of Inositol 1,4,5-trisphosphate receptor type 1	2500	2512	R.VETGEgNCTSPAPK.E	0.0000040000000.0	2505
IPI00210090	Tax_Id=10116 Gene_Symbol=Hnrpu SP120	38	68	R.LQAALDNEAGGRPAMEPGgNGSLDLGGDAAGR.S	0.0000000000000010004000000000000.0	56
IPI00210090	Tax_Id=10116 Gene_Symbol=Hnrpu SP120	38	68	R.LQAALDNEAGGRPAMEPGgNGSLDLGGDAAGR.S	0.0000004000000010004000000000000.0	56
IPI00210091	Tax_Id=10116 Gene_Symbol=Serpina3m similar to Serine protease inhibitor A3M precursor	266	279	K.YTGgNSSALFILPDK.G	0.00040000000000.0	269
IPI00210396	Tax_Id=10116 Gene_Symbol=Kl Klotho precursor	345	360	K.NgNLSSLLPDFTESEKR.F	0.0400000000000000.0	346
IPI00210824	Tax_Id=10116 Gene_Symbol=Serpina6 Corticosteroid-binding globulin precursor	306	328	K.DVLEDLNIKDLLTgNQSDFSGNTK.D	0.00000000000004000000000.0	319
IPI00210824	Tax_Id=10116 Gene_Symbol=Serpina6 Corticosteroid-binding globulin precursor	315	328	K.DLLTgNQSDFSGNTK.D	0.00004000000000.0	319
IPI00210824	Tax_Id=10116 Gene_Symbol=Serpina6 Corticosteroid-binding globulin precursor	340	362	K.AMLQLDEGNVLPgNSTNGAPLHLR.S	0.01000000000040000000000.0	352
IPI00210824	Tax_Id=10116 Gene_Symbol=Serpina6 Corticosteroid-binding globulin precursor	340	362	K.AMLQLDEGNVLPgNSTNGAPLHLR.S	0.01000000000040040000000.0	352
IPI00210872	Tax_Id=10116 Gene_Symbol=Mep1a Meprin A subunit alpha precursor	441	451	R.gNISQVLENTVK.G	0.40000000000.0	441
IPI00210872	Tax_Id=10116 Gene_Symbol=Mep1a Meprin A subunit alpha precursor	535	552	K.YQTSSAIgNGSVIWDRPTK.V	0.000000040000000000.0	542
IPI00210900	Tax_Id=10116 Gene_Symbol=Ambp AMBP protein precursor	226	245	K.KEDSCQLgNYSEGPCLGMQQK.Y	0.00000004000000001000.0	233
IPI00210900	Tax_Id=10116 Gene_Symbol=Ambp AMBP protein precursor	227	245	K.EDSCQLgNYSEGPCLGMQQK.Y	0.0000004000000001000.0	233
IPI00210975	Tax_Id=10116 Gene_Symbol=Hyou1 Hypoxia up-regulated protein 1 precursor	136	158	R.FQISPQLQFSPEEVLGMVLgNYSR.S	0.00000000000000001004000.0	155
IPI00210975	Tax_Id=10116 Gene_Symbol=Hyou1 Hypoxia up-regulated protein 1 precursor	510	520	R.VFGSQgNLTTVK.L	0.00000400000.0	515
IPI00210975	Tax_Id=10116 Gene_Symbol=Hyou1 Hypoxia up-regulated protein 1 precursor	822	837	R.LSALDNLLgNHSSIFLK.G	0.0000000040000000.0	830
IPI00210975	Tax_Id=10116 Gene_Symbol=Hyou1 Hypoxia up-regulated protein 1 precursor	860	868	K.VIgNDTWTWK.N	0.004000000.0	862
IPI00210975	Tax_Id=10116 Gene_Symbol=Hyou1 Hypoxia up-regulated protein 1 precursor	926	940	R.TEPPLgNASAGDQEEK.V	0.000004000000000.0	931
IPI00211075	Tax_Id=10116 Gene_Symbol=Serpina3n Serine protease inhibitor A3N precursor	103	115	K.FgNLTETPETEIHR.G	0.0400000000000.0	104
IPI00211075	Tax_Id=10116 Gene_Symbol=Serpina3n Serine protease inhibitor A3N precursor	244	265	K.LEDLTTPYVRDEELgNCTVVELK.Y	0.0000000000000040000000.0	258
IPI00211075	Tax_Id=10116 Gene_Symbol=Serpina3n Serine protease inhibitor A3N precursor	266	281	K.YTGgNASALFILPDQGK.M	0.0004000000000000.0	269
IPI00211075	Tax_Id=10116 Gene_Symbol=Serpina3n Serine protease inhibitor A3N precursor	91	115	K.GNSMEEILEGLKFgNLTETPETEIHR.G	0.0001000000000400000000000.0	104
IPI00211096	Tax_Id=10116 Gene_Symbol=Hsd11b1 Isoform 11-HSD1A of Corticosteroid 11-beta-dehydrogenase isozyme 1	156	170	K.QSgNGSIAIISSMAGK.M	0.004000000001000.0	158
IPI00211201	Tax_Id=10116 Gene_Symbol=F9 similar to coagulation factor IX	321	333	R.TIPHHQYgNATINK.Y	0.0000000400000.0	328
IPI00211230	Tax_Id=10116 Gene_Symbol=Tm2d3_predicted 26 kDa protein	137	144	R.YFAgNCTVR.D	0.00040000.0	140
IPI00211616	Tax_Id=10116 Gene_Symbol=Slc3a2 4F2 cell-surface antigen heavy chain	160	171	K.NQKDEVgNETDLK.Q	0.000000400000.0	166
IPI00211616	Tax_Id=10116 Gene_Symbol=Slc3a2 4F2 cell-surface antigen heavy chain	498	527	R.LSREEGTSLSLEgNLSLNPYEGLLLQFPFVA.-	0.000000000000400000000000000000.0	510
IPI00211648	Tax_Id=10116 Gene_Symbol=Slc3a1 Neutral and basic amino acid transport protein rBAT	321	339	K.DLRNEIQVgNTSQIPDTVTR.Y	0.0000000040000000000.0	329
IPI00211648	Tax_Id=10116 Gene_Symbol=Slc3a1 Neutral and basic amino acid transport protein rBAT	324	339	R.NEIQVgNTSQIPDTVTR.Y	0.0000040000000000.0	329
IPI00211648	Tax_Id=10116 Gene_Symbol=Slc3a1 Neutral and basic amino acid transport protein rBAT	324	339	R.NEIQVgNTSQIPDTVTR.Y	0.4000040000000000.0	329
IPI00211648	Tax_Id=10116 Gene_Symbol=Slc3a1 Neutral and basic amino acid transport protein rBAT	572	581	R.DDgNHSVVYTR.E	0.0040000000.0	574
IPI00211989	Tax_Id=10116 Gene_Symbol=Khk Isoform C of Ketohexokinase	79	108	R.RGVDVSQVAWQSQGDTPCSCCIVNNSgNGSR.T	0.000000000000000000000000004000.0	105
IPI00211989	Tax_Id=10116 Gene_Symbol=Khk Isoform C of Ketohexokinase	80	108	R.GVDVSQVAWQSQGDTPCSCCIVNNSgNGSR.T	0.00000000000000000000000004000.0	105
IPI00212666	Tax_Id=10116 Gene_Symbol=Mug1 Isoform 1 of Murinoglobulin-1 precursor	1002	1012	K.YLgNETQQLTEK.I	0.00400000000.0	1004
IPI00212666	Tax_Id=10116 Gene_Symbol=Mug1 Isoform 1 of Murinoglobulin-1 precursor	386	404	K.AQEAGYTgNATTTDQHGLAK.F	0.0000000400000000000.0	393
IPI00212708	Tax_Id=10116 Gene_Symbol=Fetub Fetub protein	146	162	R.RVLYLPAYgNCTLRPVSK.R	0.00000000400000000.0	154
IPI00212708	Tax_Id=10116 Gene_Symbol=Fetub Fetub protein	147	162	R.VLYLPAYgNCTLRPVSK.R	0.0000000400000000.0	154
IPI00212730	Tax_Id=10116 Gene_Symbol=Lamp2 Lysosome-associated membrane glycoprotein 2 precursor	353	360	K.VQPFgNVTK.G	0.00004000.0	357
IPI00212731	Tax_Id=10116 Gene_Symbol=Ctsd Cathepsin D precursor	249	261	R.YYHGELSYLgNVTR.K	0.0000000004000.0	258
IPI00212811	Tax_Id=10116 Gene_Symbol=Ctsb Cathepsin B precursor	165	206	R.KGLVSGGVYNSHIGCLPYTIPPCEHHVgNGSRPPCTGEGDTPK.C	0.000000000000000000000000000400000000000000.0	192
IPI00212868	Tax_Id=10116 Gene_Symbol=Lamb2 Laminin subunit beta-2 precursor	1306	1315	R.DGLALgNLTLR.Q	0.0000040000.0	1311
IPI00212868	Tax_Id=10116 Gene_Symbol=Lamb2 Laminin subunit beta-2 precursor	1494	1505	R.AQAALDKAgNASR.G	0.000000004000.0	1502
IPI00212933	Tax_Id=10116 Gene_Symbol=Slc5a1 Sodium/glucose cotransporter 1	239	252	K.AIPTLVSDGgNITVK.E	0.00000000040000.0	248
IPI00212933	Tax_Id=10116 Gene_Symbol=Slc5a1 Sodium/glucose cotransporter 1	565	598	R.gNSTEERIDLDAGEEEPVEEDPKDTIEIDAEAPQK.E	0.4000000000000000000000000000000000.0	565
IPI00213036	Tax_Id=10116 Gene_Symbol=C4a Complement C4 precursor	1321	1331	K.ALgNVTLSSMGR.N	0.00400000100.0	1323
IPI00213182	Tax_Id=10116 Gene_Symbol=Cpd Isoform 1 of Carboxypeptidase D precursor	170	189	R.LLgNTTDVYLLPSLNPDGFER.A	0.00400000000000000000.0	172
IPI00213569	Tax_Id=10116 Gene_Symbol=Ugt1a1 UDP-glucuronosyltransferase 1-1 precursor	80	99	R.KYPVPFQNEgNVTAAFVELGR.S	0.00000000040000000000.0	89
IPI00213569	Tax_Id=10116 Gene_Symbol=Ugt1a1 UDP-glucuronosyltransferase 1-1 precursor	81	99	K.YPVPFQNEgNVTAAFVELGR.S	0.0000000040000000000.0	89
IPI00213579	Tax_Id=10116 Gene_Symbol=Tpp2 Tripeptidyl-peptidase 2	152	168	R.KQEEFDIANgNGSSQANK.L	0.00000000040000000.0	161
IPI00213584	Tax_Id=10116 Gene_Symbol=Agxt2 Alanine--glyoxylate aminotransferase 2, mitochondrial precursor	265	300	R.YIEQFKDTLgNTSVATSIAGFFAEPIQGVNGVVQYPK.E	0.000000000400000000000000000000000000.0	274
IPI00213584	Tax_Id=10116 Gene_Symbol=Agxt2 Alanine--glyoxylate aminotransferase 2, mitochondrial precursor	265	300	R.YIEQFKDTLgNTSVATSIAGFFAEPIQGVNGVVQYPK.E	0.000000000400000000000000000040000000.0	274
IPI00213644	Tax_Id=10116 Gene_Symbol=Ppib Peptidyl-prolyl cis-trans isomerase B precursor	146	158	K.DTgNGSQFFITTVK.T	0.0040000000000.0	148
IPI00214299	Tax_Id=10116 Gene_Symbol=Cbs Isoform I of Cystathionine beta-synthase	274	314	K.IIGVDPEGSILAEPEELgNQTEQTAYEVEGIGYDFIPTVLDR.A	0.00000000000000000400000000000000000000000.0	291
IPI00214373	Tax_Id=10116 Gene_Symbol=Aadat Kynurenine/alpha-aminoadipate aminotransferase mitochondrial precursor	50	62	K.SAVFTVEgNGSTIR.F	0.0000000400000.0	57
IPI00214373	Tax_Id=10116 Gene_Symbol=Aadat Kynurenine/alpha-aminoadipate aminotransferase mitochondrial precursor	50	70	K.SAVFTVEgNGSTIRFEGEMFQR.A	0.000000040000000001000.0	57
IPI00214787	Tax_Id=10116 Gene_Symbol=Slc16a1 Monocarboxylate transporter 1	473	494	K.ETQSPAPLQgNSSGDPAEEESPV.-	0.0000000004000000000000.0	482
IPI00214859	Tax_Id=10116 Gene_Symbol=Col18a1 similar to Collagen alpha-1(XVIII) chain precursor	587	611	R.DGQQgNISLLYTEPGASQTQTGASFR.L	0.0000400000000000000000000.0	591
IPI00215190	Tax_Id=10116 Gene_Symbol=Fkbp9 FK506-binding protein 9 precursor	171	189	R.YHYgNGTFLDGTLFDSSHNR.M	0.0004000000000000000.0	174
IPI00215190	Tax_Id=10116 Gene_Symbol=Fkbp9 FK506-binding protein 9 precursor	283	301	R.YHYgNGTLLDGTLFDSSYSR.N	0.0004000000000000000.0	286
IPI00215357	Tax_Id=10116 Gene_Symbol=Cdh6 Cadherin-6 precursor	430	444	R.IFNIDSGgNGSIFTSK.L	0.000000040000000.0	437
IPI00230859	Tax_Id=10116 Gene_Symbol=Akr1a1 Alcohol dehydrogenase	43	61	R.HIDCASVYGgNETEIGEALK.E	0.0000000004000000000.0	52
IPI00230859	Tax_Id=10116 Gene_Symbol=Akr1a1 Alcohol dehydrogenase	43	68	R.HIDCASVYGgNETEIGEALKESVGAGK.A	0.00000000040000000000000000.0	52
IPI00230862	Tax_Id=10116 Gene_Symbol=Anpep Aminopeptidase N	111	125	R.FTCgNETTNVIIIHSK.K	0.000400000000000.0	114
IPI00230862	Tax_Id=10116 Gene_Symbol=Anpep Aminopeptidase N	231	252	K.ASFNITLIHPNgNLTALSNMLPK.D	0.0000000000040000001000.0	242
IPI00230862	Tax_Id=10116 Gene_Symbol=Anpep Aminopeptidase N	231	252	K.ASFNITLIHPNgNLTALSNMLPK.D	0.0000000000440000001000.0	242
IPI00230862	Tax_Id=10116 Gene_Symbol=Anpep Aminopeptidase N	231	252	K.ASFNITLIHPNgNLTALSNMLPK.D	0.0000000000440000041000.0	242
IPI00230862	Tax_Id=10116 Gene_Symbol=Anpep Aminopeptidase N	231	252	K.ASFgNITLIHPNNLTALSNMLPK.D	0.0004000000000000001000.0	234
IPI00230862	Tax_Id=10116 Gene_Symbol=Anpep Aminopeptidase N	231	252	K.ASFgNITLIHPNNLTALSNMLPK.D	0.0004000000400000001000.0	234
IPI00230862	Tax_Id=10116 Gene_Symbol=Anpep Aminopeptidase N	231	252	K.ASFgNITLIHPNgNLTALSNMLPK.D	0.0004000000040000000000.0	234242
IPI00230862	Tax_Id=10116 Gene_Symbol=Anpep Aminopeptidase N	231	252	K.ASFgNITLIHPNgNLTALSNMLPK.D	0.0004000000040000001000.0	234242
IPI00230862	Tax_Id=10116 Gene_Symbol=Anpep Aminopeptidase N	231	252	K.ASFgNITLIHPNgNLTALSNMLPK.D	0.0004000000040000041000.0	234242
IPI00230862	Tax_Id=10116 Gene_Symbol=Anpep Aminopeptidase N	231	252	K.ASFgNITLIHPNgNLTALSNMLPK.D	0.0004000000440000001000.0	234242
IPI00230862	Tax_Id=10116 Gene_Symbol=Anpep Aminopeptidase N	256	273	R.TLQEDPSWgNVTEFHPTPK.M	0.000000004000000000.0	264
IPI00231136	Tax_Id=10116 Gene_Symbol=Nid1 similar to Nidogen-1 precursor	413	422	R.CVAgNYTGNGR.Q	0.0004000000.0	416
IPI00231136	Tax_Id=10116 Gene_Symbol=Nid1 similar to Nidogen-1 precursor	413	422	R.CVAgNYTGNGR.Q	0.0004000400.0	416
IPI00231197	Tax_Id=10116 Gene_Symbol=Cd36 Platelet glycoprotein 4	407	426	K.RPYIVPILWLgNETGTIGDEK.A	0.00000000004000000000.0	417
IPI00231197	Tax_Id=10116 Gene_Symbol=Cd36 Platelet glycoprotein 4	97	108	R.YLAKEgNITQDPK.D	0.000004000000.0	102
IPI00231247	Tax_Id=10116 Gene_Symbol=Map2k1 Dual specificity mitogen-activated protein kinase kinase 1	4	35	K.KKPTPIQLNPAPDGSAVgNGTSSAETNLEALQK.K	0.00000000000000000400000000000000.0	21
IPI00231264	Tax_Id=10116 Gene_Symbol=Pon1 Serum paraoxonase/arylesterase 1	33	46	R.EVTPVDLPgNCTLVK.G	0.00000000400000.0	41
IPI00231359	Tax_Id=10116 Gene_Symbol=Acads Acetyl-Coenzyme A dehydrogenase, short chain	151	173	K.IGCFALSEPGgNGSDAGAASTTAR.E	0.00000000004000000000000.0	161
IPI00231359	Tax_Id=10116 Gene_Symbol=Acads Acetyl-Coenzyme A dehydrogenase, short chain	174	185	R.EEGDSWVLgNGTK.A	0.000000004000.0	182
IPI00231423	Tax_Id=10116 Gene_Symbol=C9 C9 protein	263	279	K.KVGVDEVSPEKgNSSKPK.D	0.00000000000400000.0	274
IPI00231423	Tax_Id=10116 Gene_Symbol=C9 C9 protein	264	279	K.VGVDEVSPEKgNSSKPK.D	0.0000000000400000.0	274
IPI00231478	Tax_Id=10116 Gene_Symbol=Scarb2 Lysosome membrane protein 2	116	134	K.AYIFERgNQSVGDPTVDLIR.T	0.0000004000000000000.0	122
IPI00231601	Tax_Id=10116 Gene_Symbol=Ptprc Isoform 4 of Leukocyte common antigen precursor	115	121	K.FGgNVTVR.Y	0.0040000.0	117
IPI00231611	Tax_Id=10116 Gene_Symbol=Fh1 Isoform Mitochondrial of Fumarate hydratase, mitochondrial precursor	181	210	K.SQSSgNDTFPTAMHIAAALEVHQVLLPGLQK.L	0.000040000000000000000000000000.0	185
IPI00231767	Tax_Id=10116 Gene_Symbol=Tpi1 Triosephosphate isomerase	195	206	K.CgNVSEGVAQCTR.I	0.040000000000.0	196
IPI00231789	Tax_Id=10116 Gene_Symbol=Mme Neprilysin	142	152	R.SCIgNESAIDSR.G	0.00040000000.0	145
IPI00231789	Tax_Id=10116 Gene_Symbol=Mme Neprilysin	276	293	K.VMELEKEIAgNATTKPEDR.N	0.010000000400000000.0	285
IPI00231789	Tax_Id=10116 Gene_Symbol=Mme Neprilysin	282	293	K.EIAgNATTKPEDR.N	0.000400000000.0	285
IPI00231789	Tax_Id=10116 Gene_Symbol=Mme Neprilysin	282	302	K.EIAgNATTKPEDRNDPMLLYNK.M	0.000400000000000100000.0	285
IPI00231848	Tax_Id=10116 Gene_Symbol=Egf Pro-epidermal growth factor precursor	102	114	R.VFFgNGSGQETVCK.V	0.0004000000000.0	105
IPI00231862	Tax_Id=10116 Gene_Symbol=Gclc Glutamate--cysteine ligase catalytic subunit	579	604	R.EFIANHPDYKQDSVITDEIgNYSLILK.C	0.00000000000000000004000000.0	598
IPI00324019	Tax_Id=10116 Gene_Symbol=Serpina1 Alpha-1-antiproteinase precursor	92	112	R.KQILEGLEFgNLTQIPEADIHK.A	0.000000000400000000000.0	101
IPI00324019	Tax_Id=10116 Gene_Symbol=Serpina1 Alpha-1-antiproteinase precursor	93	112	K.QILEGLEFgNLTQIPEADIHK.A	0.00000000400000000000.0	101
IPI00324020	Tax_Id=10116 Gene_Symbol=Glul Glutamine synthetase	228	259	R.VCEDFGVIATFDPKPIPGNWNGAGCHTgNFSTK.A	0.00000000000000000000000000040000.0	255
IPI00324020	Tax_Id=10116 Gene_Symbol=Glul Glutamine synthetase	358	373	R.TCLLgNETGDEPFQYKN.-	0.0000400000000000.0	362
IPI00324102	Tax_Id=10116 Gene_Symbol=Fgl2 fibrinogen-like 2	167	180	K.VAgNLTSVVNSLDSK.C	0.00400000000000.0	169
IPI00324300	Tax_Id=10116 Gene_Symbol=Ace Angiotensin-converting enzyme, somatic isoform precursor	144	155	R.LQYNSLLSgNMSR.I	0.000000004100.0	152
IPI00324585	Tax_Id=10116 Gene_Symbol=Itga1 Integrin alpha-1 precursor	1097	1107	R.AHFSSLgNLTLR.G	0.00000040000.0	1103
IPI00324585	Tax_Id=10116 Gene_Symbol=Itga1 Integrin alpha-1 precursor	1112	1124	K.SEgNSSLTLSSSNR.K	0.0040000000000.0	1114
IPI00324585	Tax_Id=10116 Gene_Symbol=Itga1 Integrin alpha-1 precursor	410	427	K.ANQMVIPHgNTTFQTEPAK.M	0.000100004000000000.0	418
IPI00324585	Tax_Id=10116 Gene_Symbol=Itga1 Integrin alpha-1 precursor	458	468	R.YgNHTGQVVIYK.M	0.04000000000.0	459
IPI00324585	Tax_Id=10116 Gene_Symbol=Itga1 Integrin alpha-1 precursor	525	534	K.VYVYAVgNQTR.F	0.0000004000.0	531
IPI00324585	Tax_Id=10116 Gene_Symbol=Itga1 Integrin alpha-1 precursor	774	805	R.VTLDFgNLTDPENGPVLDDALPNSVHEHIPFAK.D	0.00000400000000000000040000000000.0	779
IPI00324585	Tax_Id=10116 Gene_Symbol=Itga1 Integrin alpha-1 precursor	95	110	K.LDLPVgNTSIPNVTEIK.E	0.0000040000000000.0	100
IPI00324987	Tax_Id=10116 Gene_Symbol=P2rx4 P2X purinoceptor 4	181	190	K.AAEgNFTLLVK.N	0.0004000000.0	184
IPI00324987	Tax_Id=10116 Gene_Symbol=P2rx4 P2X purinoceptor 4	204	215	R.NILPgNITTSYLK.S	0.000040000000.0	208
IPI00324987	Tax_Id=10116 Gene_Symbol=P2rx4 P2X purinoceptor 4	70	82	K.GVAVTgNTSQLGFR.I	0.0000040000000.0	75
IPI00325312	Tax_Id=10116 Gene_Symbol=Prom1 prominin 1 isoform 1	259	269	K.DALQgNMSSSLK.S	0.00004100000.0	263
IPI00325312	Tax_Id=10116 Gene_Symbol=Prom1 prominin 1 isoform 1	273	286	R.DASTQLSTgNLTSVR.N	0.00000000400000.0	281
IPI00325312	Tax_Id=10116 Gene_Symbol=Prom1 prominin 1 isoform 1	540	552	K.NPDIgNMTFEQVYR.D	0.0000410000000.0	544
IPI00325312	Tax_Id=10116 Gene_Symbol=Prom1 prominin 1 isoform 1	708	732	K.VLASLDSAQHFLTSgNLSSIVIGETK.K	0.0000000000000040000000000.0	722
IPI00325847	Tax_Id=10116 Gene_Symbol=Cp GPI-anchored ceruloplasmin	129	144	K.ANEGAIYPDgNTTDFQR.A	0.0000000004000000.0	138
IPI00325860	Tax_Id=10116 Gene_Symbol=Podxl Podocalyxin precursor	271	290	K.LKCDPAIKPHEELLILgNLTR.D	0.00000000000000004000.0	287
IPI00325860	Tax_Id=10116 Gene_Symbol=Podxl Podocalyxin precursor	273	290	K.CDPAIKPHEELLILgNLTR.D	0.000000000000004000.0	287
IPI00325860	Tax_Id=10116 Gene_Symbol=Podxl Podocalyxin precursor	454	485	K.VVNLNGELGDSWIVPLDgNLTKEDLDEEEDTHL.-	0.00000000000000000400000000000000.0	471
IPI00326070	Tax_Id=10116 Gene_Symbol=Ctsl Cathepsin L1 precursor	213	233	K.YRAEYAVAgNDTGFVDIPQQEK.A	0.000000004000000000000.0	221
IPI00326070	Tax_Id=10116 Gene_Symbol=Ctsl Cathepsin L1 precursor	215	233	R.AEYAVAgNDTGFVDIPQQEK.A	0.0000004000000000000.0	221
IPI00326140	Tax_Id=10116 Gene_Symbol=Pzp Alpha-1-macroglobulin precursor	146	169	R.VVSVDISFRPVgNETFPVVYIENPK.R	0.000000000004000000000000.0	157
IPI00326140	Tax_Id=10116 Gene_Symbol=Pzp Alpha-1-macroglobulin precursor	146	169	R.VVSVDISFRPVgNETFPVVYIENPK.R	0.000000000004000000000400.0	157
IPI00326140	Tax_Id=10116 Gene_Symbol=Pzp Alpha-1-macroglobulin precursor	146	170	R.VVSVDISFRPVgNETFPVVYIENPKR.N	0.0000000000040000000000000.0	157
IPI00326140	Tax_Id=10116 Gene_Symbol=Pzp Alpha-1-macroglobulin precursor	375	391	K.GQPIPNKgNLTVQVNSVR.S	0.00000004000000000.0	382
IPI00326140	Tax_Id=10116 Gene_Symbol=Pzp Alpha-1-macroglobulin precursor	375	391	K.GQPIPNKgNLTVQVNSVR.S	0.00000004000004000.0	382
IPI00326140	Tax_Id=10116 Gene_Symbol=Pzp Alpha-1-macroglobulin precursor	375	391	K.GQPIPNKgNLTVQVNSVR.S	0.00000404000000000.0	382
IPI00326140	Tax_Id=10116 Gene_Symbol=Pzp Alpha-1-macroglobulin precursor	382	391	K.gNLTVQVNSVR.S	0.4000000000.0	382
IPI00326140	Tax_Id=10116 Gene_Symbol=Pzp Alpha-1-macroglobulin precursor	562	587	K.CFANTVgNLSFPSAQSLPASDTHLTVK.A	0.00000040000000000000000000.0	568
IPI00326140	Tax_Id=10116 Gene_Symbol=Pzp Alpha-1-macroglobulin precursor	562	587	K.CFANTVgNLSFPSAQSLPASDTHLTVK.A	0.00040040000000000000000000.0	568
IPI00326140	Tax_Id=10116 Gene_Symbol=Pzp Alpha-1-macroglobulin precursor	878	900	K.SLGEVgNFTATAEALQSPELCGNK.V	0.00000400000000000000000.0	883
IPI00326305	Tax_Id=10116 Gene_Symbol=Atp1a1 Sodium/potassium-transporting ATPase subunit alpha-1 precursor	205	227	R.IISANGCKVDgNSSLTGESEPQTR.S	0.00000000004000000000000.0	215
IPI00326305	Tax_Id=10116 Gene_Symbol=Atp1a1 Sodium/potassium-transporting ATPase subunit alpha-1 precursor	205	227	R.IISANGCKVDgNSSLTGESEPQTR.S	0.00004000004000000000000.0	215
IPI00326305	Tax_Id=10116 Gene_Symbol=Atp1a1 Sodium/potassium-transporting ATPase subunit alpha-1 precursor	213	227	K.VDgNSSLTGESEPQTR.S	0.004000000000000.0	215
IPI00326462	Tax_Id=10116 Gene_Symbol=Enpp3 Ectonucleotide pyrophosphatase/phosphodiesterase family member 3	593	605	R.LgNLSGGEVSATEK.T	0.0400000000000.0	594
IPI00326566	Tax_Id=10116 Gene_Symbol=Hdgf Hepatoma-derived growth factor	198	232	K.gNSTPSEPDSGQGPPPEEEEGEEEAAKEEAEAQGVR.D	0.40000000000000000000000000000000000.0	198
IPI00326948	Tax_Id=10116 Gene_Symbol=Hsd17b4 Hsd17b4 protein	685	696	K.gNGSGEVYQGPAK.G	0.400000000000.0	685
IPI00326990	Tax_Id=10116 Gene_Symbol=Slc15a2 Oligopeptide transporter, kidney isoform	537	552	K.DLgNISLDTDAPLSVGK.D	0.0040000000000000.0	539
IPI00326990	Tax_Id=10116 Gene_Symbol=Slc15a2 Oligopeptide transporter, kidney isoform	537	560	K.DLgNISLDTDAPLSVGKDYGVSAYR.T	0.004000000000000000000000.0	539
IPI00327143	Tax_Id=10116 Gene_Symbol=Alpl Alkaline phosphatase, tissue-nonspecific isozyme precursor	137	152	R.TRCgNTTQGNEVTSILR.W	0.0004000000000000.0	140
IPI00327143	Tax_Id=10116 Gene_Symbol=Alpl Alkaline phosphatase, tissue-nonspecific isozyme precursor	139	152	R.CgNTTQGNEVTSILR.W	0.04000000000000.0	140
IPI00327143	Tax_Id=10116 Gene_Symbol=Alpl Alkaline phosphatase, tissue-nonspecific isozyme precursor	230	241	K.gNRTDVEYELDEK.A	0.400000000000.0	230
IPI00327202	Tax_Id=10116 Gene_Symbol=Aqp1 Aquaporin-1	42	51	R.gNQTLVQDNVK.V	0.4000000000.0	42
IPI00327398	Tax_Id=10116 Gene_Symbol=Enpep Isoform 1 of Glutamyl aminopeptidase	232	243	K.KATYgNISLIHPK.E	0.000040000000.0	236
IPI00327398	Tax_Id=10116 Gene_Symbol=Enpep Isoform 1 of Glutamyl aminopeptidase	233	243	K.ATYgNISLIHPK.E	0.00040000000.0	236
IPI00327398	Tax_Id=10116 Gene_Symbol=Enpep Isoform 1 of Glutamyl aminopeptidase	309	319	K.QTAEYAAgNITK.A	0.00000004000.0	316
IPI00327398	Tax_Id=10116 Gene_Symbol=Enpep Isoform 1 of Glutamyl aminopeptidase	594	609	R.EGITLNAgNLSGDGFLK.I	0.0000000400000000.0	601
IPI00327398	Tax_Id=10116 Gene_Symbol=Enpep Isoform 1 of Glutamyl aminopeptidase	746	764	K.MGAGEALGgNASQLFEAWLK.G	0.1000000040000000000.0	754
IPI00327398	Tax_Id=10116 Gene_Symbol=Enpep Isoform 1 of Glutamyl aminopeptidase	765	774	K.GgNESIPVNLR.L	0.0400000000.0	766
IPI00327398	Tax_Id=10116 Gene_Symbol=Enpep Isoform 1 of Glutamyl aminopeptidase	780	800	R.YGMQNSGNEAAWgNYTLEQYQK.T	0.001000000000400000000.0	792
IPI00327469	Tax_Id=10116 Gene_Symbol=Ahsg Alpha-2-HS-glycoprotein precursor	155	165	R.FgNDTNVVHTVK.T	0.04000000000.0	156
IPI00327469	Tax_Id=10116 Gene_Symbol=Ahsg Alpha-2-HS-glycoprotein precursor	155	165	R.FgNDTNVVHTVK.T	0.04004000000.0	156
IPI00327469	Tax_Id=10116 Gene_Symbol=Ahsg Alpha-2-HS-glycoprotein precursor	166	181	K.TALAAFNAQNgNGTYFK.L	0.0000000000400000.0	176
IPI00327469	Tax_Id=10116 Gene_Symbol=Ahsg Alpha-2-HS-glycoprotein precursor	166	181	K.TALAAFNAQNgNGTYFK.L	0.0000000004400000.0	176
IPI00327469	Tax_Id=10116 Gene_Symbol=Ahsg Alpha-2-HS-glycoprotein precursor	166	181	K.TALAAFNAQNgNGTYFK.L	0.0000004000400000.0	176
IPI00327469	Tax_Id=10116 Gene_Symbol=Ahsg Alpha-2-HS-glycoprotein precursor	72	103	R.RPFGEVYELEIDTLETTCHALDPTPLAgNCSVR.Q	0.00000000000000000000000000040000.0	99
IPI00327697	Tax_Id=10116 Gene_Symbol=Dpep1 Dipeptidase 1 precursor	331	339	R.RgNWTETEVR.G	0.040000000.0	332
IPI00327697	Tax_Id=10116 Gene_Symbol=Dpep1 Dipeptidase 1 precursor	53	70	R.KSEAgNLSALAETHTNIPK.L	0.000040000000000000.0	57
IPI00327697	Tax_Id=10116 Gene_Symbol=Dpep1 Dipeptidase 1 precursor	54	70	K.SEAgNLSALAETHTNIPK.L	0.00040000000000000.0	57
IPI00327953	Tax_Id=10116 Gene_Symbol=Slc6a6 Sodium- and chloride-dependent taurine transporter	276	284	K.FYLYPgNISR.L	0.000004000.0	281
IPI00332022	Tax_Id=10116 Gene_Symbol=Igf2r Mannose 6-phosphate/insulin-like growth factor II receptor	102	118	K.SLLEFgNTTTGCQPSEHR.I	0.00000400000000000.0	107
IPI00332022	Tax_Id=10116 Gene_Symbol=Igf2r Mannose 6-phosphate/insulin-like growth factor II receptor	2113	2136	R.AACAVRPQEVNMVgNGTLTNPVTGK.S	0.000000000001040000000000.0	2126
IPI00332022	Tax_Id=10116 Gene_Symbol=Igf2r Mannose 6-phosphate/insulin-like growth factor II receptor	571	591	K.ITTgNITFVCKPGDLESAPVLR.A	0.000400000000000000000.0	574
IPI00339118	Tax_Id=10116 Gene_Symbol=Enpp1 Isoform 2 of Ectonucleotide pyrophosphatase/phosphodiesterase family member 1	266	273	K.MgNASFSLK.S	0.14000000.0	267
IPI00339118	Tax_Id=10116 Gene_Symbol=Enpp1 Isoform 2 of Ectonucleotide pyrophosphatase/phosphodiesterase family member 1	321	331	K.VYgNGSVPFEER.I	0.00400000000.0	323
IPI00339124	Tax_Id=10116 Gene_Symbol=Atp1b1 Sodium/potassium-transporting ATPase subunit beta-1	151	170	R.FKLDWLGgNCSGLNDESYGYK.E	0.00000004000000000000.0	158
IPI00339124	Tax_Id=10116 Gene_Symbol=Atp1b1 Sodium/potassium-transporting ATPase subunit beta-1	151	170	R.FKLDWLGgNCSGLNDESYGYK.E	0.00000004000040000000.0	158
IPI00339124	Tax_Id=10116 Gene_Symbol=Atp1b1 Sodium/potassium-transporting ATPase subunit beta-1	153	170	K.LDWLGgNCSGLNDESYGYK.E	0.000004000000000000.0	158
IPI00339124	Tax_Id=10116 Gene_Symbol=Atp1b1 Sodium/potassium-transporting ATPase subunit beta-1	257	276	K.YLQPLLAVQFTgNLTLDTEIR.I	0.00000000000400000000.0	268
IPI00339148	Tax_Id=10116 Gene_Symbol=Hspd1 60 kDa heat shock protein, mitochondrial precursor	97	121	K.LVQDVAgNNTNEEAGDGTTTATVLAR.S	0.0000004000000000000000000.0	103
IPI00358014	Tax_Id=10116 Gene_Symbol=Btd Biotinidase precursor	127	135	R.FgNDTEVLQR.L	0.040000000.0	128
IPI00358014	Tax_Id=10116 Gene_Symbol=Btd Biotinidase precursor	315	337	R.VATNPQGLVGTEgNTTSEMDPSHR.K	0.00000000000040000100000.0	327
IPI00358014	Tax_Id=10116 Gene_Symbol=Btd Biotinidase precursor	315	338	R.VATNPQGLVGTEgNTTSEMDPSHRK.F	0.000000000000400001000000.0	327
IPI00358043	Tax_Id=10116 Gene_Symbol=Mmrn2_predicted multimerin 2	828	847	K.FgNATSVNVGSGYFPEHGYFR.A	0.04000000000000000000.0	829
IPI00358387	Tax_Id=10116 Gene_Symbol=Sumf1_predicted sulfatase modifying factor 1	137	149	K.FVgNSTGYLTEAEK.F	0.0040000000000.0	139
IPI00358780	Tax_Id=10116 Gene_Symbol=Tek 119 kDa protein	524	539	K.VPGgNLTSVLLNNLLPR.E	0.0004000000000000.0	527
IPI00359123	Tax_Id=10116 Gene_Symbol=RGD1310427_predicted hypothetical protein LOC362643	912	921	R.FINYgNQTVSR.M	0.0000400000.0	916
IPI00359436	Tax_Id=10116 Gene_Symbol=RGD1308358_predicted hypothetical protein LOC291952	475	482	K.LgNLTEGEK.L	0.04000000.0	476
IPI00359847	Tax_Id=10116 Gene_Symbol=Galns N-acetylgalactosamine-6-sulfatase precursor	201	219	K.TGEAgNLTQLYLQEALDFIR.T	0.0000400000000000000.0	205
IPI00360085	Tax_Id=10116 Gene_Symbol=Pign_predicted Phosphatidylinositol glycan class N	115	131	K.GWKENPVEFDSLFgNESK.Y	0.00000000000004000.0	128
IPI00360085	Tax_Id=10116 Gene_Symbol=Pign_predicted Phosphatidylinositol glycan class N	118	131	K.ENPVEFDSLFgNESK.Y	0.00000000004000.0	128
IPI00360356	Tax_Id=10116 Gene_Symbol=RGD1309504_predicted hypothetical protein LOC294732	198	207	R.GYgNFTTTAER.E	0.0040000000.0	200
IPI00360356	Tax_Id=10116 Gene_Symbol=RGD1309504_predicted hypothetical protein LOC294732	2	19	M.VDDELGALVVDgNGSGMCK.A	0.000000000004000000.0	13
IPI00361106	Tax_Id=10116 Gene_Symbol=RGD1560062_predicted hypothetical protein LOC309816	304	316	R.HVTDMgNSTIHLLK.T	0.0000140000000.0	309
IPI00361106	Tax_Id=10116 Gene_Symbol=RGD1560062_predicted hypothetical protein LOC309816	778	789	R.DAVRgNLTEVVPR.L	0.000040000000.0	782
IPI00361106	Tax_Id=10116 Gene_Symbol=RGD1560062_predicted hypothetical protein LOC309816	782	789	R.gNLTEVVPR.L	0.40000000.0	782
IPI00361106	Tax_Id=10116 Gene_Symbol=RGD1560062_predicted hypothetical protein LOC309816	801	812	K.RPASgNVSASIQR.V	0.000040000000.0	805
IPI00361301	Tax_Id=10116 Gene_Symbol=Lama2_predicted similar to Laminin alpha-2 chain precursor	1607	1619	K.ILYGLEgNATQELK.H	0.0000004000000.0	1613
IPI00361686	Tax_Id=10116 Gene_Symbol=C1qbp Complement component 1 Q subcomponent-binding protein, mitochondrial precursor	103	117	K.MSGDWELEVgNGTEAK.L	0.100000000400000.0	112
IPI00362131	Tax_Id=10116 Gene_Symbol=Cdh2 Cadherin-2 precursor	691	697	K.SgNISILR.V	0.0400000.0	692
IPI00362160	Tax_Id=10116 Gene_Symbol=Tubb3 Tubulin beta-3 chain	337	350	K.gNSSYFVEWIPNNVK.V	0.40000000000000.0	337
IPI00362369	Tax_Id=10116 Gene_Symbol=RGD1306248 similar to RIKEN cDNA 9630046K23	430	437	K.FLSYgNVTR.R	0.00004000.0	434
IPI00362963	Tax_Id=10116 Gene_Symbol=RGD1310224 Similar to RIKEN cDNA 1810022C23	88	113	K.gNASTDNSVITVFTGVGDYYSSGNDLR.N	0.40000000000000000000000000.0	88
IPI00363534	Tax_Id=10116 Gene_Symbol=Lama1 laminin, alpha 1	1343	1352	R.IAgNISMEVGR.K	0.0040010000.0	1345
IPI00363534	Tax_Id=10116 Gene_Symbol=Lama1 laminin, alpha 1	1725	1732	R.QgNATLELK.A	0.04000000.0	1726
IPI00363534	Tax_Id=10116 Gene_Symbol=Lama1 laminin, alpha 1	1805	1816	K.LHVQEEQgNLTSK.L	0.000000040000.0	1812
IPI00363534	Tax_Id=10116 Gene_Symbol=Lama1 laminin, alpha 1	1934	1948	K.TAgNKTSLISESLAPR.G	0.004000000000000.0	1936
IPI00363534	Tax_Id=10116 Gene_Symbol=Lama1 laminin, alpha 1	1977	1990	K.LDELKgNLTSQFQER.V	0.00000400000000.0	1982
IPI00363534	Tax_Id=10116 Gene_Symbol=Lama1 laminin, alpha 1	2021	2032	K.ELAVAAgNETAAR.T	0.000000400000.0	2027
IPI00363534	Tax_Id=10116 Gene_Symbol=Lama1 laminin, alpha 1	2044	2053	R.VFgNTSEDLSR.V	0.0040000000.0	2046
IPI00363534	Tax_Id=10116 Gene_Symbol=Lama1 laminin, alpha 1	2526	2537	K.gNSSGVILAALGK.D	0.400000000000.0	2526
IPI00363534	Tax_Id=10116 Gene_Symbol=Lama1 laminin, alpha 1	2624	2639	R.TIgNISNLYIGGLPEGK.G	0.0040000000000000.0	2626
IPI00363534	Tax_Id=10116 Gene_Symbol=Lama1 laminin, alpha 1	559	570	R.QISIgNNTAVMHR.F	0.000040000100.0	563
IPI00363550	Tax_Id=10116 Gene_Symbol=Tfrc similar to transferrin receptor	723	733	K.NITAFgNETLFR.N	0.00000400000.0	728
IPI00363849	Tax_Id=10116 Gene_Symbol=Lamc1 similar to Laminin gamma-1 chain precursor	1104	1114	R.VgNNSLHSQISR.L	0.04000000000.0	1105
IPI00363849	Tax_Id=10116 Gene_Symbol=Lamc1 similar to Laminin gamma-1 chain precursor	1201	1215	K.TAgNETSAEAYNLLLR.T	0.004000000000000.0	1203
IPI00363849	Tax_Id=10116 Gene_Symbol=Lamc1 similar to Laminin gamma-1 chain precursor	1216	1232	R.TLAGEgNQTALEIEELNR.K	0.00000400000000000.0	1221
IPI00363849	Tax_Id=10116 Gene_Symbol=Lamc1 similar to Laminin gamma-1 chain precursor	1233	1246	R.KYEQAKgNISQDLEK.Q	0.00000040000000.0	1239
IPI00363849	Tax_Id=10116 Gene_Symbol=Lamc1 similar to Laminin gamma-1 chain precursor	1374	1387	R.RVNDgNKTAAEEALR.R	0.00004000000000.0	1378
IPI00363849	Tax_Id=10116 Gene_Symbol=Lamc1 similar to Laminin gamma-1 chain precursor	1375	1387	R.VNDgNKTAAEEALR.R	0.0004000000000.0	1378
IPI00363849	Tax_Id=10116 Gene_Symbol=Lamc1 similar to Laminin gamma-1 chain precursor	645	653	K.LLNgNLTSIK.I	0.000400000.0	648
IPI00363849	Tax_Id=10116 Gene_Symbol=Lamc1 similar to Laminin gamma-1 chain precursor	645	653	K.LLNgNLTSIK.I	0.004400000.0	648
IPI00363901	Tax_Id=10116 Gene_Symbol=Igj Immunoglobulin joining chain	69	79	R.EgNISDPTSPVR.T	0.04000000000.0	70
IPI00364124	Tax_Id=10116 Gene_Symbol=Lrpap1 Alpha-2-macroglobulin receptor-associated protein precursor	260	275	R.VIDLWDLAQSAgNFTEK.E	0.0000000000040000.0	271
IPI00364439	Tax_Id=10116 Gene_Symbol=RGD1559682_predicted similar to Peptidyl-prolyl cis-trans isomerase A	2	19	M.VNLTMFFgNITADGEPLGR.V	0.000010040000000000.0	9
IPI00364439	Tax_Id=10116 Gene_Symbol=RGD1559682_predicted similar to Peptidyl-prolyl cis-trans isomerase A	92	118	K.HTGPGILSMANAGPNTgNGSQFFICTAK.T	0.000000000000000040000000000.0	108
IPI00364439	Tax_Id=10116 Gene_Symbol=RGD1559682_predicted similar to Peptidyl-prolyl cis-trans isomerase A	92	118	K.HTGPGILSMANAGPNTgNGSQFFICTAK.T	0.000000001000000040000000000.0	108
IPI00364439	Tax_Id=10116 Gene_Symbol=RGD1559682_predicted similar to Peptidyl-prolyl cis-trans isomerase A	92	118	K.HTGPGILSMANAGPNTgNGSQFFICTAK.T	0.000000001000004040000000000.0	108
IPI00364925	Tax_Id=10116 Gene_Symbol=Dhtkd1 Probable 2-oxoglutarate dehydrogenase E1 component DHKTD1, mitochondrial precursor	303	324	R.GRQQSQEDGDYSPgNGSAQPGDK.V	0.0000000000000400000000.0	316
IPI00364925	Tax_Id=10116 Gene_Symbol=Dhtkd1 Probable 2-oxoglutarate dehydrogenase E1 component DHKTD1, mitochondrial precursor	305	324	R.QQSQEDGDYSPgNGSAQPGDK.V	0.00000000000400000000.0	316
IPI00364925	Tax_Id=10116 Gene_Symbol=Dhtkd1 Probable 2-oxoglutarate dehydrogenase E1 component DHKTD1, mitochondrial precursor	565	590	K.gNGTNLDWATAETLALGSLLAQGFNVR.L	0.40000000000000000000000000.0	565
IPI00365542	Tax_Id=10116 Gene_Symbol=Lamb1_predicted laminin, beta 1	1326	1345	R.SgNSTAGELDALQAEAGSLDK.T	0.04000000000000000000.0	1327
IPI00365542	Tax_Id=10116 Gene_Symbol=Lamb1_predicted laminin, beta 1	1383	1401	R.VgNASTTDPNSTVEQSALTR.D	0.0400000000000000000.0	1384
IPI00365542	Tax_Id=10116 Gene_Symbol=Lamb1_predicted laminin, beta 1	1579	1596	K.MEMPSTPQQLQgNLTEDIR.E	0.101000000004000000.0	1590
IPI00365545	Tax_Id=10116 Gene_Symbol=Dld Dihydrolipoyl dehydrogenase, mitochondrial precursor	73	89	K.gNETLGGTCLNVGCIPSK.A	0.40000000000000000.0	73
IPI00365669	Tax_Id=10116 Gene_Symbol=M6pr Cation-dependent mannose-6-phosphate receptor precursor	81	96	R.EAGgNHSSGAGLVQINK.S	0.0004000000000000.0	84
IPI00365784	Tax_Id=10116 Gene_Symbol=LOC306805 Similar to asporin	272	285	K.ITDIEgNGTFANIPR.V	0.00000400000000.0	277
IPI00365922	Tax_Id=10116 Gene_Symbol=LOC362795 LOC362795 protein	307	324	R.VFTAQTQPHEEQLgNGTFR.V	0.000000000000040000.0	320
IPI00365985	Tax_Id=10116 Gene_Symbol=Tra1_predicted 93 kDa protein	44	67	R.TDDEVVQREEEAIQLDGLgNASQIR.E	0.000000000000000000400000.0	62
IPI00366226	Tax_Id=10116 Gene_Symbol=Gns Glucosamine (N-acetyl)-6-sulfatase	173	183	K.YYgNYTLSINGK.A	0.00400000000.0	175
IPI00366226	Tax_Id=10116 Gene_Symbol=Gns Glucosamine (N-acetyl)-6-sulfatase	173	183	K.YYgNYTLSINGK.A	0.00400000400.0	175
IPI00366226	Tax_Id=10116 Gene_Symbol=Gns Glucosamine (N-acetyl)-6-sulfatase	359	393	K.MLVSNIDLGPTILDLAGYDLgNKTQMDGTSLLPILK.G	0.10000000000000000000400010000000000.0	379
IPI00366226	Tax_Id=10116 Gene_Symbol=Gns Glucosamine (N-acetyl)-6-sulfatase	359	393	K.MLVSNIDLGPTILDLAGYDLgNKTQMDGTSLLPILK.G	0.10004000000000000000400010000000000.0	379
IPI00366226	Tax_Id=10116 Gene_Symbol=Gns Glucosamine (N-acetyl)-6-sulfatase	394	401	K.GDGgNLTWR.S	0.00040000.0	397
IPI00366496	Tax_Id=10116 Gene_Symbol=Slc44a2_predicted similar to CTL2 gene	407	419	K.TCNPETFPLgNESR.Q	0.0000000004000.0	416
IPI00366665	Tax_Id=10116 Gene_Symbol=Car12 Membrane-bound carbonic anhydrase 12	86	97	K.LLgNLTNDGHSVR.L	0.004000000000.0	88
IPI00366665	Tax_Id=10116 Gene_Symbol=Car12 Membrane-bound carbonic anhydrase 12	86	97	K.LLgNLTNDGHSVR.L	0.004004000000.0	88
IPI00367013	Tax_Id=10116 Gene_Symbol=RGD1304696 Thioredoxin domain-containing protein 15 precursor	274	285	K.IFIFgNQTGIEAK.K	0.000040000000.0	278
IPI00368704	Tax_Id=10116 Gene_Symbol=RGD1566313_predicted similar to Murinoglobulin 1 homolog	1000	1010	K.YLgNETQQLTEK.I	0.00400000000.0	1002
IPI00368704	Tax_Id=10116 Gene_Symbol=RGD1566313_predicted similar to Murinoglobulin 1 homolog	386	404	K.AQGAGFTgNATTTDQHGLAK.F	0.0000000400000000000.0	393
IPI00368874	Tax_Id=10116 Gene_Symbol=LOC299458 LOC299458 protein	240	264	K.NKDLHVPIPAVVEMNPgNVSVFIPPR.D	0.0000000000000100400000000.0	256
IPI00368874	Tax_Id=10116 Gene_Symbol=LOC299458 LOC299458 protein	242	264	K.DLHVPIPAVVEMNPgNVSVFIPPR.D	0.00000000000100400000000.0	256
IPI00369140	Tax_Id=10116 Gene_Symbol=RGD1309019_predicted 38 kDa protein	162	180	K.DAFTgNVSSPDAGATLPNDK.A	0.0000400000000000000.0	166
IPI00369174	Tax_Id=10116 Gene_Symbol=Rnf126 Ring finger protein 126	46	62	R.NTEgNGSAPSTAPTDQNR.Q	0.00040000000000000.0	49
IPI00369465	Tax_Id=10116 Gene_Symbol=Ncln Nicalin precursor	428	435	R.VIYgNLTEK.G	0.00040000.0	431
IPI00369539	Tax_Id=10116 Gene_Symbol=Mfap4 Microfibrillar-associated protein 4	133	146	R.VDLEDFEgNNTAYAK.Y	0.00000004000000.0	140
IPI00369539	Tax_Id=10116 Gene_Symbol=Mfap4 Microfibrillar-associated protein 4	89	97	R.FgNGSVSFFR.G	0.040000000.0	90
IPI00369591	Tax_Id=10116 Gene_Symbol=Pvrl1 similar to poliovirus receptor-related 1	200	210	R.NPgNGTVTVISR.Y	0.00400000000.0	202
IPI00369729	Tax_Id=10116 Gene_Symbol=Kdelc2 KDEL motif-containing protein 2 precursor	289	311	R.GVTNDLLSVQGNTGPSWIgNKTEK.A	0.00000000000000000040000.0	307
IPI00369937	Tax_Id=10116 Gene_Symbol=Pigs GPI transamidase component PIG-S	368	377	K.IYgNASELPVR.V	0.0040000000.0	370
IPI00369995	Tax_Id=10116 Gene_Symbol=Lrp1 similar to low density lipoprotein receptor-related protein 1	1508	1518	K.WTGHgNVTVVQR.T	0.00004000000.0	1512
IPI00369995	Tax_Id=10116 Gene_Symbol=Lrp1 similar to low density lipoprotein receptor-related protein 1	3949	3959	R.GVTHLgNISGLK.M	0.00000400000.0	3954
IPI00369995	Tax_Id=10116 Gene_Symbol=Lrp1 similar to low density lipoprotein receptor-related protein 1	4075	4087	R.LgNGTDPIVAVDSK.R	0.0400000000000.0	4076
IPI00370427	Tax_Id=10116 Gene_Symbol=Tinag Tubulointerstitial nephritis antigen	356	365	R.ISSgNETEIMR.E	0.0004000000.0	359
IPI00370427	Tax_Id=10116 Gene_Symbol=Tinag Tubulointerstitial nephritis antigen	356	365	R.ISSgNETEIMR.E	0.0004000010.0	359
IPI00370427	Tax_Id=10116 Gene_Symbol=Tinag Tubulointerstitial nephritis antigen	452	460	R.GVgNESDIEK.L	0.004000000.0	454
IPI00370450	Tax_Id=10116 Gene_Symbol=Plxnb2 plexin B2	1056	1082	K.VVFLSPAVPEEPEAYgNLTALIQMDGHR.A	0.000000000000000400000010000.0	1071
IPI00370450	Tax_Id=10116 Gene_Symbol=Plxnb2 plexin B2	1087	1108	R.TEAGAFEYVADPTFEgNFTGGVK.K	0.0000000000000004000000.0	1102
IPI00370450	Tax_Id=10116 Gene_Symbol=Plxnb2 plexin B2	1087	1109	R.TEAGAFEYVADPTFEgNFTGGVKK.Q	0.00000000000000040000000.0	1102
IPI00370450	Tax_Id=10116 Gene_Symbol=Plxnb2 plexin B2	442	462	K.IKGDLALSGgNLSNLYAMTQDK.V	0.000000000400000010000.0	451
IPI00370450	Tax_Id=10116 Gene_Symbol=Plxnb2 plexin B2	730	745	K.LSHDAgNETLPLHLYVK.S	0.0000040000000000.0	735
IPI00370596	Tax_Id=10116 Gene_Symbol=RGD1562373_predicted 3-ketoacyl-CoA thiolase B, peroxisomal precursor	266	289	K.DGGSTTAGgNSSQVSDGAAAVLLAR.R	0.000000004000000000000000.0	274
IPI00371511	Tax_Id=10116 Gene_Symbol=Creg_predicted cellular repressor of E1A-stimulated genes	159	168	K.VgNETEEGYAR.D	0.0400000000.0	160
IPI00371736	Tax_Id=10116 Gene_Symbol=LOC685174 similar to trinucleotide repeat containing 5	227	247	K.VVMDIPYELWgNETSAEVADLK.K	0.001000000040000000000.0	237
IPI00371853	Tax_Id=10116 Gene_Symbol=Col6a1_predicted similar to Collagen alpha-1(VI) chain precursor	210	221	R.RgNFTAADWGHSR.D	0.040000000000.0	211
IPI00372145	Tax_Id=10116 Gene_Symbol=RGD1561496_predicted similar to Putative alpha-mannosidase C1orf22	310	324	K.LLPAFgNTTSGLPYPR.I	0.000004000000000.0	315
IPI00372372	Tax_Id=10116 Gene_Symbol=Serpinc1 Serine (Or cysteine) peptidase inhibitor, clade C (Antithrombin), member 1	125	133	K.LGACgNNTLK.Q	0.000040000.0	129
IPI00372372	Tax_Id=10116 Gene_Symbol=Serpinc1 Serine (Or cysteine) peptidase inhibitor, clade C (Antithrombin), member 1	217	230	R.VTINNWVAgNKTEGR.I	0.00000000400000.0	225
IPI00372786	Tax_Id=10116 Gene_Symbol=Nid2 similar to nidogen 2 isoform 2	700	712	R.SFSLISGSIgNQTR.S	0.0000000004000.0	709
IPI00372786	Tax_Id=10116 Gene_Symbol=Nid2 similar to nidogen 2 isoform 2	716	723	R.IDQgNITYK.A	0.00040000.0	719
IPI00372804	Tax_Id=10116 Gene_Symbol=Sccpdh Probable saccharopine dehydrogenase	112	136	K.ACIEgNGTSCIDICGEPQFLELMHVK.Y	0.0000400000000000000000000.0	116
IPI00372839	Tax_Id=10116 Gene_Symbol=Col6a2 similar to procollagen, type VI, alpha 2	139	154	R.GTFTDCALAgNMTQQIR.Q	0.0000000004100000.0	148
IPI00372839	Tax_Id=10116 Gene_Symbol=Col6a2 similar to procollagen, type VI, alpha 2	793	804	R.gNMTLFSDLVAEK.F	0.410000000000.0	793
IPI00373230	Tax_Id=10116 Gene_Symbol=Muc1 similar to mucin 1, transmembrane	469	482	R.NHPFgNSSLEDPSSR.Y	0.00004000000000.0	473
IPI00373395	Tax_Id=10116 Gene_Symbol=C8g_predicted 22 kDa protein	171	184	R.GAgNLTEDQIFFFPK.Y	0.00400000000000.0	173
IPI00373408	Tax_Id=10116 Gene_Symbol=Sort1 Sortilin precursor	154	165	K.DITNLIgNNTFIR.T	0.000000400000.0	160
IPI00373752	Tax_Id=10116 Gene_Symbol=Flnb_predicted filamin, beta	2245	2265	K.gNGSCGVSYIAQEPGNYEVSIK.F	0.400000000000000000000.0	2245
IPI00382223	Tax_Id=10116 Gene_Symbol=RGD1308874 Ab2-305	141	154	R.VGPgNGTLFVVDAYK.G	0.00040000000000.0	144
IPI00388036	Tax_Id=10116 Gene_Symbol=ORF19 similar to CXYorf1-related protein	26	50	R.REEAIQQVADALQYLQgNISGDIFSR.I	0.0000000000000000400000000.0	42
IPI00388265	Tax_Id=10116 Gene_Symbol=Pgcp 48 kDa protein	375	387	K.EVMSLLQPLgNITK.V	0.0000000004000.0	384
IPI00388265	Tax_Id=10116 Gene_Symbol=Pgcp 48 kDa protein	375	387	K.EVMSLLQPLgNITK.V	0.0010000004000.0	384
IPI00388323	Tax_Id=10116 Gene_Symbol=Hspg2 396 kDa protein	3062	3083	R.SLTQGSMIVGNLAPVgNGTSQGK.F	0.0000001000000004000000.0	3077
IPI00388323	Tax_Id=10116 Gene_Symbol=Hspg2 396 kDa protein	3338	3369	K.SQGLNLHTLLYLGGVEPSVQLSPATgNMSAHFR.G	0.00000000000000000000000004100000.0	3363
IPI00388323	Tax_Id=10116 Gene_Symbol=Hspg2 396 kDa protein	530	565	K.GVgNVTMPSQPGVPPLSSTQLQIDPTLQEFQLVDLSR.R	0.004001000000000000000000000000000000.0	532
IPI00388323	Tax_Id=10116 Gene_Symbol=Hspg2 396 kDa protein	65	71	R.ALVgNFTR.S	0.0004000.0	68
IPI00388355	Tax_Id=10116 Gene_Symbol=Manba Isoform 1 of Beta-mannosidase precursor	98	118	K.LIFDGVDTVAEILFNgNVTIGK.T	0.000000000000000400000.0	113
IPI00392474	Tax_Id=10116 Gene_Symbol=Slc39a8 Zinc transporter ZIP8	36	50	R.VFGAgNQSLSAAQLGR.L	0.000040000000000.0	40
IPI00392894	Tax_Id=10116 Gene_Symbol=Mgam_predicted 89 kDa protein	31	47	K.MESDLAgNTTAGFTAALK.N	0.10000040000000000.0	37
IPI00392894	Tax_Id=10116 Gene_Symbol=Mgam_predicted 89 kDa protein	367	380	K.VWVgNSSDGNALIGK.V	0.00040000000000.0	370
IPI00392894	Tax_Id=10116 Gene_Symbol=Mgam_predicted 89 kDa protein	584	601	K.DQDPASFGEDSLLLgNSSR.H	0.000000000000004000.0	598
IPI00393441	Tax_Id=10116 Gene_Symbol=RT1-CE2 MHC class I protein	275	294	K.EQgNYTCLVEHEGLPEPLSQR.W	0.00400000000000000000.0	277
IPI00394353	Tax_Id=10116 Gene_Symbol=Hexa Beta-hexosaminidase alpha chain precursor	483	497	R.LWSSgNLTTNMDFAFK.R	0.000040000100000.0	487
IPI00395285	Tax_Id=10116 Gene_Symbol=Rpl3 60S ribosomal protein L3	301	312	K.NgNASTDYDLSDK.S	0.040000000000.0	302
IPI00400573	Tax_Id=10116 Gene_Symbol=Tubb2c Tubulin beta-2C chain	337	350	K.gNSSYFVEWIPNNVK.T	0.40000000000000.0	337
IPI00400579	Tax_Id=10116 Gene_Symbol=Gaa Lysosomal alpha-glucosidase precursor	138	154	R.LEgNLSSTESGYTATLTR.T	0.00400000000000000.0	140
IPI00400579	Tax_Id=10116 Gene_Symbol=Gaa Lysosomal alpha-glucosidase precursor	465	479	R.GVFITgNETGQPLIGK.V	0.000004000000000.0	470
IPI00400738	Tax_Id=10116 Gene_Symbol=Galnt11 Polypeptide N-acetylgalactosaminyltransferase 11	425	432	K.SFGgNISER.V	0.00040000.0	428
IPI00400739	Tax_Id=10116 Gene_Symbol=Entpd5 Ectonucleoside triphosphate diphosphohydrolase 5	222	235	K.GYLASFEMFgNSTFK.L	0.00000001040000.0	231
IPI00400747	Tax_Id=10116 Gene_Symbol=Man2b1 Mannosidase 2, alpha B1	366	373	K.AgNLTWTVK.E	0.04000000.0	367
IPI00400747	Tax_Id=10116 Gene_Symbol=Man2b1 Mannosidase 2, alpha B1	495	511	R.EIgNISICPASQTSEHFR.V	0.00400000000000000.0	497
IPI00400747	Tax_Id=10116 Gene_Symbol=Man2b1 Mannosidase 2, alpha B1	625	638	R.KIENLEQgNISLPVR.Q	0.00000004000000.0	632
IPI00409514	Tax_Id=10116 Gene_Symbol=Pgap1 GPI inositol-deacylase	551	566	K.LHVAQPEgNDSHVALLK.M	0.0000000400000000.0	558
IPI00409539	Tax_Id=10116 Gene_Symbol=Flna_predicted similar to Filamin-A	725	738	K.DNGgNGTYSCSYVPR.K	0.00040000000000.0	728
IPI00421319	Tax_Id=10116 Gene_Symbol=Tmem106b LRRGT00101	290	302	R.LSgNITNIGPLDMK.Q	0.0040000000010.0	292
IPI00421539	Tax_Id=10116 Gene_Symbol=Aco2 Aconitate hydratase, mitochondrial precursor	379	395	R.VGLIGSCTgNSSYEDMGR.S	0.00000000400000100.0	387
IPI00421601	Tax_Id=10116 Gene_Symbol=Asah1 N-acylsphingosine amidohydrolase 1	254	266	R.SVLEgNSTSYEEAK.N	0.0000400000000.0	258
IPI00421601	Tax_Id=10116 Gene_Symbol=Asah1 N-acylsphingosine amidohydrolase 1	274	295	K.ITAPAYFILGGgNQSGEGCVITR.E	0.0000000000040000000000.0	285
IPI00421610	Tax_Id=10116 Gene_Symbol=Harpb64 Isoamyl acetate-hydrolyzing esterase 1 homolog	72	99	R.KGAGLENPVAVTIFFGAgNDSTLKDENPK.Q	0.0000000000000000040000000000.0	89
IPI00421610	Tax_Id=10116 Gene_Symbol=Harpb64 Isoamyl acetate-hydrolyzing esterase 1 homolog	73	99	K.GAGLENPVAVTIFFGAgNDSTLKDENPK.Q	0.000000000000000040000000000.0	89
IPI00421874	Tax_Id=10116 Gene_Symbol=Vdac1 Voltage-dependent anion-selective channel protein 1	237	256	K.VNgNSSLIGLGYTQTLKPGIK.L	0.00400000000000000000.0	239
IPI00421874	Tax_Id=10116 Gene_Symbol=Vdac1 Voltage-dependent anion-selective channel protein 1	33	61	K.TKSENGLEFTSSGSANTETTKVgNGSLETK.Y	0.00004000000000000000004000000.0	55
IPI00422076	Tax_Id=10116 Gene_Symbol=Thbs1 Thrombospondin 1	1065	1077	K.VVgNSTTGPGEHLR.N	0.0040000000000.0	1067
IPI00454453	Tax_Id=10116 Gene_Symbol=Sgce Epsilon-sarcoglycan	196	207	R.LNAIgNITSALDR.G	0.000040000000.0	200
IPI00454558	Tax_Id=10116 Gene_Symbol=Enpp5 Ectonucleotide pyrophosphatase/phosphodiesterase family member 5 precursor	279	297	K.FNEVYDALANAHPgNLTVYK.K	0.0000000000000400000.0	292
IPI00454558	Tax_Id=10116 Gene_Symbol=Enpp5 Ectonucleotide pyrophosphatase/phosphodiesterase family member 5 precursor	279	298	K.FNEVYDALANAHPgNLTVYKK.E	0.00000000000004000000.0	292
IPI00464518	Tax_Id=10116 Gene_Symbol=Hexb Beta-hexosaminidase beta chain precursor	298	317	K.VGPVDPSLgNTTYVFFDTFFK.E	0.00000000400000000000.0	306
IPI00464765	Tax_Id=10116 Gene_Symbol=Igsf4a Immunoglobulin superfamily, member 4A	100	111	R.FQLLgNFSSSELK.V	0.000040000000.0	104
IPI00464785	Tax_Id=10116 Gene_Symbol=Ppgb Protective protein for beta-galactosidase	136	153	K.MYVTgNDTEVAENNYQALK.D	0.000040000000000000.0	140
IPI00464785	Tax_Id=10116 Gene_Symbol=Ppgb Protective protein for beta-galactosidase	136	153	K.MYVTgNDTEVAENNYQALK.D	0.100040000000000000.0	140
IPI00464785	Tax_Id=10116 Gene_Symbol=Ppgb Protective protein for beta-galactosidase	136	153	K.MYVTgNDTEVAENNYQALK.D	0.100040000000400000.0	140
IPI00464785	Tax_Id=10116 Gene_Symbol=Ppgb Protective protein for beta-galactosidase	136	153	K.MYVTgNDTEVAENNYQALK.D	0.100040000004000000.0	140
IPI00464785	Tax_Id=10116 Gene_Symbol=Ppgb Protective protein for beta-galactosidase	320	342	K.VRLDPPCTgNTTAPSTYLNNPYVR.K	0.00000000400000000000000.0	328
IPI00464785	Tax_Id=10116 Gene_Symbol=Ppgb Protective protein for beta-galactosidase	322	342	R.LDPPCTgNTTAPSTYLNNPYVR.K	0.000000400000000000000.0	328
IPI00464886	Tax_Id=10116 Gene_Symbol=LOC652956 p55 protein	54	68	R.TgNGSVDLGEEEEAAR.G	0.040000000000000.0	55
IPI00470238	Tax_Id=10116 Gene_Symbol=Cd47 Isoform 2 of Leukocyte surface antigen CD47 precursor	94	119	K.GIASLTMDTHEAVVGgNYTCEVTELSR.E	0.00000010000000040000000000.0	109
IPI00470260	Tax_Id=10116 Gene_Symbol=Gm2a GM2 ganglioside activator protein	148	175	K.EGTYSLPSSgNFTVPDLELPSWLSTGNYR.I	0.0000000004000000000000000000.0	157
IPI00471666	Tax_Id=10116 Gene_Symbol=MGC94145 Uncharacterized protein C1orf179 homolog	183	204	K.GPNVPISTEVgNATQFLALVQEK.Y	0.0000000000400000000000.0	193
IPI00471666	Tax_Id=10116 Gene_Symbol=MGC94145 Uncharacterized protein C1orf179 homolog	315	322	K.QLALgNTTR.K	0.00004000.0	319
IPI00471757	Tax_Id=10116 Gene_Symbol=Naga Alpha-N-acetylgalactosaminidase precursor	200	213	K.VgNYTEVAGTCNLWR.N	0.04000000000000.0	201
IPI00471800	Tax_Id=10116 Gene_Symbol=Cdh16 Cadherin 16	516	529	R.LRKgNLSYEEAPDHK.V	0.00040000000000.0	519
IPI00471800	Tax_Id=10116 Gene_Symbol=Cdh16 Cadherin 16	518	529	R.KgNLSYEEAPDHK.V	0.040000000000.0	519
IPI00471800	Tax_Id=10116 Gene_Symbol=Cdh16 Cadherin 16	600	613	R.FSLVgNDSEGWLCIK.E	0.00004000000000.0	604
IPI00475946	Tax_Id=10116 Gene_Symbol=Tf Isoform 2 of Serotransferrin precursor	295	322	K.FDEFFSQGCAPGYKKgNSTLCDLCIGPAK.C	0.0000000000000004000000000000.0	310
IPI00475946	Tax_Id=10116 Gene_Symbol=Tf Isoform 2 of Serotransferrin precursor	309	322	K.KgNSTLCDLCIGPAK.C	0.04000000000000.0	310
IPI00475946	Tax_Id=10116 Gene_Symbol=Tf Isoform 2 of Serotransferrin precursor	310	322	K.gNSTLCDLCIGPAK.C	0.4000000000000.0	310
IPI00480731	Tax_Id=10116 Gene_Symbol=Cntn3 Contactin-3 precursor	466	471	K.IMgNVTK.A	0.004000.0	468
IPI00515854	Tax_Id=10116 Gene_Symbol=Entpd2 Ectonucleoside triphosphate diphosphohydrolase 2	127	138	R.LLgNLTSPEATAR.V	0.004000000000.0	129
IPI00551815	Tax_Id=10116 Gene_Symbol=Ybx1-ps3 Ybx1 protein	307	326	K.AADPPAEgNSSAPEAEQGGAE.-	0.00000004000000000000.0	314
IPI00554102	Tax_Id=10116 Gene_Symbol=LOC685482;LOC259246;LOC298116;LOC259245 similar to alpha2u globulin	49	58	R.EKIEQgNGSMR.F	0.0000040010.0	54
IPI00554123	Tax_Id=10116 Gene_Symbol=Agrn Agrin precursor	132	142	K.NELMLgNSSLMR.I	0.00010400010.0	137
IPI00555252	Tax_Id=10116 Gene_Symbol=LOC682005;Gapdh;LOC685186 Glyceraldehyde-3-phosphate dehydrogenase	144	160	K.IVSgNASCTTNCLAPLAK.V	0.00040000000000000.0	147
IPI00558154	Tax_Id=10116 Gene_Symbol=LOC100125372 60 kDa protein	79	93	K.gNTTTYPPMCSQDAAK.G	0.400000010000000.0	79
IPI00563600	Tax_Id=10116 Gene_Symbol=LOC681879 Protein O-mannosyltransferase 2	649	658	R.FSGAgNDTDFR.V	0.0000400000.0	653
IPI00564327	Tax_Id=10116 Gene_Symbol=Mug2 Murinoglobulin-2 precursor	381	399	K.AQEAGYTgNATTTDQHGLAK.F	0.0000000400000000000.0	388
IPI00564327	Tax_Id=10116 Gene_Symbol=Mug2 Murinoglobulin-2 precursor	970	982	K.YLgNETQQLTENIK.S	0.0040000000000.0	972
IPI00565109	Tax_Id=10116 Gene_Symbol=RGD1307220_predicted similar to alpha 3 type VI collagen isoform 1 precursor	756	771	R.DLQNFLEgNVTSSVDVK.D	0.0000000400000000.0	763
IPI00565128	Tax_Id=10116 Gene_Symbol=- 35 kDa protein	145	161	K.IVSgNASCTTNCLAPLAK.V	0.00040000000000000.0	148
IPI00567272	Tax_Id=10116 Gene_Symbol=- 37 kDa protein	158	174	K.IVSgNASCTTNCLAPLAK.V	0.00040000000000000.0	161
IPI00567919	Tax_Id=10116 Gene_Symbol=Ap2a1_predicted 106 kDa protein	634	664	R.DTSSNDINGGVEPTPSgNVSTPSPSADLLGLR.A	0.0000400000000000400000000000000.0	650
IPI00568931	Tax_Id=10116 Gene_Symbol=- 36 kDa protein	143	159	K.IVSgNASCTTNCLAPLAK.V	0.00040000000000000.0	146
IPI00569362	Tax_Id=10116 Gene_Symbol=LOC298111 20 kDa protein	49	58	R.EKIEEgNGSMR.V	0.0000040010.0	54
IPI00569362	Tax_Id=10116 Gene_Symbol=LOC298111 20 kDa protein	51	58	K.IEEgNGSMR.V	0.00040000.0	54
IPI00763060	Tax_Id=10116 Gene_Symbol=LOC684327 similar to inter-alpha (globulin) inhibitor H5	370	390	K.AEGDEGPPPSTIINHgNETFAK.V	0.000000000000000400000.0	385
IPI00763060	Tax_Id=10116 Gene_Symbol=LOC684327 similar to inter-alpha (globulin) inhibitor H5	655	671	K.TLFPNYFgNGSEIVIAGK.M	0.00000004000000000.0	662
IPI00764756	Tax_Id=10116 Gene_Symbol=LOC684529 similar to cathepsin O	216	232	R.GGSPLGALSWLgNETQLK.L	0.00000000000400000.0	227
IPI00764984	Tax_Id=10116 Gene_Symbol=Itgav_predicted 106 kDa protein	16	31	K.AgNTTQPGIIEGGQVLK.C	0.0400000000000000.0	17
IPI00765231	Tax_Id=10116 Gene_Symbol=RGD1564063_predicted hypothetical protein LOC498226	244	264	K.GALDLMLQVgNMTPGHSSAPPK.E	0.000001000410000000000.0	253
IPI00765231	Tax_Id=10116 Gene_Symbol=RGD1564063_predicted hypothetical protein LOC498226	440	450	R.HYVgNLTNGLYR.F	0.00040000000.0	443
IPI00765231	Tax_Id=10116 Gene_Symbol=RGD1564063_predicted hypothetical protein LOC498226	440	450	R.HYVgNLTNGLYR.F	0.00040040000.0	443
IPI00765413	Tax_Id=10116 Gene_Symbol=- 58 kDa protein	151	172	R.VILILDPAISGgNETEPYPAFTR.G	0.0000000000040000000000.0	162
IPI00765413	Tax_Id=10116 Gene_Symbol=- 58 kDa protein	430	445	K.RQDPVSWgNETFEDISR.S	0.0000000400000000.0	437
IPI00765413	Tax_Id=10116 Gene_Symbol=- 58 kDa protein	90	108	R.YGYEgNDTEIANLYDEMVAK.R	0.0000400000000001000.0	94
IPI00767395	Tax_Id=10116 Gene_Symbol=Adam10 similar to ADAM 10 precursor	278	292	R.IgNTTSDEKDPTNPFR.F	0.040000000000000.0	279
IPI00767395	Tax_Id=10116 Gene_Symbol=Adam10 similar to ADAM 10 precursor	534	558	K.EGICNGFTALCPASDPKPgNFTDCNR.H	0.0000400000000000004000000.0	552
IPI00767419	Tax_Id=10116 Gene_Symbol=Siae_predicted sialic acid acetylesterase	421	437	R.AVAYGEKgNLTFQGPLPK.K	0.00000004000000000.0	428
IPI00776785	Tax_Id=10116 Gene_Symbol=Tmem16f_predicted 94 kDa protein	276	284	R.LgNITCESSK.K	0.040000000.0	277
IPI00776785	Tax_Id=10116 Gene_Symbol=Tmem16f_predicted 94 kDa protein	718	735	K.NTDKENPYIGLGgNYTLCR.Y	0.000000000000400000.0	730
IPI00778528	Tax_Id=10116 Gene_Symbol=Hspg2 284 kDa protein	530	565	K.GVgNVTMPSQPGVPPLSSTQLQIDPTLQEFQLVDLSR.R	0.004001000000000000000000000000000000.0	532
IPI00778528	Tax_Id=10116 Gene_Symbol=Hspg2 284 kDa protein	65	71	R.ALVgNFTR.S	0.0004000.0	68
IPI00817070	Tax_Id=10116 Gene_Symbol=LOC685867;LOC684520 hypothetical protein LOC685867	95	110	R.VFDKEGgNGTVMGAEIR.H	0.0000004000000000.0	101
IPI00870112	Tax_Id=10116 Gene_Symbol=Dpysl2 Dihydropyrimidinase-related protein 2	342	361	K.AVGKDNFTLIPEGTgNGTEER.M	0.00000000000000400000.0	356

## Sheet: ERLIC02
Glycoproteins identified in ERLIC02
IPI	description	pep_start	pep_end	glycoPep	mod	glycoSite
IPI00188956	Tax_Id=10116 Gene_Symbol=Thy1 Thy-1 membrane glycoprotein precursor	88	97	K.VLTLAgNFTTK.D	0.0000040000.0	93
IPI00189714	Tax_Id=10116 Gene_Symbol=Col12a1 similar to Collagen alpha-1(XII) chain precursor	2693	2707	K.EAGgNITTDGYEILGK.L	0.000400000000000.0	2696
IPI00189819	Tax_Id=10116 Gene_Symbol=Actb Actin, cytoplasmic 1	2	18	M.DDDIAALVVDgNGSGMCK.A	0.00000000004000000.0	12
IPI00190499	Tax_Id=10116 Gene_Symbol=Tpp1 Tripeptidyl-peptidase 1 precursor	432	447	K.SSSHLPPSSYFgNASGR.A	0.0000000000040000.0	443
IPI00190555	Tax_Id=10116 Gene_Symbol=Folh1 Glutamate carboxypeptidase 2	466	481	R.VDCTPLMHSLVYgNLTK.E	0.0000000000004000.0	478
IPI00190555	Tax_Id=10116 Gene_Symbol=Folh1 Glutamate carboxypeptidase 2	75	81	K.FLYgNFTR.T	0.0004000.0	78
IPI00190577	Tax_Id=10116 Gene_Symbol=Lama5 similar to Laminin alpha-5 chain precursor	924	933	R.LgNVTSPDLFR.L	0.0400000000.0	925
IPI00190606	Tax_Id=10116 Gene_Symbol=Myl1 Myosin light chain 1, skeletal muscle isoform	133	148	R.VFDKEGgNGTVMGAELR.H	0.0000004000000000.0	139
IPI00191090	Tax_Id=10116 Gene_Symbol=Bgn Biglycan precursor	268	281	R.MIEgNGSLSFLPTLR.E	0.00040000000000.0	271
IPI00191738	Tax_Id=10116 Gene_Symbol=Gclm Glutamate--cysteine ligase regulatory subunit	95	107	K.LFIVGSgNSSSSTR.N	0.0000004000000.0	101
IPI00192159	Tax_Id=10116 Gene_Symbol=Ube2d3 Ubiquitin-conjugating enzyme E2 D3	76	93	R.IYHPNINSgNGSICLDILR.S	0.000000004000000000.0	84
IPI00193869	Tax_Id=10116 Gene_Symbol=Clptm1_predicted cleft lip and palate associated transmembrane protein 1	290	304	K.DYYPIgNESLASLPLR.V	0.000004000000000.0	295
IPI00193894	Tax_Id=10116 Gene_Symbol=Mgam_predicted 198 kDa protein	1290	1311	R.VILILDPAISGgNETEPYPAFTR.G	0.0000000000040000000000.0	1301
IPI00193894	Tax_Id=10116 Gene_Symbol=Mgam_predicted 198 kDa protein	1569	1584	R.RQDPVSWgNKTFEDISR.S	0.0000000400000000.0	1576
IPI00193894	Tax_Id=10116 Gene_Symbol=Mgam_predicted 198 kDa protein	942	959	R.IDCYPDEHGVSEAgNCTAR.G	0.000000000000040000.0	955
IPI00194974	Tax_Id=10116 Gene_Symbol=Hnrpk Hnrpk protein	70	86	R.TDYgNASVSVPDSSGPER.I	0.00040000000000000.0	73
IPI00195148	Tax_Id=10116 Gene_Symbol=Es2 Liver carboxylesterase 1 precursor	370	387	R.FSPNLgNISESVIPAIIEK.Y	0.000004000000000000.0	375
IPI00195160	Tax_Id=10116 Gene_Symbol=Psap Sulfated glycoprotein 1 precursor	213	226	R.TgNSSFVQGLVDHVK.E	0.04000000000000.0	214
IPI00195160	Tax_Id=10116 Gene_Symbol=Psap Sulfated glycoprotein 1 precursor	213	231	R.TgNSSFVQGLVDHVKEDCDR.L	0.0400000000000000000.0	214
IPI00195160	Tax_Id=10116 Gene_Symbol=Psap Sulfated glycoprotein 1 precursor	445	468	K.LVIYLEHNLEKgNSTKEEILAALEK.G	0.000000000004000000000000.0	456
IPI00195160	Tax_Id=10116 Gene_Symbol=Psap Sulfated glycoprotein 1 precursor	456	468	K.gNSTKEEILAALEK.G	0.4000000000000.0	456
IPI00195160	Tax_Id=10116 Gene_Symbol=Psap Sulfated glycoprotein 1 precursor	68	92	K.TVVTEAGNLLKDgNATEEEILHYLEK.T	0.0000000000004000000000000.0	80
IPI00195160	Tax_Id=10116 Gene_Symbol=Psap Sulfated glycoprotein 1 precursor	79	92	K.DgNATEEEILHYLEK.T	0.04000000000000.0	80
IPI00195241	Tax_Id=10116 Gene_Symbol=Apoh Beta-2-glycoprotein 1 precursor	203	213	K.TGgNWSALPSCK.A	0.00400000000.0	205
IPI00195516	Tax_Id=10116 Gene_Symbol=Hpx Hemopexin precursor	180	192	R.SWPAVGgNCTAALR.W	0.0000004000000.0	186
IPI00195931	Tax_Id=10116 Gene_Symbol=Tspan8 D6.1A protein	116	126	R.ILgNETLYENAK.L	0.00400000000.0	118
IPI00195957	Tax_Id=10116 Gene_Symbol=Lypd3 Ly6/PLAUR domain-containing protein 3 precursor	119	124	K.LgNLTLR.G	0.040000.0	120
IPI00196620	Tax_Id=10116 Gene_Symbol=Cubn Cubilin precursor	1498	1504	R.GFgNASWR.A	0.0040000.0	1500
IPI00196620	Tax_Id=10116 Gene_Symbol=Cubn Cubilin precursor	1800	1810	R.EGgNATGHLIGR.Y	0.00400000000.0	1802
IPI00196620	Tax_Id=10116 Gene_Symbol=Cubn Cubilin precursor	2530	2537	R.VgNVTNEFK.S	0.04000000.0	2531
IPI00196620	Tax_Id=10116 Gene_Symbol=Cubn Cubilin precursor	3034	3049	R.AITCGGIYgNESSGILR.S	0.0000000040000000.0	3042
IPI00196620	Tax_Id=10116 Gene_Symbol=Cubn Cubilin precursor	3123	3133	K.STgNSSLTLLFK.T	0.00400000000.0	3125
IPI00196620	Tax_Id=10116 Gene_Symbol=Cubn Cubilin precursor	3398	3407	R.EYgNQTFGNLK.S	0.0040000000.0	3400
IPI00196620	Tax_Id=10116 Gene_Symbol=Cubn Cubilin precursor	778	788	K.ICGgNETLFPIR.S	0.00040000000.0	781
IPI00196620	Tax_Id=10116 Gene_Symbol=Cubn Cubilin precursor	94	113	R.KgNTTGLPQNILSQVHQLNSK.L	0.04000000000000000000.0	95
IPI00196922	Tax_Id=10116 Gene_Symbol=Slc9a3r2 25 kDa protein	130	163	R.VVPTEDHVEGPLPSPVTgNGTSLAQLNGGSVCSSR.S	0.0000000000000000040000000400000000.0	147
IPI00197579	Tax_Id=10116 Gene_Symbol=Tubb5 Isoform 1 of Tubulin beta-5 chain	337	350	K.gNSSYFVEWIPNNVK.T	0.40000000004000.0	337
IPI00197684	Tax_Id=10116 Gene_Symbol=Xpnpep2 Membrane-bound aminopeptidase P	35	53	R.DCSTNPPRLPVTAVgNTTMR.L	0.0000000000000040000.0	49
IPI00197684	Tax_Id=10116 Gene_Symbol=Xpnpep2 Membrane-bound aminopeptidase P	43	53	R.LPVTAVgNTTMR.L	0.00000040000.0	49
IPI00197723	Tax_Id=10116 Gene_Symbol=RGD1565681_predicted similar to proline rich 6	223	236	R.SVVTEEFgNGSDWER.A	0.00000004000000.0	230
IPI00197864	Tax_Id=10116 Gene_Symbol=LOC314016 Melanoma-associated antigen MG50 (Fragment)	17	27	R.ILCDNSDgNITR.V	0.00000004000.0	24
IPI00198327	Tax_Id=10116 Gene_Symbol=Vdac2 Voltage-dependent anion-selective channel protein 2	187	209	R.TGDFQLHTNVNgNGTEFGGSIYQK.V	0.00000000000400000000000.0	198
IPI00198405	Tax_Id=10116 Gene_Symbol=Arsb Arylsulfatase B	260	277	R.IYAGMVSLLDEAVGgNVTK.A	0.000000000000004000.0	274
IPI00198717	Tax_Id=10116 Gene_Symbol=Mdh1 Malate dehydrogenase, cytoplasmic	180	199	K.NVIIWGgNHSSTQYPDVNHAK.V	0.00000040000000000000.0	186
IPI00199305	Tax_Id=10116 Gene_Symbol=Atp6v1b2 Vacuolar ATP synthase subunit B, brain isoform	345	381	R.gNGSITQIPILTMPNDDITHPIPDLTGYITEGQIYVDR.Q	0.4000000000000000000000000000000000000.0	345
IPI00199305	Tax_Id=10116 Gene_Symbol=Atp6v1b2 Vacuolar ATP synthase subunit B, brain isoform	345	381	R.gNGSITQIPILTMPNDDITHPIPDLTGYITEGQIYVDR.Q	0.4000000000000400000000000000000000000.0	345
IPI00199305	Tax_Id=10116 Gene_Symbol=Atp6v1b2 Vacuolar ATP synthase subunit B, brain isoform	345	381	R.gNGSITQIPILTMPNDDITHPIPDLTGYITEGQIYVDR.Q	0.4000000000010000000000000000000000000.0	345
IPI00199867	Tax_Id=10116 Gene_Symbol=Emilin1_predicted elastin microfibril interfacer 1	791	804	R.LGALgNSSLLLLEDR.L	0.00004000000000.0	795
IPI00200067	Tax_Id=10116 Gene_Symbol=F11r Junctional adhesion molecule A precursor	182	193	R.AFIgNSSYTIDPK.S	0.000400000000.0	185
IPI00200195	Tax_Id=10116 Gene_Symbol=LOC246120 Putative phospholipase B-like 2 precursor	505	520	R.SDLNPAgNGSYPFQALR.Q	0.0000004000000000.0	511
IPI00200195	Tax_Id=10116 Gene_Symbol=LOC246120 Putative phospholipase B-like 2 precursor	71	90	R.LEYGFHPDAVAWAgNLTNAIR.E	0.00000000000004000000.0	84
IPI00200435	Tax_Id=10116 Gene_Symbol=Pdcd4 Isoform 1 of Programmed cell death protein 4	70	86	R.DSGRGDSVSDgNGSEAVR.S	0.00000000004000000.0	80
IPI00200591	Tax_Id=10116 Gene_Symbol=LOC299282 Serine protease inhibitor A3L precursor	175	187	K.LINDYVSgNQTQGK.I	0.0000000400000.0	182
IPI00200591	Tax_Id=10116 Gene_Symbol=LOC299282 Serine protease inhibitor A3L precursor	264	279	K.YTGgNASALFILPDQGK.M	0.0004000000000000.0	267
IPI00200593	Tax_Id=10116 Gene_Symbol=Serpina3k Serine protease inhibitor A3K precursor	174	187	K.KFINDYVSgNQTQGK.I	0.00000000400000.0	182
IPI00200593	Tax_Id=10116 Gene_Symbol=Serpina3k Serine protease inhibitor A3K precursor	175	187	K.FINDYVSgNQTQGK.I	0.0000000400000.0	182
IPI00200593	Tax_Id=10116 Gene_Symbol=Serpina3k Serine protease inhibitor A3K precursor	264	279	K.YTGgNASALFILPDQGK.M	0.0004000000000000.0	267
IPI00200757	Tax_Id=10116 Gene_Symbol=Fn1 Isoform 1 of Fibronectin precursor	996	1010	K.LDAPTNLQFVgNETDR.T	0.000000000040000.0	1006
IPI00200898	Tax_Id=10116 Gene_Symbol=Slc9a3r1 Ezrin-radixin-moesin-binding phosphoprotein 50	302	329	K.RHDSTEPSSTSSSSDPILDFgNISLAVAK.E	0.0000000000000000000040000000.0	322
IPI00201262	Tax_Id=10116 Gene_Symbol=LOC297568;Mug2;Mug1 Alpha-1-inhibitor 3 precursor	388	404	R.DAGYTgNATTTDQHGLAK.F	0.00000400000000000.0	393
IPI00201262	Tax_Id=10116 Gene_Symbol=LOC297568;Mug2;Mug1 Alpha-1-inhibitor 3 precursor	992	1002	K.YLgNETQQLTEK.I	0.00400000000.0	994
IPI00201276	Tax_Id=10116 Gene_Symbol=Acp2 Lysosomal acid phosphatase precursor	162	170	R.YEQLQgNETR.Q	0.000004000.0	167
IPI00201489	Tax_Id=10116 Gene_Symbol=Ppif Peptidyl-prolyl cis-trans isomerase, mitochondrial precursor	37	60	R.GAgNSSSQNPLVYLDVGADGQPLGR.V	0.004000000000000000000000.0	39
IPI00201617	Tax_Id=10116 Gene_Symbol=LOC259244;Obp3 Alpha-2u globulin	49	58	R.EKIEEgNGSMR.V	0.0000040000.0	54
IPI00201617	Tax_Id=10116 Gene_Symbol=LOC259244;Obp3 Alpha-2u globulin	51	58	K.IEEgNGSMR.V	0.00040000.0	54
IPI00201713	Tax_Id=10116 Gene_Symbol=Ap1b1 Isoform B of AP-1 complex subunit beta-1	765	801	R.NSFGLAPAAPLQVHAPLSPgNQTVEISLPLNTVGSVMK.M	0.0000000000000000000400000000000000010.0	784
IPI00203690	Tax_Id=10116 Gene_Symbol=Aldh9a1 4-trimethylaminobutyraldehyde dehydrogenase	299	317	K.GALLANFLTQGQVCCgNGTR.V	0.0000000000000004000.0	314
IPI00204006	Tax_Id=10116 Gene_Symbol=Fbn1 Fibrillin-1	445	458	K.VLPFgNVTDYCQLVR.Y	0.00004000000000.0	449
IPI00204808	Tax_Id=10116 Gene_Symbol=Mep1b Meprin A subunit beta precursor	215	228	K.TAFQgNGTESTIITK.I	0.00004000000000.0	219
IPI00204808	Tax_Id=10116 Gene_Symbol=Mep1b Meprin A subunit beta precursor	539	553	K.VGVEAFFPgNGTQFSR.G	0.000000004000000.0	547
IPI00205018	Tax_Id=10116 Gene_Symbol=Aldh6a1 Methylmalonate-semialdehyde dehydrogenase [acylating], mitochondrial precursor	439	460	K.IVNDNPYGgNGTAIFTTNGAIAR.K	0.0000000040000000000000.0	447
IPI00205018	Tax_Id=10116 Gene_Symbol=Aldh6a1 Methylmalonate-semialdehyde dehydrogenase [acylating], mitochondrial precursor	439	460	K.IVNDNPYGgNGTAIFTTNGAIAR.K	0.0000000040000000400000.0	447
IPI00205018	Tax_Id=10116 Gene_Symbol=Aldh6a1 Methylmalonate-semialdehyde dehydrogenase [acylating], mitochondrial precursor	439	460	K.IVNDNPYGgNGTAIFTTNGAIAR.K	0.0000400040000000400000.0	447
IPI00205018	Tax_Id=10116 Gene_Symbol=Aldh6a1 Methylmalonate-semialdehyde dehydrogenase [acylating], mitochondrial precursor	439	460	K.IVNDNPYGgNGTAIFTTNGAIAR.K	0.0040000040000000400000.0	447
IPI00205068	Tax_Id=10116 Gene_Symbol=Ap1b1 105 kDa protein	773	809	R.NSFGLAPAAPLQVHAPLSPgNQTVEISLPLNTVGSVMK.M	0.0000000000000000000400000000000000010.0	792
IPI00205325	Tax_Id=10116 Gene_Symbol=Lrp2 Low-density lipoprotein receptor-related protein 2 precursor	141	163	R.NCHYPTCDQLTCANGACYgNTSQR.C	0.00000000000004000040000.0	159
IPI00205325	Tax_Id=10116 Gene_Symbol=Lrp2 Low-density lipoprotein receptor-related protein 2 precursor	1491	1502	K.TWSVFQgNGTDKR.V	0.000000400000.0	1497
IPI00205325	Tax_Id=10116 Gene_Symbol=Lrp2 Low-density lipoprotein receptor-related protein 2 precursor	172	186	R.DSSDEAgNCTTLCSQK.E	0.000000400000000.0	178
IPI00205325	Tax_Id=10116 Gene_Symbol=Lrp2 Low-density lipoprotein receptor-related protein 2 precursor	1723	1743	R.HYSCACPSGWgNLSDDSVNCVR.G	0.000000000040000000000.0	1733
IPI00205325	Tax_Id=10116 Gene_Symbol=Lrp2 Low-density lipoprotein receptor-related protein 2 precursor	2382	2400	K.SCATSQEDFLIYSLgNNSLR.S	0.0000000000000040000.0	2396
IPI00205325	Tax_Id=10116 Gene_Symbol=Lrp2 Low-density lipoprotein receptor-related protein 2 precursor	2481	2501	R.IYYSDFSgNQTINSMAEDGSNR.A	0.000000040000000000000.0	2488
IPI00205325	Tax_Id=10116 Gene_Symbol=Lrp2 Low-density lipoprotein receptor-related protein 2 precursor	2780	2793	R.NCgNSTTEFTCSNGR.C	0.00400000000400.0	2782
IPI00205325	Tax_Id=10116 Gene_Symbol=Lrp2 Low-density lipoprotein receptor-related protein 2 precursor	3444	3463	R.VVLVgNTTHKPFDIHVYHPYR.Q	0.00004000000000000000.0	3448
IPI00205325	Tax_Id=10116 Gene_Symbol=Lrp2 Low-density lipoprotein receptor-related protein 2 precursor	3564	3577	R.DGgNCTSPQALCNAR.Q	0.00400000000000.0	3566
IPI00205325	Tax_Id=10116 Gene_Symbol=Lrp2 Low-density lipoprotein receptor-related protein 2 precursor	4328	4337	R.YgNQSVSNPCK.Q	0.0400000000.0	4329
IPI00206254	Tax_Id=10116 Gene_Symbol=Ggt1 Gamma-glutamyltranspeptidase 1 precursor	226	238	R.AFYgNGSLTAQIVK.D	0.0004000000000.0	229
IPI00206254	Tax_Id=10116 Gene_Symbol=Ggt1 Gamma-glutamyltranspeptidase 1 precursor	503	516	R.LHNQLLPgNTTTVEK.N	0.00000004000000.0	510
IPI00206254	Tax_Id=10116 Gene_Symbol=Ggt1 Gamma-glutamyltranspeptidase 1 precursor	503	516	R.LHNQLLPgNTTTVEK.N	0.00400004000000.0	510
IPI00206268	Tax_Id=10116 Gene_Symbol=- 32 kDa protein	187	209	R.TGDFQLHTNVNgNGTEFGGSIYQK.K	0.00000000000400000000000.0	198
IPI00206268	Tax_Id=10116 Gene_Symbol=- 32 kDa protein	88	109	K.WNTgNNTLGTEIAIENQICQGLK.L	0.0004000000000040000000.0	91
IPI00206336	Tax_Id=10116 Gene_Symbol=Lamp1 Lysosome-associated membrane glycoprotein 1 precursor	57	70	K.VSgNMTLPASAEVLK.N	0.00400000000000.0	59
IPI00206664	Tax_Id=10116 Gene_Symbol=Acp1 Isoform 1 of Low molecular weight phosphotyrosine protein phosphatase	29	41	R.KLVTDEgNVSDNWR.I	0.0000004000000.0	35
IPI00206823	Tax_Id=10116 Gene_Symbol=Obp3 Alpha-2u globulin	49	58	R.EKIEEgNGSMR.V	0.0000040000.0	54
IPI00206823	Tax_Id=10116 Gene_Symbol=Obp3 Alpha-2u globulin	51	58	K.IEEgNGSMR.V	0.00040000.0	54
IPI00207668	Tax_Id=10116 Gene_Symbol=Afm Afamin precursor	396	407	R.HAEDKFgNETTER.S	0.000000400000.0	402
IPI00207702	Tax_Id=10116 Gene_Symbol=Slc22a8 Solute carrier family 22 member 8	91	105	R.ATEPCLDGWIYgNSTR.D	0.000000000004000.0	102
IPI00208205	Tax_Id=10116 Gene_Symbol=Hspa8 Heat shock cognate 71 kDa protein	138	155	K.TVTNAVVTVPAYFgNDSQR.Q	0.000000000000040000.0	151
IPI00208205	Tax_Id=10116 Gene_Symbol=Hspa8 Heat shock cognate 71 kDa protein	470	493	R.GVPQIEVTFDIDANGILgNVSAVDK.S	0.000000000000040004000000.0	487
IPI00208215	Tax_Id=10116 Gene_Symbol=Prdx3 Thioredoxin-dependent peroxide reductase, mitochondrial precursor	151	167	K.NGGLGHMgNITLLSDLTK.Q	0.00000004000000000.0	158
IPI00208422	Tax_Id=10116 Gene_Symbol=Dpp4 Dipeptidyl peptidase 4	514	524	K.KLDFIVLgNETR.F	0.00000004000.0	521
IPI00208422	Tax_Id=10116 Gene_Symbol=Dpp4 Dipeptidyl peptidase 4	515	524	K.LDFIVLgNETR.F	0.0000004000.0	521
IPI00208917	Tax_Id=10116 Gene_Symbol=Aldh7a1 similar to aldehyde dehydrogenase family 7, member A1	49	62	R.EDNEGVFgNGSWGGR.G	0.00000004000000.0	56
IPI00208917	Tax_Id=10116 Gene_Symbol=Aldh7a1 similar to aldehyde dehydrogenase family 7, member A1	49	62	R.EDNEGVFgNGSWGGR.G	0.00400004000000.0	56
IPI00209113	Tax_Id=10116 Gene_Symbol=Myh9 Myosin-9	1705	1717	R.DELADEIAgNSSGK.G	0.0000000040000.0	1713
IPI00209258	Tax_Id=10116 Gene_Symbol=Spna2 Spectrin alpha chain, brain	2018	2047	K.QETFDAGLQAFQQEGIAgNITALKDQLLAAK.H	0.000000000000000004000000000000.0	2035
IPI00209265	Tax_Id=10116 Gene_Symbol=Ggh Gamma-glutamyl hydrolase precursor	175	195	R.NLPEELLNSLASEgNLTANFHK.W	0.000000000000040000000.0	188
IPI00210027	Tax_Id=10116 Gene_Symbol=Itpr1 Isoform 1 of Inositol 1,4,5-trisphosphate receptor type 1	2500	2512	R.VETGEgNCTSPAPK.E	0.0000040000000.0	2505
IPI00210090	Tax_Id=10116 Gene_Symbol=Hnrpu SP120	38	68	R.LQAALDNEAGGRPAMEPGgNGSLDLGGDAAGR.S	0.0000000000000000004000000000000.0	56
IPI00210090	Tax_Id=10116 Gene_Symbol=Hnrpu SP120	38	68	R.LQAALDNEAGGRPAMEPGgNGSLDLGGDAAGR.S	0.0000000000000010004000000000000.0	56
IPI00210090	Tax_Id=10116 Gene_Symbol=Hnrpu SP120	38	68	R.LQAALDNEAGGRPAMEPGgNGSLDLGGDAAGR.S	0.0000004000000010004000000000000.0	56
IPI00210566	Tax_Id=10116 Gene_Symbol=Hspca Heat shock protein HSP 90-alpha	47	58	R.ELISgNSSDALDK.I	0.000040000000.0	51
IPI00210975	Tax_Id=10116 Gene_Symbol=Hyou1 Hypoxia up-regulated protein 1 precursor	510	520	R.VFGSQgNLTTVK.L	0.00000400000.0	515
IPI00210975	Tax_Id=10116 Gene_Symbol=Hyou1 Hypoxia up-regulated protein 1 precursor	822	837	R.LSALDNLLgNHSSIFLK.G	0.0000000040000000.0	830
IPI00210975	Tax_Id=10116 Gene_Symbol=Hyou1 Hypoxia up-regulated protein 1 precursor	860	868	K.VIgNDTWTWK.N	0.004000000.0	862
IPI00210975	Tax_Id=10116 Gene_Symbol=Hyou1 Hypoxia up-regulated protein 1 precursor	926	940	R.TEPPLgNASAGDQEEK.V	0.000004000000000.0	931
IPI00211075	Tax_Id=10116 Gene_Symbol=Serpina3n Serine protease inhibitor A3N precursor	103	115	K.FgNLTETPETEIHR.G	0.0400000000000.0	104
IPI00211075	Tax_Id=10116 Gene_Symbol=Serpina3n Serine protease inhibitor A3N precursor	266	281	K.YTGgNASALFILPDQGK.M	0.0004000000000000.0	269
IPI00211648	Tax_Id=10116 Gene_Symbol=Slc3a1 Neutral and basic amino acid transport protein rBAT	324	339	R.NEIQVgNTSQIPDTVTR.Y	0.0000040000000000.0	329
IPI00212014	Tax_Id=10116 Gene_Symbol=Vcp Transitional endoplasmic reticulum ATPase	390	424	K.LADDVDLEQVAgNETHGHVGADLAALCSEAALQAIR.K	0.00000000000400000000000000000000000.0	401
IPI00212608	Tax_Id=10116 Gene_Symbol=Dab2 Isoform p82 of Disabled homolog 2	181	205	K.KVEEANKAEEgNGSEALMTLDDQANK.L	0.0000000000400000100000000.0	191
IPI00212708	Tax_Id=10116 Gene_Symbol=Fetub Fetub protein	146	162	R.RVLYLPAYgNCTLRPVSK.R	0.00000000400000000.0	154
IPI00212708	Tax_Id=10116 Gene_Symbol=Fetub Fetub protein	147	162	R.VLYLPAYgNCTLRPVSK.R	0.0000000400000000.0	154
IPI00213463	Tax_Id=10116 Gene_Symbol=Actn4 Alpha-actinin-4	675	691	R.ISIEMgNGTLEDQLSHLK.Q	0.00000400000000000.0	680
IPI00213569	Tax_Id=10116 Gene_Symbol=Ugt1a1 UDP-glucuronosyltransferase 1-1 precursor	80	99	R.KYPVPFQNEgNVTAAFVELGR.S	0.00000000040000000000.0	89
IPI00213579	Tax_Id=10116 Gene_Symbol=Tpp2 Tripeptidyl-peptidase 2	152	168	R.KQEEFDIANgNGSSQANK.L	0.00000000040000000.0	161
IPI00213584	Tax_Id=10116 Gene_Symbol=Agxt2 Alanine--glyoxylate aminotransferase 2, mitochondrial precursor	183	194	R.AYSgNHTDIISFR.G	0.000400000000.0	186
IPI00213644	Tax_Id=10116 Gene_Symbol=Ppib Peptidyl-prolyl cis-trans isomerase B precursor	146	158	K.DTgNGSQFFITTVK.T	0.0040000000000.0	148
IPI00214299	Tax_Id=10116 Gene_Symbol=Cbs Isoform I of Cystathionine beta-synthase	274	314	K.IIGVDPEGSILAEPEELgNQTEQTAYEVEGIGYDFIPTVLDR.A	0.00000000000000000400000000000000000000000.0	291
IPI00214373	Tax_Id=10116 Gene_Symbol=Aadat Kynurenine/alpha-aminoadipate aminotransferase mitochondrial precursor	193	212	K.FLYTIPNGNgNPTGNSLTGDR.K	0.00000000040000000000.0	202
IPI00214373	Tax_Id=10116 Gene_Symbol=Aadat Kynurenine/alpha-aminoadipate aminotransferase mitochondrial precursor	193	212	K.FLYTIPNGNgNPTGNSLTGDR.K	0.00000000040004000000.0	202
IPI00214373	Tax_Id=10116 Gene_Symbol=Aadat Kynurenine/alpha-aminoadipate aminotransferase mitochondrial precursor	50	62	K.SAVFTVEgNGSTIR.F	0.0000000400000.0	57
IPI00214787	Tax_Id=10116 Gene_Symbol=Slc16a1 Monocarboxylate transporter 1	473	494	K.ETQSPAPLQgNSSGDPAEEESPV.-	0.0000000004000000000000.0	482
IPI00230859	Tax_Id=10116 Gene_Symbol=Akr1a1 Alcohol dehydrogenase	43	61	R.HIDCASVYGgNETEIGEALK.E	0.0000000004000000000.0	52
IPI00230859	Tax_Id=10116 Gene_Symbol=Akr1a1 Alcohol dehydrogenase	43	68	R.HIDCASVYGgNETEIGEALKESVGAGK.A	0.00000000040000000000000000.0	52
IPI00230862	Tax_Id=10116 Gene_Symbol=Anpep Aminopeptidase N	111	125	R.FTCgNETTNVIIIHSK.K	0.000400000000000.0	114
IPI00230862	Tax_Id=10116 Gene_Symbol=Anpep Aminopeptidase N	231	252	K.ASFgNITLIHPNNLTALSNMLPK.D	0.0004000000000000040000.0	234
IPI00230862	Tax_Id=10116 Gene_Symbol=Anpep Aminopeptidase N	256	273	R.TLQEDPSWgNVTEFHPTPK.M	0.000000004000000000.0	264
IPI00231359	Tax_Id=10116 Gene_Symbol=Acads Acetyl-Coenzyme A dehydrogenase, short chain	151	173	K.IGCFALSEPGgNGSDAGAASTTAR.E	0.00000000004000000000000.0	161
IPI00231359	Tax_Id=10116 Gene_Symbol=Acads Acetyl-Coenzyme A dehydrogenase, short chain	174	185	R.EEGDSWVLgNGTK.A	0.000000004000.0	182
IPI00231610	Tax_Id=10116 Gene_Symbol=Capn1 Calpain-1 catalytic subunit	105	133	R.TDICQGALGDCWLLAAIASLTLgNETILHR.V	0.00000000000000000000004000000.0	127
IPI00231643	Tax_Id=10116 Gene_Symbol=Sod1 Superoxide dismutase	93	103	K.DGVAgNVSIEDR.V	0.00004000000.0	97
IPI00231742	Tax_Id=10116 Gene_Symbol=Cat Catalase	432	444	R.FNSANEDgNVTQVR.T	0.0000000400000.0	439
IPI00231767	Tax_Id=10116 Gene_Symbol=Tpi1 Triosephosphate isomerase	195	206	K.CgNVSEGVAQCTR.I	0.040000000000.0	196
IPI00231789	Tax_Id=10116 Gene_Symbol=Mme Neprilysin	142	152	R.SCIgNESAIDSR.G	0.00040000000.0	145
IPI00231789	Tax_Id=10116 Gene_Symbol=Mme Neprilysin	276	293	K.VMELEKEIAgNATTKPEDR.N	0.000000000400000000.0	285
IPI00231789	Tax_Id=10116 Gene_Symbol=Mme Neprilysin	282	293	K.EIAgNATTKPEDR.N	0.000400000000.0	285
IPI00231789	Tax_Id=10116 Gene_Symbol=Mme Neprilysin	282	302	K.EIAgNATTKPEDRNDPMLLYNK.M	0.000400000000000000000.0	285
IPI00324020	Tax_Id=10116 Gene_Symbol=Glul Glutamine synthetase	358	373	R.TCLLgNETGDEPFQYKN.-	0.0000400000000000.0	362
IPI00324633	Tax_Id=10116 Gene_Symbol=Glud1 Glutamate dehydrogenase 1, mitochondrial precursor	192	200	K.gNYTDNELEK.I	0.400000000.0	192
IPI00324633	Tax_Id=10116 Gene_Symbol=Glud1 Glutamate dehydrogenase 1, mitochondrial precursor	192	200	K.gNYTDNELEK.I	0.400040000.0	192
IPI00325860	Tax_Id=10116 Gene_Symbol=Podxl Podocalyxin precursor	271	290	K.LKCDPAIKPHEELLILgNLTR.D	0.00000000000000004000.0	287
IPI00326070	Tax_Id=10116 Gene_Symbol=Ctsl Cathepsin L1 precursor	213	233	K.YRAEYAVAgNDTGFVDIPQQEK.A	0.000000004000000000000.0	221
IPI00326070	Tax_Id=10116 Gene_Symbol=Ctsl Cathepsin L1 precursor	215	233	R.AEYAVAgNDTGFVDIPQQEK.A	0.0000004000000000000.0	221
IPI00326305	Tax_Id=10116 Gene_Symbol=Atp1a1 Sodium/potassium-transporting ATPase subunit alpha-1 precursor	205	227	R.IISANGCKVDgNSSLTGESEPQTR.S	0.00000000004000000000000.0	215
IPI00326305	Tax_Id=10116 Gene_Symbol=Atp1a1 Sodium/potassium-transporting ATPase subunit alpha-1 precursor	205	227	R.IISANGCKVDgNSSLTGESEPQTR.S	0.00004000004000000000000.0	215
IPI00326305	Tax_Id=10116 Gene_Symbol=Atp1a1 Sodium/potassium-transporting ATPase subunit alpha-1 precursor	213	227	K.VDgNSSLTGESEPQTR.S	0.004000000000000.0	215
IPI00326305	Tax_Id=10116 Gene_Symbol=Atp1a1 Sodium/potassium-transporting ATPase subunit alpha-1 precursor	630	647	K.GVGIISEGgNETVEDIAAR.L	0.000000004000000000.0	638
IPI00327398	Tax_Id=10116 Gene_Symbol=Enpep Isoform 1 of Glutamyl aminopeptidase	233	243	K.ATYgNISLIHPK.E	0.00040000000.0	236
IPI00327398	Tax_Id=10116 Gene_Symbol=Enpep Isoform 1 of Glutamyl aminopeptidase	309	319	K.QTAEYAAgNITK.A	0.00000004000.0	316
IPI00327469	Tax_Id=10116 Gene_Symbol=Ahsg Alpha-2-HS-glycoprotein precursor	155	165	R.FgNDTNVVHTVK.T	0.04000000000.0	156
IPI00327469	Tax_Id=10116 Gene_Symbol=Ahsg Alpha-2-HS-glycoprotein precursor	166	181	K.TALAAFNAQNgNGTYFK.L	0.0000000000400000.0	176
IPI00339124	Tax_Id=10116 Gene_Symbol=Atp1b1 Sodium/potassium-transporting ATPase subunit beta-1	151	170	R.FKLDWLGgNCSGLNDESYGYK.E	0.00000004000000000000.0	158
IPI00339124	Tax_Id=10116 Gene_Symbol=Atp1b1 Sodium/potassium-transporting ATPase subunit beta-1	153	170	K.LDWLGgNCSGLNDESYGYK.E	0.000004000000000000.0	158
IPI00358014	Tax_Id=10116 Gene_Symbol=Btd Biotinidase precursor	82	100	K.GAHIIVFPEDGIHGFgNFTR.T	0.0000000000000004000.0	97
IPI00359123	Tax_Id=10116 Gene_Symbol=RGD1310427_predicted hypothetical protein LOC362643	912	921	R.FINYgNQTVSR.M	0.0000400000.0	916
IPI00360356	Tax_Id=10116 Gene_Symbol=RGD1309504_predicted hypothetical protein LOC294732	198	207	R.GYgNFTTTAER.E	0.0040000000.0	200
IPI00361686	Tax_Id=10116 Gene_Symbol=C1qbp Complement component 1 Q subcomponent-binding protein, mitochondrial precursor	103	117	K.MSGDWELEVgNGTEAK.L	0.100000000400000.0	112
IPI00362160	Tax_Id=10116 Gene_Symbol=Tubb3 Tubulin beta-3 chain	337	350	K.gNSSYFVEWIPNNVK.V	0.40000000004000.0	337
IPI00363849	Tax_Id=10116 Gene_Symbol=Lamc1 similar to Laminin gamma-1 chain precursor	645	653	K.LLNgNLTSIK.I	0.000400000.0	648
IPI00364124	Tax_Id=10116 Gene_Symbol=Lrpap1 Alpha-2-macroglobulin receptor-associated protein precursor	260	275	R.VIDLWDLAQSAgNFTEK.E	0.0000000000040000.0	271
IPI00364439	Tax_Id=10116 Gene_Symbol=RGD1559682_predicted similar to Peptidyl-prolyl cis-trans isomerase A	2	19	M.VNLTMFFgNITADGEPLGR.V	0.000010040000000000.0	9
IPI00364439	Tax_Id=10116 Gene_Symbol=RGD1559682_predicted similar to Peptidyl-prolyl cis-trans isomerase A	92	118	K.HTGPGILSMANAGPNTgNGSQFFICTAK.T	0.000000000000000040000000000.0	108
IPI00364439	Tax_Id=10116 Gene_Symbol=RGD1559682_predicted similar to Peptidyl-prolyl cis-trans isomerase A	92	118	K.HTGPGILSMANAGPNTgNGSQFFICTAK.T	0.000000000000004040000000000.0	108
IPI00364439	Tax_Id=10116 Gene_Symbol=RGD1559682_predicted similar to Peptidyl-prolyl cis-trans isomerase A	92	118	K.HTGPGILSMANAGPNTgNGSQFFICTAK.T	0.000000001000000040000000000.0	108
IPI00364925	Tax_Id=10116 Gene_Symbol=Dhtkd1 Probable 2-oxoglutarate dehydrogenase E1 component DHKTD1, mitochondrial precursor	303	324	R.GRQQSQEDGDYSPgNGSAQPGDK.V	0.0000000000000400000000.0	316
IPI00364925	Tax_Id=10116 Gene_Symbol=Dhtkd1 Probable 2-oxoglutarate dehydrogenase E1 component DHKTD1, mitochondrial precursor	305	324	R.QQSQEDGDYSPgNGSAQPGDK.V	0.00000000000400000000.0	316
IPI00364925	Tax_Id=10116 Gene_Symbol=Dhtkd1 Probable 2-oxoglutarate dehydrogenase E1 component DHKTD1, mitochondrial precursor	565	590	K.gNGTNLDWATAETLALGSLLAQGFNVR.L	0.40000000000000000000000000.0	565
IPI00365545	Tax_Id=10116 Gene_Symbol=Dld Dihydrolipoyl dehydrogenase, mitochondrial precursor	73	89	K.gNETLGGTCLNVGCIPSK.A	0.40000000000000000.0	73
IPI00365944	Tax_Id=10116 Gene_Symbol=Myl6_predicted Myosin light polypeptide 6	95	110	R.VFDKEGgNGTVMGAEIR.H	0.0000004000000000.0	101
IPI00366226	Tax_Id=10116 Gene_Symbol=Gns Glucosamine (N-acetyl)-6-sulfatase	173	183	K.YYgNYTLSINGK.A	0.00400000400.0	175
IPI00366665	Tax_Id=10116 Gene_Symbol=Car12 Membrane-bound carbonic anhydrase 12	86	97	K.LLgNLTNDGHSVR.L	0.004000000000.0	88
IPI00368347	Tax_Id=10116 Gene_Symbol=Ube1x Ubiquitin-activating enzyme E1, Chr X	44	57	K.gNGSEADIDESLYSR.Q	0.40000000000000.0	44
IPI00368347	Tax_Id=10116 Gene_Symbol=Ube1x Ubiquitin-activating enzyme E1, Chr X	807	830	K.IHVSDQELQSAgNASVDDSRLEELK.A	0.000000000004000000000000.0	818
IPI00368570	Tax_Id=10116 Gene_Symbol=RGD1561599_predicted similar to longevity assurance homolog 6	238	250	R.FWLPHgNVTWADLK.N	0.0000040000000.0	243
IPI00370427	Tax_Id=10116 Gene_Symbol=Tinag Tubulointerstitial nephritis antigen	356	365	R.ISSgNETEIMR.E	0.0004000000.0	359
IPI00370427	Tax_Id=10116 Gene_Symbol=Tinag Tubulointerstitial nephritis antigen	356	365	R.ISSgNETEIMR.E	0.0004000010.0	359
IPI00371736	Tax_Id=10116 Gene_Symbol=LOC685174 similar to trinucleotide repeat containing 5	227	248	K.VVMDIPYELWgNETSAEVADLKK.Q	0.0010000000400000000000.0	237
IPI00372372	Tax_Id=10116 Gene_Symbol=Serpinc1 Serine (Or cysteine) peptidase inhibitor, clade C (Antithrombin), member 1	125	133	K.LGACgNNTLK.Q	0.000040000.0	129
IPI00372372	Tax_Id=10116 Gene_Symbol=Serpinc1 Serine (Or cysteine) peptidase inhibitor, clade C (Antithrombin), member 1	217	230	R.VTINNWVAgNKTEGR.I	0.00000000400000.0	225
IPI00372786	Tax_Id=10116 Gene_Symbol=Nid2 similar to nidogen 2 isoform 2	716	723	R.IDQgNITYK.A	0.00040000.0	719
IPI00372804	Tax_Id=10116 Gene_Symbol=Sccpdh Probable saccharopine dehydrogenase	112	136	K.ACIEgNGTSCIDICGEPQFLELMHVK.Y	0.0000400000000000000000000.0	116
IPI00373752	Tax_Id=10116 Gene_Symbol=Flnb_predicted filamin, beta	2245	2265	K.gNGSCGVSYIAQEPGNYEVSIK.F	0.400000000000000000000.0	2245
IPI00382223	Tax_Id=10116 Gene_Symbol=RGD1308874 Ab2-305	141	154	R.VGPgNGTLFVVDAYK.G	0.00040000000000.0	144
IPI00387771	Tax_Id=10116 Gene_Symbol=Ppia Peptidyl-prolyl cis-trans isomerase A	2	19	M.VgNPTVFFDITADGEPLGR.V	0.040000000000000000.0	3
IPI00387771	Tax_Id=10116 Gene_Symbol=Ppia Peptidyl-prolyl cis-trans isomerase A	92	118	K.HTGPGILSMANAGPNTgNGSQFFICTAK.T	0.000000000000000040000000000.0	108
IPI00387771	Tax_Id=10116 Gene_Symbol=Ppia Peptidyl-prolyl cis-trans isomerase A	92	118	K.HTGPGILSMANAGPNTgNGSQFFICTAK.T	0.000000000000004040000000000.0	108
IPI00387771	Tax_Id=10116 Gene_Symbol=Ppia Peptidyl-prolyl cis-trans isomerase A	92	118	K.HTGPGILSMANAGPNTgNGSQFFICTAK.T	0.000000001000000040000000000.0	108
IPI00388265	Tax_Id=10116 Gene_Symbol=Pgcp 48 kDa protein	375	387	K.EVMSLLQPLgNITK.V	0.0000000004000.0	384
IPI00388265	Tax_Id=10116 Gene_Symbol=Pgcp 48 kDa protein	375	387	K.EVMSLLQPLgNITK.V	0.0010000004000.0	384
IPI00389129	Tax_Id=10116 Gene_Symbol=Ank3 Ankyrin G197	1521	1552	R.SFADENNVFHDPVDGWQgNETPSGSLESPAQAR.R	0.00000000000000000400000000000000.0	1538
IPI00392753	Tax_Id=10116 Gene_Symbol=LOC259246;LOC298116;LOC259245;LOC298109 Alpha2u globulin	49	58	R.EKIEEgNGSMR.V	0.0000040000.0	54
IPI00392753	Tax_Id=10116 Gene_Symbol=LOC259246;LOC298116;LOC259245;LOC298109 Alpha2u globulin	51	58	K.IEEgNGSMR.V	0.00040000.0	54
IPI00395285	Tax_Id=10116 Gene_Symbol=Rpl3 60S ribosomal protein L3	301	312	K.NgNASTDYDLSDK.S	0.040000000000.0	302
IPI00400573	Tax_Id=10116 Gene_Symbol=Tubb2c Tubulin beta-2C chain	337	350	K.gNSSYFVEWIPNNVK.T	0.40000000004000.0	337
IPI00400579	Tax_Id=10116 Gene_Symbol=Gaa Lysosomal alpha-glucosidase precursor	465	479	R.GVFITgNETGQPLIGK.V	0.000004000000000.0	470
IPI00400747	Tax_Id=10116 Gene_Symbol=Man2b1 Mannosidase 2, alpha B1	625	638	R.KIENLEQgNISLPVR.Q	0.00000004000000.0	632
IPI00421319	Tax_Id=10116 Gene_Symbol=Tmem106b LRRGT00101	290	302	R.LSgNITNIGPLDMK.Q	0.0040000000000.0	292
IPI00421539	Tax_Id=10116 Gene_Symbol=Aco2 Aconitate hydratase, mitochondrial precursor	379	395	R.VGLIGSCTgNSSYEDMGR.S	0.00000000400000100.0	387
IPI00421601	Tax_Id=10116 Gene_Symbol=Asah1 N-acylsphingosine amidohydrolase 1	254	266	R.SVLEgNSTSYEEAK.N	0.0000400000000.0	258
IPI00421874	Tax_Id=10116 Gene_Symbol=Vdac1 Voltage-dependent anion-selective channel protein 1	237	256	K.VNgNSSLIGLGYTQTLKPGIK.L	0.00400000000000000000.0	239
IPI00422076	Tax_Id=10116 Gene_Symbol=Thbs1 Thrombospondin 1	1065	1077	K.VVgNSTTGPGEHLR.N	0.0040000000000.0	1067
IPI00464518	Tax_Id=10116 Gene_Symbol=Hexb Beta-hexosaminidase beta chain precursor	298	317	K.VGPVDPSLgNTTYVFFDTFFK.E	0.00000000400000000000.0	306
IPI00464785	Tax_Id=10116 Gene_Symbol=Ppgb Protective protein for beta-galactosidase	136	153	K.MYVTgNDTEVAENNYQALK.D	0.000040000000000000.0	140
IPI00464785	Tax_Id=10116 Gene_Symbol=Ppgb Protective protein for beta-galactosidase	322	342	R.LDPPCTgNTTAPSTYLNNPYVR.K	0.000000400000000000000.0	328
IPI00464886	Tax_Id=10116 Gene_Symbol=LOC652956 p55 protein	54	68	R.TgNGSVDLGEEEEAAR.G	0.040000000000000.0	55
IPI00470260	Tax_Id=10116 Gene_Symbol=Gm2a GM2 ganglioside activator protein	148	175	K.EGTYSLPSSgNFTVPDLELPSWLSTGNYR.I	0.0000000004000000000000000000.0	157
IPI00471530	Tax_Id=10116 Gene_Symbol=Lap3 Isoform 1 of Cytosol aminopeptidase	254	282	K.GSEEPPVFLEIHYTGSPgNATEAPLVFVGK.G	0.00000000000000000400000000000.0	271
IPI00471584	Tax_Id=10116 Gene_Symbol=Hspcb Heat shock protein HSP 90-beta	42	53	R.ELISgNASDALDK.I	0.000040000000.0	46
IPI00471607	Tax_Id=10116 Gene_Symbol=Picalm Clathrin-assembly lymphoid leukemia protein	485	509	K.LVSDDLDSSLANLVGNLGIGgNGTTK.N	0.0000000000000000000040000.0	505
IPI00475946	Tax_Id=10116 Gene_Symbol=Tf Isoform 2 of Serotransferrin precursor	309	322	K.KgNSTLCDLCIGPAK.C	0.04000000000000.0	310
IPI00475946	Tax_Id=10116 Gene_Symbol=Tf Isoform 2 of Serotransferrin precursor	310	322	K.gNSTLCDLCIGPAK.C	0.4000000000000.0	310
IPI00515854	Tax_Id=10116 Gene_Symbol=Entpd2 Ectonucleoside triphosphate diphosphohydrolase 2	127	138	R.LLgNLTSPEATAR.V	0.004000000000.0	129
IPI00551815	Tax_Id=10116 Gene_Symbol=Ybx1-ps3 Ybx1 protein	307	326	K.AADPPAEgNSSAPEAEQGGAE.-	0.00000004000000000000.0	314
IPI00554102	Tax_Id=10116 Gene_Symbol=LOC685482;LOC259246;LOC298116;LOC259245 similar to alpha2u globulin	49	58	R.EKIEQgNGSMR.F	0.0000040000.0	54
IPI00558079	Tax_Id=10116 Gene_Symbol=RGD1559704_predicted similar to glyceraldehyde-3-phosphate dehydrogenase	144	160	K.IVSgNASCTTLCLAPLAK.V	0.00040000000000000.0	147
IPI00558154	Tax_Id=10116 Gene_Symbol=LOC100125372 60 kDa protein	79	93	K.gNTTTYPPMCSQDAAK.G	0.400000000000000.0	79
IPI00568085	Tax_Id=10116 Gene_Symbol=LOC298111 19 kDa protein	44	53	R.EKIEEgNGSMR.V	0.0000040000.0	49
IPI00568085	Tax_Id=10116 Gene_Symbol=LOC298111 19 kDa protein	46	53	K.IEEgNGSMR.V	0.00040000.0	49
IPI00765231	Tax_Id=10116 Gene_Symbol=RGD1564063_predicted hypothetical protein LOC498226	440	450	R.HYVgNLTNGLYR.F	0.00040000000.0	443
IPI00765231	Tax_Id=10116 Gene_Symbol=RGD1564063_predicted hypothetical protein LOC498226	440	450	R.HYVgNLTNGLYR.F	0.00040040000.0	443
IPI00778528	Tax_Id=10116 Gene_Symbol=Hspg2 284 kDa protein	65	71	R.ALVgNFTR.S	0.0004000.0	68
IPI00869599	Tax_Id=10116 Gene_Symbol=Acss2_predicted acyl-CoA synthetase short-chain family member 2	570	609	R.IDDMLgNVSGHLLSTAEVESALVEHEAVAEAAVVGHPHPVK.G	0.0000040000000000000000000000000000000000.0	575
IPI00870112	Tax_Id=10116 Gene_Symbol=Dpysl2 Dihydropyrimidinase-related protein 2	342	361	K.AVGKDNFTLIPEGTgNGTEER.M	0.00000000000000400000.0	356
IPI00870112	Tax_Id=10116 Gene_Symbol=Dpysl2 Dihydropyrimidinase-related protein 2	346	361	K.DNFTLIPEGTgNGTEER.M	0.0000000000400000.0	356
IPI00884593	Tax_Id=10116 Gene_Symbol=LOC259246;LOC298116;LOC259245 Rat alpha-2u-globulin	49	58	R.EKIEEgNGSMR.V	0.0000040000.0	54
IPI00884593	Tax_Id=10116 Gene_Symbol=LOC259246;LOC298116;LOC259245 Rat alpha-2u-globulin	51	58	K.IEEgNGSMR.V	0.00040000.0	54

## Sheet: ERLIC03
Glycoproteins identified in ERLIC03
IPI	description	pep_start	pep_end	glycoPep	mod	glycoSite
IPI00188338	Tax_Id=10116 Gene_Symbol=Itih1_predicted inter-alpha trypsin inhibitor, heavy chain 1	259	285	R.DKLCDLLVANNYFTHFFAPQgNLTNMSK.N	0.000000000000000000004000000.0	279
IPI00188338	Tax_Id=10116 Gene_Symbol=Itih1_predicted inter-alpha trypsin inhibitor, heavy chain 1	259	285	R.DKLCDLLVANNYFTHFFAPQgNLTNMSK.N	0.000000000000000000004000100.0	279
IPI00188338	Tax_Id=10116 Gene_Symbol=Itih1_predicted inter-alpha trypsin inhibitor, heavy chain 1	261	285	K.LCDLLVANNYFTHFFAPQgNLTNMSK.N	0.0000000000000000004000000.0	279
IPI00188338	Tax_Id=10116 Gene_Symbol=Itih1_predicted inter-alpha trypsin inhibitor, heavy chain 1	261	285	K.LCDLLVANNYFTHFFAPQgNLTNMSK.N	0.0000000000000000004000100.0	279
IPI00188338	Tax_Id=10116 Gene_Symbol=Itih1_predicted inter-alpha trypsin inhibitor, heavy chain 1	581	589	R.AgNLSSQILK.M	0.040000000.0	582
IPI00188541	Tax_Id=10116 Gene_Symbol=Itih4 inter-alpha-inhibitor H4 heavy chain	561	581	R.ISASGAELEALEAQVLgNLSLK.Y	0.000000000000000040000.0	577
IPI00188881	Tax_Id=10116 Gene_Symbol=Slc22a2 Organic cation transporter OCT2	92	114	R.YEVDWgNQSTLDCVDPLSSLAADR.N	0.00000400000000000000000.0	97
IPI00188885	Tax_Id=10116 Gene_Symbol=Agrn Isoform 1 of Agrin precursor	811	830	K.AGFAQCICPTLTCPEAgNSTK.V	0.00000000000000004000.0	827
IPI00188956	Tax_Id=10116 Gene_Symbol=Thy1 Thy-1 membrane glycoprotein precursor	88	107	K.VLTLAgNFTTKDEGDYMCELR.V	0.00000400000000000000.0	93
IPI00188956	Tax_Id=10116 Gene_Symbol=Thy1 Thy-1 membrane glycoprotein precursor	88	107	K.VLTLAgNFTTKDEGDYMCELR.V	0.00000400000000010000.0	93
IPI00188956	Tax_Id=10116 Gene_Symbol=Thy1 Thy-1 membrane glycoprotein precursor	88	97	K.VLTLAgNFTTK.D	0.0000040000.0	93
IPI00189619	Tax_Id=10116 Gene_Symbol=Mst1 Macrophage stimulating protein precursor	302	315	R.GTTgNTTSAGVPCQR.W	0.00040000000000.0	305
IPI00189619	Tax_Id=10116 Gene_Symbol=Mst1 Macrophage stimulating protein precursor	617	628	K.GTSgNSTVLHVAK.M	0.000400000000.0	620
IPI00189714	Tax_Id=10116 Gene_Symbol=Col12a1 similar to Collagen alpha-1(XII) chain precursor	2540	2549	K.MLEAYgNLTEK.N	0.0000040000.0	2545
IPI00189714	Tax_Id=10116 Gene_Symbol=Col12a1 similar to Collagen alpha-1(XII) chain precursor	2540	2549	K.MLEAYgNLTEK.N	0.1000040000.0	2545
IPI00189714	Tax_Id=10116 Gene_Symbol=Col12a1 similar to Collagen alpha-1(XII) chain precursor	2693	2707	K.EAGgNITTDGYEILGK.L	0.000400000000000.0	2696
IPI00189759	Tax_Id=10116 Gene_Symbol=LOC316632 NADH dehydrogenase 1 alpha subcomplex 10-like protein	303	326	R.EVLgNYTTVPVYLPEITIGAHQGSR.I	0.000400000000000000000000.0	306
IPI00190287	Tax_Id=10116 Gene_Symbol=Prelp Prolargin precursor	321	348	K.IgNGTQICPSNLVAFHDFSSDLENVPHLR.Y	0.0400000000000000000000000000.0	322
IPI00190287	Tax_Id=10116 Gene_Symbol=Prelp Prolargin precursor	321	348	K.IgNGTQICPSNLVAFHDFSSDLENVPHLR.Y	0.0400000004000000000000000000.0	322
IPI00190499	Tax_Id=10116 Gene_Symbol=Tpp1 Tripeptidyl-peptidase 1 precursor	215	245	R.DVGSGTTgNNSQACAQFLEQYFHNSDLTEFMR.L	0.0000000400000000000000000000000.0	222
IPI00190555	Tax_Id=10116 Gene_Symbol=Folh1 Glutamate carboxypeptidase 2	75	81	K.FLYgNFTR.T	0.0004000.0	78
IPI00190577	Tax_Id=10116 Gene_Symbol=Lama5 similar to Laminin alpha-5 chain precursor	2212	2222	R.LgNASIADLQSK.L	0.04000000000.0	2213
IPI00190577	Tax_Id=10116 Gene_Symbol=Lama5 similar to Laminin alpha-5 chain precursor	2421	2431	K.QELSQDgNATLK.A	0.00000040000.0	2427
IPI00190577	Tax_Id=10116 Gene_Symbol=Lama5 similar to Laminin alpha-5 chain precursor	2568	2586	R.QLLAgNSSALVETILGHQER.L	0.0000400000000000000.0	2572
IPI00190577	Tax_Id=10116 Gene_Symbol=Lama5 similar to Laminin alpha-5 chain precursor	3201	3218	R.VFADGAPHYVAFYSgNVTR.V	0.000000000000004000.0	3215
IPI00190577	Tax_Id=10116 Gene_Symbol=Lama5 similar to Laminin alpha-5 chain precursor	924	933	R.LgNVTSPDLFR.L	0.0400000000.0	925
IPI00190606	Tax_Id=10116 Gene_Symbol=Myl1 Myosin light chain 1, skeletal muscle isoform	133	148	R.VFDKEGgNGTVMGAELR.H	0.0000004000000000.0	139
IPI00191090	Tax_Id=10116 Gene_Symbol=Bgn Biglycan precursor	268	281	R.MIEgNGSLSFLPTLR.E	0.00040000000000.0	271
IPI00191090	Tax_Id=10116 Gene_Symbol=Bgn Biglycan precursor	268	281	R.MIEgNGSLSFLPTLR.E	0.10040000000000.0	271
IPI00191437	Tax_Id=10116 Gene_Symbol=- 64 kDa protein	134	152	R.YGYEgNDTEIANLYDEMVAK.Q	0.0000400000000000000.0	138
IPI00191437	Tax_Id=10116 Gene_Symbol=- 64 kDa protein	134	152	R.YGYEgNDTEIANLYDEMVAK.Q	0.0000400000000001000.0	138
IPI00191437	Tax_Id=10116 Gene_Symbol=- 64 kDa protein	134	152	R.YGYEgNDTEIANLYDEMVAK.Q	0.0000400000400000000.0	138
IPI00191437	Tax_Id=10116 Gene_Symbol=- 64 kDa protein	195	216	R.VILILDPAISGgNETEPYPAFTR.G	0.0000000000040000000000.0	206
IPI00191437	Tax_Id=10116 Gene_Symbol=- 64 kDa protein	237	260	K.VWPDYPgNITVDPSLDWDSQVQQYR.A	0.000000400000000000000000.0	243
IPI00191437	Tax_Id=10116 Gene_Symbol=- 64 kDa protein	474	489	K.RQDPVSWgNKTFEDISR.S	0.0000000400000000.0	481
IPI00191681	Tax_Id=10116 Gene_Symbol=Itgb1 Integrin beta-1 precursor	203	220	K.LRNPCTSEQgNCTSPFSYK.N	0.000000000400000000.0	212
IPI00191711	Tax_Id=10116 Gene_Symbol=LOC259246;LOC298116;LOC259245 Major urinary protein precursor	49	58	R.EKIEEgNGSMR.V	0.0000040000.0	54
IPI00191711	Tax_Id=10116 Gene_Symbol=LOC259246;LOC298116;LOC259245 Major urinary protein precursor	51	58	K.IEEgNGSMR.V	0.00040000.0	54
IPI00191715	Tax_Id=10116 Gene_Symbol=Orm1 Alpha-1-acid glycoprotein precursor	83	102	R.EFQTTDDQCVYgNFTHLGVQR.E	0.00000000000400000000.0	94
IPI00191737	Tax_Id=10116 Gene_Symbol=Alb Serum albumin precursor	131	168	K.DDNPNLPPFQRPEAEAMCTSFQEgNPTSFLGHYLHEVAR.R	0.00000000000000000000000400000000000000.0	154
IPI00191738	Tax_Id=10116 Gene_Symbol=Gclm Glutamate--cysteine ligase regulatory subunit	95	107	K.LFIVGSgNSSSSTR.N	0.0000004000000.0	101
IPI00191929	Tax_Id=10116 Gene_Symbol=Tmem27 Collectrin precursor	65	80	R.EGTEISHVLLCgNVTQR.V	0.0000000000040000.0	76
IPI00191929	Tax_Id=10116 Gene_Symbol=Tmem27 Collectrin precursor	81	106	R.VSFWFVVTDPLKgNHTLPAAEVQSAIR.M	0.00000000000040000000000000.0	93
IPI00192159	Tax_Id=10116 Gene_Symbol=Ube2d3 Ubiquitin-conjugating enzyme E2 D3	76	93	R.IYHPNINSgNGSICLDILR.S	0.000000004000000000.0	84
IPI00192279	Tax_Id=10116 Gene_Symbol=- 28 kDa protein	235	255	R.RSGPSDEGEEEMEDGTVTgNGS.-	0.000000000001000000400.0	253
IPI00192279	Tax_Id=10116 Gene_Symbol=- 28 kDa protein	236	255	R.SGPSDEGEEEMEDGTVTgNGS.-	0.00000000000000000400.0	253
IPI00192279	Tax_Id=10116 Gene_Symbol=- 28 kDa protein	236	255	R.SGPSDEGEEEMEDGTVTgNGS.-	0.00000000001000000400.0	253
IPI00192302	Tax_Id=10116 Gene_Symbol=Itih3 99 kDa protein	575	591	R.GDEKEgNITAEALELSLK.Y	0.00000400000000000.0	580
IPI00192310	Tax_Id=10116 Gene_Symbol=Bcam Lutheran antigen	314	323	K.GgNLTLEGVHR.S	0.0400000000.0	315
IPI00192504	Tax_Id=10116 Gene_Symbol=Mrc2 Macrophage mannose receptor 2 precursor	63	75	R.VIPVCgNASLPAQR.W	0.0000040000000.0	68
IPI00192796	Tax_Id=10116 Gene_Symbol=RGD1564625_predicted similar to Transmembrane 9 superfamily protein member 3 precursor	302	312	R.IVDVgNLTSEGK.V	0.00004000000.0	306
IPI00193425	Tax_Id=10116 Gene_Symbol=Bsg Isoform 2 of Basigin precursor	143	160	K.TSDTGDQTISgNGTEANSK.Y	0.000000000040000000.0	153
IPI00193425	Tax_Id=10116 Gene_Symbol=Bsg Isoform 2 of Basigin precursor	37	54	K.TQLTCFLgNSSGIDIVGHR.W	0.000000040000000000.0	44
IPI00193869	Tax_Id=10116 Gene_Symbol=Clptm1_predicted cleft lip and palate associated transmembrane protein 1	290	304	K.DYYPIgNESLASLPLR.V	0.000004000000000.0	295
IPI00193894	Tax_Id=10116 Gene_Symbol=Mgam_predicted 198 kDa protein	1290	1311	R.VILILDPAISGgNETEPYPAFTR.G	0.0000000000040000000000.0	1301
IPI00193894	Tax_Id=10116 Gene_Symbol=Mgam_predicted 198 kDa protein	1569	1584	R.RQDPVSWgNKTFEDISR.S	0.0000000400000000.0	1576
IPI00193894	Tax_Id=10116 Gene_Symbol=Mgam_predicted 198 kDa protein	426	449	K.LVIILDPAISgNNSLSSNPYGPYDR.G	0.000000000040000000000000.0	436
IPI00193894	Tax_Id=10116 Gene_Symbol=Mgam_predicted 198 kDa protein	455	468	K.VWVgNSSDGNALIGK.V	0.00040000000000.0	458
IPI00193894	Tax_Id=10116 Gene_Symbol=Mgam_predicted 198 kDa protein	671	688	K.DQDPASFGEDSLLLgNSSR.H	0.000000000000004000.0	685
IPI00193894	Tax_Id=10116 Gene_Symbol=Mgam_predicted 198 kDa protein	942	959	R.IDCYPDEHGVSEAgNCTAR.G	0.000000000000040000.0	955
IPI00194733	Tax_Id=10116 Gene_Symbol=Atrn Isoform 1 of Attractin precursor	1195	1204	R.DLDMFIgNASK.N	0.0001004000.0	1201
IPI00194958	Tax_Id=10116 Gene_Symbol=Picalm Isoform 2 of Phosphatidylinositol-binding clathrin assembly protein	480	504	K.LVSDDLDSSLANLVGNLGIGgNGTTK.N	0.0000000000000000000040000.0	500
IPI00194974	Tax_Id=10116 Gene_Symbol=Hnrpk Hnrpk protein	70	86	R.TDYgNASVSVPDSSGPER.I	0.00040000000000000.0	73
IPI00195148	Tax_Id=10116 Gene_Symbol=Es2 Liver carboxylesterase 1 precursor	300	316	K.LDgNTSMSTVIDGVVLPK.T	0.00400000000000000.0	302
IPI00195148	Tax_Id=10116 Gene_Symbol=Es2 Liver carboxylesterase 1 precursor	300	316	K.LDgNTSMSTVIDGVVLPK.T	0.00400100000000000.0	302
IPI00195148	Tax_Id=10116 Gene_Symbol=Es2 Liver carboxylesterase 1 precursor	369	387	K.RFSPNLgNISESVIPAIIEK.Y	0.0000004000000000000.0	375
IPI00195148	Tax_Id=10116 Gene_Symbol=Es2 Liver carboxylesterase 1 precursor	370	387	R.FSPNLgNISESVIPAIIEK.Y	0.000004000000000000.0	375
IPI00195160	Tax_Id=10116 Gene_Symbol=Psap Sulfated glycoprotein 1 precursor	213	231	R.TgNSSFVQGLVDHVKEDCDR.L	0.0400000000000000000.0	214
IPI00195160	Tax_Id=10116 Gene_Symbol=Psap Sulfated glycoprotein 1 precursor	445	468	K.LVIYLEHNLEKgNSTKEEILAALEK.G	0.000000000004000000000000.0	456
IPI00195160	Tax_Id=10116 Gene_Symbol=Psap Sulfated glycoprotein 1 precursor	68	92	K.TVVTEAGNLLKDgNATEEEILHYLEK.T	0.0000000000004000000000000.0	80
IPI00195160	Tax_Id=10116 Gene_Symbol=Psap Sulfated glycoprotein 1 precursor	79	92	K.DgNATEEEILHYLEK.T	0.04000000000000.0	80
IPI00195173	Tax_Id=10116 Gene_Symbol=Cd59 CD59 glycoprotein precursor	37	55	K.TgNSTCSPNLDACLVAVSGK.Q	0.0400000000000000000.0	38
IPI00195241	Tax_Id=10116 Gene_Symbol=Apoh Beta-2-glycoprotein 1 precursor	110	125	K.TSVGgNSSFYQDTVVFK.C	0.0000400000000000.0	114
IPI00195241	Tax_Id=10116 Gene_Symbol=Apoh Beta-2-glycoprotein 1 precursor	203	213	K.TGgNWSALPSCK.A	0.00400000000.0	205
IPI00195241	Tax_Id=10116 Gene_Symbol=Apoh Beta-2-glycoprotein 1 precursor	49	75	R.YTTFEYPNTIGFACNPGYYLgNGTSSSK.C	0.000000000000000000004000000.0	69
IPI00195372	Tax_Id=10116 Gene_Symbol=Eef1a1 Elongation factor 1-alpha 1	267	290	R.VETGVLKPGMVVTFAPVgNVTTEVK.S	0.000000000000000004000000.0	284
IPI00195516	Tax_Id=10116 Gene_Symbol=Hpx Hemopexin precursor	178	192	K.ERSWPAVGgNCTAALR.W	0.000000004000000.0	186
IPI00195516	Tax_Id=10116 Gene_Symbol=Hpx Hemopexin precursor	180	192	R.SWPAVGgNCTAALR.W	0.0000004000000.0	186
IPI00195673	Tax_Id=10116 Gene_Symbol=Tubb6 Tubulin, beta 6	337	350	K.gNSSYFVEWIPNNVK.V	0.40000000000000.0	337
IPI00195673	Tax_Id=10116 Gene_Symbol=Tubb6 Tubulin, beta 6	363	379	K.MASTFIGgNSTAIQELFK.R	0.00000004000000000.0	370
IPI00195931	Tax_Id=10116 Gene_Symbol=Tspan8 D6.1A protein	116	126	R.ILgNETLYENAK.L	0.00400000000.0	118
IPI00196226	Tax_Id=10116 Gene_Symbol=RGD1303130 Uncharacterized protein C1orf85 homolog precursor	126	152	R.LLEFDSTgNVSEGTQPPGKPYPPYSLAK.F	0.000000040000000000000000000.0	133
IPI00196620	Tax_Id=10116 Gene_Symbol=Cubn Cubilin precursor	1811	1831	R.YCGNSLPGgNYSSAEGHSLWVR.F	0.000000004000000000000.0	1819
IPI00196620	Tax_Id=10116 Gene_Symbol=Cubn Cubilin precursor	2073	2090	R.FTSDTSVAGTGFgNASFHK.S	0.000000000000400000.0	2085
IPI00196620	Tax_Id=10116 Gene_Symbol=Cubn Cubilin precursor	2410	2429	R.YCGgNSTPSSVDTSSNVASVK.F	0.00040000000000000000.0	2413
IPI00196620	Tax_Id=10116 Gene_Symbol=Cubn Cubilin precursor	2530	2537	R.VgNVTNEFK.S	0.04000000.0	2531
IPI00196620	Tax_Id=10116 Gene_Symbol=Cubn Cubilin precursor	3034	3049	R.AITCGGIYgNESSGILR.S	0.0000000040000000.0	3042
IPI00196620	Tax_Id=10116 Gene_Symbol=Cubn Cubilin precursor	3123	3133	K.STgNSSLTLLFK.T	0.00400000000.0	3125
IPI00196620	Tax_Id=10116 Gene_Symbol=Cubn Cubilin precursor	3149	3181	R.ETIGPQQGCGGYLTEDgNQSFVSPDSDSNGRYDK.G	0.000000000000000040000000000000000.0	3165
IPI00196620	Tax_Id=10116 Gene_Symbol=Cubn Cubilin precursor	3149	3181	R.ETIGPQQGCGGYLTEDgNQSFVSPDSDSNGRYDK.G	0.000000000000000040000000000400000.0	3165
IPI00196620	Tax_Id=10116 Gene_Symbol=Cubn Cubilin precursor	3398	3407	R.EYgNQTFGNLK.S	0.0040000000.0	3400
IPI00196620	Tax_Id=10116 Gene_Symbol=Cubn Cubilin precursor	777	788	R.KICGgNETLFPIR.S	0.000040000000.0	781
IPI00196620	Tax_Id=10116 Gene_Symbol=Cubn Cubilin precursor	778	788	K.ICGgNETLFPIR.S	0.00040000000.0	781
IPI00196661	Tax_Id=10116 Gene_Symbol=Ywhaq 14-3-3 protein theta	92	115	R.SICTTVLELLDKYLIAgNATNPESK.V	0.000000000000000040000000.0	108
IPI00196725	Tax_Id=10116 Gene_Symbol=Fthfd 10-formyltetrahydrofolate dehydrogenase	242	274	K.LTFFNSTLgNTSGLSTQGEALPIPGAHRPGVVTK.A	0.000000004000000000000000000000000.0	250
IPI00197592	Tax_Id=10116 Gene_Symbol=F3 Tissue factor precursor	36	47	K.AFgNLTWISTDFK.T	0.004000000000.0	38
IPI00197684	Tax_Id=10116 Gene_Symbol=Xpnpep2 Membrane-bound aminopeptidase P	35	53	R.DCSTNPPRLPVTAVgNTTMR.L	0.0000000000000040000.0	49
IPI00197684	Tax_Id=10116 Gene_Symbol=Xpnpep2 Membrane-bound aminopeptidase P	35	53	R.DCSTNPPRLPVTAVgNTTMR.L	0.0000000000000040010.0	49
IPI00197684	Tax_Id=10116 Gene_Symbol=Xpnpep2 Membrane-bound aminopeptidase P	406	435	R.RNEgNFSSGPSFETISASGLNAALAHYSPTK.E	0.000400000000000000000000000000.0	409
IPI00197684	Tax_Id=10116 Gene_Symbol=Xpnpep2 Membrane-bound aminopeptidase P	406	435	R.RNEgNFSSGPSFETISASGLNAALAHYSPTK.E	0.000400000000000000040000000000.0	409
IPI00197684	Tax_Id=10116 Gene_Symbol=Xpnpep2 Membrane-bound aminopeptidase P	407	435	R.NEgNFSSGPSFETISASGLNAALAHYSPTK.E	0.00400000000000000000000000000.0	409
IPI00197684	Tax_Id=10116 Gene_Symbol=Xpnpep2 Membrane-bound aminopeptidase P	43	53	R.LPVTAVgNTTMR.L	0.00000040000.0	49
IPI00197684	Tax_Id=10116 Gene_Symbol=Xpnpep2 Membrane-bound aminopeptidase P	43	53	R.LPVTAVgNTTMR.L	0.00000040010.0	49
IPI00197684	Tax_Id=10116 Gene_Symbol=Xpnpep2 Membrane-bound aminopeptidase P	64	84	K.SgNLSAYIIPDTDAHMSEYIGK.H	0.040000000000000000000.0	65
IPI00197684	Tax_Id=10116 Gene_Symbol=Xpnpep2 Membrane-bound aminopeptidase P	64	84	K.SgNLSAYIIPDTDAHMSEYIGK.H	0.040000000000001000000.0	65
IPI00197723	Tax_Id=10116 Gene_Symbol=RGD1565681_predicted similar to proline rich 6	223	236	R.SVVTEEFgNGSDWER.A	0.00000004000000.0	230
IPI00198021	Tax_Id=10116 Gene_Symbol=Umod Uromodulin precursor	440	458	K.TSLQPMVSALgNISLGGTGK.F	0.0000010000400000000.0	450
IPI00198327	Tax_Id=10116 Gene_Symbol=Vdac2 Voltage-dependent anion-selective channel protein 2	187	209	R.TGDFQLHTNVNgNGTEFGGSIYQK.V	0.00000000000400000000000.0	198
IPI00198405	Tax_Id=10116 Gene_Symbol=Arsb Arylsulfatase B	260	277	R.IYAGMVSLLDEAVGgNVTK.A	0.000000000000004000.0	274
IPI00198667	Tax_Id=10116 Gene_Symbol=Clu Clusterin precursor	324	335	R.QELgNDSLQVAER.L	0.000400000000.0	327
IPI00198717	Tax_Id=10116 Gene_Symbol=Mdh1 Malate dehydrogenase, cytoplasmic	180	199	K.NVIIWGgNHSSTQYPDVNHAK.V	0.00000040000000000000.0	186
IPI00198717	Tax_Id=10116 Gene_Symbol=Mdh1 Malate dehydrogenase, cytoplasmic	7	32	R.VLVTGAAGQIAYSLLYSIGgNGSVFGK.D	0.00000000000000000004000000.0	26
IPI00198903	Tax_Id=10116 Gene_Symbol=Angptl3 Angiopoietin-like 3	290	304	K.DGSQNFgNQTWENYEK.G	0.000000400000000.0	296
IPI00199305	Tax_Id=10116 Gene_Symbol=Atp6v1b2 Vacuolar ATP synthase subunit B, brain isoform	345	381	R.gNGSITQIPILTMPNDDITHPIPDLTGYITEGQIYVDR.Q	0.4000000000000000000000000000000000000.0	345
IPI00199305	Tax_Id=10116 Gene_Symbol=Atp6v1b2 Vacuolar ATP synthase subunit B, brain isoform	345	381	R.gNGSITQIPILTMPNDDITHPIPDLTGYITEGQIYVDR.Q	0.4000000000000400000000000000000000000.0	345
IPI00199448	Tax_Id=10116 Gene_Symbol=Lgals3bp Mama	396	407	R.SLgNLTEDVYKPR.L	0.004000000000.0	398
IPI00199448	Tax_Id=10116 Gene_Symbol=Lgals3bp Mama	531	543	K.APIPGTQETgNSSK.T	0.0000000004000.0	540
IPI00199448	Tax_Id=10116 Gene_Symbol=Lgals3bp Mama	64	76	R.ALGYEgNATQALSR.A	0.0000040000000.0	69
IPI00199585	Tax_Id=10116 Gene_Symbol=Slc22a5 Organic cation/carnitine transporter 2	86	101	R.LATIAgNFSALGLEPGR.D	0.0000040000000000.0	91
IPI00199607	Tax_Id=10116 Gene_Symbol=Ceacam1_v4;Ceacam1_v1;Ceacam1;Ceacam1_v3 carcinoembryonic antigen-related cell adhesion molecule isoform 2	368	378	R.MTLSQDgNSTLR.I	0.10000040000.0	374
IPI00199861	Tax_Id=10116 Gene_Symbol=Dcn Decorin precursor	202	227	R.ISDTgNITAIPQGLPTSISELHLDGNK.I	0.00004000000000000000000000.0	206
IPI00199867	Tax_Id=10116 Gene_Symbol=Emilin1_predicted elastin microfibril interfacer 1	450	459	K.LEVLLAgNVSR.E	0.0000004000.0	456
IPI00199867	Tax_Id=10116 Gene_Symbol=Emilin1_predicted elastin microfibril interfacer 1	561	578	R.LgNLTAAQLSQLEGLLQAR.G	0.040000000000000000.0	562
IPI00199867	Tax_Id=10116 Gene_Symbol=Emilin1_predicted elastin microfibril interfacer 1	765	779	R.ESgNSTSLTQAALLEK.L	0.004000000000000.0	767
IPI00199867	Tax_Id=10116 Gene_Symbol=Emilin1_predicted elastin microfibril interfacer 1	791	804	R.LGALgNSSLLLLEDR.L	0.00004000000000.0	795
IPI00200067	Tax_Id=10116 Gene_Symbol=F11r Junctional adhesion molecule A precursor	182	193	R.AFIgNSSYTIDPK.S	0.000400000000.0	185
IPI00200257	Tax_Id=10116 Gene_Symbol=Cdh13 T-cadherin	637	652	K.IgNNTHALVSLLQNLNK.A	0.0400000000000000.0	638
IPI00200591	Tax_Id=10116 Gene_Symbol=LOC299282 Serine protease inhibitor A3L precursor	101	121	K.FgNLTEITEEEIHQGFGHLLQR.L	0.040000000000000000000.0	102
IPI00200591	Tax_Id=10116 Gene_Symbol=LOC299282 Serine protease inhibitor A3L precursor	174	187	K.KLINDYVSgNQTQGK.I	0.00000000400000.0	182
IPI00200591	Tax_Id=10116 Gene_Symbol=LOC299282 Serine protease inhibitor A3L precursor	174	187	K.KLINDYVSgNQTQGK.I	0.00040000400000.0	182
IPI00200591	Tax_Id=10116 Gene_Symbol=LOC299282 Serine protease inhibitor A3L precursor	175	187	K.LINDYVSgNQTQGK.I	0.0000000400000.0	182
IPI00200591	Tax_Id=10116 Gene_Symbol=LOC299282 Serine protease inhibitor A3L precursor	175	187	K.LINDYVSgNQTQGK.I	0.0040000400000.0	182
IPI00200591	Tax_Id=10116 Gene_Symbol=LOC299282 Serine protease inhibitor A3L precursor	213	232	K.WKVPFNPgNDTFESEFYLDEK.R	0.00000004000000000000.0	220
IPI00200591	Tax_Id=10116 Gene_Symbol=LOC299282 Serine protease inhibitor A3L precursor	213	233	K.WKVPFNPgNDTFESEFYLDEKR.S	0.000000040000000000000.0	220
IPI00200591	Tax_Id=10116 Gene_Symbol=LOC299282 Serine protease inhibitor A3L precursor	215	232	K.VPFNPgNDTFESEFYLDEK.R	0.000004000000000000.0	220
IPI00200591	Tax_Id=10116 Gene_Symbol=LOC299282 Serine protease inhibitor A3L precursor	215	233	K.VPFNPgNDTFESEFYLDEKR.S	0.0000040000000000000.0	220
IPI00200591	Tax_Id=10116 Gene_Symbol=LOC299282 Serine protease inhibitor A3L precursor	264	279	K.YTGgNASALFILPDQGK.M	0.0004000000000000.0	267
IPI00200593	Tax_Id=10116 Gene_Symbol=Serpina3k Serine protease inhibitor A3K precursor	101	121	K.FgNLTEITEEEIHQGFGHLLQR.L	0.040000000000000000000.0	102
IPI00200593	Tax_Id=10116 Gene_Symbol=Serpina3k Serine protease inhibitor A3K precursor	174	187	K.KFINDYVSgNQTQGK.I	0.00000000400000.0	182
IPI00200593	Tax_Id=10116 Gene_Symbol=Serpina3k Serine protease inhibitor A3K precursor	174	187	K.KFINDYVSgNQTQGK.I	0.00040000400000.0	182
IPI00200593	Tax_Id=10116 Gene_Symbol=Serpina3k Serine protease inhibitor A3K precursor	175	187	K.FINDYVSgNQTQGK.I	0.0000000400000.0	182
IPI00200593	Tax_Id=10116 Gene_Symbol=Serpina3k Serine protease inhibitor A3K precursor	175	187	K.FINDYVSgNQTQGK.I	0.0040000400000.0	182
IPI00200593	Tax_Id=10116 Gene_Symbol=Serpina3k Serine protease inhibitor A3K precursor	213	232	K.WKVPFNPgNDTFESEFYLDEK.R	0.00000004000000000000.0	220
IPI00200593	Tax_Id=10116 Gene_Symbol=Serpina3k Serine protease inhibitor A3K precursor	213	233	K.WKVPFNPgNDTFESEFYLDEKR.S	0.000000040000000000000.0	220
IPI00200593	Tax_Id=10116 Gene_Symbol=Serpina3k Serine protease inhibitor A3K precursor	215	232	K.VPFNPgNDTFESEFYLDEK.R	0.000004000000000000.0	220
IPI00200593	Tax_Id=10116 Gene_Symbol=Serpina3k Serine protease inhibitor A3K precursor	215	233	K.VPFNPgNDTFESEFYLDEKR.S	0.0000040000000000000.0	220
IPI00200593	Tax_Id=10116 Gene_Symbol=Serpina3k Serine protease inhibitor A3K precursor	264	279	K.YTGgNASALFILPDQGK.M	0.0004000000000000.0	267
IPI00200640	Tax_Id=10116 Gene_Symbol=Mucdhl Isoform 1 of Mucin and cadherin-like protein precursor	133	141	K.EYgNVSEDTR.V	0.004000000.0	135
IPI00200640	Tax_Id=10116 Gene_Symbol=Mucdhl Isoform 1 of Mucin and cadherin-like protein precursor	154	176	K.ATDADKDDILVYTLQEVTPgNASK.F	0.00000000000000000004000.0	173
IPI00200640	Tax_Id=10116 Gene_Symbol=Mucdhl Isoform 1 of Mucin and cadherin-like protein precursor	433	443	R.IEVEAgNNTVTK.D	0.00000400000.0	438
IPI00200743	Tax_Id=10116 Gene_Symbol=B3gnt1_predicted UDP-GlcNAc:betaGal beta-1,3-N-acetylglucosaminyltransferase 1	168	178	R.ETNVGgNQTVVR.V	0.00000400000.0	173
IPI00200743	Tax_Id=10116 Gene_Symbol=B3gnt1_predicted UDP-GlcNAc:betaGal beta-1,3-N-acetylglucosaminyltransferase 1	319	325	R.LYgNVTDR.V	0.0040000.0	321
IPI00200747	Tax_Id=10116 Gene_Symbol=Ece1 Isoform A of Endothelin-converting enzyme 1	198	209	K.LGGWgNITGPWAK.D	0.000040000000.0	202
IPI00200757	Tax_Id=10116 Gene_Symbol=Fn1 Isoform 1 of Fibronectin precursor	516	533	R.DQCIVDDITYNVgNDTFHK.R	0.000000000000400000.0	528
IPI00200757	Tax_Id=10116 Gene_Symbol=Fn1 Isoform 1 of Fibronectin precursor	996	1010	K.LDAPTNLQFVgNETDR.T	0.000000000040000.0	1006
IPI00200998	Tax_Id=10116 Gene_Symbol=Pdzk1 PDZ domain-containing protein 1	172	199	K.AGVLADDHLIEVNGENVEgNASHEEVVEK.V	0.0000000000000004004000000000.0	190
IPI00200998	Tax_Id=10116 Gene_Symbol=Pdzk1 PDZ domain-containing protein 1	333	350	R.FSPLLYCQSQELPgNGSVK.E	0.000000000000040000.0	346
IPI00201262	Tax_Id=10116 Gene_Symbol=LOC297568;Mug2;Mug1 Alpha-1-inhibitor 3 precursor	290	308	R.LDNNGCSTQEVgNITEFQLK.E	0.0004000000040000000.0	301
IPI00201262	Tax_Id=10116 Gene_Symbol=LOC297568;Mug2;Mug1 Alpha-1-inhibitor 3 precursor	290	308	R.LDNNGCSTQEVgNITEFQLK.E	0.0040000000040000000.0	301
IPI00201262	Tax_Id=10116 Gene_Symbol=LOC297568;Mug2;Mug1 Alpha-1-inhibitor 3 precursor	386	404	K.ARDAGYTgNATTTDQHGLAK.F	0.0000000400000000000.0	393
IPI00201262	Tax_Id=10116 Gene_Symbol=LOC297568;Mug2;Mug1 Alpha-1-inhibitor 3 precursor	388	404	R.DAGYTgNATTTDQHGLAK.F	0.00000400000000000.0	393
IPI00201262	Tax_Id=10116 Gene_Symbol=LOC297568;Mug2;Mug1 Alpha-1-inhibitor 3 precursor	867	880	K.SLGNVgNFSVSAEAR.Q	0.00000400000000.0	872
IPI00201262	Tax_Id=10116 Gene_Symbol=LOC297568;Mug2;Mug1 Alpha-1-inhibitor 3 precursor	992	1002	K.YLgNETQQLTEK.I	0.00400000000.0	994
IPI00201410	Tax_Id=10116 Gene_Symbol=Ppp3ca Isoform 1 of Serine/threonine-protein phosphatase 2B catalytic subunit alpha isoform	502	521	K.ALASETgNGTDSgNGSNSSNIQ.-	0.00000040000400000000.0	508513
IPI00201413	Tax_Id=10116 Gene_Symbol=Acaa2 3-ketoacyl-CoA thiolase, mitochondrial	333	360	K.SLDLDPSKTgNVSGGAIALGHPLGGSGSR.I	0.0000000004000000000000000000.0	342
IPI00202440	Tax_Id=10116 Gene_Symbol=Igh-1a Igh-1a protein	315	323	R.EEQYgNSTFR.V	0.000040000.0	319
IPI00203384	Tax_Id=10116 Gene_Symbol=Klkb1 Plasma kallikrein precursor	447	460	R.IYGGILgNLSEITNK.T	0.00000040000000.0	453
IPI00204006	Tax_Id=10116 Gene_Symbol=Fbn1 Fibrillin-1	1570	1587	K.AWGTPCELCPPVgNTSEYK.I	0.000000000000400000.0	1582
IPI00204006	Tax_Id=10116 Gene_Symbol=Fbn1 Fibrillin-1	445	458	K.VLPFgNVTDYCQLVR.Y	0.00004000000000.0	449
IPI00204348	Tax_Id=10116 Gene_Symbol=Nt5e 5~-nucleotidase precursor	331	343	R.IKLDgNYSTQELGR.T	0.0000400000000.0	335
IPI00204348	Tax_Id=10116 Gene_Symbol=Nt5e 5~-nucleotidase precursor	333	343	K.LDgNYSTQELGR.T	0.00400000000.0	335
IPI00204451	Tax_Id=10116 Gene_Symbol=Cfi Complement factor I precursor	181	190	K.IgNSTECLHVR.C	0.0400000000.0	182
IPI00204451	Tax_Id=10116 Gene_Symbol=Cfi Complement factor I precursor	507	518	R.WGEVDLIGgNCSR.F	0.000000004000.0	515
IPI00204504	Tax_Id=10116 Gene_Symbol=Plvap Plasmalemma vesicle-associated protein	86	94	K.QLgNISTLVK.D	0.004000000.0	88
IPI00204808	Tax_Id=10116 Gene_Symbol=Mep1b Meprin A subunit beta precursor	186	214	K.EHNFNIYgNDSVSDSLNVPYDYTSVMHYSK.T	0.00000004000000000000000000000.0	193
IPI00204808	Tax_Id=10116 Gene_Symbol=Mep1b Meprin A subunit beta precursor	215	228	K.TAFQgNGTESTIITK.I	0.00004000000000.0	219
IPI00204808	Tax_Id=10116 Gene_Symbol=Mep1b Meprin A subunit beta precursor	539	553	K.VGVEAFFPgNGTQFSR.G	0.000000004000000.0	547
IPI00204984	Tax_Id=10116 Gene_Symbol=Bst1 ADP-ribosyl cyclase 2 precursor	77	99	K.VVLDKDPCSVLPSDYDLFIgNLSR.H	0.00000000000000000004000.0	96
IPI00205018	Tax_Id=10116 Gene_Symbol=Aldh6a1 Methylmalonate-semialdehyde dehydrogenase [acylating], mitochondrial precursor	439	460	K.IVNDNPYGgNGTAIFTTNGAIAR.K	0.0000000040000000000000.0	447
IPI00205018	Tax_Id=10116 Gene_Symbol=Aldh6a1 Methylmalonate-semialdehyde dehydrogenase [acylating], mitochondrial precursor	439	460	K.IVNDNPYGgNGTAIFTTNGAIAR.K	0.0000000040000000400000.0	447
IPI00205018	Tax_Id=10116 Gene_Symbol=Aldh6a1 Methylmalonate-semialdehyde dehydrogenase [acylating], mitochondrial precursor	439	460	K.IVNDNPYGgNGTAIFTTNGAIAR.K	0.0000400040000000400000.0	447
IPI00205018	Tax_Id=10116 Gene_Symbol=Aldh6a1 Methylmalonate-semialdehyde dehydrogenase [acylating], mitochondrial precursor	439	460	K.IVNDNPYGgNGTAIFTTNGAIAR.K	0.0040000040000000400000.0	447
IPI00205068	Tax_Id=10116 Gene_Symbol=Ap1b1 105 kDa protein	773	809	R.NSFGLAPAAPLQVHAPLSPgNQTVEISLPLNTVGSVMK.M	0.0000000000000000000400000000000000000.0	792
IPI00205135	Tax_Id=10116 Gene_Symbol=Tgm2 Transglutaminase 2, C polypeptide	513	544	R.TVSYNGVLGPECGTEDIgNLTLDPYSENSIPLR.I	0.00000000000000000400000000000000.0	530
IPI00205135	Tax_Id=10116 Gene_Symbol=Tgm2 Transglutaminase 2, C polypeptide	513	544	R.TVSYNGVLGPECGTEDIgNLTLDPYSENSIPLR.I	0.00004000000000000400000000000000.0	530
IPI00205166	Tax_Id=10116 Gene_Symbol=Itga6 similar to integrin alpha 6 isoform 2	956	967	R.LWgNSTFLEEYSK.L	0.004000000000.0	958
IPI00205325	Tax_Id=10116 Gene_Symbol=Lrp2 Low-density lipoprotein receptor-related protein 2 precursor	1162	1194	R.CISPLYVCDGDKDCADGSDEAGCVLgNCTSAQFK.C	0.000000000000000000000000040000000.0	1187
IPI00205325	Tax_Id=10116 Gene_Symbol=Lrp2 Low-density lipoprotein receptor-related protein 2 precursor	141	163	R.NCHYPTCDQLTCANGACYgNTSQR.C	0.00000000000000000040000.0	159
IPI00205325	Tax_Id=10116 Gene_Symbol=Lrp2 Low-density lipoprotein receptor-related protein 2 precursor	141	163	R.NCHYPTCDQLTCANGACYgNTSQR.C	0.00000000000004000040000.0	159
IPI00205325	Tax_Id=10116 Gene_Symbol=Lrp2 Low-density lipoprotein receptor-related protein 2 precursor	1491	1501	K.TWSVFQgNGTDK.R	0.00000040000.0	1497
IPI00205325	Tax_Id=10116 Gene_Symbol=Lrp2 Low-density lipoprotein receptor-related protein 2 precursor	1491	1502	K.TWSVFQgNGTDKR.V	0.000000400000.0	1497
IPI00205325	Tax_Id=10116 Gene_Symbol=Lrp2 Low-density lipoprotein receptor-related protein 2 precursor	172	186	R.DSSDEAgNCTTLCSQK.E	0.000000400000000.0	178
IPI00205325	Tax_Id=10116 Gene_Symbol=Lrp2 Low-density lipoprotein receptor-related protein 2 precursor	1723	1743	R.HYSCACPSGWgNLSDDSVNCVR.G	0.000000000040000000000.0	1733
IPI00205325	Tax_Id=10116 Gene_Symbol=Lrp2 Low-density lipoprotein receptor-related protein 2 precursor	2382	2400	K.SCATSQEDFLIYSLgNNSLR.S	0.0000000000000040000.0	2396
IPI00205325	Tax_Id=10116 Gene_Symbol=Lrp2 Low-density lipoprotein receptor-related protein 2 precursor	2480	2501	R.RIYYSDFSgNQTINSMAEDGSNR.A	0.0000000040000000000000.0	2488
IPI00205325	Tax_Id=10116 Gene_Symbol=Lrp2 Low-density lipoprotein receptor-related protein 2 precursor	2481	2501	R.IYYSDFSgNQTINSMAEDGSNR.A	0.000000040000000000000.0	2488
IPI00205325	Tax_Id=10116 Gene_Symbol=Lrp2 Low-density lipoprotein receptor-related protein 2 precursor	2481	2501	R.IYYSDFSgNQTINSMAEDGSNR.A	0.000000040000010000000.0	2488
IPI00205325	Tax_Id=10116 Gene_Symbol=Lrp2 Low-density lipoprotein receptor-related protein 2 precursor	2481	2501	R.IYYSDFSgNQTINSMAEDGSNR.A	0.000000040004010000000.0	2488
IPI00205325	Tax_Id=10116 Gene_Symbol=Lrp2 Low-density lipoprotein receptor-related protein 2 precursor	278	304	R.CISIDKVCDGVPDCPEGDDENgNVTSGR.T	0.000000000000000000000400000.0	299
IPI00205325	Tax_Id=10116 Gene_Symbol=Lrp2 Low-density lipoprotein receptor-related protein 2 precursor	278	304	R.CISIDKVCDGVPDCPEGDDENgNVTSGR.T	0.000000000000000000004400000.0	299
IPI00205325	Tax_Id=10116 Gene_Symbol=Lrp2 Low-density lipoprotein receptor-related protein 2 precursor	2780	2793	R.NCgNSTTEFTCSNGR.C	0.00400000000000.0	2782
IPI00205325	Tax_Id=10116 Gene_Symbol=Lrp2 Low-density lipoprotein receptor-related protein 2 precursor	2780	2793	R.NCgNSTTEFTCSNGR.C	0.00400000000400.0	2782
IPI00205325	Tax_Id=10116 Gene_Symbol=Lrp2 Low-density lipoprotein receptor-related protein 2 precursor	2780	2793	R.NCgNSTTEFTCSNGR.C	0.40400000000400.0	2782
IPI00205325	Tax_Id=10116 Gene_Symbol=Lrp2 Low-density lipoprotein receptor-related protein 2 precursor	284	304	K.VCDGVPDCPEGDDENgNVTSGR.T	0.000000000000000400000.0	299
IPI00205325	Tax_Id=10116 Gene_Symbol=Lrp2 Low-density lipoprotein receptor-related protein 2 precursor	3308	3326	K.MIAQHCVDAgNNTFCFEHPR.G	0.0000000004000000000.0	3317
IPI00205325	Tax_Id=10116 Gene_Symbol=Lrp2 Low-density lipoprotein receptor-related protein 2 precursor	3564	3577	R.DGgNCTSPQALCNAR.Q	0.00400000000000.0	3566
IPI00205325	Tax_Id=10116 Gene_Symbol=Lrp2 Low-density lipoprotein receptor-related protein 2 precursor	3564	3577	R.DGgNCTSPQALCNAR.Q	0.00400000000400.0	3566
IPI00205325	Tax_Id=10116 Gene_Symbol=Lrp2 Low-density lipoprotein receptor-related protein 2 precursor	447	479	K.VFSTDINGLNTQEILgNVSVDTPENLAVDWINNK.L	0.000000000000000400000004000000000.0	462
IPI00205325	Tax_Id=10116 Gene_Symbol=Lrp2 Low-density lipoprotein receptor-related protein 2 precursor	447	479	K.VFSTDINGLNTQEILgNVSVDTPENLAVDWINNK.L	0.000000400000000400000000000000000.0	462
IPI00205325	Tax_Id=10116 Gene_Symbol=Lrp2 Low-density lipoprotein receptor-related protein 2 precursor	853	882	R.AWSDGSHLMPIVgNTSLGWPNGLAIDWSASR.L	0.000000000000400000000000000000.0	865
IPI00205325	Tax_Id=10116 Gene_Symbol=Lrp2 Low-density lipoprotein receptor-related protein 2 precursor	853	882	R.AWSDGSHLMPIVgNTSLGWPNGLAIDWSASR.L	0.000000000000400000040000000000.0	865
IPI00205566	Tax_Id=10116 Gene_Symbol=Cnn3 Calponin-3	272	318	K.YCAAPTEPVIHNGSQGTGTgNGSEISDSDYQAEYPDEYHGEYPDEYPR.E	0.00000000000000000004000000000000000000000000000.0	291
IPI00205566	Tax_Id=10116 Gene_Symbol=Cnn3 Calponin-3	272	318	K.YCAAPTEPVIHgNGSQGTGTgNGSEISDSDYQAEYPDEYHGEYPDEYPR.E	0.00000000000400000004000000000000000000000000000.0	283291
IPI00206188	Tax_Id=10116 Gene_Symbol=Alcam CD166 antigen precursor	161	172	R.DSYPDGgNITWYR.N	0.000000400000.0	167
IPI00206188	Tax_Id=10116 Gene_Symbol=Alcam CD166 antigen precursor	473	493	K.IIISPEEgNVTLTCTAENQLER.T	0.000000040000000000000.0	480
IPI00206254	Tax_Id=10116 Gene_Symbol=Ggt1 Gamma-glutamyltranspeptidase 1 precursor	226	238	R.AFYgNGSLTAQIVK.D	0.0004000000000.0	229
IPI00206254	Tax_Id=10116 Gene_Symbol=Ggt1 Gamma-glutamyltranspeptidase 1 precursor	411	446	R.VSGILFNDEMDDFSSPgNFTNQFGVAPSPANFIKPGK.Q	0.000000000000000040000000000000000000.0	427
IPI00206254	Tax_Id=10116 Gene_Symbol=Ggt1 Gamma-glutamyltranspeptidase 1 precursor	411	446	R.VSGILFNDEMDDFSSPgNFTNQFGVAPSPANFIKPGK.Q	0.000000000100000040000000000004000000.0	427
IPI00206254	Tax_Id=10116 Gene_Symbol=Ggt1 Gamma-glutamyltranspeptidase 1 precursor	411	446	R.VSGILFNDEMDDFSSPgNFTNQFGVAPSPANFIKPGK.Q	0.000000000100000040040000000000000000.0	427
IPI00206254	Tax_Id=10116 Gene_Symbol=Ggt1 Gamma-glutamyltranspeptidase 1 precursor	411	446	R.VSGILFNDEMDDFSSPgNFTNQFGVAPSPANFIKPGK.Q	0.000000400100000040000000000000000000.0	427
IPI00206254	Tax_Id=10116 Gene_Symbol=Ggt1 Gamma-glutamyltranspeptidase 1 precursor	503	516	R.LHNQLLPgNTTTVEK.N	0.00000004000000.0	510
IPI00206268	Tax_Id=10116 Gene_Symbol=- 32 kDa protein	187	209	R.TGDFQLHTNVNgNGTEFGGSIYQK.K	0.00000000000400000000000.0	198
IPI00206268	Tax_Id=10116 Gene_Symbol=- 32 kDa protein	88	109	K.WNTgNNTLGTEIAIENQICQGLK.L	0.0004000000000040000000.0	91
IPI00206298	Tax_Id=10116 Gene_Symbol=Lgmn Legumain precursor	61	99	R.NGIPDEQIIVMMYDDIANNEENPTPGVVINRPgNGTDVYK.G	0.000000000000000000000000000000004000000.0	93
IPI00206298	Tax_Id=10116 Gene_Symbol=Lgmn Legumain precursor	61	99	R.NGIPDEQIIVMMYDDIANNEENPTPGVVINRPgNGTDVYK.G	0.000000000000000000000000000004004000000.0	93
IPI00206298	Tax_Id=10116 Gene_Symbol=Lgmn Legumain precursor	61	99	R.NGIPDEQIIVMMYDDIANNEENPTPGVVINRPgNGTDVYK.G	0.000000000000000000400000000000004000000.0	93
IPI00206298	Tax_Id=10116 Gene_Symbol=Lgmn Legumain precursor	61	99	R.NGIPDEQIIVMMYDDIANNEENPTPGVVINRPgNGTDVYK.G	0.400000000000000000000000000000004000000.0	93
IPI00206298	Tax_Id=10116 Gene_Symbol=Lgmn Legumain precursor	61	99	R.NGIPDEQIIVMMYDDIANNEENPTPGVVINRPgNGTDVYK.G	0.400000000000000000000000000004004000000.0	93
IPI00206298	Tax_Id=10116 Gene_Symbol=Lgmn Legumain precursor	61	99	R.NGIPDEQIIVMMYDDIANNEENPTPGVVINRPgNGTDVYK.G	0.400000000000000004000000000000004000000.0	93
IPI00206298	Tax_Id=10116 Gene_Symbol=Lgmn Legumain precursor	61	99	R.NGIPDEQIIVMMYDDIANNEENPTPGVVINRPgNGTDVYK.G	0.400000000001000000000000000004004000000.0	93
IPI00206298	Tax_Id=10116 Gene_Symbol=Lgmn Legumain precursor	61	99	R.NGIPDEQIIVMMYDDIANNEENPTPGVVINRPgNGTDVYK.G	0.400000000010000004000000000000004000000.0	93
IPI00206298	Tax_Id=10116 Gene_Symbol=Lgmn Legumain precursor	61	99	R.NGIPDEQIIVMMYDDIANNEEgNPTPGVVINRPgNGTDVYK.G	0.000000000000000000000400000000004000000.0	82,93
IPI00206336	Tax_Id=10116 Gene_Symbol=Lamp1 Lysosome-associated membrane glycoprotein 1 precursor	57	70	K.VSgNMTLPASAEVLK.N	0.00400000000000.0	59
IPI00206336	Tax_Id=10116 Gene_Symbol=Lamp1 Lysosome-associated membrane glycoprotein 1 precursor	57	70	K.VSgNMTLPASAEVLK.N	0.00410000000000.0	59
IPI00206403	Tax_Id=10116 Gene_Symbol=Lum Lumican precursor	120	137	K.KLHINYNgNLTESVGPLPK.S	0.000000040000000000.0	127
IPI00206403	Tax_Id=10116 Gene_Symbol=Lum Lumican precursor	121	137	K.LHINYNgNLTESVGPLPK.S	0.00000040000000000.0	127
IPI00206403	Tax_Id=10116 Gene_Symbol=Lum Lumican precursor	85	106	K.AFEgNVTDLQWLILDHNLLENSK.I	0.0004000000000000000000.0	88
IPI00206467	Tax_Id=10116 Gene_Symbol=Pecam Platelet endothelial cell adhesion molecule precursor	303	318	K.ASSILVgNITELFPRPK.L	0.0000004000000000.0	309
IPI00206668	Tax_Id=10116 Gene_Symbol=Entpd1 Ectonucleoside triphosphate diphosphohydrolase 1	289	302	K.VVgNVSELYGTPCTK.R	0.00400000000000.0	291
IPI00207068	Tax_Id=10116 Gene_Symbol=Glg1 Golgi apparatus protein 1 precursor	156	163	K.LgNLTTDPK.F	0.04000000.0	157
IPI00207180	Tax_Id=10116 Gene_Symbol=Slc6a18 Sodium- and chloride-dependent transporter XTRP2	343	359	R.DEYPSVLMYLgNATQPER.V	0.00000000004000000.0	353
IPI00207180	Tax_Id=10116 Gene_Symbol=Slc6a18 Sodium- and chloride-dependent transporter XTRP2	343	359	R.DEYPSVLMYLgNATQPER.V	0.00000001004000000.0	353
IPI00207668	Tax_Id=10116 Gene_Symbol=Afm Afamin precursor	396	407	R.HAEDKFgNETTER.S	0.000000400000.0	402
IPI00207702	Tax_Id=10116 Gene_Symbol=Slc22a8 Solute carrier family 22 member 8	91	105	R.ATEPCLDGWIYgNSTR.D	0.000000000004000.0	102
IPI00208118	Tax_Id=10116 Gene_Symbol=Cald1 Non-muscle caldesmon	131	150	R.MQNNSAEgNETAEGEEKGESR.S	0.00000004000000000000.0	138
IPI00208183	Tax_Id=10116 Gene_Symbol=Lass2 Longevity assurance homolog 2	14	28	R.LWLPVgNLTWADLEDK.D	0.000004000000000.0	19
IPI00208183	Tax_Id=10116 Gene_Symbol=Lass2 Longevity assurance homolog 2	14	31	R.LWLPVgNLTWADLEDKDGR.V	0.000004000000000000.0	19
IPI00208205	Tax_Id=10116 Gene_Symbol=Hspa8 Heat shock cognate 71 kDa protein	138	155	K.TVTNAVVTVPAYFgNDSQR.Q	0.000000000000040000.0	151
IPI00208215	Tax_Id=10116 Gene_Symbol=Prdx3 Thioredoxin-dependent peroxide reductase, mitochondrial precursor	151	167	K.NGGLGHMgNITLLSDLTK.Q	0.00000004000000000.0	158
IPI00208306	Tax_Id=10116 Gene_Symbol=Tpt1 Translationally-controlled tumor protein	39	85	R.TEGAIDDSLIGGgNASAEGPEGEGTESTVVTGVDIVMNHHLQETSFTK.E	0.00000000000040000000000000000000000000000000000.0	51
IPI00208382	Tax_Id=10116 Gene_Symbol=Ppt1 Palmitoyl-protein thioesterase 1 precursor	230	248	K.FFgNDSIVDPVDSEWFGFYR.S	0.0040000000000000000.0	232
IPI00208422	Tax_Id=10116 Gene_Symbol=Dpp4 Dipeptidyl peptidase 4	146	161	K.IPgNNTQWITWSQEGHK.L	0.0040000000000000.0	148
IPI00208422	Tax_Id=10116 Gene_Symbol=Dpp4 Dipeptidyl peptidase 4	317	330	R.IQgNYSVMAICDYDK.T	0.00400010000000.0	319
IPI00208422	Tax_Id=10116 Gene_Symbol=Dpp4 Dipeptidyl peptidase 4	514	524	K.KLDFIVLgNETR.F	0.00000004000.0	521
IPI00208422	Tax_Id=10116 Gene_Symbol=Dpp4 Dipeptidyl peptidase 4	515	524	K.LDFIVLgNETR.F	0.0000004000.0	521
IPI00208422	Tax_Id=10116 Gene_Symbol=Dpp4 Dipeptidyl peptidase 4	671	692	R.YMGLPTPEDNLDHYRgNSTVMSR.A	0.0000000000000004000000.0	686
IPI00208659	Tax_Id=10116 Gene_Symbol=Cfh Complement inhibitory factor H	1051	1068	K.DNSCVNPPHVPgNATILTR.H	0.000000000004000000.0	1062
IPI00208659	Tax_Id=10116 Gene_Symbol=Cfh Complement inhibitory factor H	521	527	K.NgNNTWFK.L	0.0400000.0	522
IPI00208659	Tax_Id=10116 Gene_Symbol=Cfh Complement inhibitory factor H	757	779	K.STGIDAIHPNKNEFNHgNFSVSYR.C	0.00000000000000004000000.0	773
IPI00208917	Tax_Id=10116 Gene_Symbol=Aldh7a1 similar to aldehyde dehydrogenase family 7, member A1	49	62	R.EDNEGVFgNGSWGGR.G	0.00000004000000.0	56
IPI00209113	Tax_Id=10116 Gene_Symbol=Myh9 Myosin-9	1278	1295	K.LQVELDSVTGLLgNQSDSK.S	0.000000000000400000.0	1290
IPI00209113	Tax_Id=10116 Gene_Symbol=Myh9 Myosin-9	1705	1717	R.DELADEIAgNSSGK.G	0.0000000040000.0	1713
IPI00209908	Tax_Id=10116 Gene_Symbol=mt-Co2 Cytochrome c oxidase subunit 2	179	217	R.LNQATVTSNRPGLFYGQCSEICGSgNHSFMPIVLEMVPLK.Y	0.000000000000000000000000400000000000000.0	203
IPI00209975	Tax_Id=10116 Gene_Symbol=C4bpb C4b-binding protein beta chain precursor	215	225	K.DLCgNATENFVR.Q	0.00040000000.0	218
IPI00210090	Tax_Id=10116 Gene_Symbol=Hnrpu SP120	38	68	R.LQAALDNEAGGRPAMEPGgNGSLDLGGDAAGR.S	0.0000000000000000004000000000000.0	56
IPI00210090	Tax_Id=10116 Gene_Symbol=Hnrpu SP120	38	68	R.LQAALDNEAGGRPAMEPGgNGSLDLGGDAAGR.S	0.0000000000000010004000000000000.0	56
IPI00210091	Tax_Id=10116 Gene_Symbol=Serpina3m similar to Serine protease inhibitor A3M precursor	266	279	K.YTGgNSSALFILPDK.G	0.00040000000000.0	269
IPI00210183	Tax_Id=10116 Gene_Symbol=Mecr Trans-2-enoyl-CoA reductase, mitochondrial precursor	174	210	R.MLVDFEQLQPGDSVIQgNASNSGVGQAVIQIASALGLK.T	0.0000000000000000400000000000000000000.0	190
IPI00210234	Tax_Id=10116 Gene_Symbol=Pls3 Plastin-3	516	534	K.ATDDIIVNWVgNGTLSEAGK.S	0.0000000000400000000.0	526
IPI00210566	Tax_Id=10116 Gene_Symbol=Hspca Heat shock protein HSP 90-alpha	47	58	R.ELISgNSSDALDK.I	0.000040000000.0	51
IPI00210824	Tax_Id=10116 Gene_Symbol=Serpina6 Corticosteroid-binding globulin precursor	306	328	K.DVLEDLNIKDLLTgNQSDFSGNTK.D	0.00000000000004000000000.0	319
IPI00210824	Tax_Id=10116 Gene_Symbol=Serpina6 Corticosteroid-binding globulin precursor	315	328	K.DLLTgNQSDFSGNTK.D	0.00004000000000.0	319
IPI00210824	Tax_Id=10116 Gene_Symbol=Serpina6 Corticosteroid-binding globulin precursor	340	362	K.AMLQLDEGNVLPgNSTNGAPLHLR.S	0.00000000000040040000000.0	352
IPI00210824	Tax_Id=10116 Gene_Symbol=Serpina6 Corticosteroid-binding globulin precursor	340	362	K.AMLQLDEGNVLPgNSTNGAPLHLR.S	0.01000000000040000000000.0	352
IPI00210824	Tax_Id=10116 Gene_Symbol=Serpina6 Corticosteroid-binding globulin precursor	340	362	K.AMLQLDEGNVLPgNSTNGAPLHLR.S	0.01000000000040040000000.0	352
IPI00210872	Tax_Id=10116 Gene_Symbol=Mep1a Meprin A subunit alpha precursor	535	552	K.YQTSSAIgNGSVIWDRPTK.V	0.000000040000000000.0	542
IPI00210900	Tax_Id=10116 Gene_Symbol=Ambp AMBP protein precursor	226	245	K.KEDSCQLgNYSEGPCLGMQQK.Y	0.00000004000000000000.0	233
IPI00210900	Tax_Id=10116 Gene_Symbol=Ambp AMBP protein precursor	226	245	K.KEDSCQLgNYSEGPCLGMQQK.Y	0.00000004000000001000.0	233
IPI00210900	Tax_Id=10116 Gene_Symbol=Ambp AMBP protein precursor	227	245	K.EDSCQLgNYSEGPCLGMQQK.Y	0.0000004000000000000.0	233
IPI00210900	Tax_Id=10116 Gene_Symbol=Ambp AMBP protein precursor	227	245	K.EDSCQLgNYSEGPCLGMQQK.Y	0.0000004000000001000.0	233
IPI00210975	Tax_Id=10116 Gene_Symbol=Hyou1 Hypoxia up-regulated protein 1 precursor	136	158	R.FQISPQLQFSPEEVLGMVLgNYSR.S	0.00000000000000000004000.0	155
IPI00210975	Tax_Id=10116 Gene_Symbol=Hyou1 Hypoxia up-regulated protein 1 precursor	860	868	K.VIgNDTWTWK.N	0.004000000.0	862
IPI00210975	Tax_Id=10116 Gene_Symbol=Hyou1 Hypoxia up-regulated protein 1 precursor	926	940	R.TEPPLgNASAGDQEEK.V	0.000004000000000.0	931
IPI00211075	Tax_Id=10116 Gene_Symbol=Serpina3n Serine protease inhibitor A3N precursor	103	115	K.FgNLTETPETEIHR.G	0.0400000000000.0	104
IPI00211075	Tax_Id=10116 Gene_Symbol=Serpina3n Serine protease inhibitor A3N precursor	244	265	K.LEDLTTPYVRDEELgNCTVVELK.Y	0.0000000000000040000000.0	258
IPI00211075	Tax_Id=10116 Gene_Symbol=Serpina3n Serine protease inhibitor A3N precursor	254	265	R.DEELgNCTVVELK.Y	0.000040000000.0	258
IPI00211075	Tax_Id=10116 Gene_Symbol=Serpina3n Serine protease inhibitor A3N precursor	266	281	K.YTGgNASALFILPDQGK.M	0.0004000000000000.0	269
IPI00211075	Tax_Id=10116 Gene_Symbol=Serpina3n Serine protease inhibitor A3N precursor	91	115	K.GNSMEEILEGLKFgNLTETPETEIHR.G	0.0001000000000400000000000.0	104
IPI00211096	Tax_Id=10116 Gene_Symbol=Hsd11b1 Isoform 11-HSD1A of Corticosteroid 11-beta-dehydrogenase isozyme 1	156	170	K.QSgNGSIAIISSMAGK.M	0.004000000000000.0	158
IPI00211616	Tax_Id=10116 Gene_Symbol=Slc3a2 4F2 cell-surface antigen heavy chain	160	171	K.NQKDEVgNETDLK.Q	0.000000400000.0	166
IPI00211648	Tax_Id=10116 Gene_Symbol=Slc3a1 Neutral and basic amino acid transport protein rBAT	321	339	K.DLRNEIQVgNTSQIPDTVTR.Y	0.0000000040000000000.0	329
IPI00211648	Tax_Id=10116 Gene_Symbol=Slc3a1 Neutral and basic amino acid transport protein rBAT	324	339	R.NEIQVgNTSQIPDTVTR.Y	0.0000040000000000.0	329
IPI00211648	Tax_Id=10116 Gene_Symbol=Slc3a1 Neutral and basic amino acid transport protein rBAT	324	339	R.NEIQVgNTSQIPDTVTR.Y	0.4000040000000000.0	329
IPI00211989	Tax_Id=10116 Gene_Symbol=Khk Isoform C of Ketohexokinase	79	108	R.RGVDVSQVAWQSQGDTPCSCCIVNNSgNGSR.T	0.000000000000000000000000004000.0	105
IPI00211989	Tax_Id=10116 Gene_Symbol=Khk Isoform C of Ketohexokinase	79	108	R.RGVDVSQVAWQSQGDTPCSCCIVNNSgNGSR.T	0.000000000000000000000000404000.0	105
IPI00211989	Tax_Id=10116 Gene_Symbol=Khk Isoform C of Ketohexokinase	79	108	R.RGVDVSQVAWQSQGDTPCSCCIVgNNSNGSR.T	0.000000000000000000000004400000.0	102
IPI00211989	Tax_Id=10116 Gene_Symbol=Khk Isoform C of Ketohexokinase	79	108	R.RGVDVSQVAWQSQGDTPCSCCIVgNNSgNGSR.T	0.000000000000000000000004004000.0	102105
IPI00211989	Tax_Id=10116 Gene_Symbol=Khk Isoform C of Ketohexokinase	80	108	R.GVDVSQVAWQSQGDTPCSCCIVNNSgNGSR.T	0.00000000000000000000000004000.0	105
IPI00211989	Tax_Id=10116 Gene_Symbol=Khk Isoform C of Ketohexokinase	80	108	R.GVDVSQVAWQSQGDTPCSCCIVNNSgNGSR.T	0.00000000000000000000000404000.0	105
IPI00211989	Tax_Id=10116 Gene_Symbol=Khk Isoform C of Ketohexokinase	80	108	R.GVDVSQVAWQSQGDTPCSCCIVgNNSNGSR.T	0.00000000000000000000004400000.0	102
IPI00211989	Tax_Id=10116 Gene_Symbol=Khk Isoform C of Ketohexokinase	80	108	R.GVDVSQVAWQSQGDTPCSCCIVgNNSgNGSR.T	0.00000000000000000000004004000.0	102105
IPI00211989	Tax_Id=10116 Gene_Symbol=Khk Isoform C of Ketohexokinase	80	108	R.GVDVSQVAWQSQGDTPCSCCIVgNNSgNGSR.T	0.00000000000000000000004404000.0	102105
IPI00212014	Tax_Id=10116 Gene_Symbol=Vcp Transitional endoplasmic reticulum ATPase	390	424	K.LADDVDLEQVAgNETHGHVGADLAALCSEAALQAIR.K	0.00000000000400000000000000000000000.0	401
IPI00212512	Tax_Id=10116 Gene_Symbol=Psmd1 26S proteasome non-ATPase regulatory subunit 1	728	751	K.FGAILAQGILDAGGHgNVTISLQSR.T	0.000000000000000400000000.0	743
IPI00212546	Tax_Id=10116 Gene_Symbol=Emb Embigin precursor	106	120	K.DDALLETTDGFgNTTK.M	0.000000000004000.0	117
IPI00212666	Tax_Id=10116 Gene_Symbol=Mug1 Isoform 1 of Murinoglobulin-1 precursor	1002	1012	K.YLgNETQQLTEK.I	0.00400000000.0	1004
IPI00212666	Tax_Id=10116 Gene_Symbol=Mug1 Isoform 1 of Murinoglobulin-1 precursor	386	404	K.AQEAGYTgNATTTDQHGLAK.F	0.0000000400000000000.0	393
IPI00212708	Tax_Id=10116 Gene_Symbol=Fetub Fetub protein	146	162	R.RVLYLPAYgNCTLRPVSK.R	0.00000000400000000.0	154
IPI00212708	Tax_Id=10116 Gene_Symbol=Fetub Fetub protein	147	162	R.VLYLPAYgNCTLRPVSK.R	0.0000000400000000.0	154
IPI00212731	Tax_Id=10116 Gene_Symbol=Ctsd Cathepsin D precursor	249	261	R.YYHGELSYLgNVTR.K	0.0000000004000.0	258
IPI00212868	Tax_Id=10116 Gene_Symbol=Lamb2 Laminin subunit beta-2 precursor	1306	1315	R.DGLALgNLTLR.Q	0.0000040000.0	1311
IPI00212933	Tax_Id=10116 Gene_Symbol=Slc5a1 Sodium/glucose cotransporter 1	239	252	K.AIPTLVSDGgNITVK.E	0.00000000040000.0	248
IPI00213036	Tax_Id=10116 Gene_Symbol=C4a Complement C4 precursor	1321	1331	K.ALgNVTLSSMGR.N	0.00400000000.0	1323
IPI00213036	Tax_Id=10116 Gene_Symbol=C4a Complement C4 precursor	1321	1331	K.ALgNVTLSSMGR.N	0.00400000100.0	1323
IPI00213182	Tax_Id=10116 Gene_Symbol=Cpd Isoform 1 of Carboxypeptidase D precursor	170	189	R.LLgNTTDVYLLPSLNPDGFER.A	0.00400000000000000000.0	172
IPI00213463	Tax_Id=10116 Gene_Symbol=Actn4 Alpha-actinin-4	675	691	R.ISIEMgNGTLEDQLSHLK.Q	0.00000400000000000.0	680
IPI00213463	Tax_Id=10116 Gene_Symbol=Actn4 Alpha-actinin-4	814	837	R.IMSVVDPgNHSGLVTFQAFIDFMSR.E	0.000000040000000000000000.0	821
IPI00213569	Tax_Id=10116 Gene_Symbol=Ugt1a1 UDP-glucuronosyltransferase 1-1 precursor	80	99	R.KYPVPFQNEgNVTAAFVELGR.S	0.00000000040000000000.0	89
IPI00213644	Tax_Id=10116 Gene_Symbol=Ppib Peptidyl-prolyl cis-trans isomerase B precursor	146	158	K.DTgNGSQFFITTVK.T	0.0040000000000.0	148
IPI00214299	Tax_Id=10116 Gene_Symbol=Cbs Isoform I of Cystathionine beta-synthase	274	314	K.IIGVDPEGSILAEPEELgNQTEQTAYEVEGIGYDFIPTVLDR.A	0.00000000000000000400000000000000000000000.0	291
IPI00214373	Tax_Id=10116 Gene_Symbol=Aadat Kynurenine/alpha-aminoadipate aminotransferase mitochondrial precursor	193	212	K.FLYTIPNGNgNPTGNSLTGDR.K	0.00000040040000000000.0	202
IPI00214373	Tax_Id=10116 Gene_Symbol=Aadat Kynurenine/alpha-aminoadipate aminotransferase mitochondrial precursor	50	62	K.SAVFTVEgNGSTIR.F	0.0000000400000.0	57
IPI00214456	Tax_Id=10116 Gene_Symbol=Adk Adenosine kinase	208	223	R.TFTLgNLSAPFISQFFK.E	0.0000400000000000.0	212
IPI00214787	Tax_Id=10116 Gene_Symbol=Slc16a1 Monocarboxylate transporter 1	473	494	K.ETQSPAPLQgNSSGDPAEEESPV.-	0.0000000004000000000000.0	482
IPI00214859	Tax_Id=10116 Gene_Symbol=Col18a1 similar to Collagen alpha-1(XVIII) chain precursor	587	611	R.DGQQgNISLLYTEPGASQTQTGASFR.L	0.0000400000000000000000000.0	591
IPI00215190	Tax_Id=10116 Gene_Symbol=Fkbp9 FK506-binding protein 9 precursor	283	301	R.YHYgNGTLLDGTLFDSSYSR.N	0.0004000000000000000.0	286
IPI00215291	Tax_Id=10116 Gene_Symbol=Bat1a;Atp6v1g2 Spliceosome RNA helicase Bat1	399	428	K.ILNDVQDRFEVgNISELPDEIDISSYIEQTR.-	0.004000000004000000000000000000.0	410
IPI00230859	Tax_Id=10116 Gene_Symbol=Akr1a1 Alcohol dehydrogenase	43	61	R.HIDCASVYGgNETEIGEALK.E	0.0000000004000000000.0	52
IPI00230862	Tax_Id=10116 Gene_Symbol=Anpep Aminopeptidase N	111	125	R.FTCgNETTNVIIIHSK.K	0.000400000000000.0	114
IPI00230862	Tax_Id=10116 Gene_Symbol=Anpep Aminopeptidase N	231	252	K.ASFNITLIHPNgNLTALSNMLPK.D	0.0000000000440000000000.0	242
IPI00230862	Tax_Id=10116 Gene_Symbol=Anpep Aminopeptidase N	231	252	K.ASFNITLIHPNgNLTALSNMLPK.D	0.0000000000440000001000.0	242
IPI00230862	Tax_Id=10116 Gene_Symbol=Anpep Aminopeptidase N	231	252	K.ASFgNITLIHPNNLTALSNMLPK.D	0.0004000000400000001000.0	234
IPI00230862	Tax_Id=10116 Gene_Symbol=Anpep Aminopeptidase N	231	252	K.ASFgNITLIHPNgNLTALSNMLPK.D	0.0004000000040000000000.0	234242
IPI00230862	Tax_Id=10116 Gene_Symbol=Anpep Aminopeptidase N	231	252	K.ASFgNITLIHPNgNLTALSNMLPK.D	0.0004000000040000001000.0	234242
IPI00230862	Tax_Id=10116 Gene_Symbol=Anpep Aminopeptidase N	231	252	K.ASFgNITLIHPNgNLTALSNMLPK.D	0.0004000000040000040000.0	234242
IPI00230862	Tax_Id=10116 Gene_Symbol=Anpep Aminopeptidase N	256	273	R.TLQEDPSWgNVTEFHPTPK.M	0.000000004000000000.0	264
IPI00230862	Tax_Id=10116 Gene_Symbol=Anpep Aminopeptidase N	769	792	R.DLVVGLYSQWMgNNSDNNPIHPNLR.S	0.000000000004000000000000.0	780
IPI00230862	Tax_Id=10116 Gene_Symbol=Anpep Aminopeptidase N	769	792	R.DLVVGLYSQWMgNNSDNNPIHPNLR.S	0.000000000004400000000000.0	780
IPI00230862	Tax_Id=10116 Gene_Symbol=Anpep Aminopeptidase N	769	792	R.DLVVGLYSQWMgNNSDNNPIHPNLR.S	0.000000000014000000000000.0	780
IPI00230907	Tax_Id=10116 Gene_Symbol=Mif Macrophage migration inhibitory factor	95	115	R.VYINYYDMNAANVGWgNGSTFA.-	0.000000000000000400000.0	110
IPI00230941	Tax_Id=10116 Gene_Symbol=Vim Vimentin	451	466	R.DGQVIgNETSQHHDDLE.-	0.0000040000000000.0	456
IPI00230946	Tax_Id=10116 Gene_Symbol=Dpp7 Dipeptidyl-peptidase 2 precursor	318	355	R.ALAGLVYgNSSGMEPCFDIYQMYQSCADPTGCGTGSNAR.A	0.00000004000000000000000000000000000000.0	325
IPI00231197	Tax_Id=10116 Gene_Symbol=Cd36 Platelet glycoprotein 4	407	426	K.RPYIVPILWLgNETGTIGDEK.A	0.00000000004000000000.0	417
IPI00231197	Tax_Id=10116 Gene_Symbol=Cd36 Platelet glycoprotein 4	64	82	R.QFWIFDVQNPEEVAKgNSSK.I	0.0000000000000004000.0	79
IPI00231264	Tax_Id=10116 Gene_Symbol=Pon1 Serum paraoxonase/arylesterase 1	251	260	K.HAgNWTLTPLK.V	0.0040000000.0	253
IPI00231264	Tax_Id=10116 Gene_Symbol=Pon1 Serum paraoxonase/arylesterase 1	33	46	R.EVTPVDLPgNCTLVK.G	0.00000000400000.0	41
IPI00231356	Tax_Id=10116 Gene_Symbol=Mthfd1 C-1-tetrahydrofolate synthase, cytoplasmic	617	653	K.DAIKPNLMQTLEGTPVFVHAGPFANIAHGgNSSIIADR.I	0.0000000000000000000000000000040000000.0	646
IPI00231359	Tax_Id=10116 Gene_Symbol=Acads Acetyl-Coenzyme A dehydrogenase, short chain	139	173	K.QQWITPFTNGDKIGCFALSEPGgNGSDAGAASTTAR.E	0.00000000400000000000004000000000000.0	161
IPI00231359	Tax_Id=10116 Gene_Symbol=Acads Acetyl-Coenzyme A dehydrogenase, short chain	151	173	K.IGCFALSEPGgNGSDAGAASTTAR.E	0.00000000004000000000000.0	161
IPI00231359	Tax_Id=10116 Gene_Symbol=Acads Acetyl-Coenzyme A dehydrogenase, short chain	151	185	K.IGCFALSEPGgNGSDAGAASTTAREEGDSWVLgNGTK.A	0.00000000004000000000000000000004000.0	161182
IPI00231359	Tax_Id=10116 Gene_Symbol=Acads Acetyl-Coenzyme A dehydrogenase, short chain	174	185	R.EEGDSWVLgNGTK.A	0.000000004000.0	182
IPI00231423	Tax_Id=10116 Gene_Symbol=C9 C9 protein	263	279	K.KVGVDEVSPEKgNSSKPK.D	0.00000000000400000.0	274
IPI00231423	Tax_Id=10116 Gene_Symbol=C9 C9 protein	264	279	K.VGVDEVSPEKgNSSKPK.D	0.0000000000400000.0	274
IPI00231478	Tax_Id=10116 Gene_Symbol=Scarb2 Lysosome membrane protein 2	116	134	K.AYIFERgNQSVGDPTVDLIR.T	0.0000004000000000000.0	122
IPI00231478	Tax_Id=10116 Gene_Symbol=Scarb2 Lysosome membrane protein 2	235	262	K.TSLDWWTTDTCNMIgNGTDGDSFHPLISK.D	0.0000000000000040000000000000.0	249
IPI00231601	Tax_Id=10116 Gene_Symbol=Ptprc Isoform 4 of Leukocyte common antigen precursor	115	121	K.FGgNVTVR.Y	0.0040000.0	117
IPI00231611	Tax_Id=10116 Gene_Symbol=Fh1 Isoform Mitochondrial of Fumarate hydratase, mitochondrial precursor	181	210	K.SQSSgNDTFPTAMHIAAALEVHQVLLPGLQK.L	0.000040000000000000000000000000.0	185
IPI00231643	Tax_Id=10116 Gene_Symbol=Sod1 Superoxide dismutase	81	103	R.HVGDLGNVAAGKDGVAgNVSIEDR.V	0.00000000000000004000000.0	97
IPI00231643	Tax_Id=10116 Gene_Symbol=Sod1 Superoxide dismutase	93	103	K.DGVAgNVSIEDR.V	0.00004000000.0	97
IPI00231726	Tax_Id=10116 Gene_Symbol=Gnai3 Guanine nucleotide-binding protein G	145	161	R.EYQLgNDSASYYLNDLDR.I	0.00004000000000000.0	149
IPI00231767	Tax_Id=10116 Gene_Symbol=Tpi1 Triosephosphate isomerase	195	206	K.CgNVSEGVAQCTR.I	0.040000000000.0	196
IPI00231789	Tax_Id=10116 Gene_Symbol=Mme Neprilysin	142	152	R.SCIgNESAIDSR.G	0.00040000000.0	145
IPI00231789	Tax_Id=10116 Gene_Symbol=Mme Neprilysin	276	293	K.VMELEKEIAgNATTKPEDR.N	0.000000000400000000.0	285
IPI00231789	Tax_Id=10116 Gene_Symbol=Mme Neprilysin	276	293	K.VMELEKEIAgNATTKPEDR.N	0.010000000400000000.0	285
IPI00231789	Tax_Id=10116 Gene_Symbol=Mme Neprilysin	276	302	K.VMELEKEIAgNATTKPEDRNDPMLLYNK.M	0.000000000400000000000000000.0	285
IPI00231789	Tax_Id=10116 Gene_Symbol=Mme Neprilysin	282	293	K.EIAgNATTKPEDR.N	0.000400000000.0	285
IPI00231789	Tax_Id=10116 Gene_Symbol=Mme Neprilysin	282	302	K.EIAgNATTKPEDRNDPMLLYNK.M	0.000400000000000000000.0	285
IPI00231988	Tax_Id=10116 Gene_Symbol=Ptprf Leukocyte common antigen-related phosphatase precursor	939	947	R.ITgNYTVVYR.D	0.004000000.0	941
IPI00324019	Tax_Id=10116 Gene_Symbol=Serpina1 Alpha-1-antiproteinase precursor	92	112	R.KQILEGLEFgNLTQIPEADIHK.A	0.000000000400000000000.0	101
IPI00324019	Tax_Id=10116 Gene_Symbol=Serpina1 Alpha-1-antiproteinase precursor	93	112	K.QILEGLEFgNLTQIPEADIHK.A	0.00000000400000000000.0	101
IPI00324102	Tax_Id=10116 Gene_Symbol=Fgl2 fibrinogen-like 2	167	180	K.VAgNLTSVVNSLDSK.C	0.00400000000000.0	169
IPI00324102	Tax_Id=10116 Gene_Symbol=Fgl2 fibrinogen-like 2	248	256	R.LDGSTgNFTR.G	0.000004000.0	253
IPI00324302	Tax_Id=10116 Gene_Symbol=Acat1 Acetyl-CoA acetyltransferase, mitochondrial precursor	271	300	K.EgNGTVTAANASTLNDGAAAVVLMTAEAAQR.L	0.040000000000000000000000000000.0	272
IPI00324585	Tax_Id=10116 Gene_Symbol=Itga1 Integrin alpha-1 precursor	1112	1124	K.SEgNSSLTLSSSNR.K	0.0040000000000.0	1114
IPI00324585	Tax_Id=10116 Gene_Symbol=Itga1 Integrin alpha-1 precursor	525	534	K.VYVYAVgNQTR.F	0.0000004000.0	531
IPI00324585	Tax_Id=10116 Gene_Symbol=Itga1 Integrin alpha-1 precursor	774	805	R.VTLDFgNLTDPENGPVLDDALPNSVHEHIPFAK.D	0.00000400000000000000000000000000.0	779
IPI00324585	Tax_Id=10116 Gene_Symbol=Itga1 Integrin alpha-1 precursor	774	805	R.VTLDFgNLTDPENGPVLDDALPNSVHEHIPFAK.D	0.00000400000400000000000000000000.0	779
IPI00324585	Tax_Id=10116 Gene_Symbol=Itga1 Integrin alpha-1 precursor	95	110	K.LDLPVgNTSIPNVTEIK.E	0.0000040000000000.0	100
IPI00324633	Tax_Id=10116 Gene_Symbol=Glud1 Glutamate dehydrogenase 1, mitochondrial precursor	192	200	K.gNYTDNELEK.I	0.400000000.0	192
IPI00324893	Tax_Id=10116 Gene_Symbol=Ywhaz 14-3-3 protein zeta/delta	223	245	R.DgNLTLWTSDTQGDEAEAGEGGEN.-	0.04000000000000000000000.0	224
IPI00324987	Tax_Id=10116 Gene_Symbol=P2rx4 P2X purinoceptor 4	181	190	K.AAEgNFTLLVK.N	0.0004000000.0	184
IPI00325135	Tax_Id=10116 Gene_Symbol=Ywhae 14-3-3 protein epsilon	226	255	R.DgNLTLWTSDMQGDGEEQNKEALQDVEDENQ.-	0.040000000100000004000000000000.0	227
IPI00325312	Tax_Id=10116 Gene_Symbol=Prom1 prominin 1 isoform 1	202	214	K.QIDYILGQYgNTTK.N	0.0000000004000.0	211
IPI00325312	Tax_Id=10116 Gene_Symbol=Prom1 prominin 1 isoform 1	259	269	K.DALQgNMSSSLK.S	0.00004000000.0	263
IPI00325312	Tax_Id=10116 Gene_Symbol=Prom1 prominin 1 isoform 1	259	269	K.DALQgNMSSSLK.S	0.00004100000.0	263
IPI00325312	Tax_Id=10116 Gene_Symbol=Prom1 prominin 1 isoform 1	273	286	R.DASTQLSTgNLTSVR.N	0.00000000400000.0	281
IPI00325312	Tax_Id=10116 Gene_Symbol=Prom1 prominin 1 isoform 1	306	331	K.ICDSLRPQLSNLGSNHgNGSQLPSVDR.E	0.00000000000000004000000000.0	322
IPI00325312	Tax_Id=10116 Gene_Symbol=Prom1 prominin 1 isoform 1	540	552	K.NPDIgNMTFEQVYR.D	0.0000400000000.0	544
IPI00325312	Tax_Id=10116 Gene_Symbol=Prom1 prominin 1 isoform 1	540	552	K.NPDIgNMTFEQVYR.D	0.0000410000000.0	544
IPI00325312	Tax_Id=10116 Gene_Symbol=Prom1 prominin 1 isoform 1	708	732	K.VLASLDSAQHFLTSgNLSSIVIGETK.K	0.0000000000000040000000000.0	722
IPI00325847	Tax_Id=10116 Gene_Symbol=Cp GPI-anchored ceruloplasmin	129	144	K.ANEGAIYPDgNTTDFQR.A	0.0000000004000000.0	138
IPI00325860	Tax_Id=10116 Gene_Symbol=Podxl Podocalyxin precursor	271	290	K.LKCDPAIKPHEELLILgNLTR.D	0.00000000000000004000.0	287
IPI00325860	Tax_Id=10116 Gene_Symbol=Podxl Podocalyxin precursor	273	290	K.CDPAIKPHEELLILgNLTR.D	0.000000000000004000.0	287
IPI00325860	Tax_Id=10116 Gene_Symbol=Podxl Podocalyxin precursor	423	452	R.LTEELQTVENGYHDgNPTLEVMETPSEMQEK.K	0.000000000000004000000000000000.0	437
IPI00325860	Tax_Id=10116 Gene_Symbol=Podxl Podocalyxin precursor	454	485	K.VVNLNGELGDSWIVPLDgNLTKEDLDEEEDTHL.-	0.00000000000000000400000000000000.0	471
IPI00325860	Tax_Id=10116 Gene_Symbol=Podxl Podocalyxin precursor	454	485	K.VVNLNGELGDSWIVPLDgNLTKEDLDEEEDTHL.-	0.00004000000000000400000000000000.0	471
IPI00326070	Tax_Id=10116 Gene_Symbol=Ctsl Cathepsin L1 precursor	213	233	K.YRAEYAVAgNDTGFVDIPQQEK.A	0.000000004000000000000.0	221
IPI00326070	Tax_Id=10116 Gene_Symbol=Ctsl Cathepsin L1 precursor	215	233	R.AEYAVAgNDTGFVDIPQQEK.A	0.0000004000000000000.0	221
IPI00326070	Tax_Id=10116 Gene_Symbol=Ctsl Cathepsin L1 precursor	238	272	K.AVATVGPISVAMDASHPSLQFYSSGIYYEPgNCSSK.D	0.00000000000000000000000000000040000.0	268
IPI00326140	Tax_Id=10116 Gene_Symbol=Pzp Alpha-1-macroglobulin precursor	146	169	R.VVSVDISFRPVgNETFPVVYIENPK.R	0.000000000004000000000000.0	157
IPI00326140	Tax_Id=10116 Gene_Symbol=Pzp Alpha-1-macroglobulin precursor	146	170	R.VVSVDISFRPVgNETFPVVYIENPKR.N	0.0000000000040000000000000.0	157
IPI00326140	Tax_Id=10116 Gene_Symbol=Pzp Alpha-1-macroglobulin precursor	375	391	K.GQPIPNKgNLTVQVNSVR.S	0.00000004000000000.0	382
IPI00326140	Tax_Id=10116 Gene_Symbol=Pzp Alpha-1-macroglobulin precursor	375	391	K.GQPIPNKgNLTVQVNSVR.S	0.00000004000004000.0	382
IPI00326140	Tax_Id=10116 Gene_Symbol=Pzp Alpha-1-macroglobulin precursor	375	391	K.GQPIPNKgNLTVQVNSVR.S	0.00000404000000000.0	382
IPI00326140	Tax_Id=10116 Gene_Symbol=Pzp Alpha-1-macroglobulin precursor	562	587	K.CFANTVgNLSFPSAQSLPASDTHLTVK.A	0.00000040000000000000000000.0	568
IPI00326140	Tax_Id=10116 Gene_Symbol=Pzp Alpha-1-macroglobulin precursor	562	587	K.CFANTVgNLSFPSAQSLPASDTHLTVK.A	0.00040040000000000000000000.0	568
IPI00326140	Tax_Id=10116 Gene_Symbol=Pzp Alpha-1-macroglobulin precursor	878	900	K.SLGEVgNFTATAEALQSPELCGNK.V	0.00000400000000000000000.0	883
IPI00326225	Tax_Id=10116 Gene_Symbol=Dao1 D-amino-acid oxidase	172	198	R.GGVDVIIgNCTGVWAGALQADASLQPGR.G	0.000000040000000000000000000.0	179
IPI00326225	Tax_Id=10116 Gene_Symbol=Dao1 D-amino-acid oxidase	234	260	K.TVTLGGVFQLGgNWSELNSVHDHNTIWK.S	0.000000000004000000000000000.0	245
IPI00326305	Tax_Id=10116 Gene_Symbol=Atp1a1 Sodium/potassium-transporting ATPase subunit alpha-1 precursor	205	227	R.IISANGCKVDgNSSLTGESEPQTR.S	0.00000000004000000000000.0	215
IPI00326305	Tax_Id=10116 Gene_Symbol=Atp1a1 Sodium/potassium-transporting ATPase subunit alpha-1 precursor	205	227	R.IISANGCKVDgNSSLTGESEPQTR.S	0.00004000004000000000000.0	215
IPI00326305	Tax_Id=10116 Gene_Symbol=Atp1a1 Sodium/potassium-transporting ATPase subunit alpha-1 precursor	213	227	K.VDgNSSLTGESEPQTR.S	0.004000000000000.0	215
IPI00326305	Tax_Id=10116 Gene_Symbol=Atp1a1 Sodium/potassium-transporting ATPase subunit alpha-1 precursor	630	647	K.GVGIISEGgNETVEDIAAR.L	0.000000004000000000.0	638
IPI00326305	Tax_Id=10116 Gene_Symbol=Atp1a1 Sodium/potassium-transporting ATPase subunit alpha-1 precursor	708	726	R.QGAIVAVTGDGVgNDSPALK.K	0.0000000000004000000.0	720
IPI00326462	Tax_Id=10116 Gene_Symbol=Enpp3 Ectonucleotide pyrophosphatase/phosphodiesterase family member 3	593	605	R.LgNLSGGEVSATEK.T	0.0400000000000.0	594
IPI00326566	Tax_Id=10116 Gene_Symbol=Hdgf Hepatoma-derived growth factor	198	232	K.gNSTPSEPDSGQGPPPEEEEGEEEAAKEEAEAQGVR.D	0.40000000000000000000000000000000000.0	198
IPI00326948	Tax_Id=10116 Gene_Symbol=Hsd17b4 Hsd17b4 protein	685	696	K.gNGSGEVYQGPAK.G	0.400000000000.0	685
IPI00326990	Tax_Id=10116 Gene_Symbol=Slc15a2 Oligopeptide transporter, kidney isoform	537	552	K.DLgNISLDTDAPLSVGK.D	0.0040000000000000.0	539
IPI00326990	Tax_Id=10116 Gene_Symbol=Slc15a2 Oligopeptide transporter, kidney isoform	537	560	K.DLgNISLDTDAPLSVGKDYGVSAYR.T	0.004000000000000000000000.0	539
IPI00327143	Tax_Id=10116 Gene_Symbol=Alpl Alkaline phosphatase, tissue-nonspecific isozyme precursor	137	152	R.TRCgNTTQGNEVTSILR.W	0.0004000000000000.0	140
IPI00327143	Tax_Id=10116 Gene_Symbol=Alpl Alkaline phosphatase, tissue-nonspecific isozyme precursor	139	152	R.CgNTTQGNEVTSILR.W	0.04000000000000.0	140
IPI00327143	Tax_Id=10116 Gene_Symbol=Alpl Alkaline phosphatase, tissue-nonspecific isozyme precursor	230	241	K.gNRTDVEYELDEK.A	0.400000000000.0	230
IPI00327182	Tax_Id=10116 Gene_Symbol=Kng1 T-kininogen 1 precursor	161	171	K.HAVEHFNgNNTK.H	0.00000004000.0	168
IPI00327182	Tax_Id=10116 Gene_Symbol=Kng1 T-kininogen 1 precursor	196	207	K.IIYSIVQTgNCSK.E	0.000000004000.0	204
IPI00327182	Tax_Id=10116 Gene_Symbol=Kng1 T-kininogen 1 precursor	196	214	K.IIYSIVQTgNCSKEDFPSLR.E	0.0000000040000000000.0	204
IPI00327182	Tax_Id=10116 Gene_Symbol=Kng1 T-kininogen 1 precursor	80	97	K.EGgNCSVQSGLTWQDCDFK.D	0.004000000000000000.0	82
IPI00327398	Tax_Id=10116 Gene_Symbol=Enpep Isoform 1 of Glutamyl aminopeptidase	233	243	K.ATYgNISLIHPK.E	0.00040000000.0	236
IPI00327398	Tax_Id=10116 Gene_Symbol=Enpep Isoform 1 of Glutamyl aminopeptidase	309	319	K.QTAEYAAgNITK.A	0.00000004000.0	316
IPI00327398	Tax_Id=10116 Gene_Symbol=Enpep Isoform 1 of Glutamyl aminopeptidase	577	590	K.WTENGNSgNITVYYR.S	0.00000004000000.0	584
IPI00327398	Tax_Id=10116 Gene_Symbol=Enpep Isoform 1 of Glutamyl aminopeptidase	577	590	K.WTENGNSgNITVYYR.S	0.00040004000000.0	584
IPI00327398	Tax_Id=10116 Gene_Symbol=Enpep Isoform 1 of Glutamyl aminopeptidase	594	609	R.EGITLNAgNLSGDGFLK.I	0.0000000400000000.0	601
IPI00327398	Tax_Id=10116 Gene_Symbol=Enpep Isoform 1 of Glutamyl aminopeptidase	746	764	K.MGAGEALGgNASQLFEAWLK.G	0.0000000040000000000.0	754
IPI00327398	Tax_Id=10116 Gene_Symbol=Enpep Isoform 1 of Glutamyl aminopeptidase	746	764	K.MGAGEALGgNASQLFEAWLK.G	0.1000000040000000000.0	754
IPI00327398	Tax_Id=10116 Gene_Symbol=Enpep Isoform 1 of Glutamyl aminopeptidase	765	774	K.GgNESIPVNLR.L	0.0400000000.0	766
IPI00327398	Tax_Id=10116 Gene_Symbol=Enpep Isoform 1 of Glutamyl aminopeptidase	780	800	R.YGMQNSGNEAAWgNYTLEQYQK.T	0.001000000000400000000.0	792
IPI00327469	Tax_Id=10116 Gene_Symbol=Ahsg Alpha-2-HS-glycoprotein precursor	155	165	R.FgNDTNVVHTVK.T	0.04000000000.0	156
IPI00327469	Tax_Id=10116 Gene_Symbol=Ahsg Alpha-2-HS-glycoprotein precursor	155	165	R.FgNDTNVVHTVK.T	0.04004000000.0	156
IPI00327469	Tax_Id=10116 Gene_Symbol=Ahsg Alpha-2-HS-glycoprotein precursor	166	181	K.TALAAFNAQNgNGTYFK.L	0.0000000000400000.0	176
IPI00327469	Tax_Id=10116 Gene_Symbol=Ahsg Alpha-2-HS-glycoprotein precursor	166	181	K.TALAAFNAQNgNGTYFK.L	0.0000000004400000.0	176
IPI00327469	Tax_Id=10116 Gene_Symbol=Ahsg Alpha-2-HS-glycoprotein precursor	166	181	K.TALAAFNAQNgNGTYFK.L	0.0000004000400000.0	176
IPI00327469	Tax_Id=10116 Gene_Symbol=Ahsg Alpha-2-HS-glycoprotein precursor	72	103	R.RPFGEVYELEIDTLETTCHALDPTPLAgNCSVR.Q	0.00000000000000000000000000040000.0	99
IPI00327697	Tax_Id=10116 Gene_Symbol=Dpep1 Dipeptidase 1 precursor	108	130	R.MCQLYPETFECVTgNSSDILQAFR.R	0.00000000000004000000000.0	121
IPI00327697	Tax_Id=10116 Gene_Symbol=Dpep1 Dipeptidase 1 precursor	331	339	R.RgNWTETEVR.G	0.040000000.0	332
IPI00327697	Tax_Id=10116 Gene_Symbol=Dpep1 Dipeptidase 1 precursor	53	70	R.KSEAgNLSALAETHTNIPK.L	0.000040000000000000.0	57
IPI00327697	Tax_Id=10116 Gene_Symbol=Dpep1 Dipeptidase 1 precursor	54	70	K.SEAgNLSALAETHTNIPK.L	0.00040000000000000.0	57
IPI00339118	Tax_Id=10116 Gene_Symbol=Enpp1 Isoform 2 of Ectonucleotide pyrophosphatase/phosphodiesterase family member 1	321	331	K.VYgNGSVPFEER.I	0.00400000000.0	323
IPI00339124	Tax_Id=10116 Gene_Symbol=Atp1b1 Sodium/potassium-transporting ATPase subunit beta-1	151	170	R.FKLDWLGgNCSGLNDESYGYK.E	0.00000004000000000000.0	158
IPI00339124	Tax_Id=10116 Gene_Symbol=Atp1b1 Sodium/potassium-transporting ATPase subunit beta-1	151	170	R.FKLDWLGgNCSGLNDESYGYK.E	0.00000004000040000000.0	158
IPI00339124	Tax_Id=10116 Gene_Symbol=Atp1b1 Sodium/potassium-transporting ATPase subunit beta-1	153	170	K.LDWLGgNCSGLNDESYGYK.E	0.000004000000000000.0	158
IPI00339148	Tax_Id=10116 Gene_Symbol=Hspd1 60 kDa heat shock protein, mitochondrial precursor	97	121	K.LVQDVAgNNTNEEAGDGTTTATVLAR.S	0.0000004000000000000000000.0	103
IPI00339167	Tax_Id=10116 Gene_Symbol=Tuba1b Tubulin alpha-1B chain	374	390	R.AVCMLSgNTTAIAEAWAR.L	0.00000040000000000.0	380
IPI00357921	Tax_Id=10116 Gene_Symbol=RGD1307907_predicted similar to CG17660-PA	173	181	K.TMFgNSTDIR.F	0.010400000.0	176
IPI00358043	Tax_Id=10116 Gene_Symbol=Mmrn2_predicted multimerin 2	828	847	K.FgNATSVNVGSGYFPEHGYFR.A	0.04000000000000000000.0	829
IPI00358371	Tax_Id=10116 Gene_Symbol=RGD1560871_predicted similar to plexin A1	1040	1050	K.YgNYTEDPTILR.I	0.04000000000.0	1041
IPI00358382	Tax_Id=10116 Gene_Symbol=C8a_predicted complement component 8, alpha polypeptide	430	444	R.WSTGLAHgNSSAITYR.S	0.000000040000000.0	437
IPI00359847	Tax_Id=10116 Gene_Symbol=Galns N-acetylgalactosamine-6-sulfatase precursor	201	219	K.TGEAgNLTQLYLQEALDFIR.T	0.0000400000000000000.0	205
IPI00360085	Tax_Id=10116 Gene_Symbol=Pign_predicted Phosphatidylinositol glycan class N	115	131	K.GWKENPVEFDSLFgNESK.Y	0.00000000000004000.0	128
IPI00361106	Tax_Id=10116 Gene_Symbol=RGD1560062_predicted hypothetical protein LOC309816	541	564	R.LTLEELDEIIKgNASGIYAEIDGAK.N	0.000000000004000000000000.0	552
IPI00361301	Tax_Id=10116 Gene_Symbol=Lama2_predicted similar to Laminin alpha-2 chain precursor	1607	1619	K.ILYGLEgNATQELK.H	0.0000004000000.0	1613
IPI00361686	Tax_Id=10116 Gene_Symbol=C1qbp Complement component 1 Q subcomponent-binding protein, mitochondrial precursor	103	117	K.MSGDWELEVgNGTEAK.L	0.000000000400000.0	112
IPI00361686	Tax_Id=10116 Gene_Symbol=C1qbp Complement component 1 Q subcomponent-binding protein, mitochondrial precursor	103	117	K.MSGDWELEVgNGTEAK.L	0.100000000400000.0	112
IPI00361798	Tax_Id=10116 Gene_Symbol=Igfbp7 Insulin-like growth factor binding protein 7	167	175	K.DIWgNITGAK.V	0.000400000.0	170
IPI00362395	Tax_Id=10116 Gene_Symbol=Esd esterase D/formylglutathione hydrolase	92	119	K.GEDDSWDFGTGAGFFVgNATEDPWNTNYR.M	0.0000000000000000400000000000.0	108
IPI00362755	Tax_Id=10116 Gene_Symbol=Tns similar to tensin	1318	1359	R.gNGTPGGSFVSPSPLSTSSPILSADSTSVGSFPSAGSSDQGPR.T	0.400000000000000000000000000000000000000000.0	1318
IPI00362757	Tax_Id=10116 Gene_Symbol=Vil1_predicted villin 1	10	23	K.GSLgNTTTPGIQIWR.I	0.00040000000000.0	13
IPI00363534	Tax_Id=10116 Gene_Symbol=Lama1 laminin, alpha 1	1343	1352	R.IAgNISMEVGR.K	0.0040000000.0	1345
IPI00363534	Tax_Id=10116 Gene_Symbol=Lama1 laminin, alpha 1	1343	1352	R.IAgNISMEVGR.K	0.0040010000.0	1345
IPI00363534	Tax_Id=10116 Gene_Symbol=Lama1 laminin, alpha 1	1977	1990	K.LDELKgNLTSQFQER.V	0.00000400000000.0	1982
IPI00363534	Tax_Id=10116 Gene_Symbol=Lama1 laminin, alpha 1	2021	2032	K.ELAVAAgNETAAR.T	0.000000400000.0	2027
IPI00363534	Tax_Id=10116 Gene_Symbol=Lama1 laminin, alpha 1	661	680	R.EIDRDQLMTVLAgNVTHLLIR.A	0.00000000000040000000.0	673
IPI00363849	Tax_Id=10116 Gene_Symbol=Lamc1 similar to Laminin gamma-1 chain precursor	1104	1114	R.VgNNSLHSQISR.L	0.04000000000.0	1105
IPI00363849	Tax_Id=10116 Gene_Symbol=Lamc1 similar to Laminin gamma-1 chain precursor	1216	1232	R.TLAGEgNQTALEIEELNR.K	0.00000400000000000.0	1221
IPI00363849	Tax_Id=10116 Gene_Symbol=Lamc1 similar to Laminin gamma-1 chain precursor	1374	1387	R.RVNDgNKTAAEEALR.R	0.00004000000000.0	1378
IPI00363849	Tax_Id=10116 Gene_Symbol=Lamc1 similar to Laminin gamma-1 chain precursor	1375	1387	R.VNDgNKTAAEEALR.R	0.0004000000000.0	1378
IPI00363849	Tax_Id=10116 Gene_Symbol=Lamc1 similar to Laminin gamma-1 chain precursor	645	653	K.LLNgNLTSIK.I	0.000400000.0	648
IPI00364124	Tax_Id=10116 Gene_Symbol=Lrpap1 Alpha-2-macroglobulin receptor-associated protein precursor	260	275	R.VIDLWDLAQSAgNFTEK.E	0.0000000000040000.0	271
IPI00364124	Tax_Id=10116 Gene_Symbol=Lrpap1 Alpha-2-macroglobulin receptor-associated protein precursor	260	281	R.VIDLWDLAQSAgNFTEKELESFR.E	0.0000000000040000000000.0	271
IPI00364124	Tax_Id=10116 Gene_Symbol=Lrpap1 Alpha-2-macroglobulin receptor-associated protein precursor	260	285	R.VIDLWDLAQSAgNFTEKELESFREELK.H	0.00000000000400000000000000.0	271
IPI00364132	Tax_Id=10116 Gene_Symbol=Taf15_predicted 59 kDa protein	215	253	R.DYGPRPDADSESDNSDgNNTIFVQGLGEGVSTDQVGEFFK.Q	0.000000000000000040000000000000000000000.0	231
IPI00364321	Tax_Id=10116 Gene_Symbol=Etfb Electron transfer flavoprotein subunit beta	125	161	K.QAIDDDCgNQTGQMTAGLLDWPQGTFASQVTLEGDKVK.V	0.0000000400000000000000000000000000000.0	132
IPI00364439	Tax_Id=10116 Gene_Symbol=RGD1559682_predicted similar to Peptidyl-prolyl cis-trans isomerase A	2	19	M.VNLTMFFgNITADGEPLGR.V	0.000010040000000000.0	9
IPI00364439	Tax_Id=10116 Gene_Symbol=RGD1559682_predicted similar to Peptidyl-prolyl cis-trans isomerase A	2	19	M.VgNLTMFFNITADGEPLGR.V	0.040010000000000000.0	3
IPI00364439	Tax_Id=10116 Gene_Symbol=RGD1559682_predicted similar to Peptidyl-prolyl cis-trans isomerase A	92	118	K.HTGPGILSMANAGPNTgNGSQFFICTAK.T	0.000000000000000040000000000.0	108
IPI00364764	Tax_Id=10116 Gene_Symbol=RGD1559717_predicted similar to R17.3	369	383	R.CSGDGLDSDGgNQTLR.W	0.000000000040000.0	379
IPI00364925	Tax_Id=10116 Gene_Symbol=Dhtkd1 Probable 2-oxoglutarate dehydrogenase E1 component DHKTD1, mitochondrial precursor	305	324	R.QQSQEDGDYSPgNGSAQPGDK.V	0.00000000000400000000.0	316
IPI00364925	Tax_Id=10116 Gene_Symbol=Dhtkd1 Probable 2-oxoglutarate dehydrogenase E1 component DHKTD1, mitochondrial precursor	565	590	K.gNGTNLDWATAETLALGSLLAQGFNVR.L	0.40000000000000000000000000.0	565
IPI00365297	Tax_Id=10116 Gene_Symbol=Agmat Agmatine ureohydrolase	98	121	R.IREESLMLGTVgNPSTGALPFQSLR.V	0.000000000004000000000000.0	109
IPI00365542	Tax_Id=10116 Gene_Symbol=Lamb1_predicted laminin, beta 1	1326	1345	R.SgNSTAGELDALQAEAGSLDK.T	0.04000000000000000000.0	1327
IPI00365542	Tax_Id=10116 Gene_Symbol=Lamb1_predicted laminin, beta 1	1383	1401	R.VgNASTTDPNSTVEQSALTR.D	0.0400000000000000000.0	1384
IPI00365663	Tax_Id=10116 Gene_Symbol=Bckdha branched chain ketoacid dehydrogenase E1, alpha polypeptide	401	422	R.KLKPgNPSLLFSDVYQEMPAQLR.R	0.0000400000000000000000.0	405
IPI00365784	Tax_Id=10116 Gene_Symbol=LOC306805 Similar to asporin	272	285	K.ITDIEgNGTFANIPR.V	0.00000400000000.0	277
IPI00365985	Tax_Id=10116 Gene_Symbol=Tra1_predicted 93 kDa protein	44	67	R.TDDEVVQREEEAIQLDGLgNASQIR.E	0.000000000000000000400000.0	62
IPI00366226	Tax_Id=10116 Gene_Symbol=Gns Glucosamine (N-acetyl)-6-sulfatase	173	183	K.YYgNYTLSINGK.A	0.00400000400.0	175
IPI00366226	Tax_Id=10116 Gene_Symbol=Gns Glucosamine (N-acetyl)-6-sulfatase	359	393	K.MLVSNIDLGPTILDLAGYDLgNKTQMDGTSLLPILK.G	0.00000000000000000000400000000000000.0	379
IPI00366496	Tax_Id=10116 Gene_Symbol=Slc44a2_predicted similar to CTL2 gene	407	419	K.TCNPETFPLgNESR.Q	0.0000000004000.0	416
IPI00366665	Tax_Id=10116 Gene_Symbol=Car12 Membrane-bound carbonic anhydrase 12	46	85	K.KYPSCGGLLQSPIDLHSDILQYDASLAPLQFQGYgNVSVEK.L	0.0000000000000000000000000000000000400000.0	80
IPI00366665	Tax_Id=10116 Gene_Symbol=Car12 Membrane-bound carbonic anhydrase 12	86	97	K.LLgNLTNDGHSVR.L	0.004000000000.0	88
IPI00366665	Tax_Id=10116 Gene_Symbol=Car12 Membrane-bound carbonic anhydrase 12	86	97	K.LLgNLTNDGHSVR.L	0.004004000000.0	88
IPI00367524	Tax_Id=10116 Gene_Symbol=LOC682827 35 kDa protein	219	260	R.ESYSIPGFgNGSEDCAALEQLLEGYDQQDQDQVSEVCNSPLFK.Y	0.000000004000000000000000000000000000000000.0	227
IPI00368347	Tax_Id=10116 Gene_Symbol=Ube1x Ubiquitin-activating enzyme E1, Chr X	44	57	K.gNGSEADIDESLYSR.Q	0.40000000000000.0	44
IPI00368704	Tax_Id=10116 Gene_Symbol=RGD1566313_predicted similar to Murinoglobulin 1 homolog	1000	1010	K.YLgNETQQLTEK.I	0.00400000000.0	1002
IPI00368704	Tax_Id=10116 Gene_Symbol=RGD1566313_predicted similar to Murinoglobulin 1 homolog	386	404	K.AQGAGFTgNATTTDQHGLAK.F	0.0000000400000000000.0	393
IPI00368874	Tax_Id=10116 Gene_Symbol=LOC299458 LOC299458 protein	242	264	K.DLHVPIPAVVEMNPgNVSVFIPPR.D	0.00000000000000400000000.0	256
IPI00368874	Tax_Id=10116 Gene_Symbol=LOC299458 LOC299458 protein	242	264	K.DLHVPIPAVVEMNPgNVSVFIPPR.D	0.00000000000100400000000.0	256
IPI00369140	Tax_Id=10116 Gene_Symbol=RGD1309019_predicted 38 kDa protein	139	161	R.SVAgNLSSDCLDTCDTGAIWPGLK.D	0.00040000000000000000000.0	142
IPI00369140	Tax_Id=10116 Gene_Symbol=RGD1309019_predicted 38 kDa protein	162	180	K.DAFTgNVSSPDAGATLPNDK.A	0.0000400000000000000.0	166
IPI00369140	Tax_Id=10116 Gene_Symbol=RGD1309019_predicted 38 kDa protein	76	106	K.APSQgNTTEPDTHSLSPELQALISEVAQHDVR.D	0.0000400000000000000000000000000.0	80
IPI00369539	Tax_Id=10116 Gene_Symbol=Mfap4 Microfibrillar-associated protein 4	133	146	R.VDLEDFEgNNTAYAK.Y	0.00000004000000.0	140
IPI00369591	Tax_Id=10116 Gene_Symbol=Pvrl1 similar to poliovirus receptor-related 1	200	210	R.NPgNGTVTVISR.Y	0.00400000000.0	202
IPI00369995	Tax_Id=10116 Gene_Symbol=Lrp1 similar to low density lipoprotein receptor-related protein 1	3783	3798	K.LTSCATgNASMCGDEAR.C	0.0000004001000000.0	3789
IPI00370427	Tax_Id=10116 Gene_Symbol=Tinag Tubulointerstitial nephritis antigen	356	365	R.ISSgNETEIMR.E	0.0004000000.0	359
IPI00370427	Tax_Id=10116 Gene_Symbol=Tinag Tubulointerstitial nephritis antigen	356	365	R.ISSgNETEIMR.E	0.0004000010.0	359
IPI00370450	Tax_Id=10116 Gene_Symbol=Plxnb2 plexin B2	1056	1082	K.VVFLSPAVPEEPEAYgNLTALIQMDGHR.A	0.000000000000000400000000000.0	1071
IPI00370450	Tax_Id=10116 Gene_Symbol=Plxnb2 plexin B2	1087	1108	R.TEAGAFEYVADPTFEgNFTGGVK.K	0.0000000000000004000000.0	1102
IPI00370450	Tax_Id=10116 Gene_Symbol=Plxnb2 plexin B2	1087	1109	R.TEAGAFEYVADPTFEgNFTGGVKK.Q	0.00000000000000040000000.0	1102
IPI00370450	Tax_Id=10116 Gene_Symbol=Plxnb2 plexin B2	519	533	K.SCVTITDAFPQgNMSR.R	0.000000000004100.0	530
IPI00370450	Tax_Id=10116 Gene_Symbol=Plxnb2 plexin B2	755	766	K.LQVTLYgNCSFGR.S	0.000000400000.0	761
IPI00370596	Tax_Id=10116 Gene_Symbol=RGD1562373_predicted 3-ketoacyl-CoA thiolase B, peroxisomal precursor	266	289	K.DGGSTTAGgNSSQVSDGAAAVLLAR.R	0.000000004000000000000000.0	274
IPI00371182	Tax_Id=10116 Gene_Symbol=Galntl4_predicted UDP-N-acetyl-alpha-D-galactosamine:polypeptide N- acetylgalactosaminyltransferase-like 4	318	326	K.LEgNSTAPIR.S	0.004000000.0	320
IPI00371665	Tax_Id=10116 Gene_Symbol=Sema4b similar to Semaphorin-4B precursor	539	549	R.KIgNSSLQLPDR.V	0.00400000000.0	541
IPI00371736	Tax_Id=10116 Gene_Symbol=LOC685174 similar to trinucleotide repeat containing 5	227	247	K.VVMDIPYELWgNETSAEVADLK.K	0.000000000040000000000.0	237
IPI00371853	Tax_Id=10116 Gene_Symbol=Col6a1_predicted similar to Collagen alpha-1(VI) chain precursor	788	811	K.ENYAELLDDGFLKgNITAQICIDKK.C	0.000000000000040000000000.0	801
IPI00372372	Tax_Id=10116 Gene_Symbol=Serpinc1 Serine (Or cysteine) peptidase inhibitor, clade C (Antithrombin), member 1	125	133	K.LGACgNNTLK.Q	0.000040000.0	129
IPI00372372	Tax_Id=10116 Gene_Symbol=Serpinc1 Serine (Or cysteine) peptidase inhibitor, clade C (Antithrombin), member 1	125	133	K.LGACgNNTLK.Q	0.000044000.0	129
IPI00372372	Tax_Id=10116 Gene_Symbol=Serpinc1 Serine (Or cysteine) peptidase inhibitor, clade C (Antithrombin), member 1	217	230	R.VTINNWVAgNKTEGR.I	0.00000000400000.0	225
IPI00372372	Tax_Id=10116 Gene_Symbol=Serpinc1 Serine (Or cysteine) peptidase inhibitor, clade C (Antithrombin), member 1	217	230	R.VTINNWVAgNKTEGR.I	0.00004000400000.0	225
IPI00372372	Tax_Id=10116 Gene_Symbol=Serpinc1 Serine (Or cysteine) peptidase inhibitor, clade C (Antithrombin), member 1	217	230	R.VTINNWVAgNKTEGR.I	0.00040000400000.0	225
IPI00372786	Tax_Id=10116 Gene_Symbol=Nid2 similar to nidogen 2 isoform 2	700	712	R.SFSLISGSIgNQTR.S	0.0000000004000.0	709
IPI00372786	Tax_Id=10116 Gene_Symbol=Nid2 similar to nidogen 2 isoform 2	716	723	R.IDQgNITYK.A	0.00040000.0	719
IPI00372839	Tax_Id=10116 Gene_Symbol=Col6a2 similar to procollagen, type VI, alpha 2	793	804	R.gNMTLFSDLVAEK.F	0.400000000000.0	793
IPI00373052	Tax_Id=10116 Gene_Symbol=Hmgn1 High mobility group nucleosomal binding domain 1	62	94	K.QAEVADQQTTDLPAENGETEgNQSPASEEEKEAK.S	0.000000000000000000004000000000000.0	82
IPI00373395	Tax_Id=10116 Gene_Symbol=C8g_predicted 22 kDa protein	171	184	R.GAgNLTEDQIFFFPK.Y	0.00400000000000.0	173
IPI00373408	Tax_Id=10116 Gene_Symbol=Sort1 Sortilin precursor	154	165	K.DITNLIgNNTFIR.T	0.000000400000.0	160
IPI00373752	Tax_Id=10116 Gene_Symbol=Flnb_predicted filamin, beta	2245	2265	K.gNGSCGVSYIAQEPGNYEVSIK.F	0.400000000000000000000.0	2245
IPI00388265	Tax_Id=10116 Gene_Symbol=Pgcp 48 kDa protein	375	387	K.EVMSLLQPLgNITK.V	0.0000000004000.0	384
IPI00388265	Tax_Id=10116 Gene_Symbol=Pgcp 48 kDa protein	375	387	K.EVMSLLQPLgNITK.V	0.0010000004000.0	384
IPI00388323	Tax_Id=10116 Gene_Symbol=Hspg2 396 kDa protein	3062	3083	R.SLTQGSMIVGNLAPVgNGTSQGK.F	0.0000000000000004000000.0	3077
IPI00388323	Tax_Id=10116 Gene_Symbol=Hspg2 396 kDa protein	3062	3083	R.SLTQGSMIVGNLAPVgNGTSQGK.F	0.0000001000000004000000.0	3077
IPI00388323	Tax_Id=10116 Gene_Symbol=Hspg2 396 kDa protein	65	71	R.ALVgNFTR.S	0.0004000.0	68
IPI00388355	Tax_Id=10116 Gene_Symbol=Manba Isoform 1 of Beta-mannosidase precursor	98	118	K.LIFDGVDTVAEILFNgNVTIGK.T	0.000000000000000400000.0	113
IPI00391769	Tax_Id=10116 Gene_Symbol=Cacna2d1 Voltage-gated calcium channel alpha2/delta-1 subunit	804	815	K.IDVNSWIEgNFTK.T	0.000000004000.0	812
IPI00391769	Tax_Id=10116 Gene_Symbol=Cacna2d1 Voltage-gated calcium channel alpha2/delta-1 subunit	977	989	K.SFSGLLDCGgNCSR.I	0.0000000004000.0	986
IPI00392894	Tax_Id=10116 Gene_Symbol=Mgam_predicted 89 kDa protein	31	47	K.MESDLAgNTTAGFTAALK.N	0.00000040000000000.0	37
IPI00392894	Tax_Id=10116 Gene_Symbol=Mgam_predicted 89 kDa protein	31	47	K.MESDLAgNTTAGFTAALK.N	0.10000040000000000.0	37
IPI00392894	Tax_Id=10116 Gene_Symbol=Mgam_predicted 89 kDa protein	338	361	K.LVIILDPAISgNNSLSSNPYGPYDR.G	0.000000000040000000000000.0	348
IPI00392894	Tax_Id=10116 Gene_Symbol=Mgam_predicted 89 kDa protein	367	380	K.VWVgNSSDGNALIGK.V	0.00040000000000.0	370
IPI00392894	Tax_Id=10116 Gene_Symbol=Mgam_predicted 89 kDa protein	584	601	K.DQDPASFGEDSLLLgNSSR.H	0.000000000000004000.0	598
IPI00393267	Tax_Id=10116 Gene_Symbol=Insr Tyrosine-protein kinase receptor	205	218	K.ECLGgNCSEPDDPTK.C	0.00004000000000.0	209
IPI00393333	Tax_Id=10116 Gene_Symbol=Atic Bifunctional purine biosynthesis protein PURH	359	379	K.gNGSYCVLQMDQSYKPDENEVR.T	0.400000000000000000000.0	359
IPI00400578	Tax_Id=10116 Gene_Symbol=Hp1bp3 Heterochromatin protein 1, binding protein 3	57	91	K.LAEGEEEKPEPDGSSEESISTVEEPEgNETPPAPSR.E	0.00000000000000000000000000400000000.0	83
IPI00400579	Tax_Id=10116 Gene_Symbol=Gaa Lysosomal alpha-glucosidase precursor	138	154	R.LEgNLSSTESGYTATLTR.T	0.00400000000000000.0	140
IPI00400579	Tax_Id=10116 Gene_Symbol=Gaa Lysosomal alpha-glucosidase precursor	904	934	R.EVTILGVTTAPTQVLSNGISVSgNFTYSPDDK.S	0.0000000000000000400000400000000.0	926
IPI00400619	Tax_Id=10116 Gene_Symbol=Tlr2 Toll-like receptor 2 variant 2	138	155	R.TLGETSLFSgNLTNLQTLR.V	0.000000000400000000.0	147
IPI00400738	Tax_Id=10116 Gene_Symbol=Galnt11 Polypeptide N-acetylgalactosaminyltransferase 11	425	432	K.SFGgNISER.V	0.00040000.0	428
IPI00409539	Tax_Id=10116 Gene_Symbol=Flna_predicted similar to Filamin-A	725	738	K.DNGgNGTYSCSYVPR.K	0.00040000000000.0	728
IPI00421539	Tax_Id=10116 Gene_Symbol=Aco2 Aconitate hydratase, mitochondrial precursor	379	395	R.VGLIGSCTgNSSYEDMGR.S	0.00000000400000000.0	387
IPI00421539	Tax_Id=10116 Gene_Symbol=Aco2 Aconitate hydratase, mitochondrial precursor	608	628	R.GHLDgNISNNLLIGAINIENGK.A	0.000040000000000000400.0	612
IPI00421601	Tax_Id=10116 Gene_Symbol=Asah1 N-acylsphingosine amidohydrolase 1	254	266	R.SVLEgNSTSYEEAK.N	0.0000400000000.0	258
IPI00421874	Tax_Id=10116 Gene_Symbol=Vdac1 Voltage-dependent anion-selective channel protein 1	237	256	K.VNgNSSLIGLGYTQTLKPGIK.L	0.00400000000000000000.0	239
IPI00421874	Tax_Id=10116 Gene_Symbol=Vdac1 Voltage-dependent anion-selective channel protein 1	33	61	K.TKSENGLEFTSSGSANTETTKVgNGSLETK.Y	0.00004000000000000000004000000.0	55
IPI00421874	Tax_Id=10116 Gene_Symbol=Vdac1 Voltage-dependent anion-selective channel protein 1	35	61	K.SENGLEFTSSGSANTETTKVgNGSLETK.Y	0.000000000000000000004000000.0	55
IPI00421874	Tax_Id=10116 Gene_Symbol=Vdac1 Voltage-dependent anion-selective channel protein 1	35	61	K.SENGLEFTSSGSANTETTKVgNGSLETK.Y	0.000000000000040000004000000.0	55
IPI00422076	Tax_Id=10116 Gene_Symbol=Thbs1 Thrombospondin 1	1065	1077	K.VVgNSTTGPGEHLR.N	0.0040000000000.0	1067
IPI00464518	Tax_Id=10116 Gene_Symbol=Hexb Beta-hexosaminidase beta chain precursor	298	317	K.VGPVDPSLgNTTYVFFDTFFK.E	0.00000000400000000000.0	306
IPI00464518	Tax_Id=10116 Gene_Symbol=Hexb Beta-hexosaminidase beta chain precursor	47	77	R.LLYISPENFQIDNSPgNSTAGPSCSLLLEAFR.R	0.0000000000000004000000000000000.0	62
IPI00464560	Tax_Id=10116 Gene_Symbol=Tmem30a Cell cycle control protein 50A	246	274	R.TDDLHPTLPAGQYYLgNITYNYPVHFFDGR.K	0.00000000000000040000000000000.0	261
IPI00464765	Tax_Id=10116 Gene_Symbol=Igsf4a Immunoglobulin superfamily, member 4A	100	111	R.FQLLgNFSSSELK.V	0.000040000000.0	104
IPI00464777	Tax_Id=10116 Gene_Symbol=LOC296318 Similar to Ndr3 protein	346	367	R.SVTSgNQSDGTQESCESPDVLDR.H	0.0000400000000000000000.0	350
IPI00464785	Tax_Id=10116 Gene_Symbol=Ppgb Protective protein for beta-galactosidase	136	153	K.MYVTgNDTEVAENNYQALK.D	0.000040000000000000.0	140
IPI00464785	Tax_Id=10116 Gene_Symbol=Ppgb Protective protein for beta-galactosidase	136	153	K.MYVTgNDTEVAENNYQALK.D	0.000040000000400000.0	140
IPI00464785	Tax_Id=10116 Gene_Symbol=Ppgb Protective protein for beta-galactosidase	136	153	K.MYVTgNDTEVAENNYQALK.D	0.000040000004000000.0	140
IPI00464785	Tax_Id=10116 Gene_Symbol=Ppgb Protective protein for beta-galactosidase	136	153	K.MYVTgNDTEVAENNYQALK.D	0.000040000004400000.0	140
IPI00464785	Tax_Id=10116 Gene_Symbol=Ppgb Protective protein for beta-galactosidase	136	153	K.MYVTgNDTEVAENNYQALK.D	0.100040000000000000.0	140
IPI00464785	Tax_Id=10116 Gene_Symbol=Ppgb Protective protein for beta-galactosidase	136	163	K.MYVTgNDTEVAENNYQALKDFYHLFPEYK.D	0.0000400000004000000000000000.0	140
[truncated: 61 more rows]

## Sheet: ERLIC04
Glycoproteins identified in ERLIC04
[truncated: 975 more rows]
